# Supplementary material
Source: PubMed Central journal article supplement (PMC3863681)
Supplement: NIHMS393264-supplement-Supplementary_Info.pdf [file NIHMS393264-supplement-Supplementary_Info.pdf]

Supplemental Figures for Shah et al: The clonal and mutational evolution spectrum of primary triple negative breast cancers

Figure 1: Distribution of sequence coverage of targeted exons for 54 tumour and normal exome capture libraries. Median of median coverage over targeted exons over all libraries was 60.5x.

{stfig:exome'coverage'boxp}

Figure 2: Distribution of the number of mutations per sample as it relates to cellularity according to pathologist review

{stfig:mutations'cellularity}

Figure 3: Somatic copy number aberration (CNA) landscape of triple negative breast cancers. **(a)** The somatic CNA landscape of Basal (top) and Other (bottom) triple negative cancers showing significant segmental CNA instability across the genome. The frequency alteration of each gene by Ensembl54 annotation is shown where deletions (blue) are reflected as negative frequencies and gains (red) are shown as positive frequencies. **(b)** Comparison of genomic instability between Basal and non-Basal cancers for each of the alteration states. Comparisons are shown as boxplots of the distribution of proportion of the genome altered for each CNA state over the population of 80 tumours that were classifiable by PAM50. All states except HLAMPs showed a statistically higher proportion of alteration in Basals than Others. **(c)** Proportion of homozygous somatic SNV mutations overlapping segmental CNAs, segregated by state. **(d)** RNASeq derived gene fusions supported by segmental CNA breakpoints in Basal (left) and Other (right) cancers depicted as circos diagrams. Chromosomes are arrayed around the circle and arcs between points on the circle represent gene fusions predicted by defuse [1].

{stfig:CNA'landscape}

Figure 4: The somatic CNA landscape of Basal (top) and Other (bottom) triple negative cancers from an external cohort of 122 TNBC tumours. The frequency alteration of each gene by Ensembl54 annotation is shown where deletions (blue) are reflected as negative frequencies and gains (red) are shown as positive frequencies. Patterns of alteration were consistent with the cohort of 104 TNBCs featured in this study.

{stfig:cna'freq'METABRIC}

Figure 5: Predicted intragenic homozygous deletions in PARK2 on chr6q26 inferred from Affymetrix SNP 6.0 arrays. Predictions for 6 cases are shown where vertical grey bars denote the boundaries of PARK2. Orange box on the ideogram (bottom right) indicates the genomic coordinates of the view. Each datapoint corresponds to the log ratio of representing total copy number. Bright green points indicate homozygous deletions inferred by segmentation by HMM-Dosage (Supplemental methods). Dark green points are predicted hemizygous regions and blue points are predicted neutral regions.

{ stfig:park2'homd }

Figure 6: Examples of four (multi-page PDF) somatic mutation-associated alternative splicing events indicated on the distribution of canonical and alternative exon junction usage. Specific cases that have a donor/acceptor dinucleotide splice site mutation are indicated as red dots. Distributions are shown for splice site mutation events in TP53, PIK3R1, LAMA2 and LAMB1. In all examples, cases harbouring a mutation in the splice sites show outlying alternative junction usage.

{ stfig:splice'site'examples }

Figure 7: List of deleterious variations occurring within RB predicted for the triple negative breast cancer set. The coordinates of the variations and of functional TFBS predicted with the reference sequence (without variation) are provided in the hg18 assembly. The most proximal gene is based on Ensembl annotation (release 63). In the two columns with sequences, the red nucleotides indicate a variation position. The last column highlights the variant position within the TFBS logo (red rectangle). The data are ranked by the ratio of the relative scores. The lower this value, the greater the predicted alteration to the recognition of the sequence by the TF. The rows with bold text reflect the most damaging impact predicted (ratio of relative score lower than 0.9 - see Supplemental methods).

{ stfig:tfbs'mutation }

Figure 8: Clustering of extreme CNA event (HOMD, HLAMP) into gene modules and functional pathways by Reactome analysis. Nodes in the network are genes affected by a high level amplification or homozygous deletion. Size of the node is proportional to the frequency of aberration in the population of 104 tumours. Edges between nodes represent protein interactions as described in the Reactome FI database [2]

{ stfig:CNA'modules'pathway }

Figure 9: Ab-initio clustering of the mutational profiles of cases and pathways. Pathway-based features were calculated based on the frequency of mutation in each pathway for a given case. Conservatively, we included 48 pathways showing enrichment from the entire network for further analysis (Table S14) containing 40 somatically mutated genes. For each tumour, we counted the number of times a gene in a given pathway was found to be mutated, producing a tumour-pathway matrix. Hierarchical clustering reveals a population structure where distinct groupings of cases by their pathway-based mutational profiles are evident. Annotations of the number of mutations in each case (scaled in blue), the PAM50 subtype and TP53, Rb1 and PTEN mutation status are shown across the top of the heatmap. Rows in the matrix correspond to pathways shown in Figure 3b. The relationship between genes and pathways in this analysis is such that a small number of highly connected gene nodes (drivers) will implicate many pathways, however the strength of pathway association is also modified by the presence of additional mutated genes, shown as a grayscale for each tumour-pathway data point.

{ stfig:networkclustering }

Figure 10: Probabilistic graphical model of a Dirichlet process for clonal frequency estimation. Left the random variables in the model are shown as nodes in a graph where shaded nodes are observed quantities and unshaded nodes are unobserved quantities we wish to estimate. The model inputs the total number of reference and variant reads at the mutation of interest, the observed copy number at the genomic position of each mutation  $i$  and then infers the genotype of the mutation ( $G_i$ ), the clonal frequency ( $\phi_i$ ) and the number of variant reads belonging to each clone ( $A_{var}^i, D_{var}^i$ ). The conditional probability distributions for the model are shown (right).

{ stfig:pyclone }

Figure 11: Clonal frequency analysis for all tumours with 10 more mutations in the TNBC cohort (multipage PDF). This figure shows on alternating pages, the clustering of the co-occurrence matrix for mutations to infer the assignment to clonal clusters and on the subsequent page the full inferred posterior distributions of the clonal frequency estimates as output from 2500 runs of the MCMC sampling of the Dirichlet process model. The mutations in the distribution plots are first ordered by the average clonal frequencies over each group of mutations. The mode of the clonal frequency estimate for each mutation is shown with a grey dot.

{stfig.omnibus'evolution}

Figure 12: Distribution of clonal frequencies across all mutations (adjusted for predicted normal contamination). Specific clonal frequencies are shown for TP53 mutations and PIK3CA mutations and reveals that the distribution of TP53 mutation is incompatible with the notion that it is always the founder mutation (and therefore present in all cells). Instead the distribution is skewed in favour of TP53 residing in a dominant proportion of cells, but exhibits a tail suggesting that in some tumours it occurs later in the evolution of the cancer.

{stfig.tp53clonality}

## References

- [1] McPherson, A. *et al.* deFuse: An Algorithm for Gene Fusion Discovery in Tumor RNA-Seq Data. *PLoS Comput Biol* **7** (2011).
- [2] Wu, G., Feng, X. & Stein, L. A human functional protein interaction network and its application to cancer data analysis. *Genome Biology* **11**, R53 (2010).

Figure S1

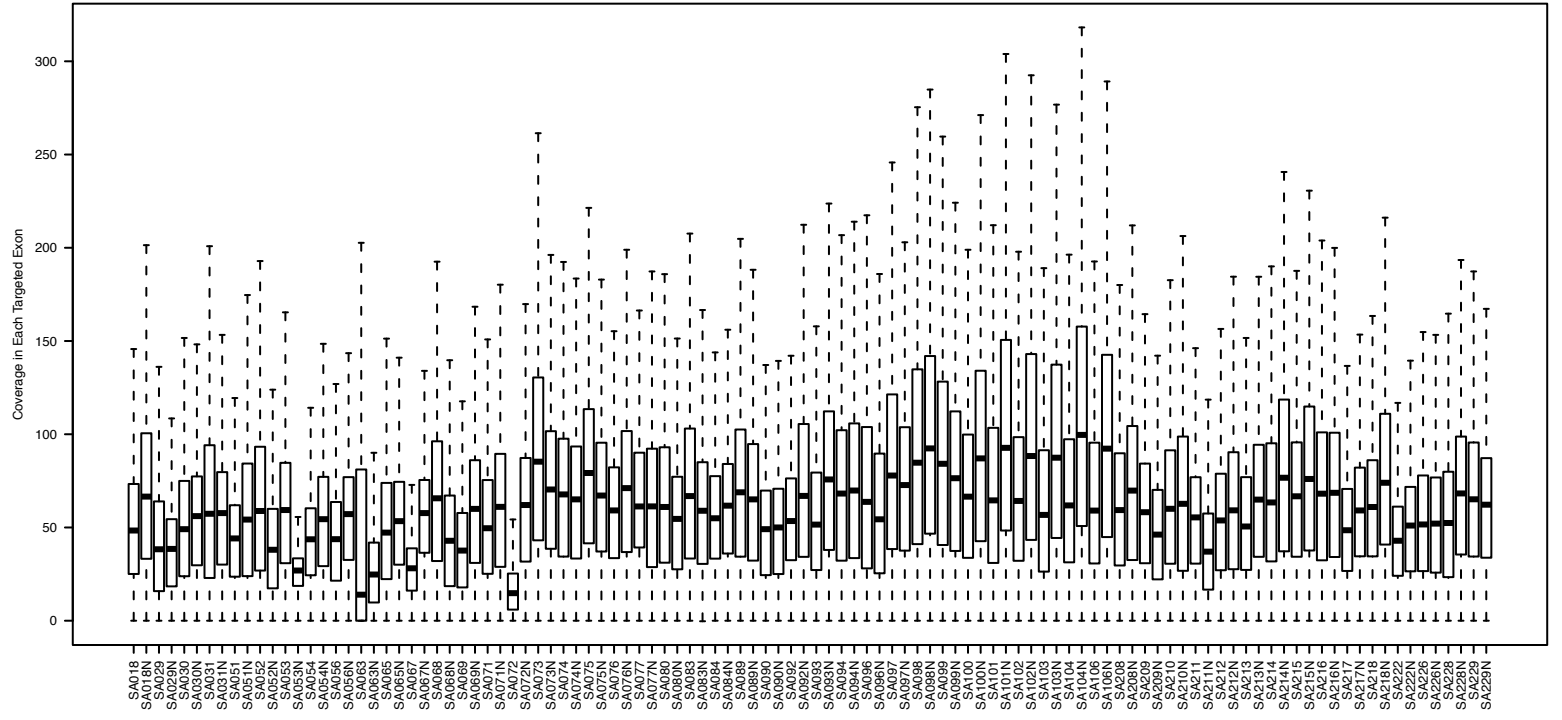

Figure S2

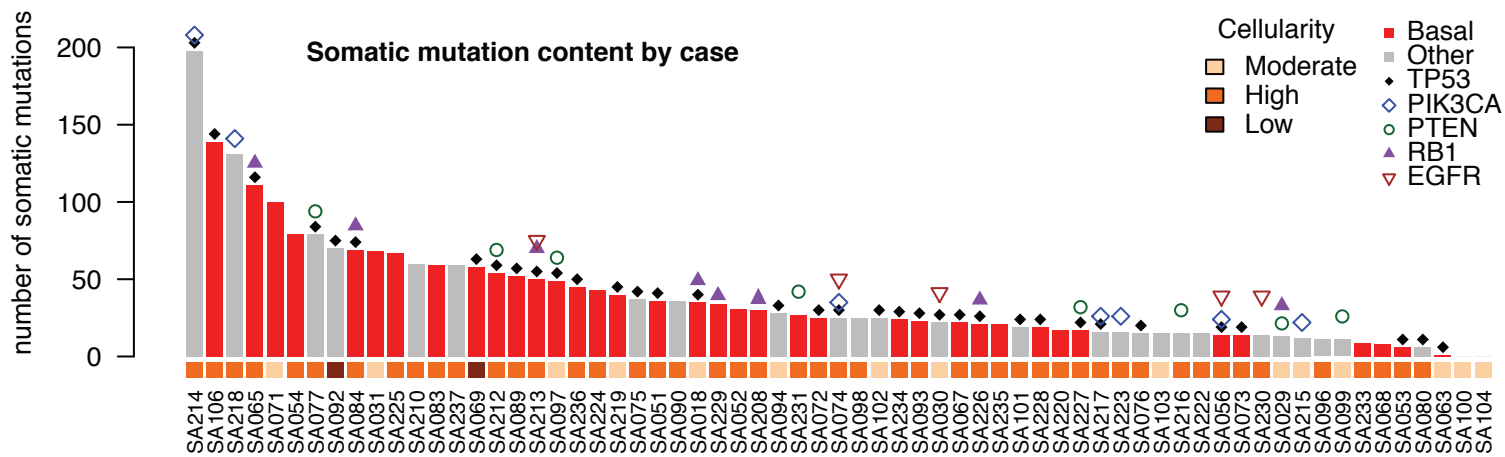

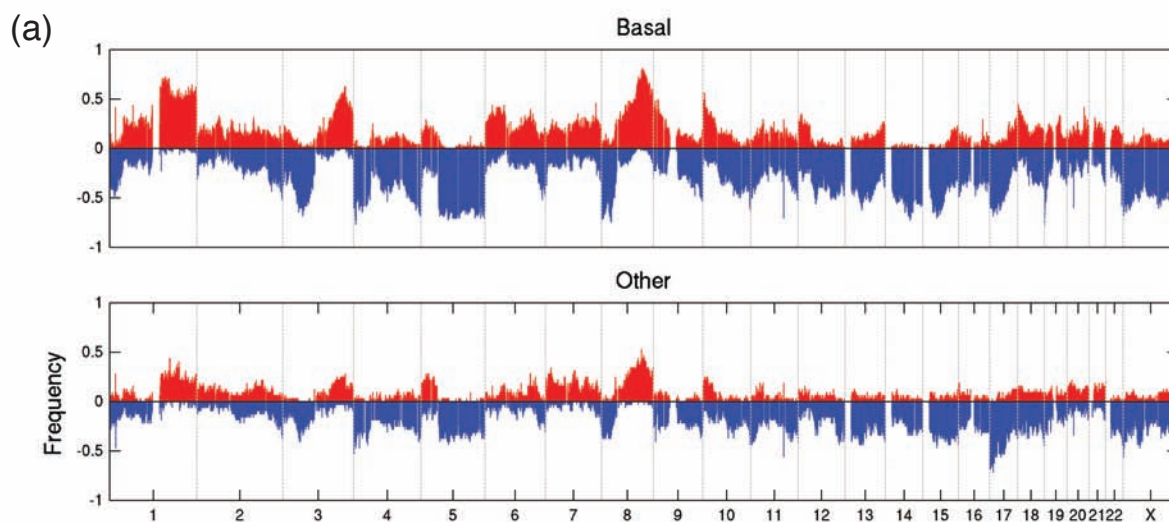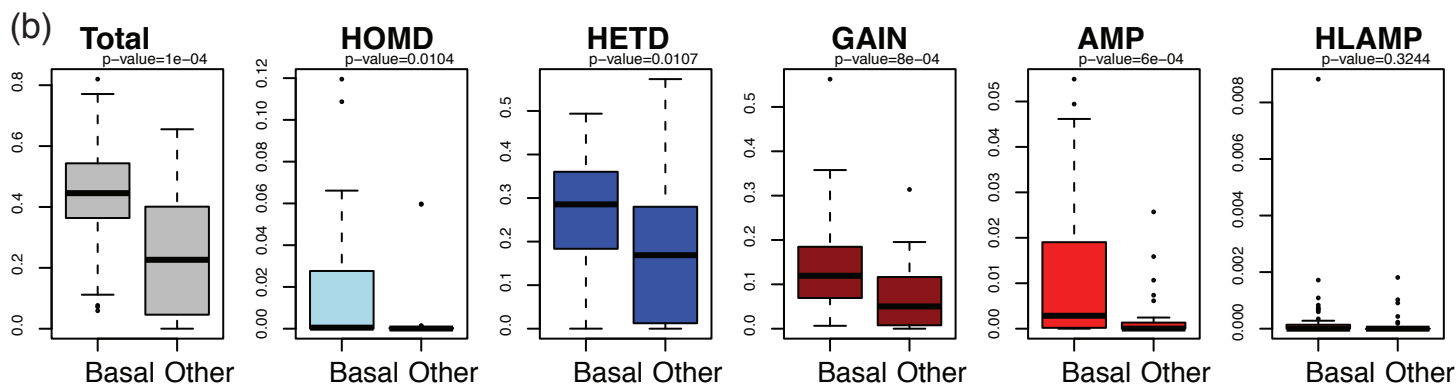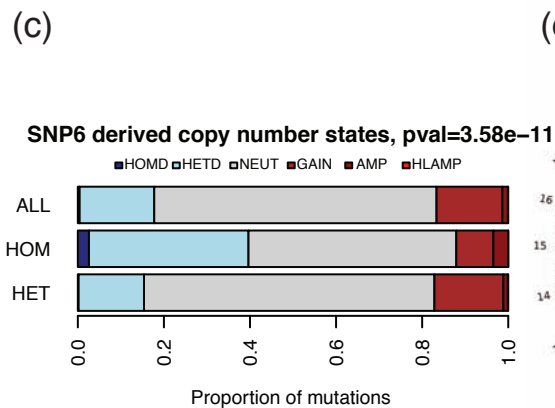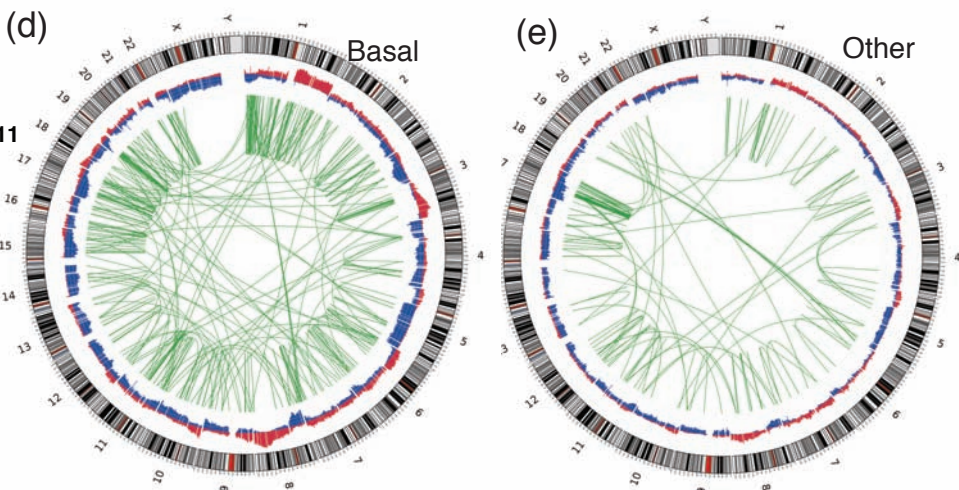



Figure S4

Basal

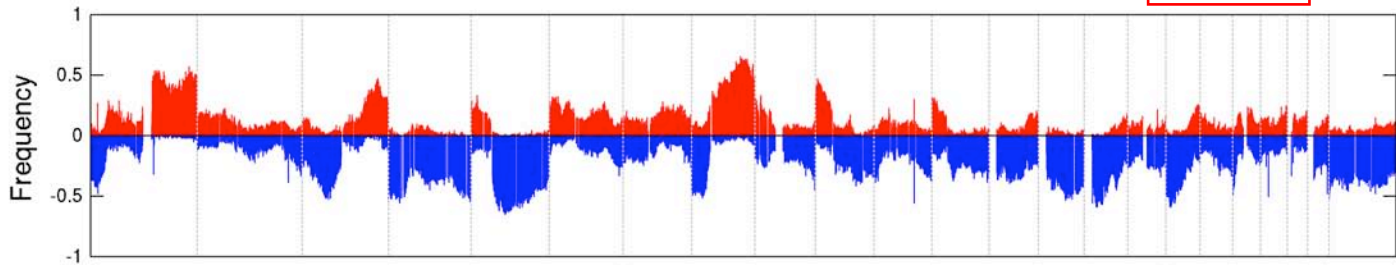

Other

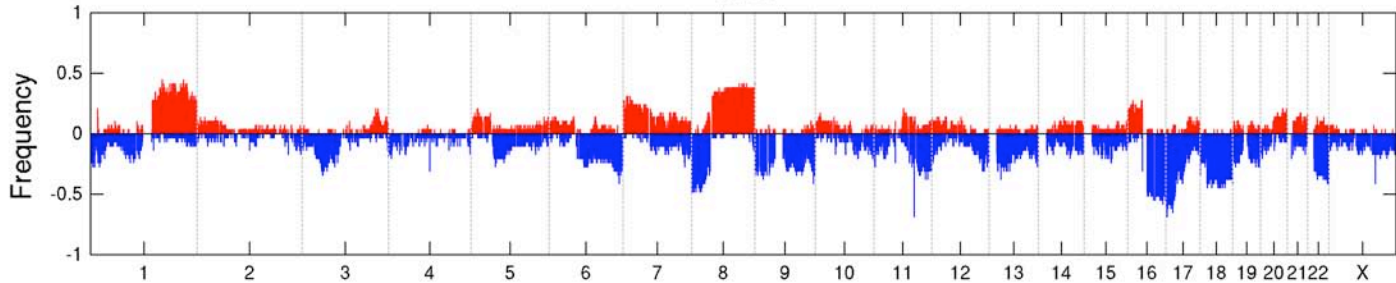

Figure S5

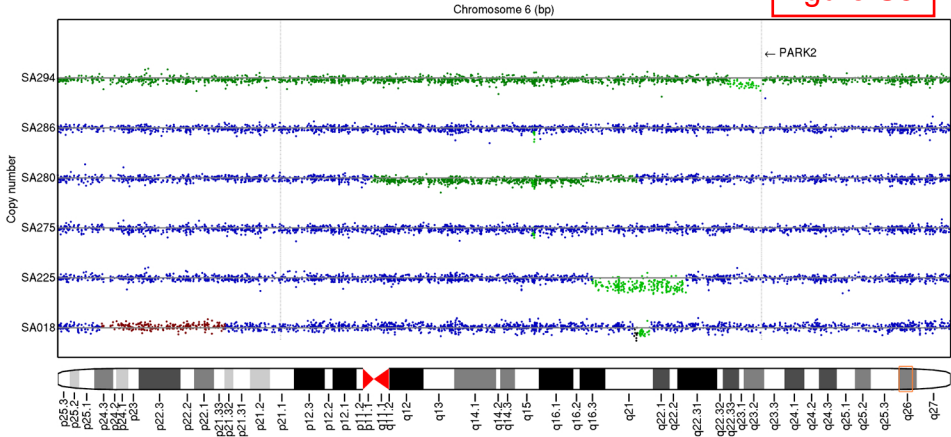

Canonical Junction

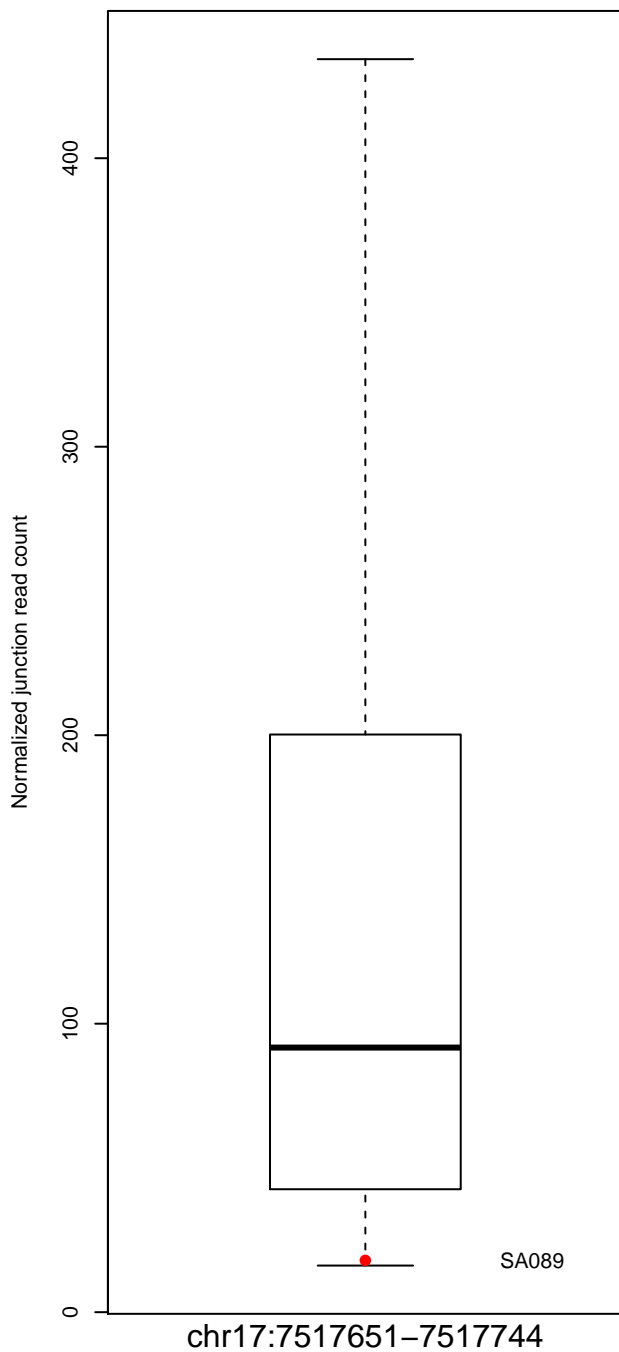

SA089, mutation chr17:7517653 gene TP53  
Alternative Junction 1

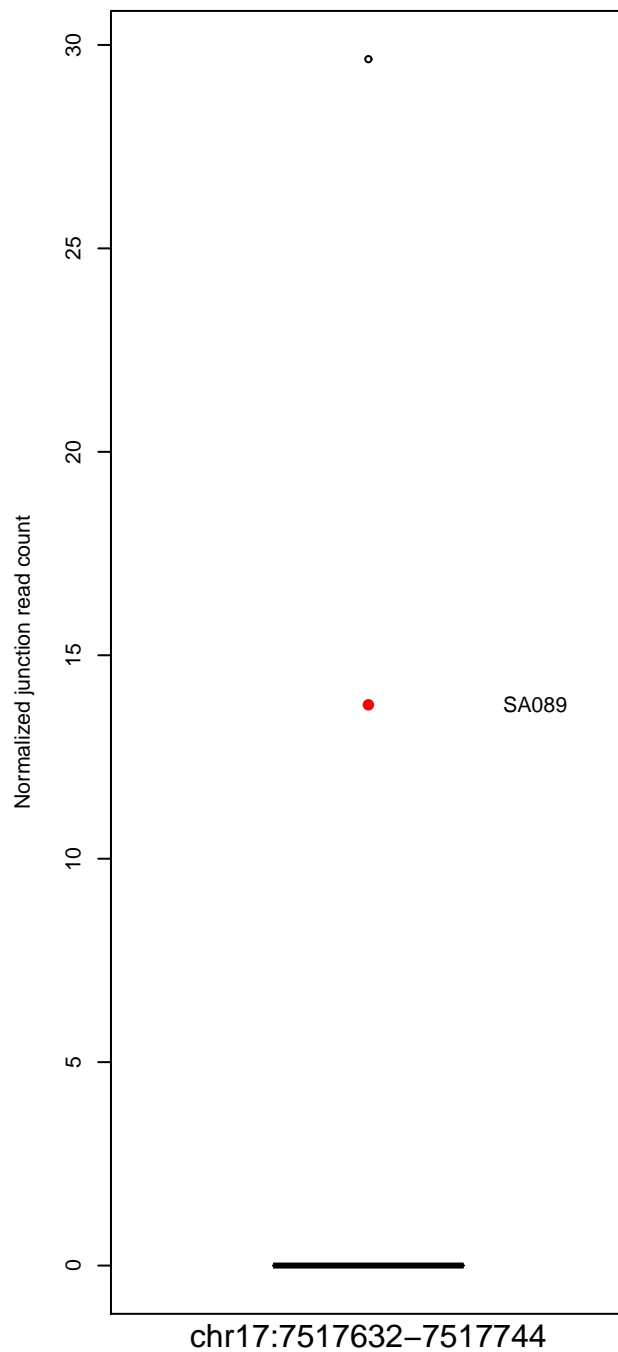

Alternative Junction 2

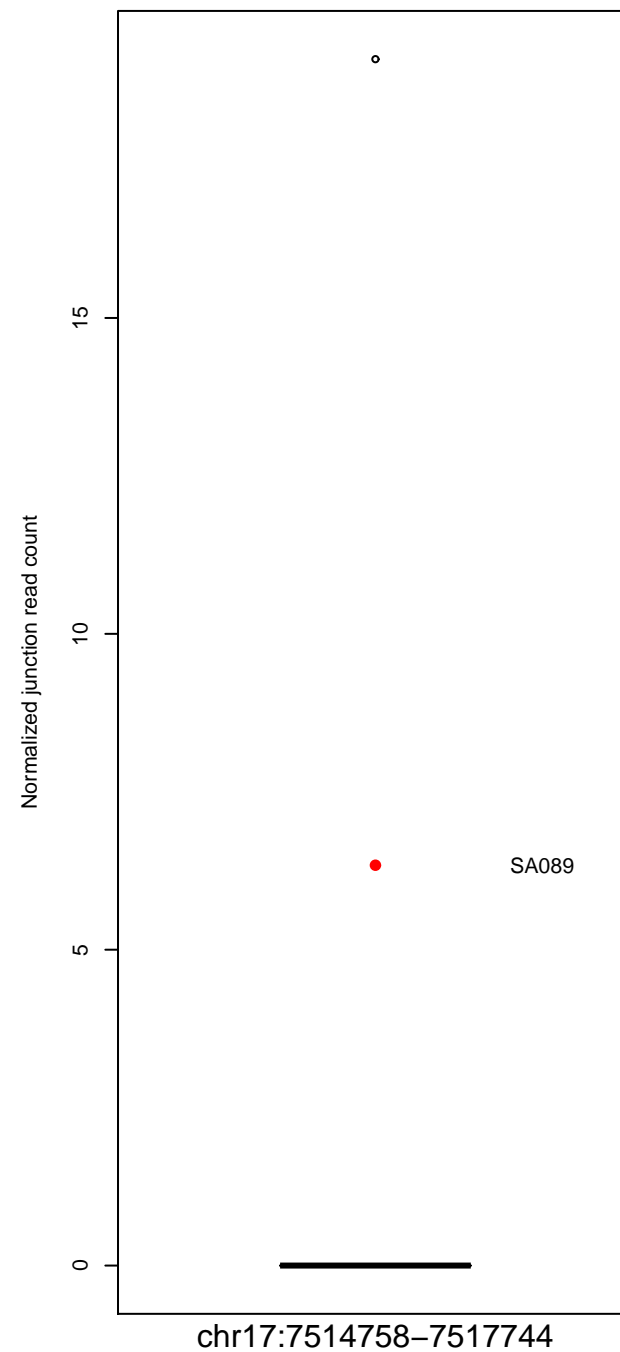

Canonical Junction

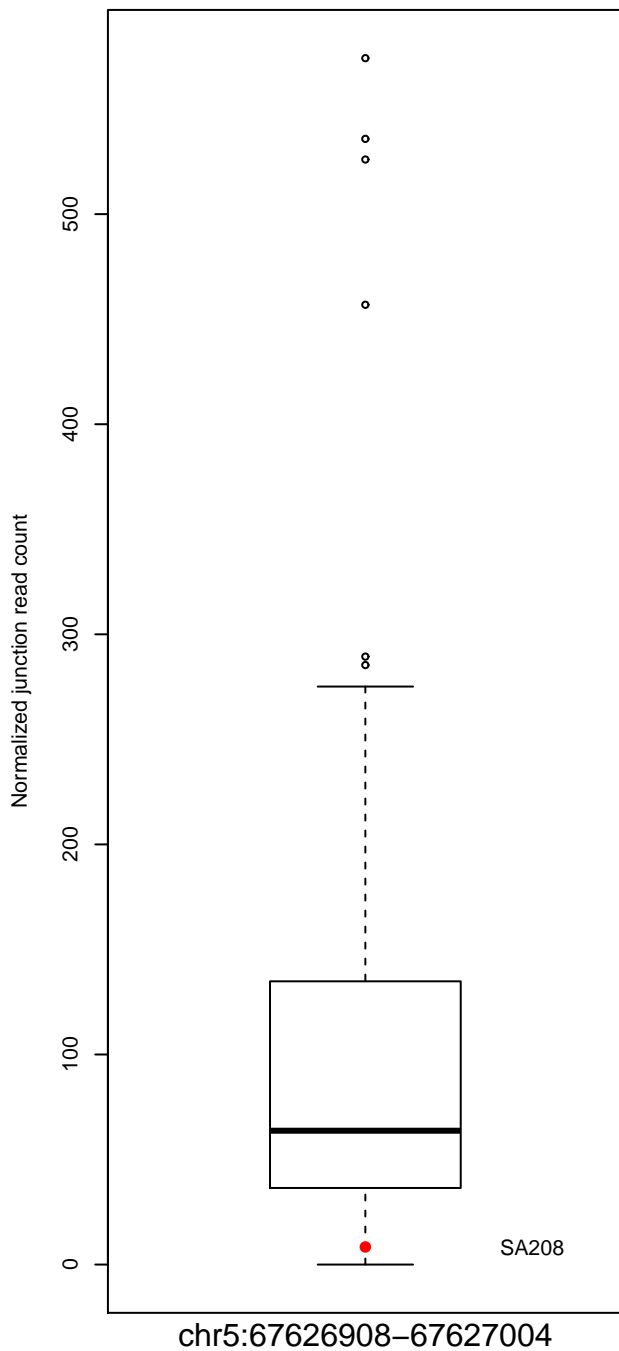

SA208, mutation chr5:67627003 gene PIK3R1  
Alternative Junction 1

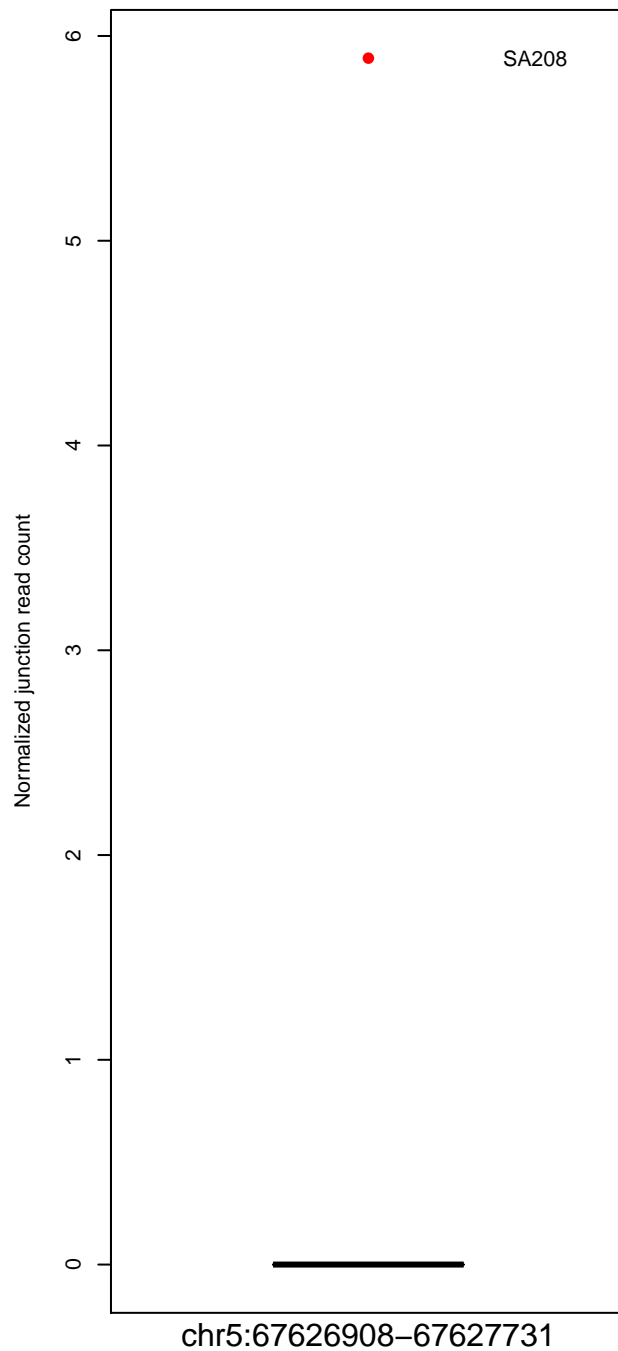

Alternative Junction 2

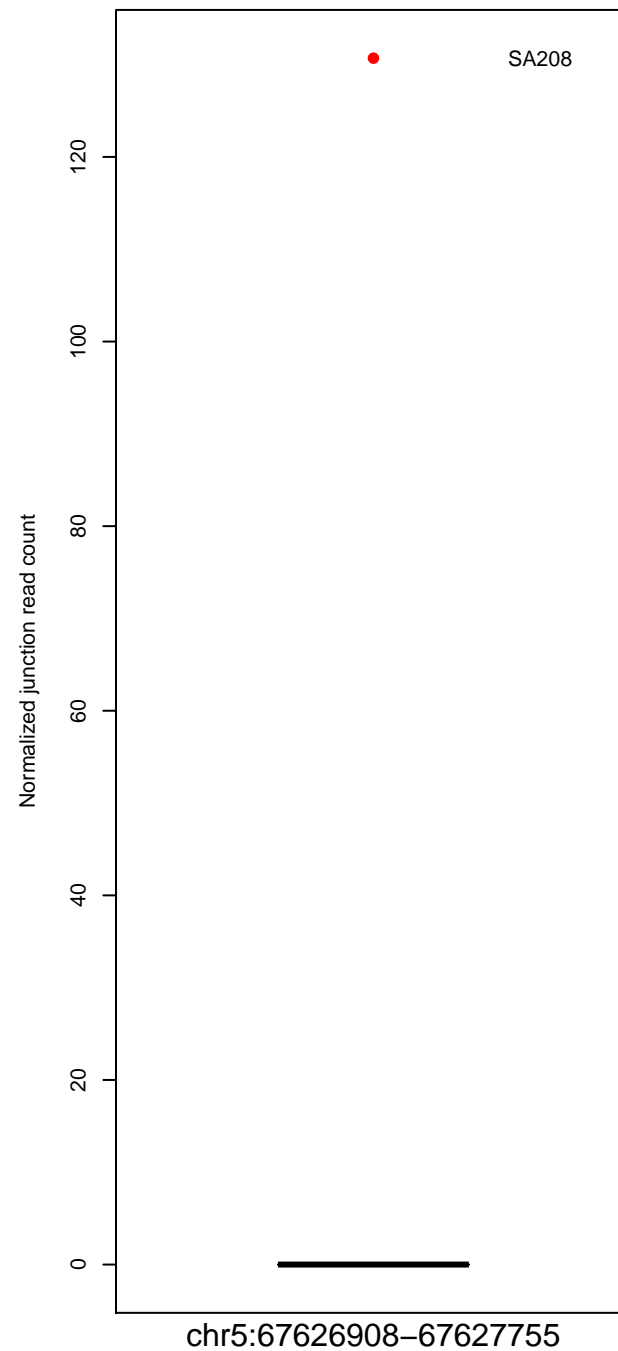

# SA097, mutation chr6:129517341 gene LAMA2

## Canonical Junction

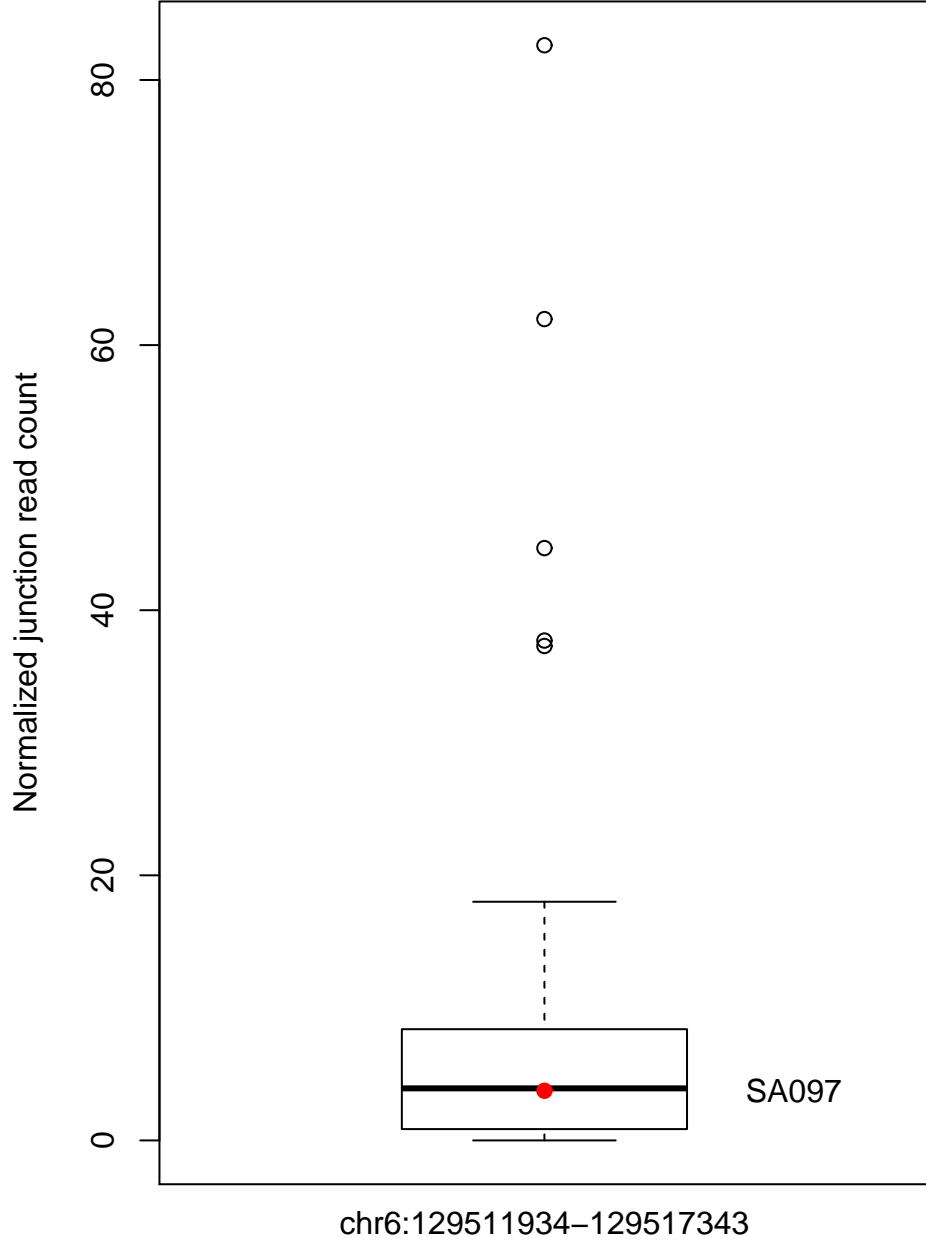

## Alternative Junction

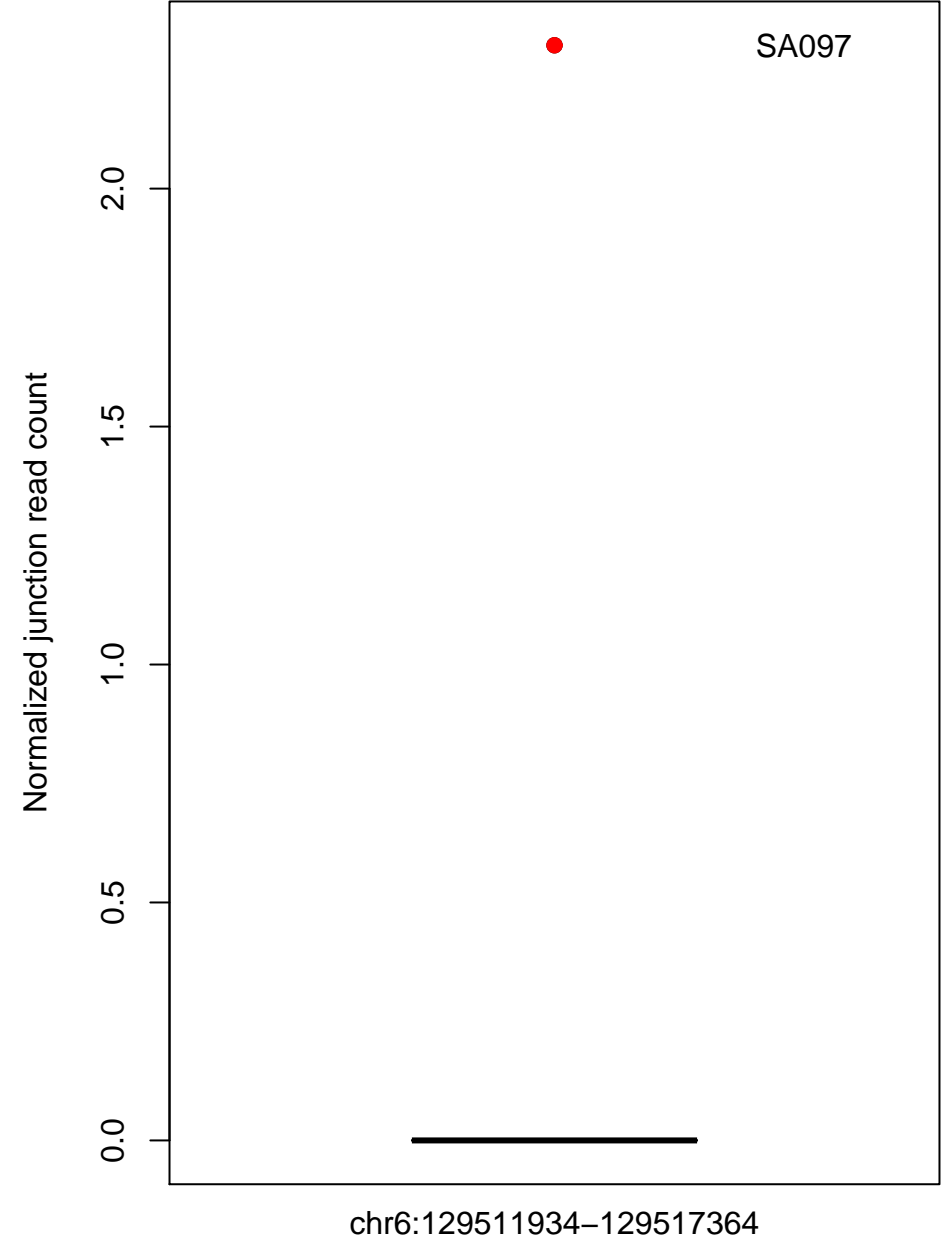

# SA210, mutation chr7:107356887 gene LAMB1

## Canonical Junction

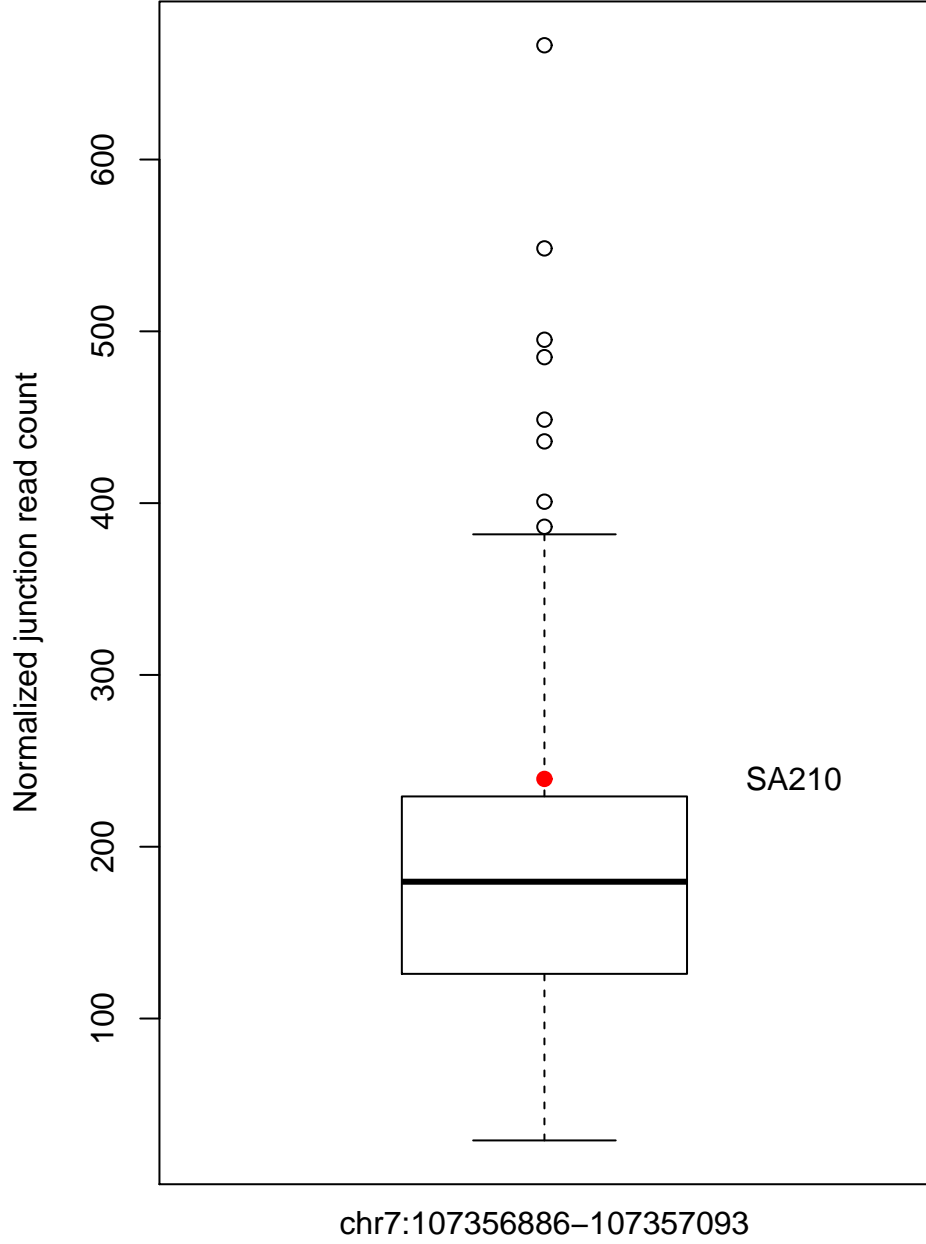

## Alternative Junction

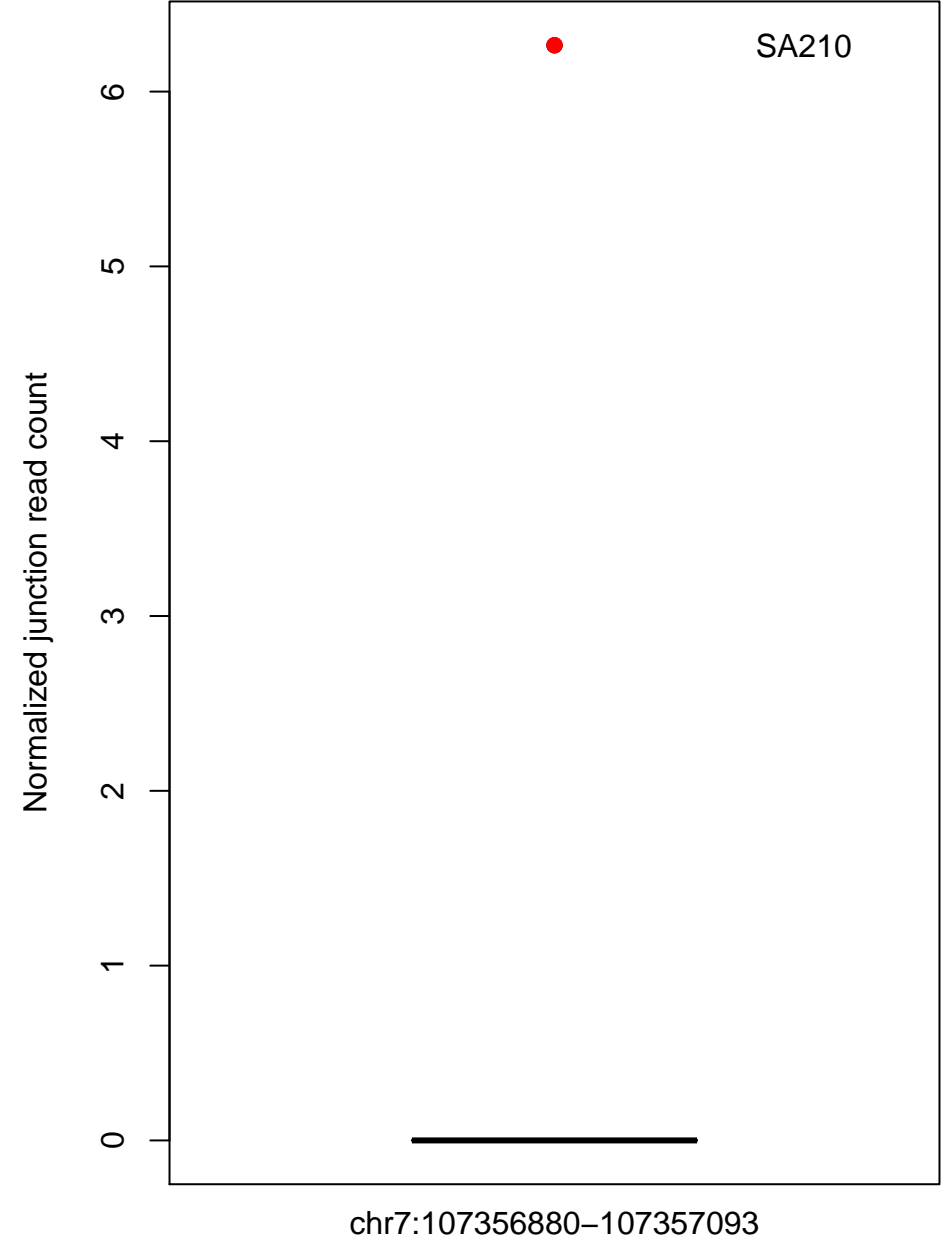

Figure S7

Location of the variation in the TFBS

| ID    | Hg18 chromosome | Hg18 coordinate | TFBS coordinates       | Closest gene Ensembl ID and gene name | Reference sequence       | Reference relative score | Alternative sequence     | Alternative relative score matrix | Ratio of relative score |     |
|-------|-----------------|-----------------|------------------------|---------------------------------------|--------------------------|--------------------------|--------------------------|-----------------------------------|-------------------------|-----|
| SA073 | 1               | 215871678       | 215871667<br>215871681 | ENSG00000162814<br>SPATA17            | CTTTTTTCTT <b>C</b> GAC  | 80.7                     | CTTTTTTCTT <b>T</b> GAC  | 70.9                              | 0.88                    | C>T |
| SA236 | 1               | 24401404        | 24401397<br>24401411   | ENSG00000230023<br>RP11-10N16.2       | TTCTTGT <b>C</b> CAGGCC  | 83.0                     | TTCTTGT <b>G</b> CAGGCC  | 73.2                              | 0.88                    | C>G |
| SA065 | 21              | 34656187        | 34656178<br>34656192   | ENSG00000159197<br>KCNE2              | CCCTGTT <b>C</b> CACCAG  | 88.2                     | CCCTGTT <b>G</b> CACCAG  | 78.6                              | 0.89                    | C>G |
| SA065 | 19              | 48793075        | 48793064<br>48793078   | ENSG00000226763<br>SRRM5              | TGCACGCTCCT <b>C</b> TCC | 82.1                     | TGCACGCTCCT <b>G</b> TCC | 73.9                              | 0.90                    | C>G |
| SA065 | 19              | 15390963        | 15390957<br>15390971   | ENSG00000246896<br>AC020911.1         | TGAGAG <b>G</b> CCCCGCTT | 82.9                     | TGAGAG <b>G</b> CCCCGCTT | 75.2                              | 0.91                    | C>G |
| SA237 | 5               | 97673262        | 97673262<br>97673276   | ENSG00000176183<br>CH17-12M21.1       | <b>G</b> TCTTTTCTTTCTC   | 81.1                     | <b>A</b> TCTTTTCTTTCTC   | 79.1                              | 0.98                    | G>A |

Figure S8

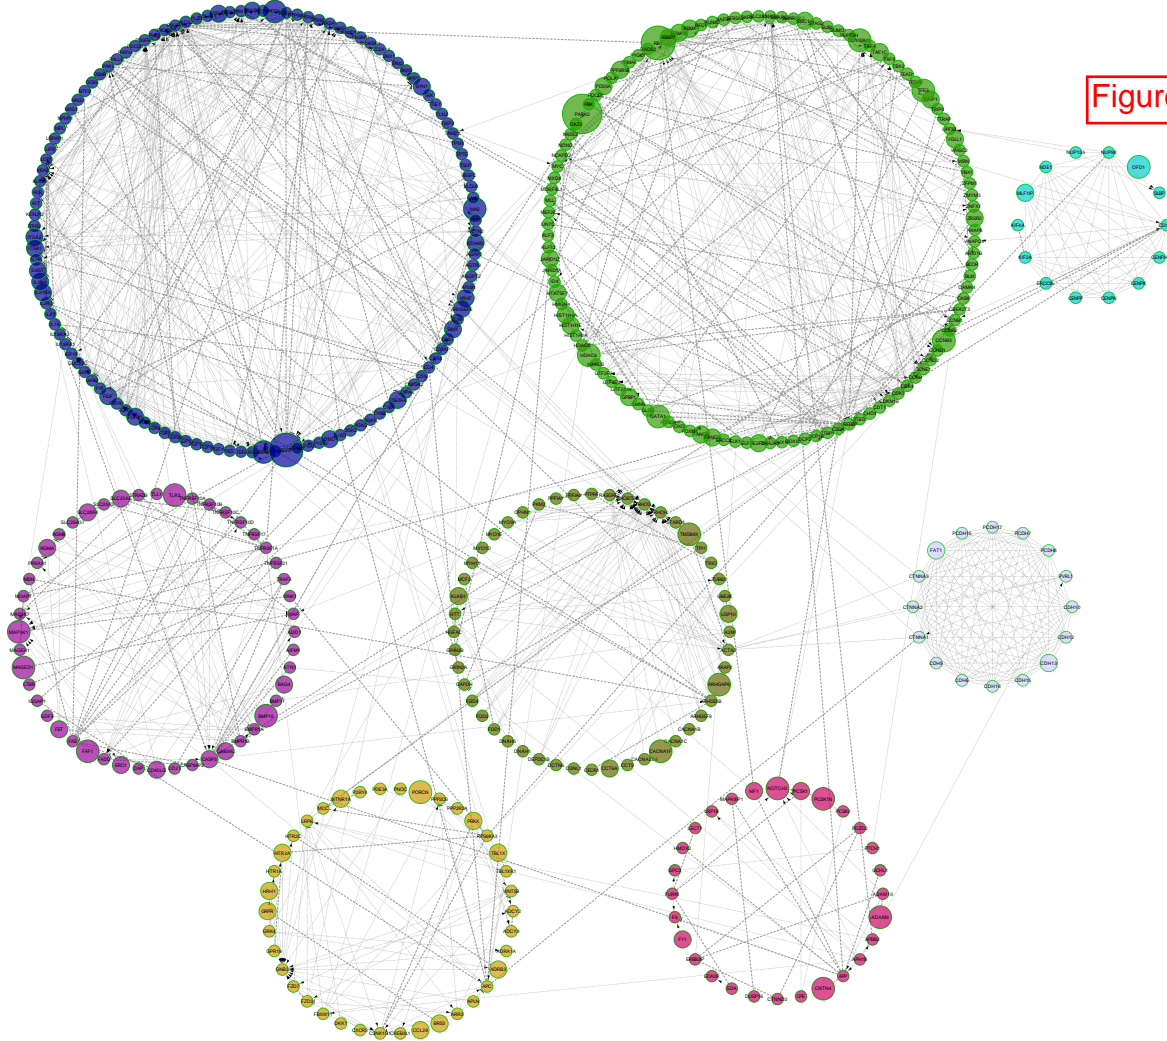



Figure S9

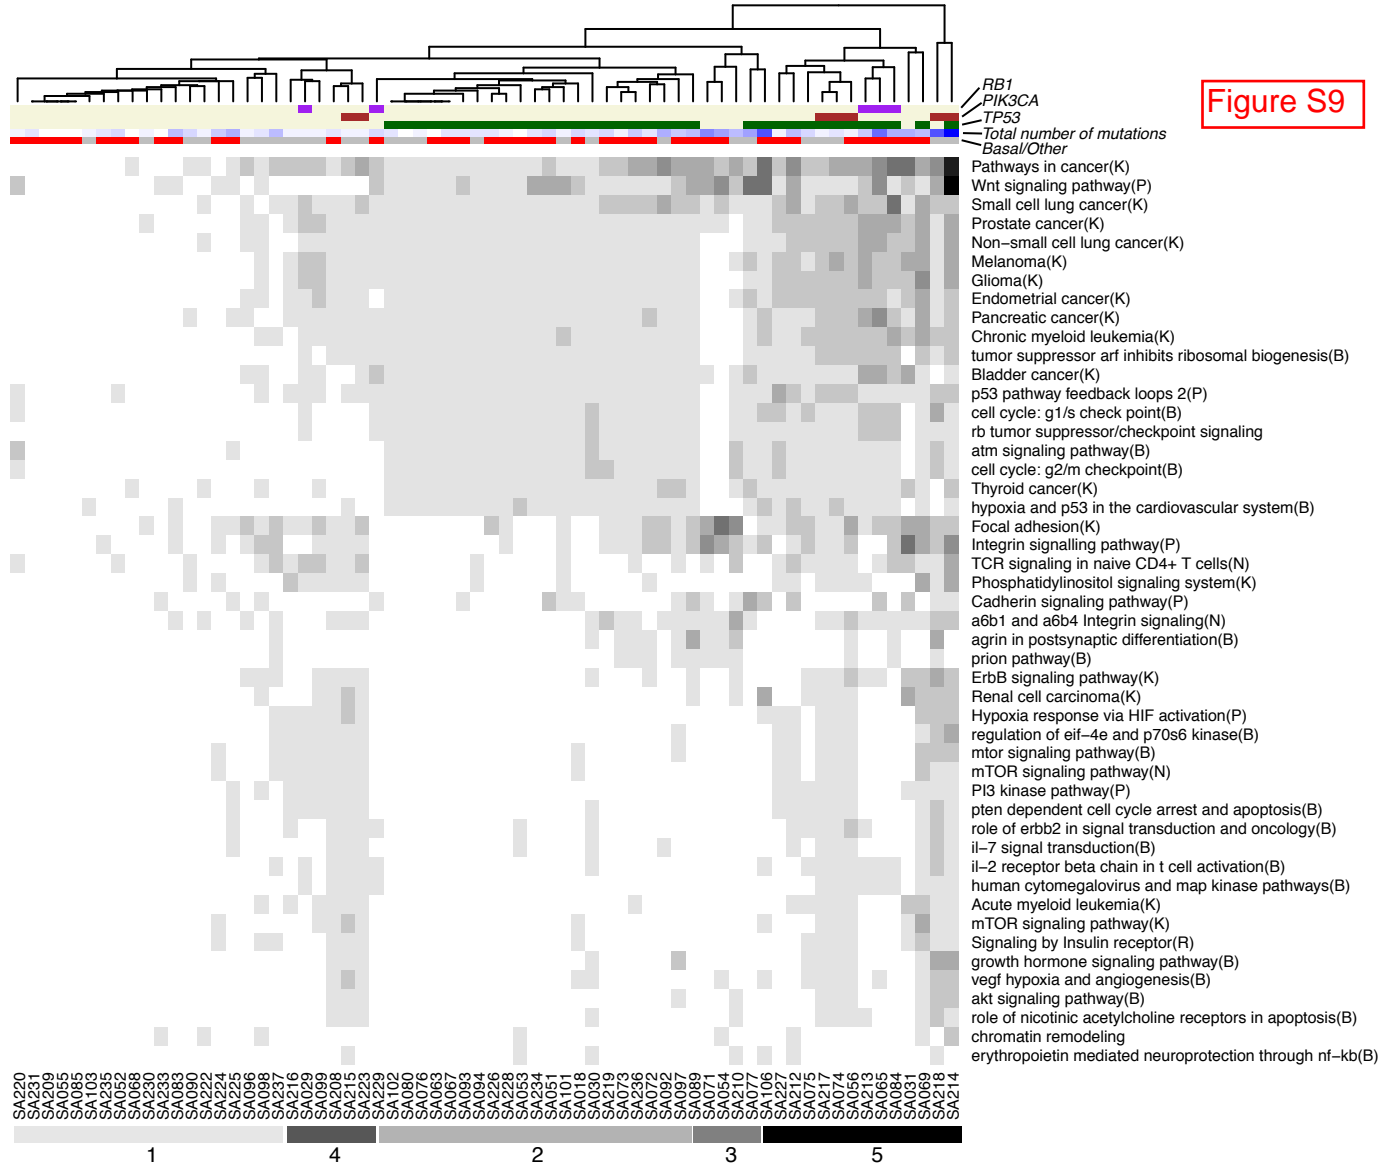

Figure S10

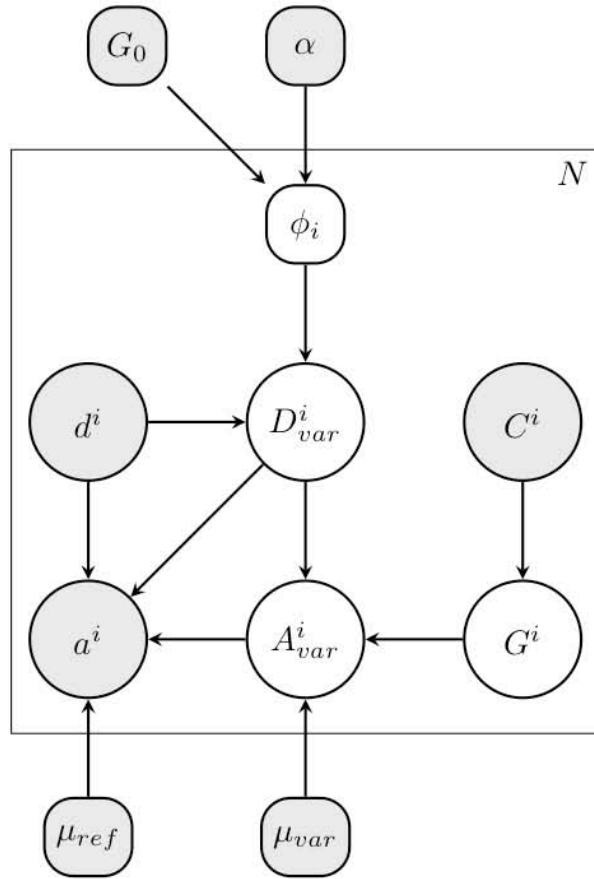

- $\phi^i \sim DP(\alpha, G_0)$
- = Clonal frequency
- $D_{var}^i | \phi^i, d^i \sim Binomial(d_{var}^i | \phi^i, d^i)$
- = Number of reads sampled from clones
- $A_{var}^i | G^i, \mu_{var}, D_{var}^i \sim Binomial(a_{var}^i | \mu_{var:cg}, d_{var}^i)$
- = Number of matches to ref from clones
- $G^i | C^i \sim Discrete Uniform(g | 1, c)$
- = Genotype of clone
- $a^i | A_{var}^i, d^i, D_{var}^i, \mu_{ref} \sim Binomial(a^i - a_{var}^i | \mu_{ref}, d^i - d_{var}^i)$
- = Number of matches to ref

SA018 n= 33

Figure S11  
108 pages

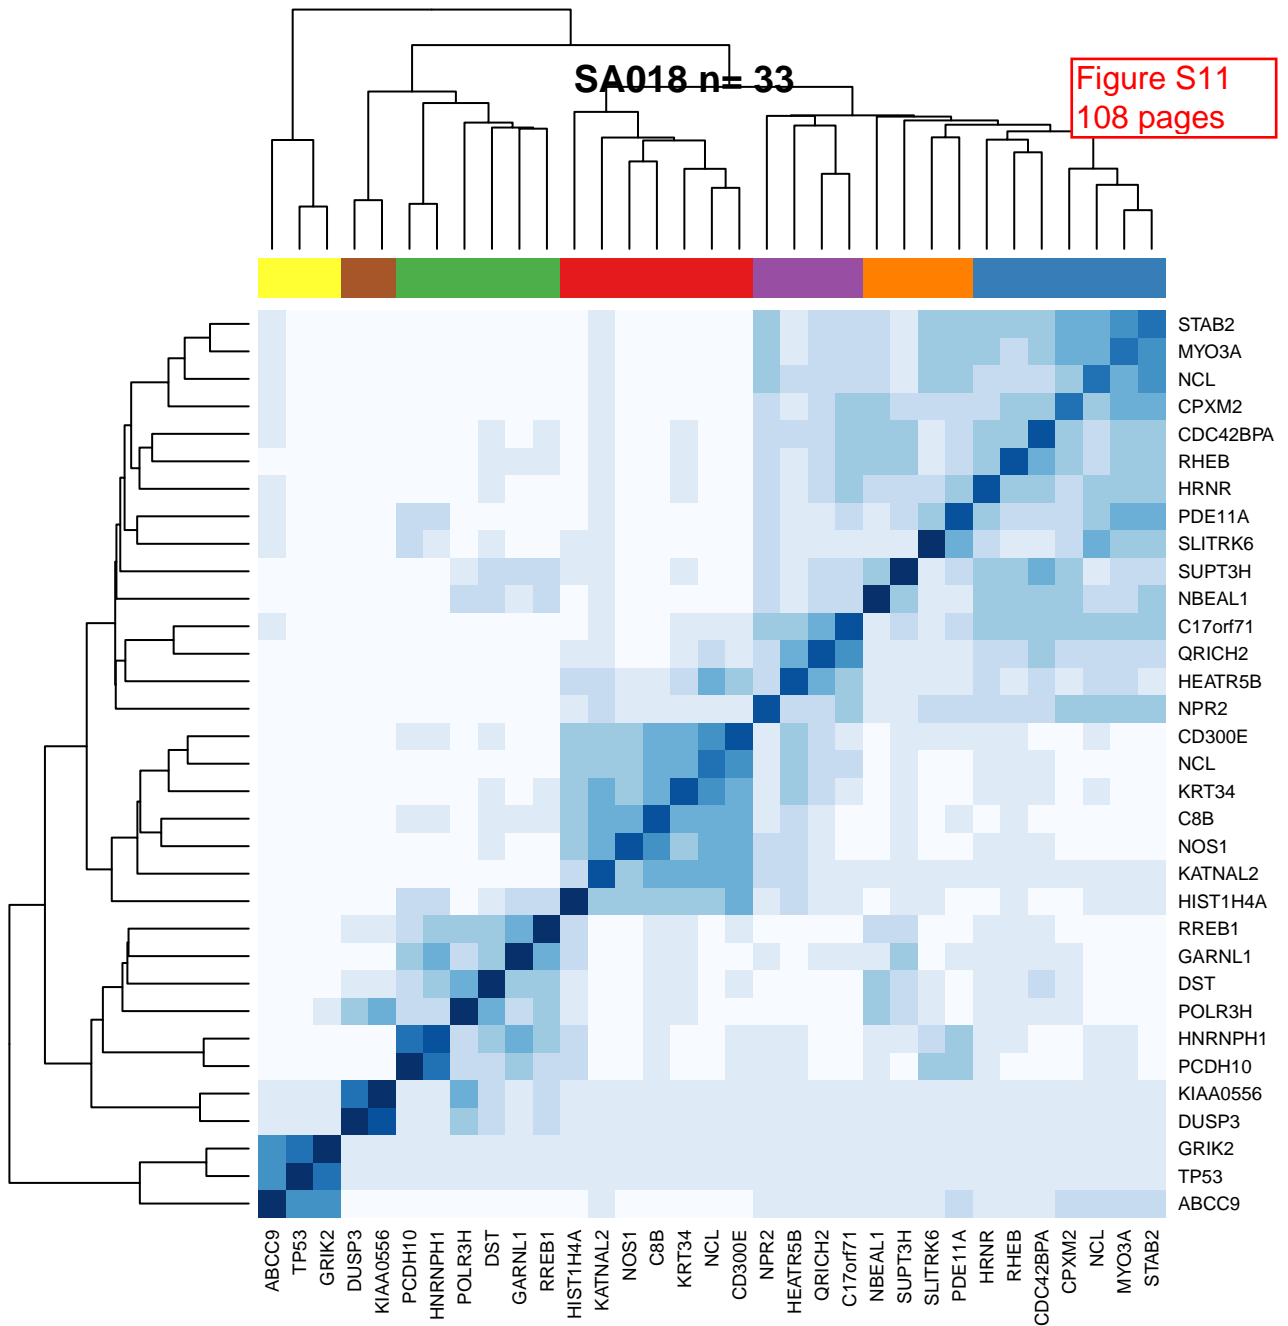

# SA018 n= 33

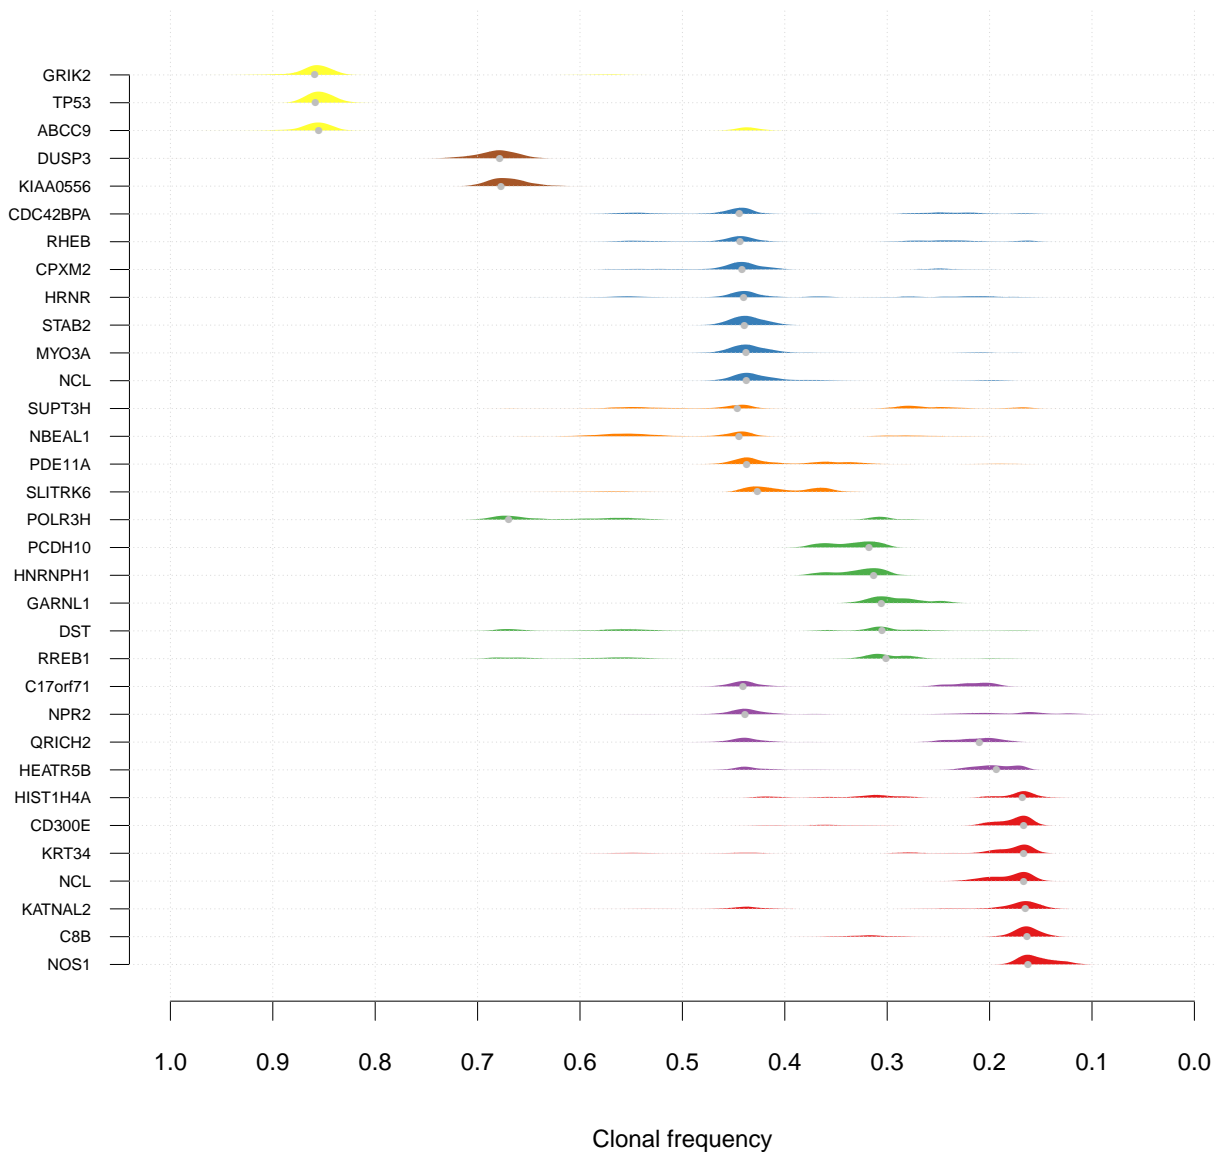



# SA029 n= 11

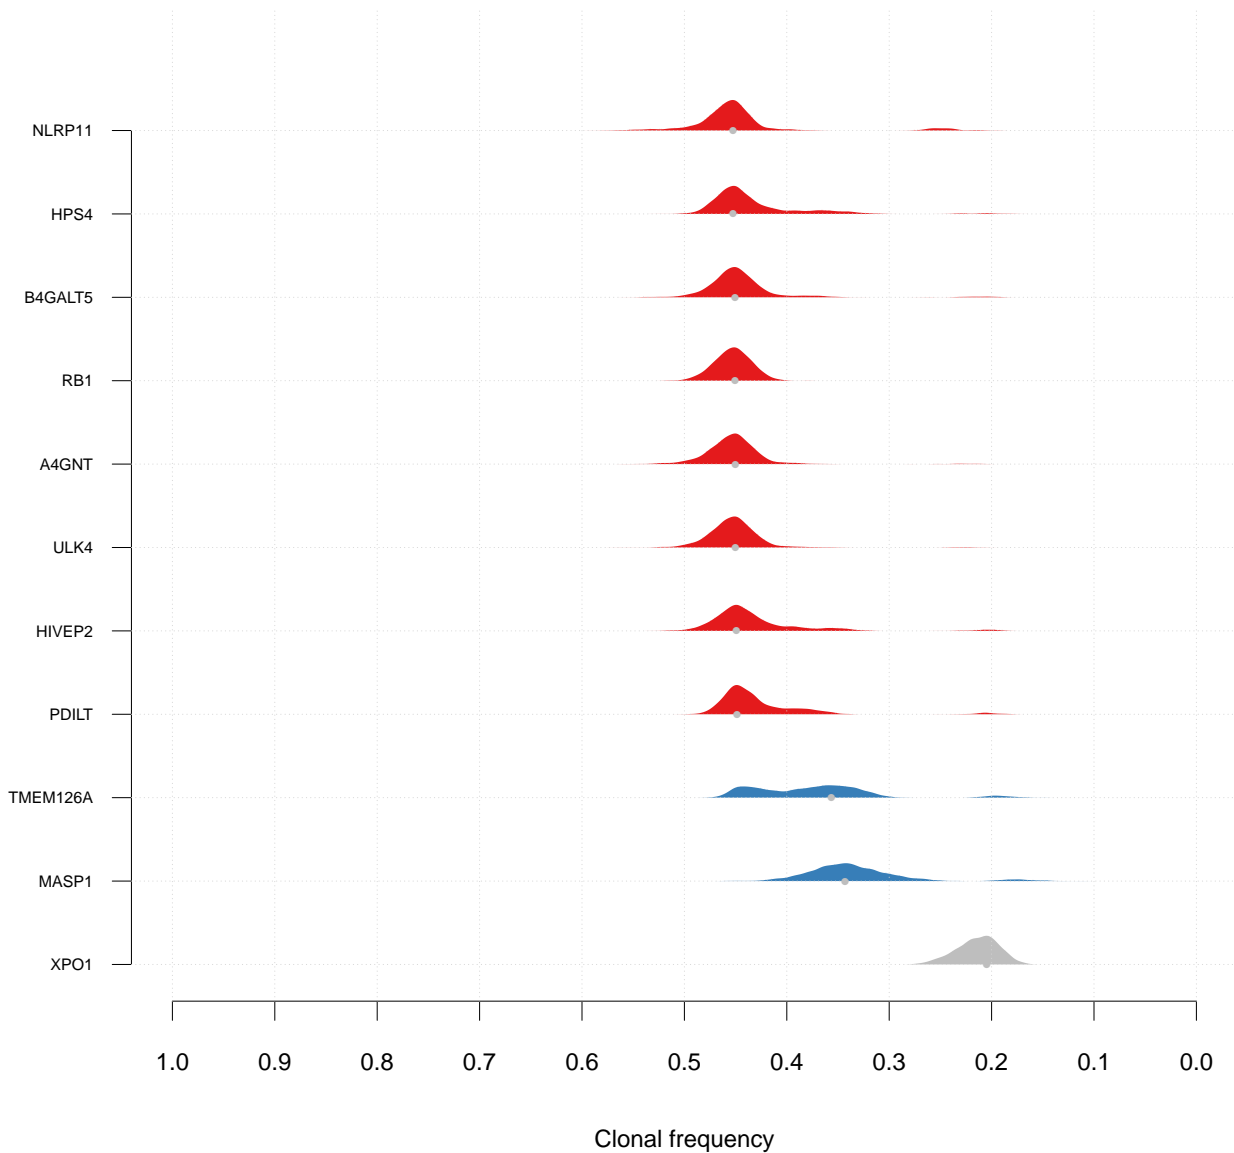

SA030  $n=22$

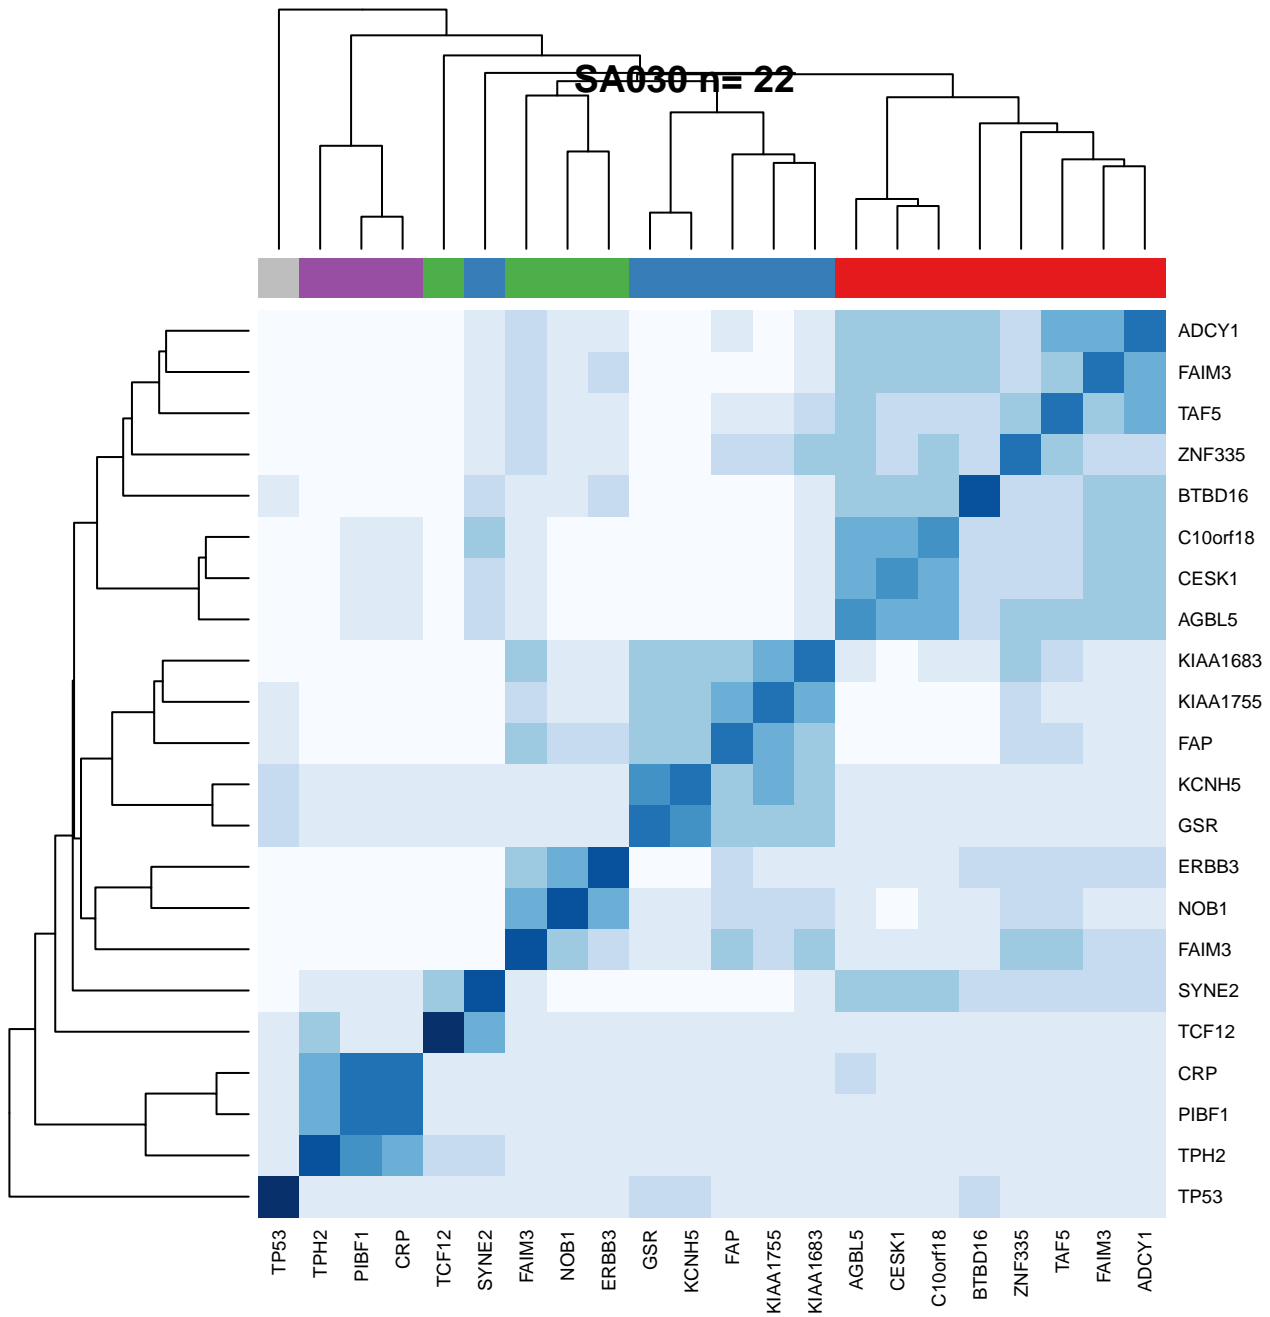

# SA030 n= 22

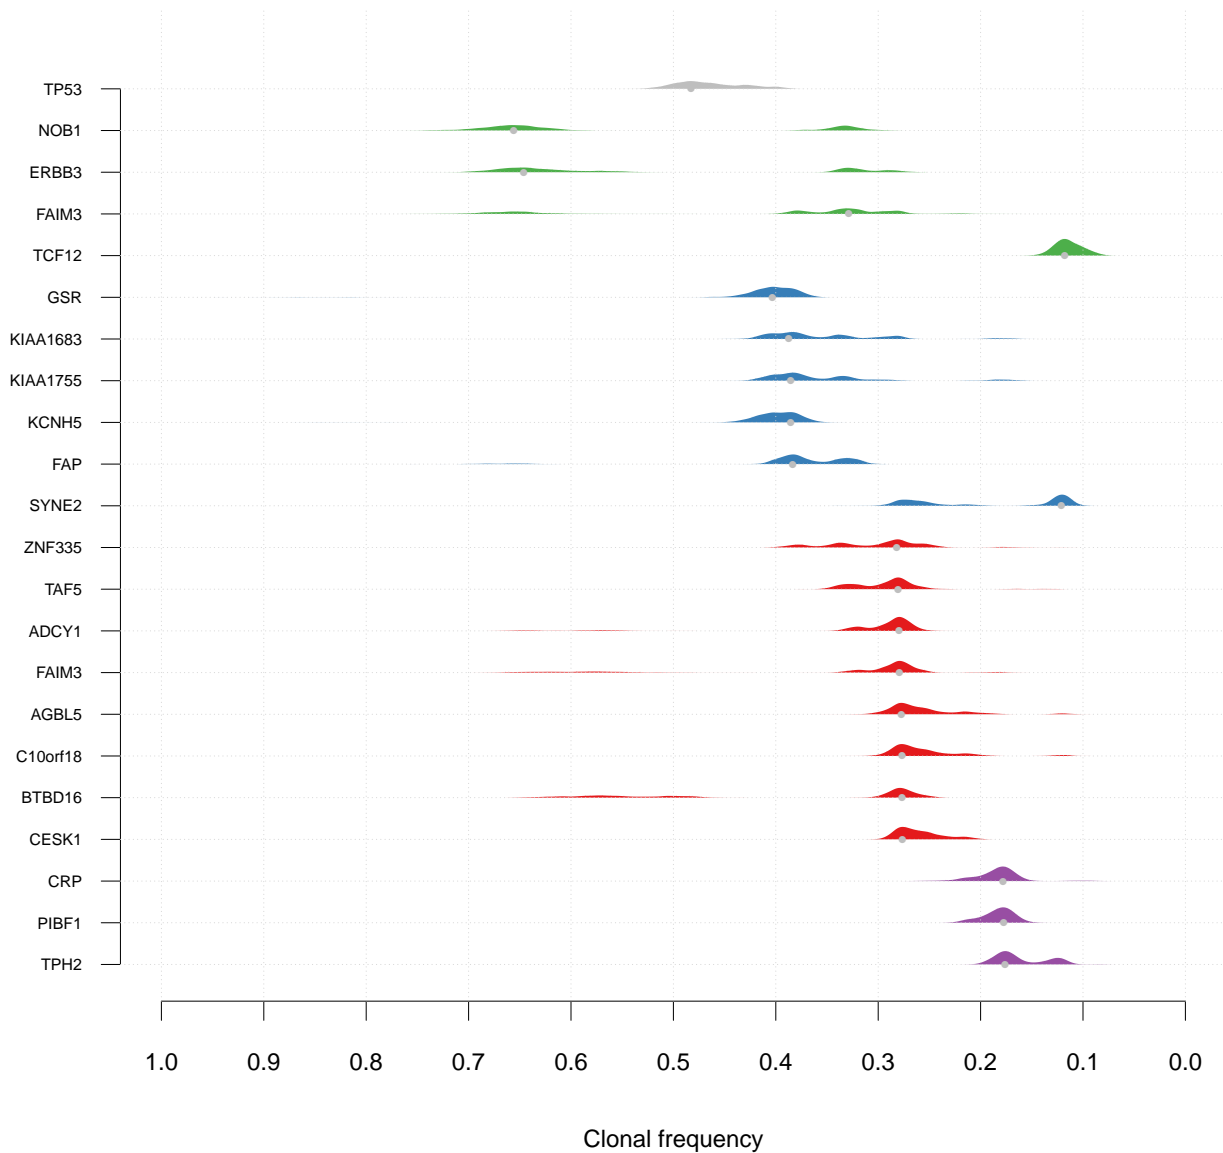



SA031 n= 60

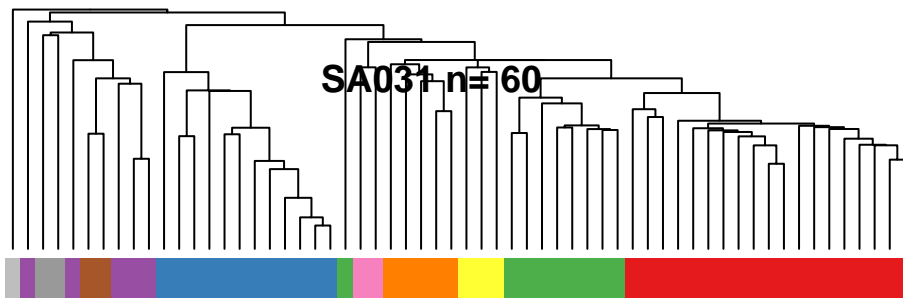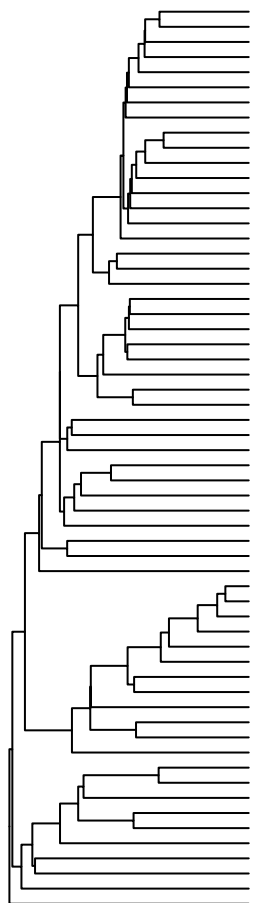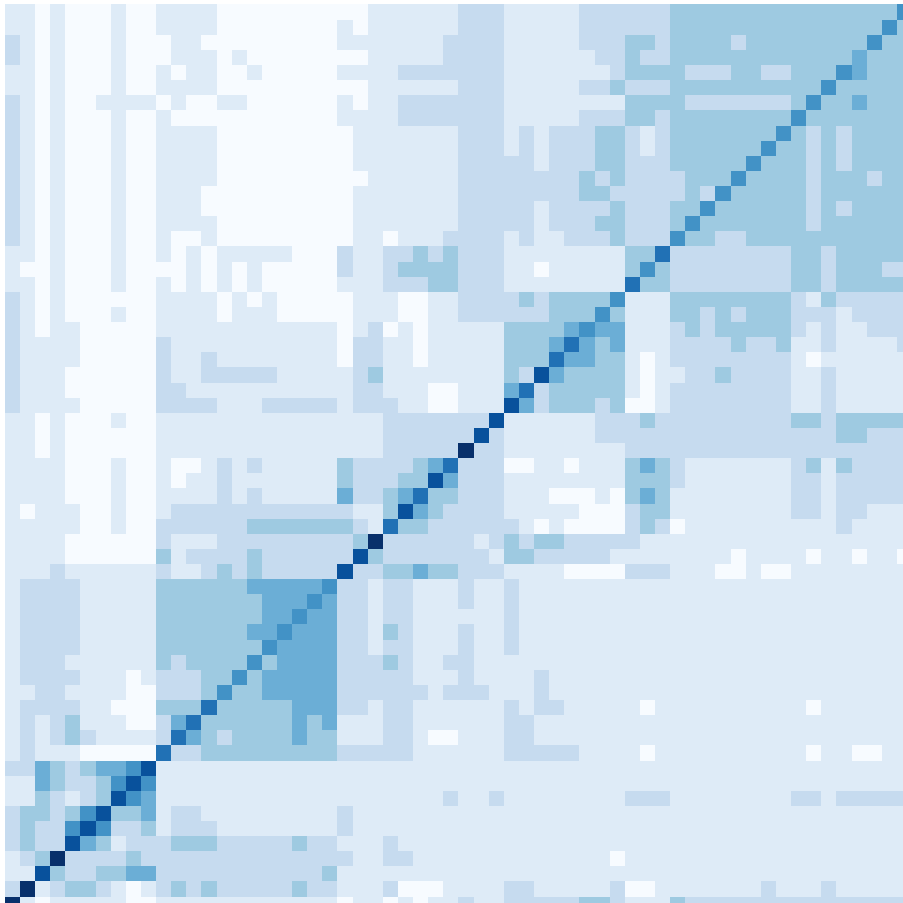

BRAF  
 DHDDS  
 MET  
 EPGN  
 GPR158  
 C16orf65  
 DAPIK1  
 ST8SIA3  
 COL4A1  
 CRHR2  
 INHBA  
 HIF3A  
 ZNF284  
 DDIT4L  
 NRAS  
 ZNF267  
 ARHGAP24  
 LANCL2  
 TUBGCP5  
 TGM3  
 KLHL32  
 ADAM12  
 CRANSEL  
 TLK2  
 RPS-1017O19.1  
 FHOD3  
 TLCD1  
 SLC26A7  
 MMP13  
 DOCK7  
 DOCK7  
 SLC38A10  
 TP53BP1  
 FAM13C  
 DAGLB  
 CELSR1  
 DPP10  
 TAF1L  
 LHCGR  
 GPR133  
 PLEKHG3  
 PLEKHG3  
 EPHA5  
 ELMO1  
 C16orf78  
 CAMK1D  
 HABP2  
 UBE3B  
 C8orf34  
 CCDC38  
 PDE4DIP  
 SEMA6D  
 CRIM1  
 INSL6  
 TREML1  
 GPR158  
 FBN2  
 CCNDBP1

CCNDBP1  
 FRMPD2  
 GPR158  
 TREML1  
 INSL6  
 CRIM1  
 SEMA6D  
 PDE4DIP  
 CCDC38  
 C8orf34  
 UBE3B  
 HABP2  
 CAMK1D  
 C16orf78  
 ELMO1  
 EPHA5  
 RDH10  
 PLEKHG1  
 GPR133  
 PCDHB7  
 LHCGR  
 TAF1L  
 DPP10  
 CELSR1  
 DAGLB  
 FAM13C  
 TP53BP1  
 SLC38A10  
 DOCK7  
 DOCK7  
 MMP13  
 SLC26A7  
 TLCD1  
 FHOD3  
 RPS-1017O19.1  
 TLK2  
 RNASEL  
 COL22A1  
 ADAM12  
 KLHL32  
 TGM3  
 TUBGCP5  
 LANCL2  
 ARHGAP24  
 ZNF267  
 NRAS  
 DDIT4L  
 ZNF284  
 HIF3A  
 INHBA  
 CRHR2  
 COL4A1  
 ST8SIA3  
 DAPIK1  
 C16orf65  
 GDDP5  
 EPGN  
 MET  
 DHDDS  
 BRAF

# SA031 n= 60

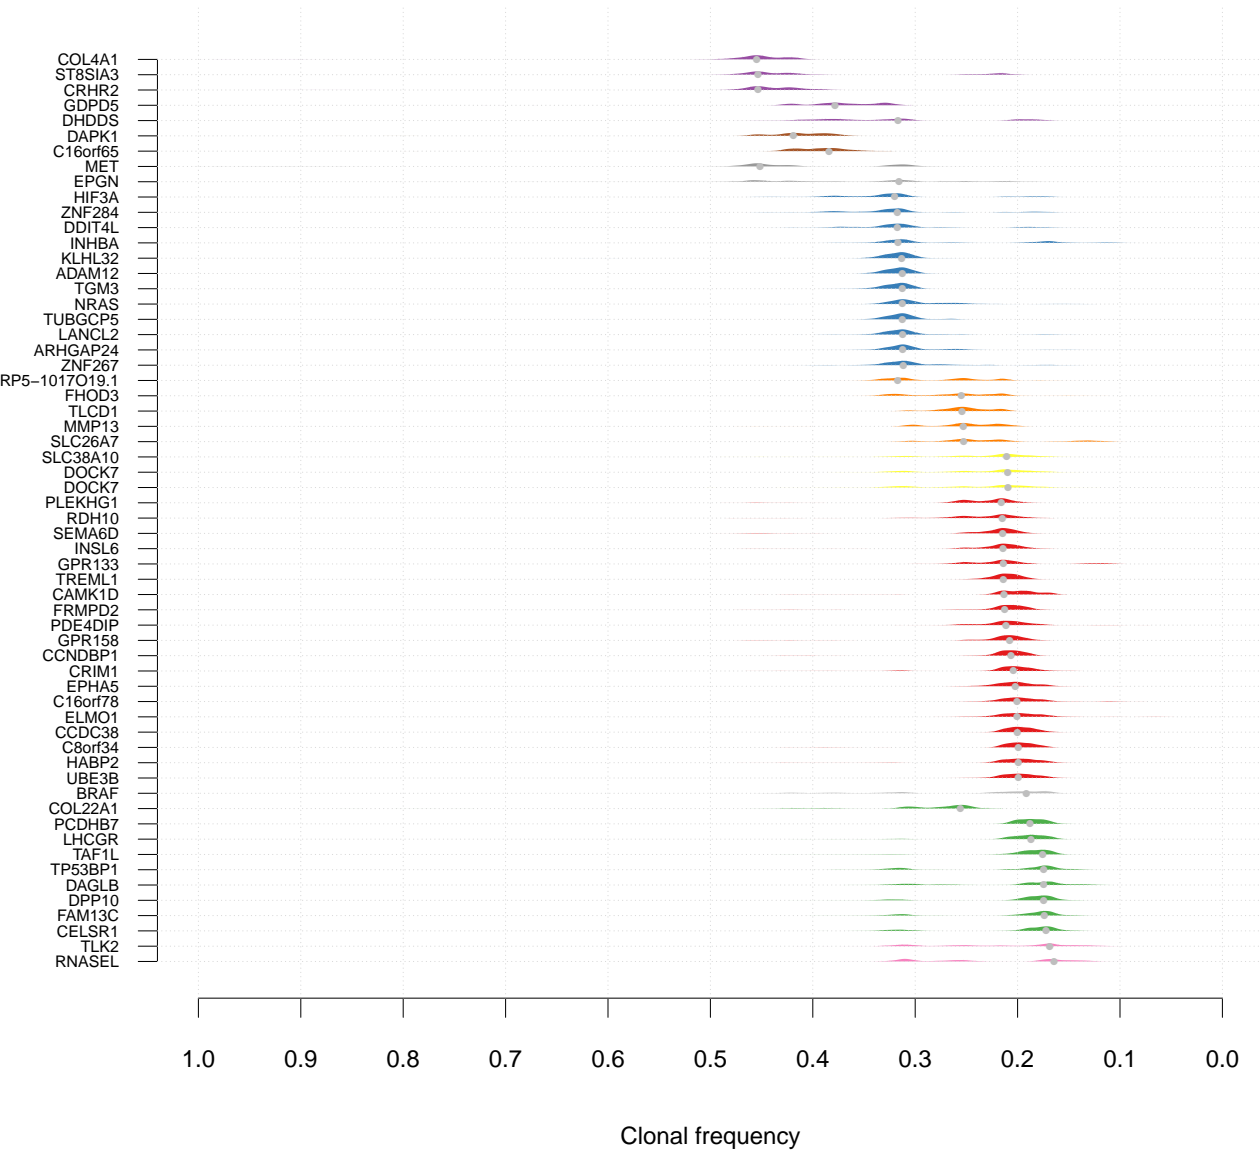

SA051 n= 34

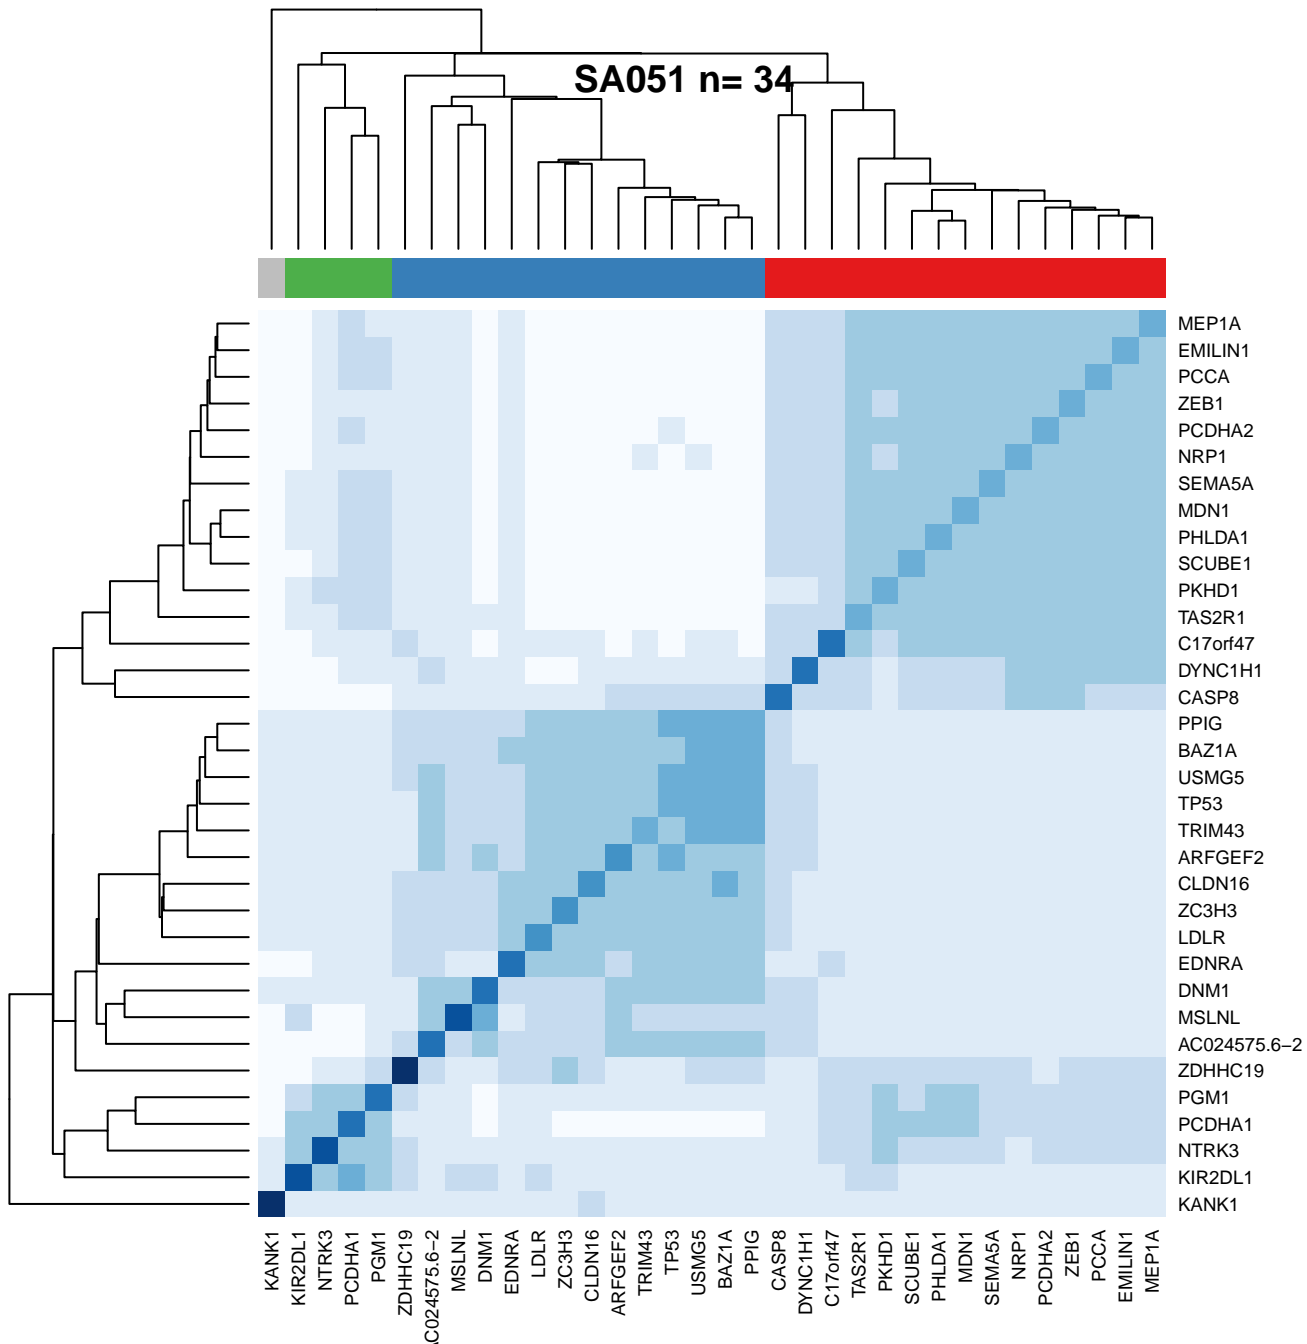

# SA051 n= 34

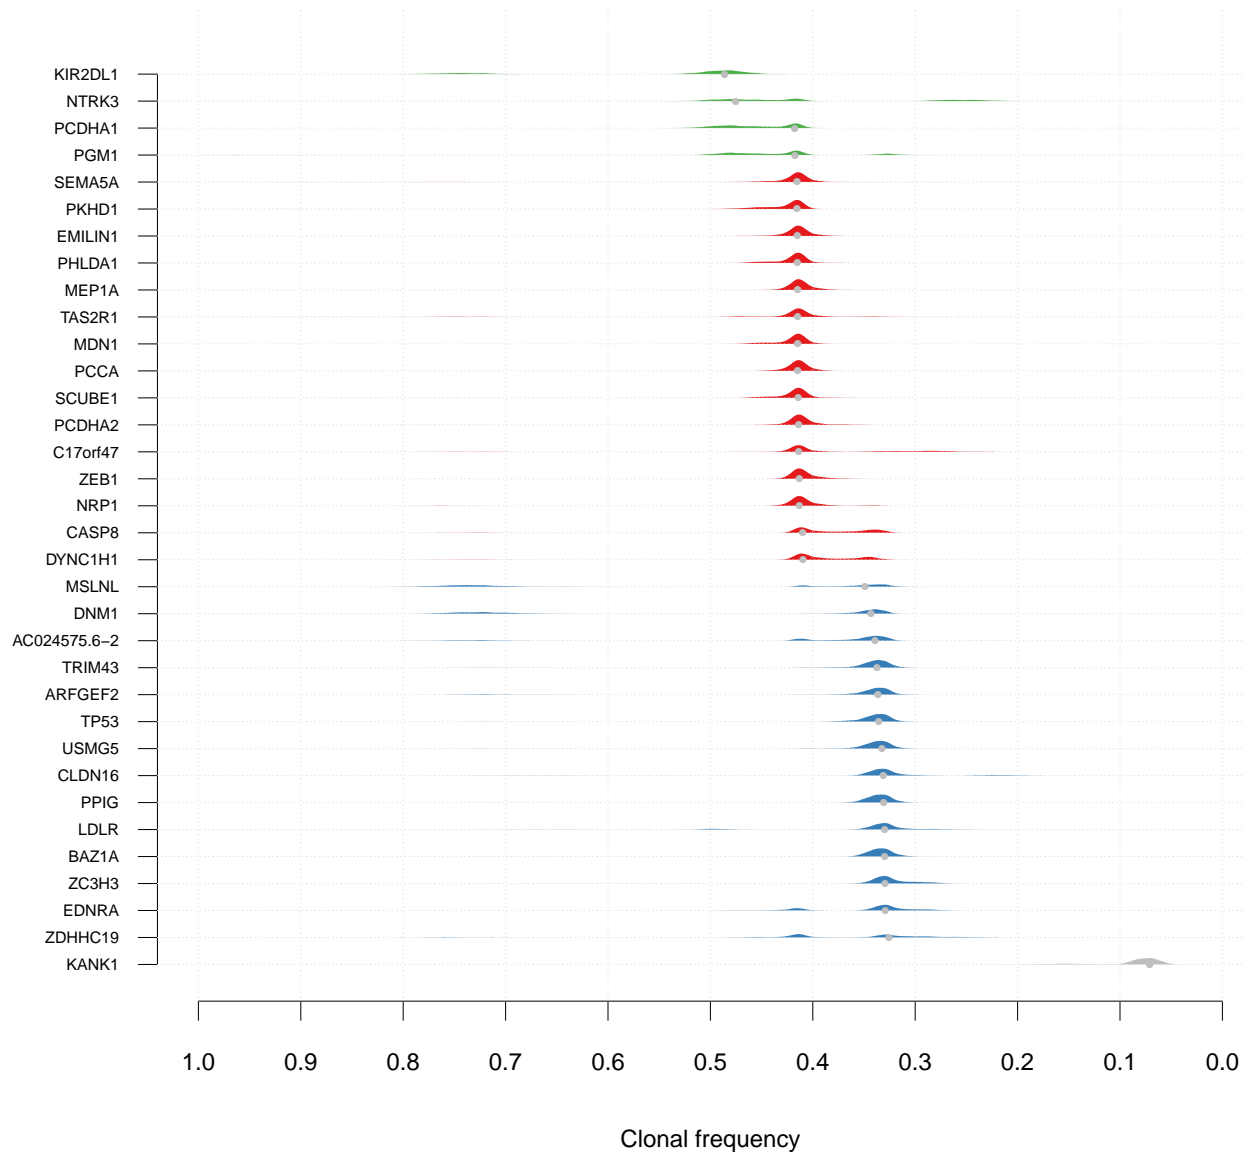

SA052 n= 25

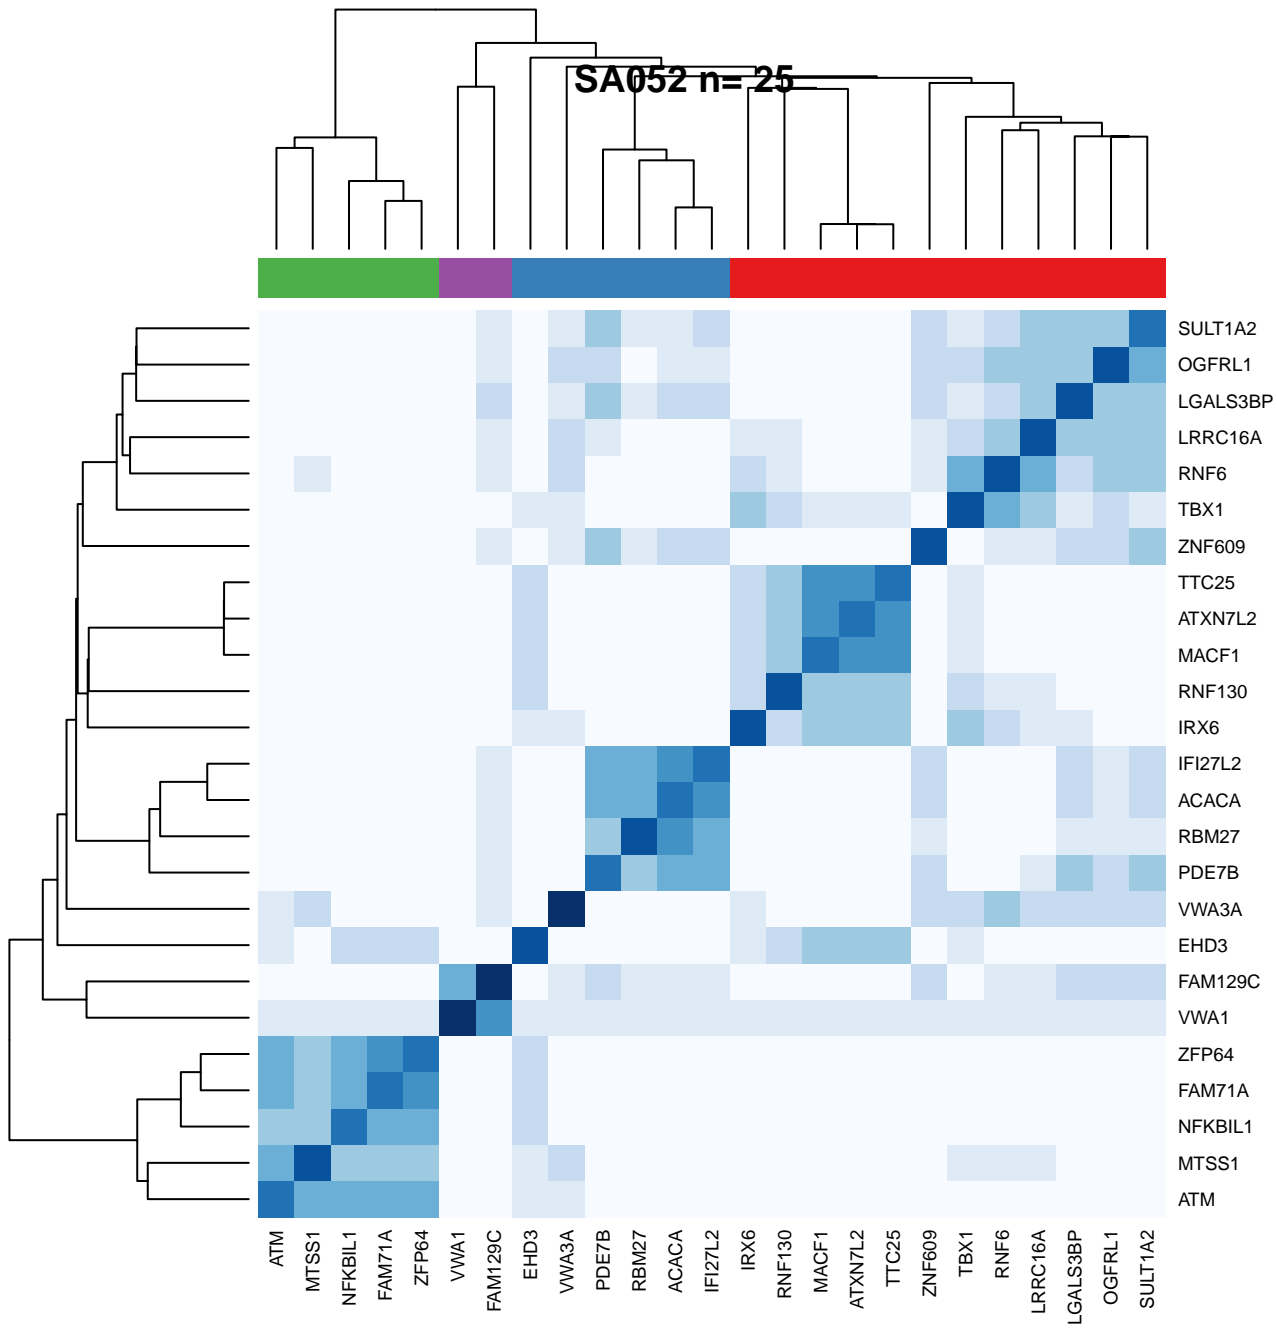

# SA052 n= 25

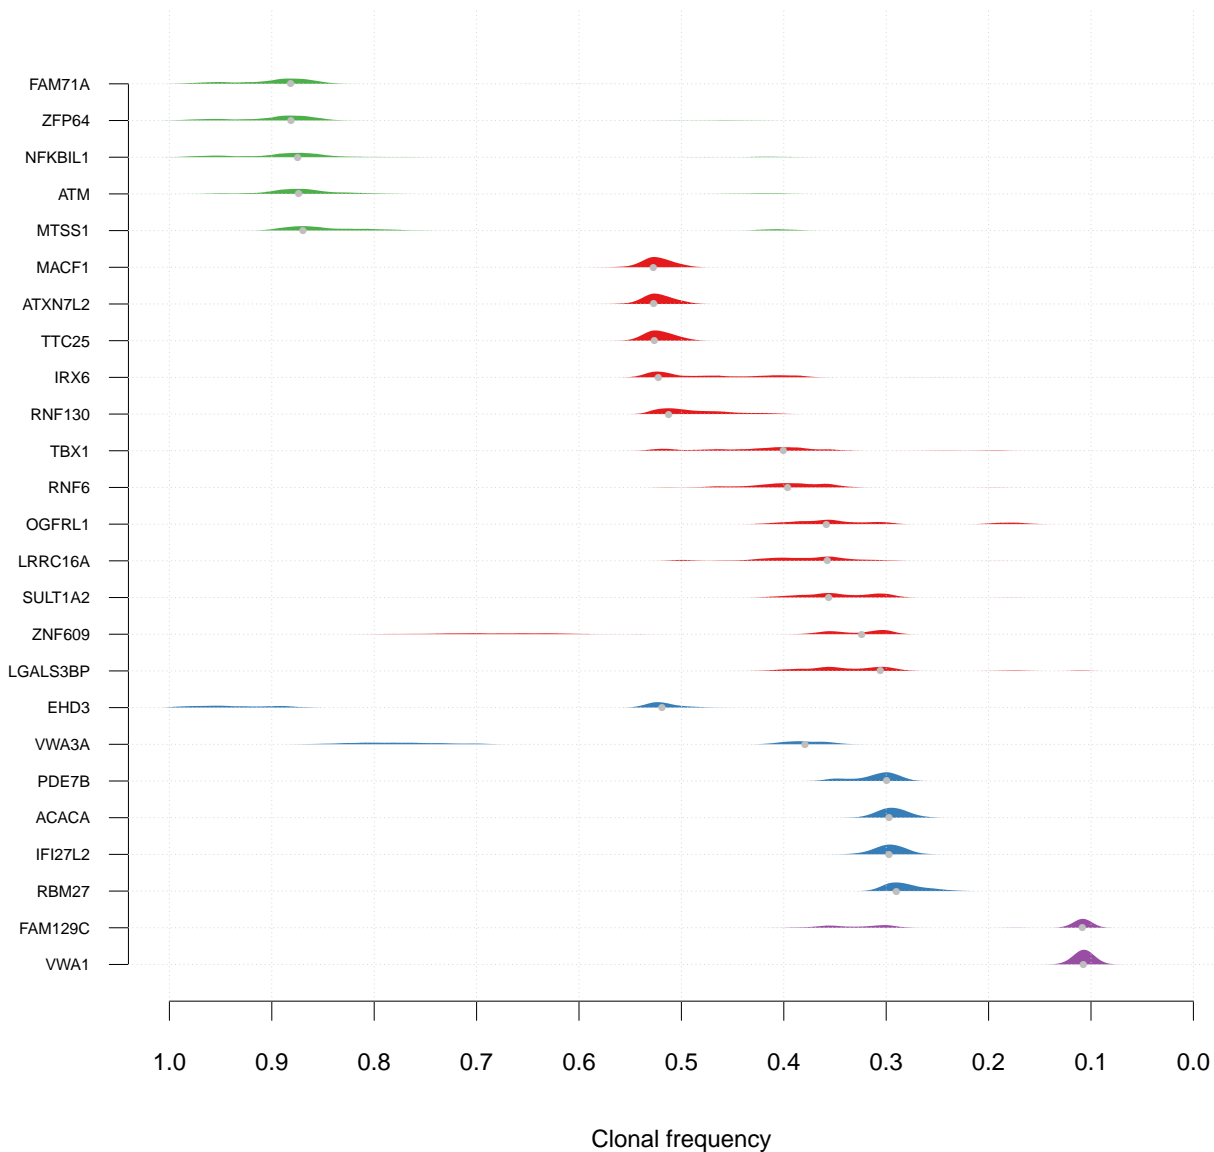

SA054 n= 70

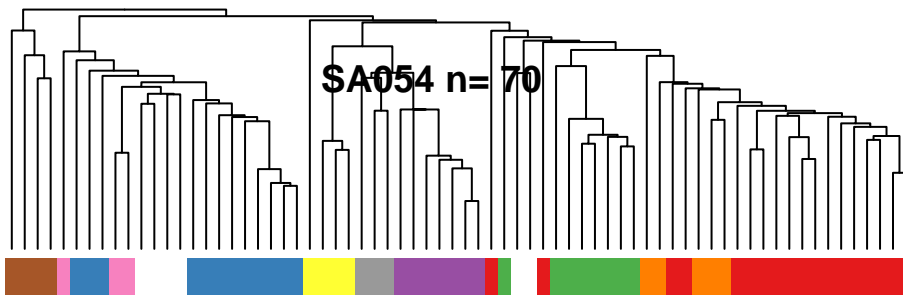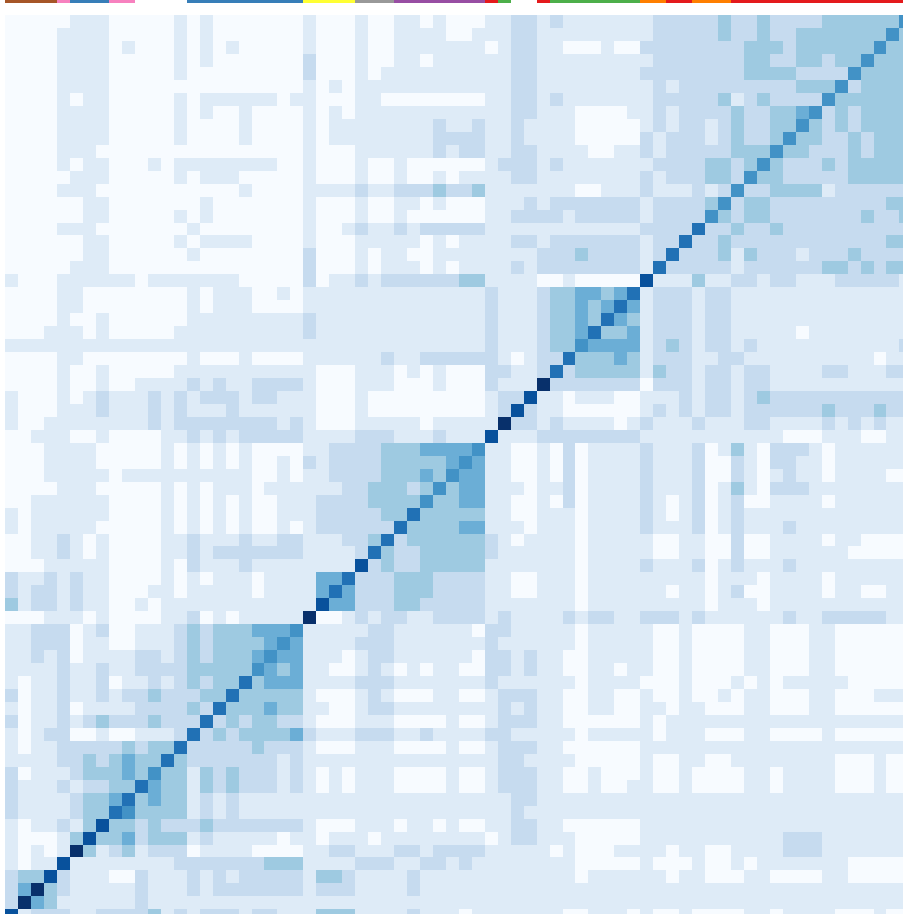

- NTRK1
- SUPV3L1
- Six4
- IQCG
- LRR6
- ASCL4
- TMEM176A
- NR3C1
- C19orf57
- MYO15A
- WNK1
- TNR
- POT1
- STX2
- SIFN5
- OR9G9
- LARP5
- SCN1A
- REV1
- MYH8
- ITGA2
- RANBP2
- COL7A1
- CCDC68
- ZFP37
- C12orf60
- BDF1
- MYH4
- ITGAE
- HIST1H1D
- PTEN
- FAM62A
- RBBP4
- EPHA5
- DMXL2
- ANKRD30A
- SIASS6
- CSRNP3
- ATP6V0B
- FLT1
- DIS3
- ZNF536
- GARNL1
- CYT5B
- C11orf63
- ATP1A2
- LAMA2
- PCN
- APOB
- CASP10
- PHF7
- FLIP1
- MIOS
- NEUROD4
- SSH1
- ATRNL1
- NKAIN1
- TRIM38
- UBR5
- POP4
- VIT
- F13A1
- CUZD1
- RELN
- PSMIC3
- SPATA16
- SHANK1
- SLC2A7
- MDN1

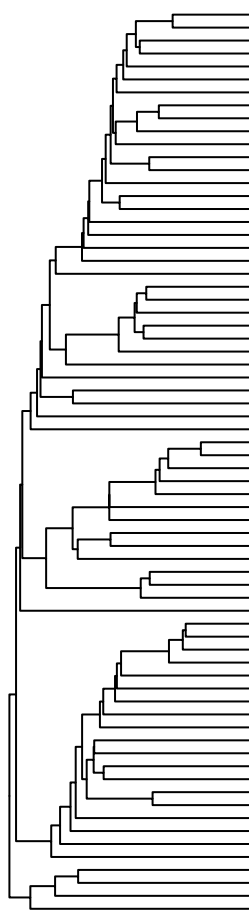

- MDN1
- SLC2A7
- SHANK1
- SPATA16
- PSMIC3
- RELN
- F13A1
- VIT
- POP4
- UBR5
- TRIM38
- NKAIN1
- ATRNL1
- SSH1
- NEUROD4
- FLIP1
- PHF7
- CASP10
- APOB
- PCN
- LAMA2
- ATP1A2
- C11orf63
- GNAS
- ZNF536
- DIS3
- FLT1
- ATP6V0B
- CSRNP3
- ANKRD30A
- SIASS6
- DIXL2
- EPHA5
- RBBP4
- FAM62A
- HIST1H1D
- ITGAE
- MDN1
- C12orf60
- ZFP37
- CCDC68
- COL7A1
- RANBP2
- ITGA2
- MYH4
- MYH8
- SCN1A
- C19orf57
- OR9G9
- SIFN5
- POT1
- WNK1
- MYO15A
- C19orf57
- NR3C1
- ASCL4
- OR9G9
- IQCG
- Six4
- Supv3l1
- NTRK1

# SA054 n= 70

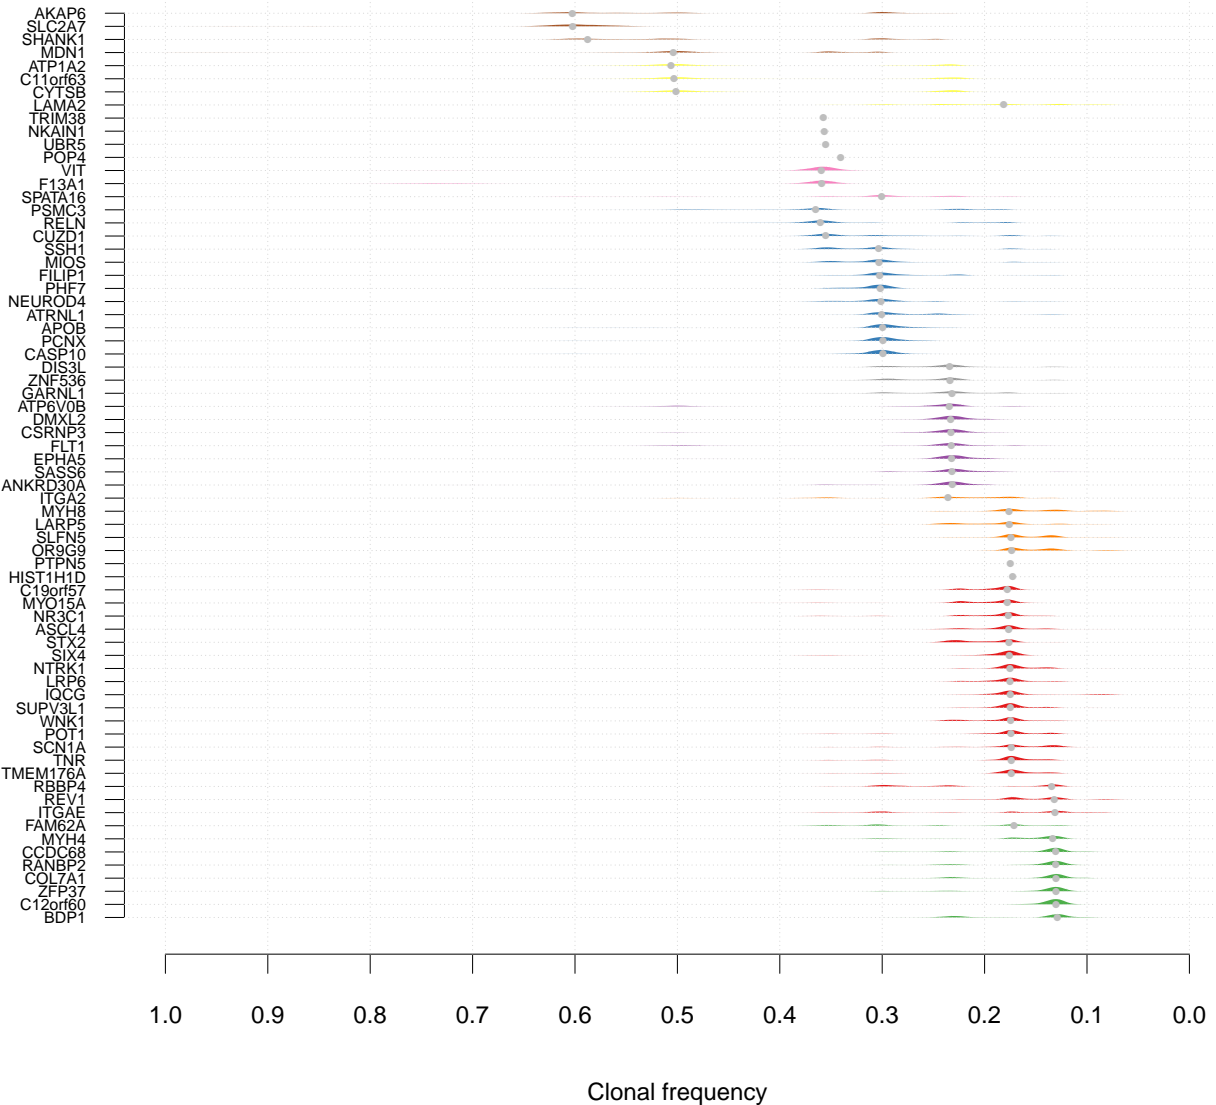





# SA056 n= 12

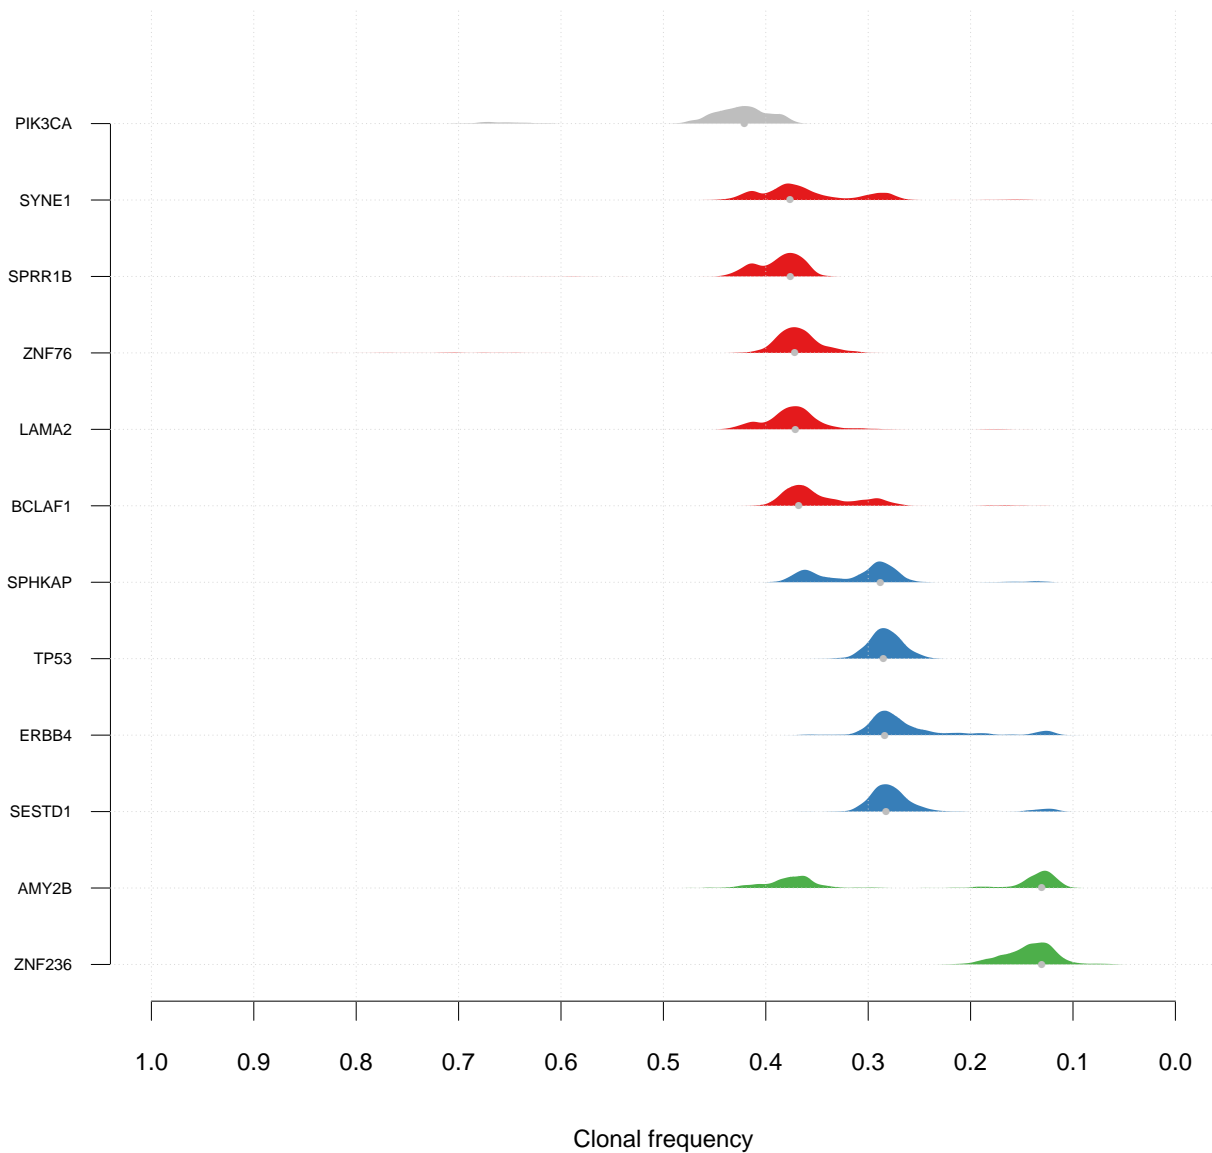

SA067 n= 21

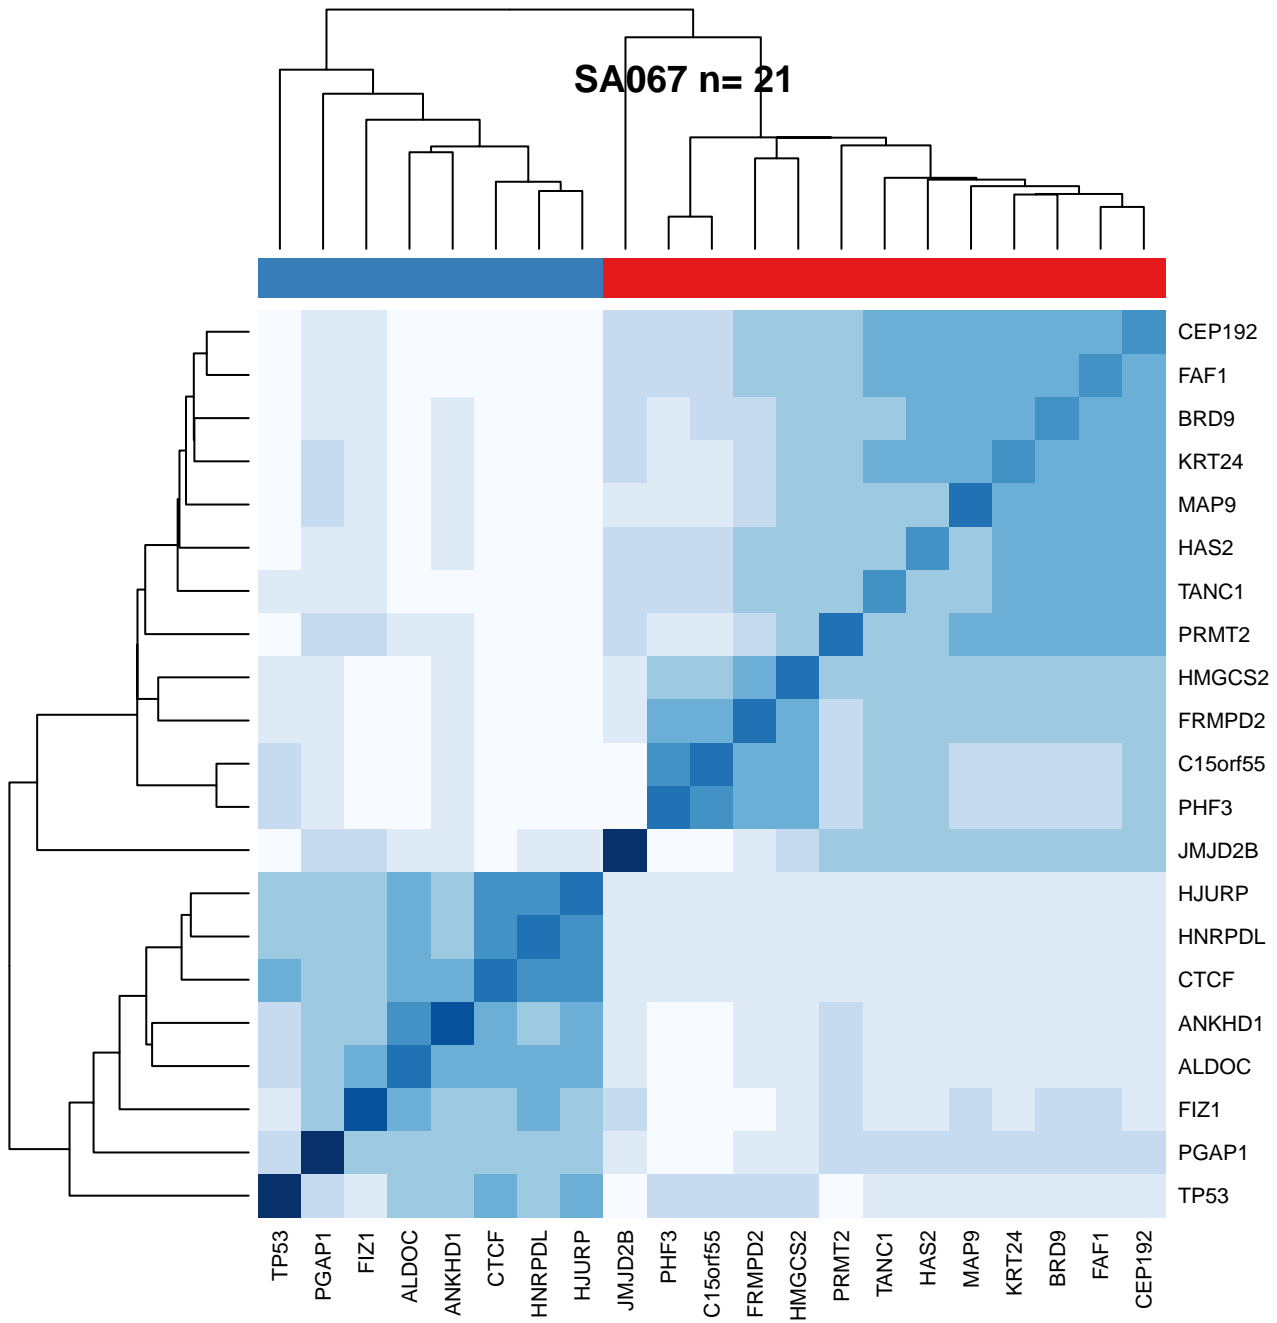

# SA067 n= 21

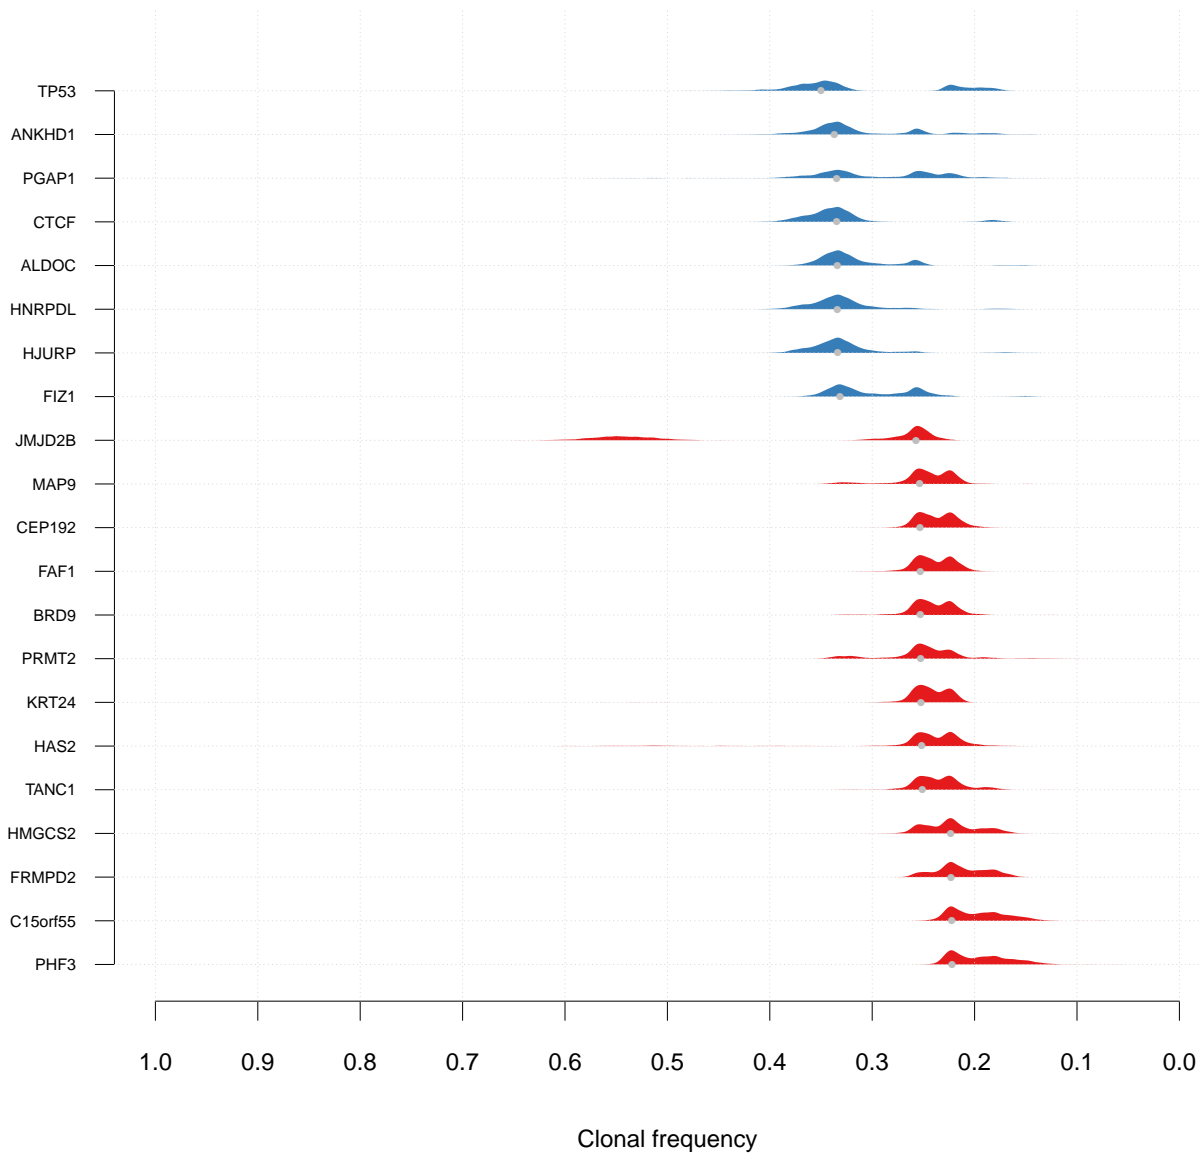

SA069 n= 54

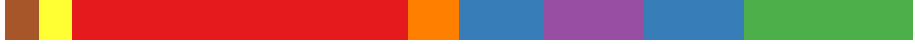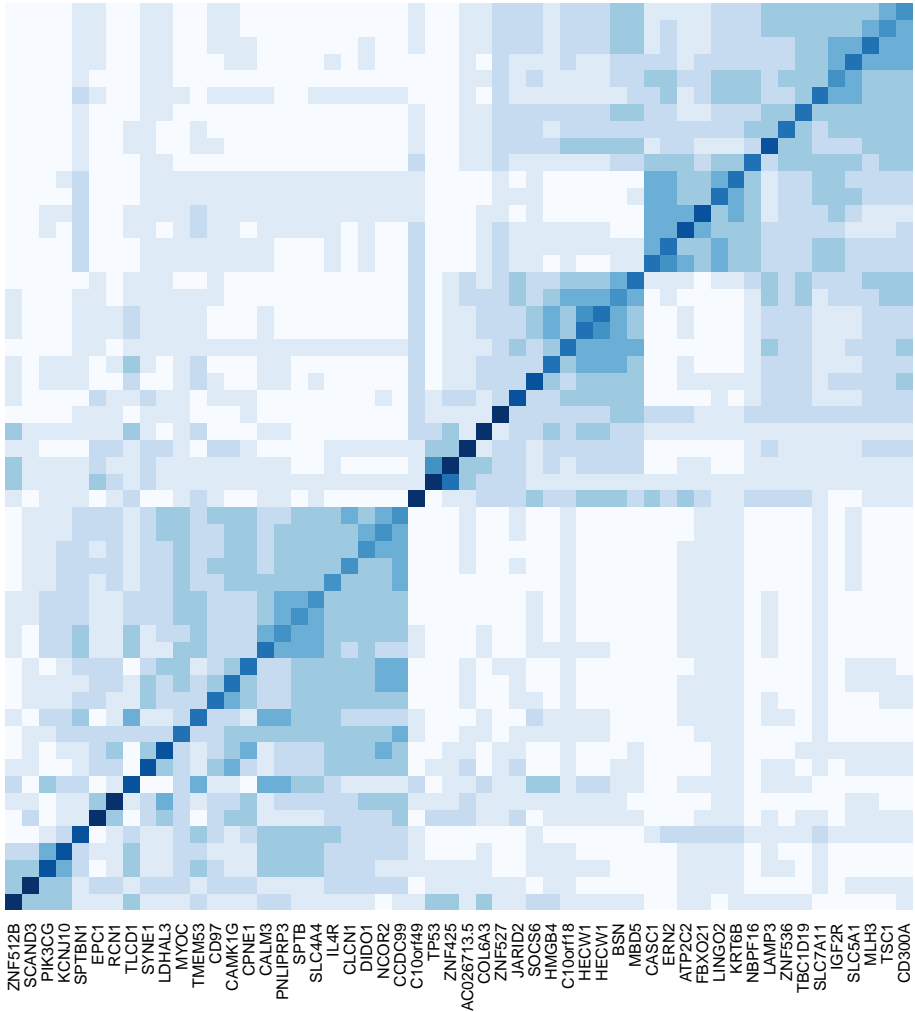

- CD300A
- TSC1
- MLH3
- SLC5A1
- IGF2R
- SLC7A11
- TBC1D19
- ZNF536
- LAMP3
- NBPFF16
- KRT6B
- LINGO2
- FBXO21
- ATP2C2
- ERN2
- CASC1
- MBD5
- BSN
- HECW1
- HECW1
- C10orf18
- HMG8A
- SOCS6
- JARID2
- ZNF527
- COL6A3
- AC026713.5
- ZNF425
- TP53
- C10orf49
- CCDC99
- NCOR2
- DIDO1
- CLCN1
- IL4R
- SLC4A4
- SPTB
- PNLIPRP3
- CALM3
- CPNE1
- CAMK1G
- CD97
- TMEM53
- MYOC
- LDHAL3
- SYNE1
- TLCD1
- RCN1
- EPC1
- SPTBN1
- KCNJ10
- PIK3CG
- SCAND3
- ZNF512B

ZNF512B

SCAND3

PIK3CG

KCNJ10

SPTBN1

EPC1

RCN1

TLCD1

SYNE1

LDHAL3

MYOC

CD97

TMEM53

CD97

CAMK1G

CPNE1

CALM3

PNLIPRP3

SPTB

SLC4A4

IL4R

CLCN1

DIDO1

NCOR2

CCDC99

C10orf49

TP53

ZNF425

AC026713.5

COL6A3

ZNFE27

JARID2

SOCS6

HMG8A

C10orf18

HECW1

HECW1

BSN

MBD5

CASC1

ERN2

ATP2C2

FBXO21

LINGO2

KRT6B

NBPFF16

LAMP3

ZNF536

TBC1D19

SLC7A11

IGF2R

SLC5A1

MLH3

TSC1

CD300A

# SA069 n= 54

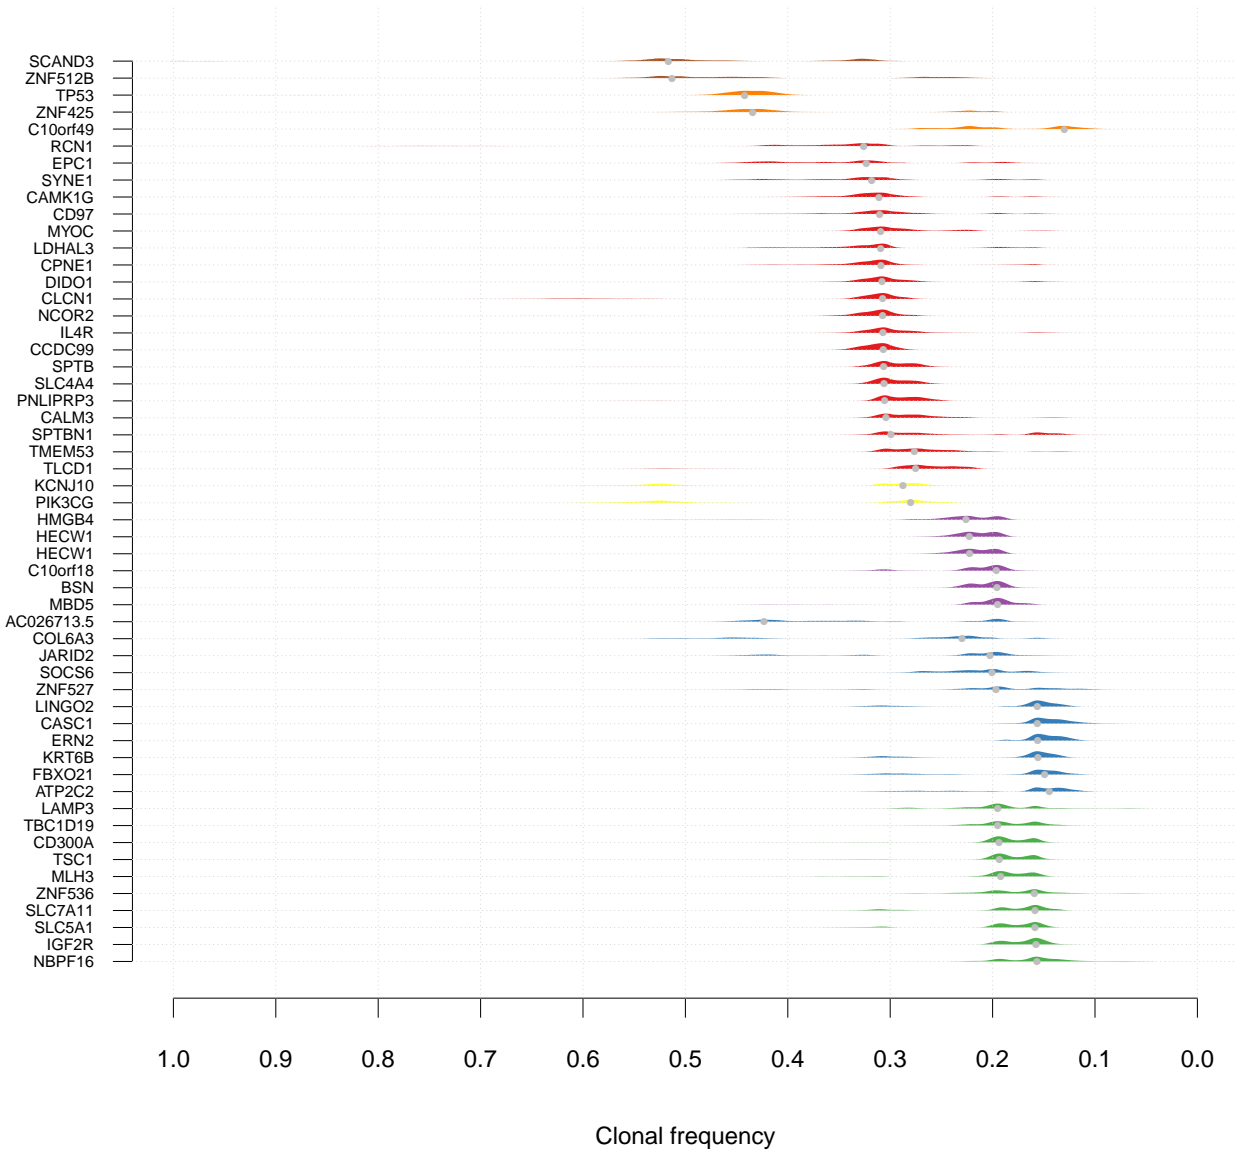

SA071 n= 96

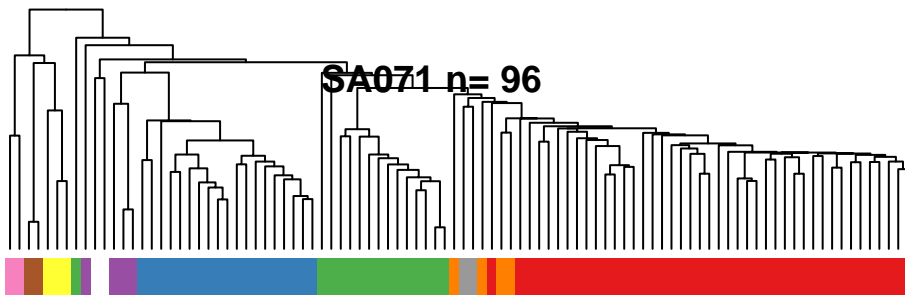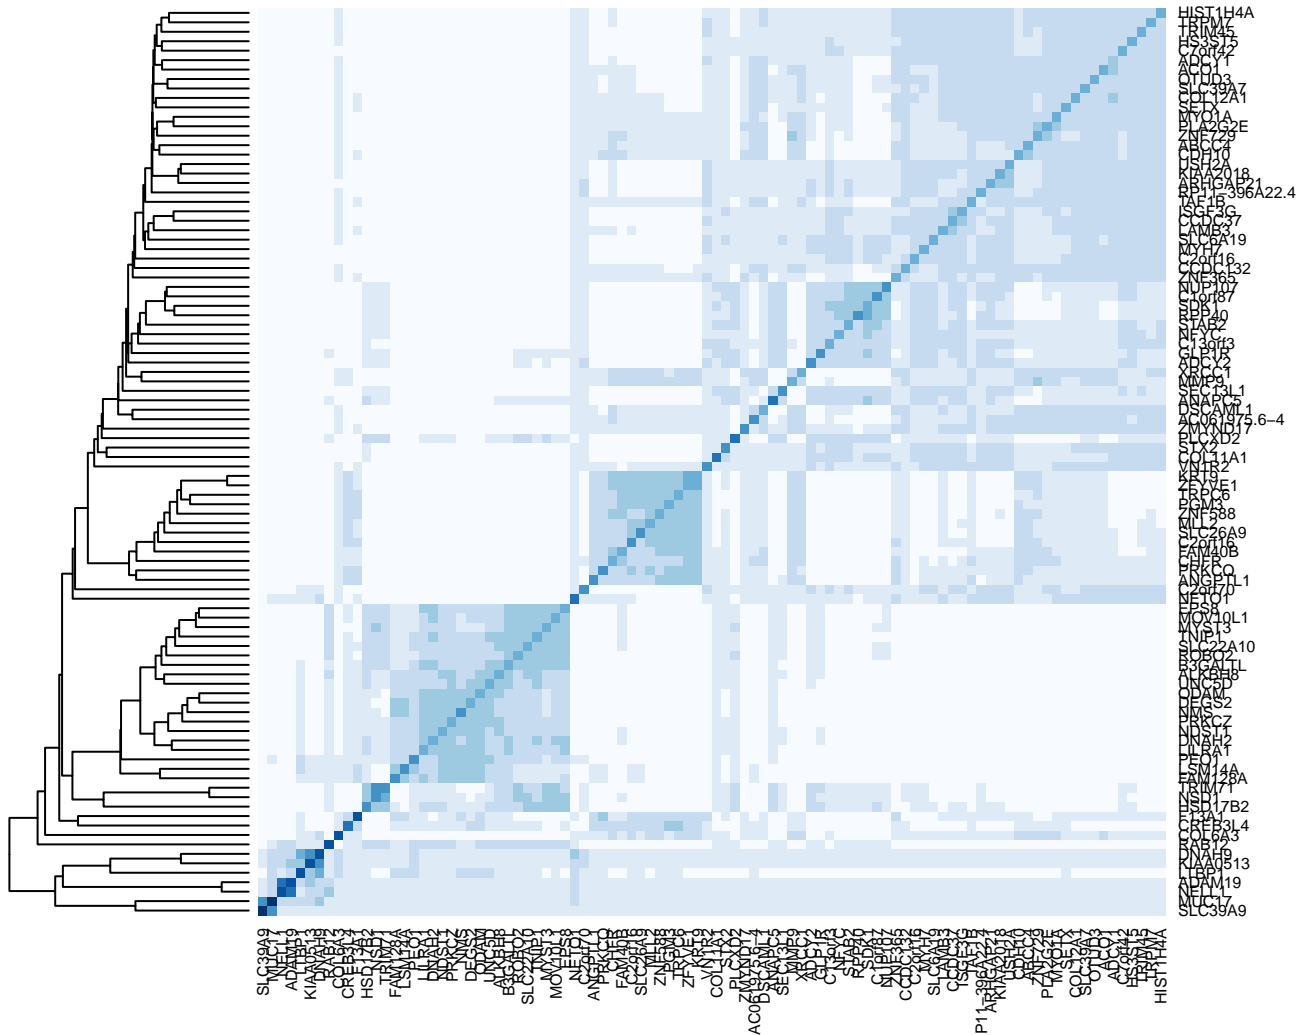

# SA071 n= 96

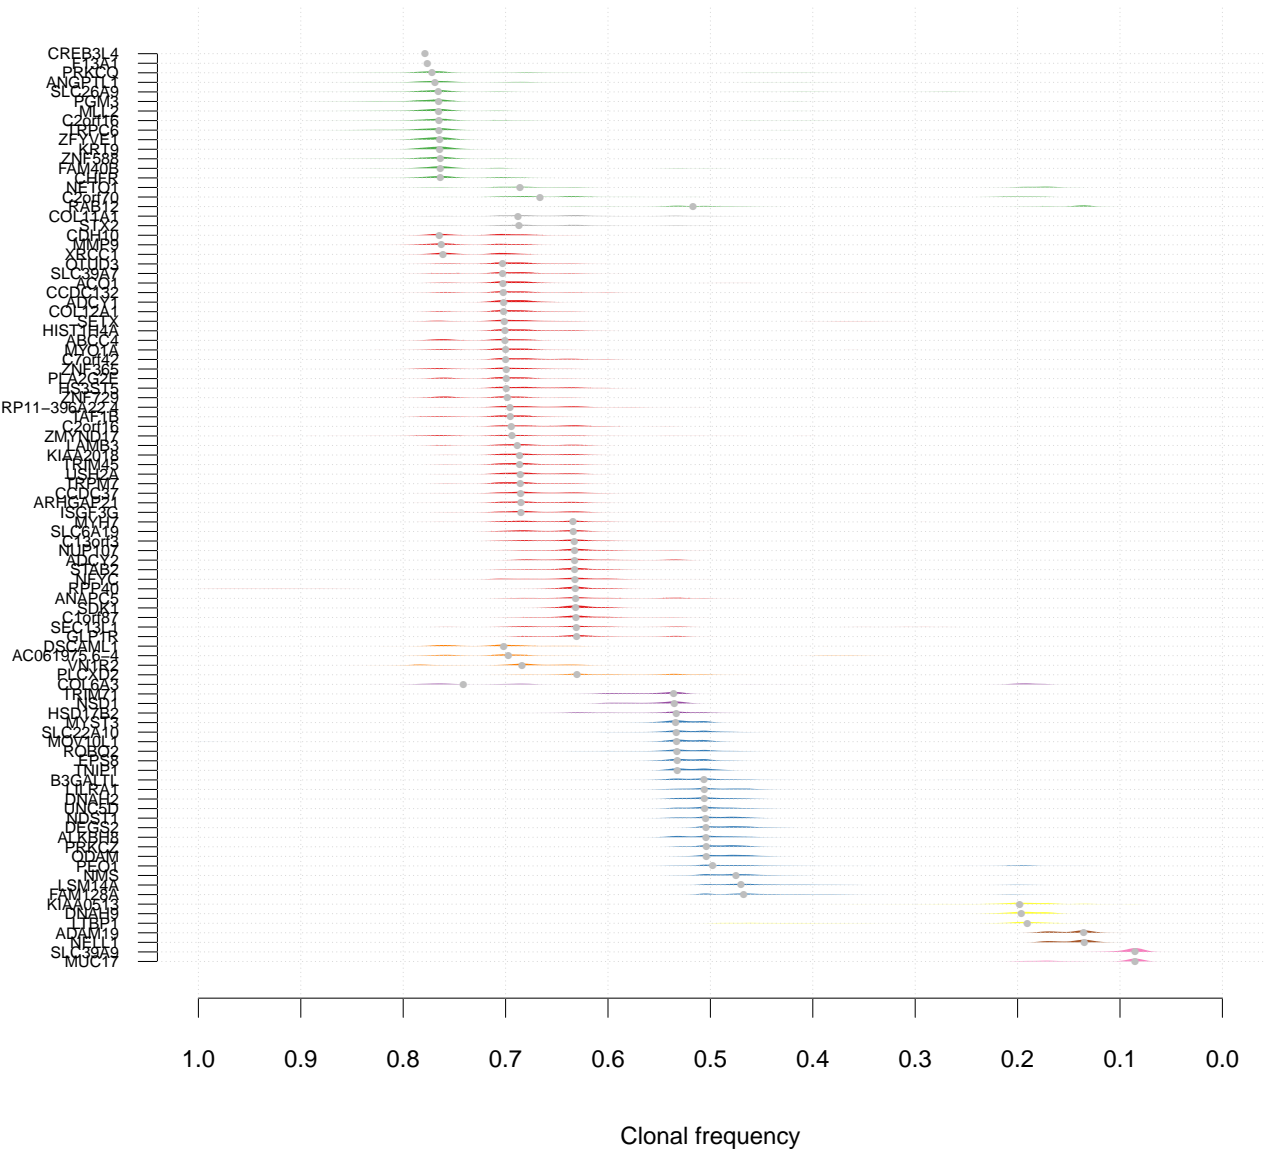





# SA072 n= 22

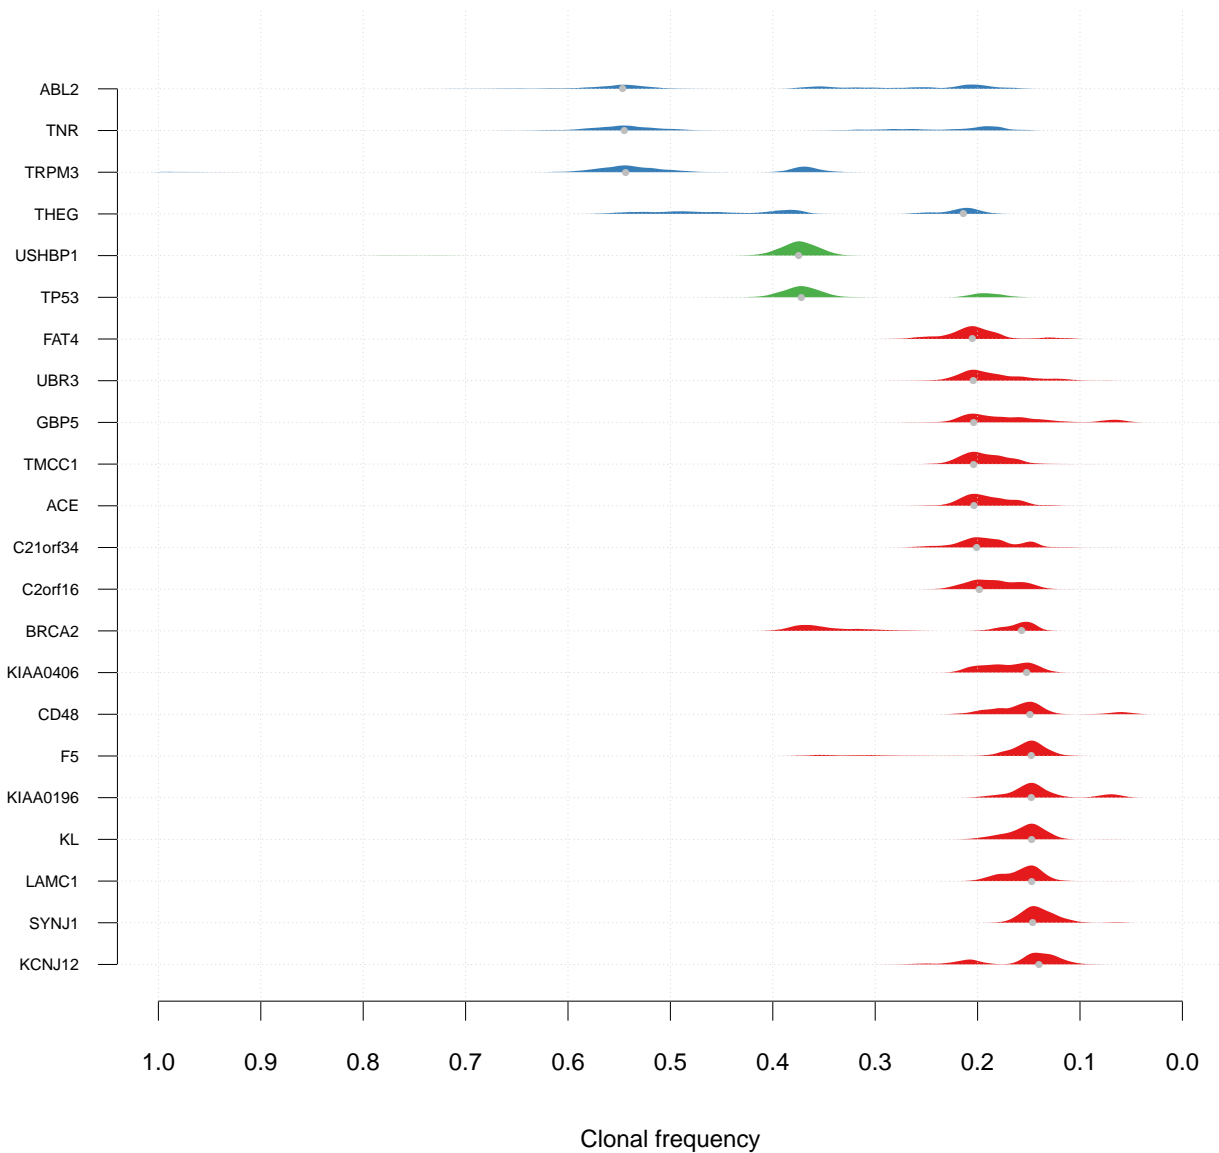

SA073 n= 14

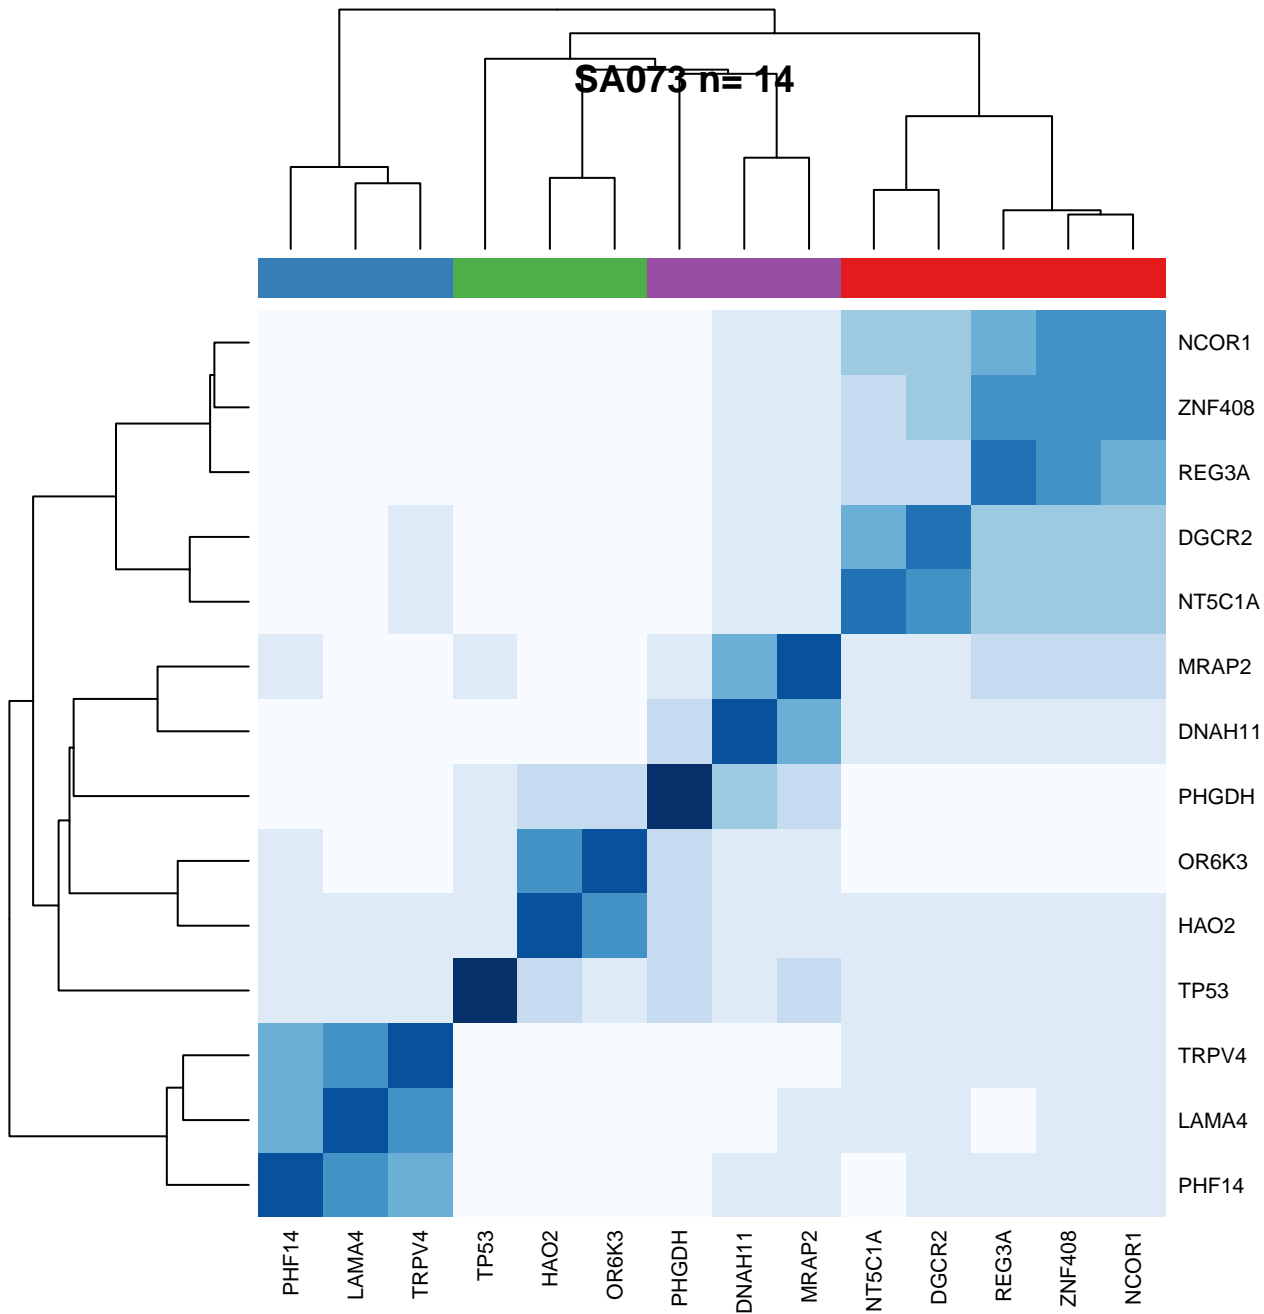

# SA073 n= 14

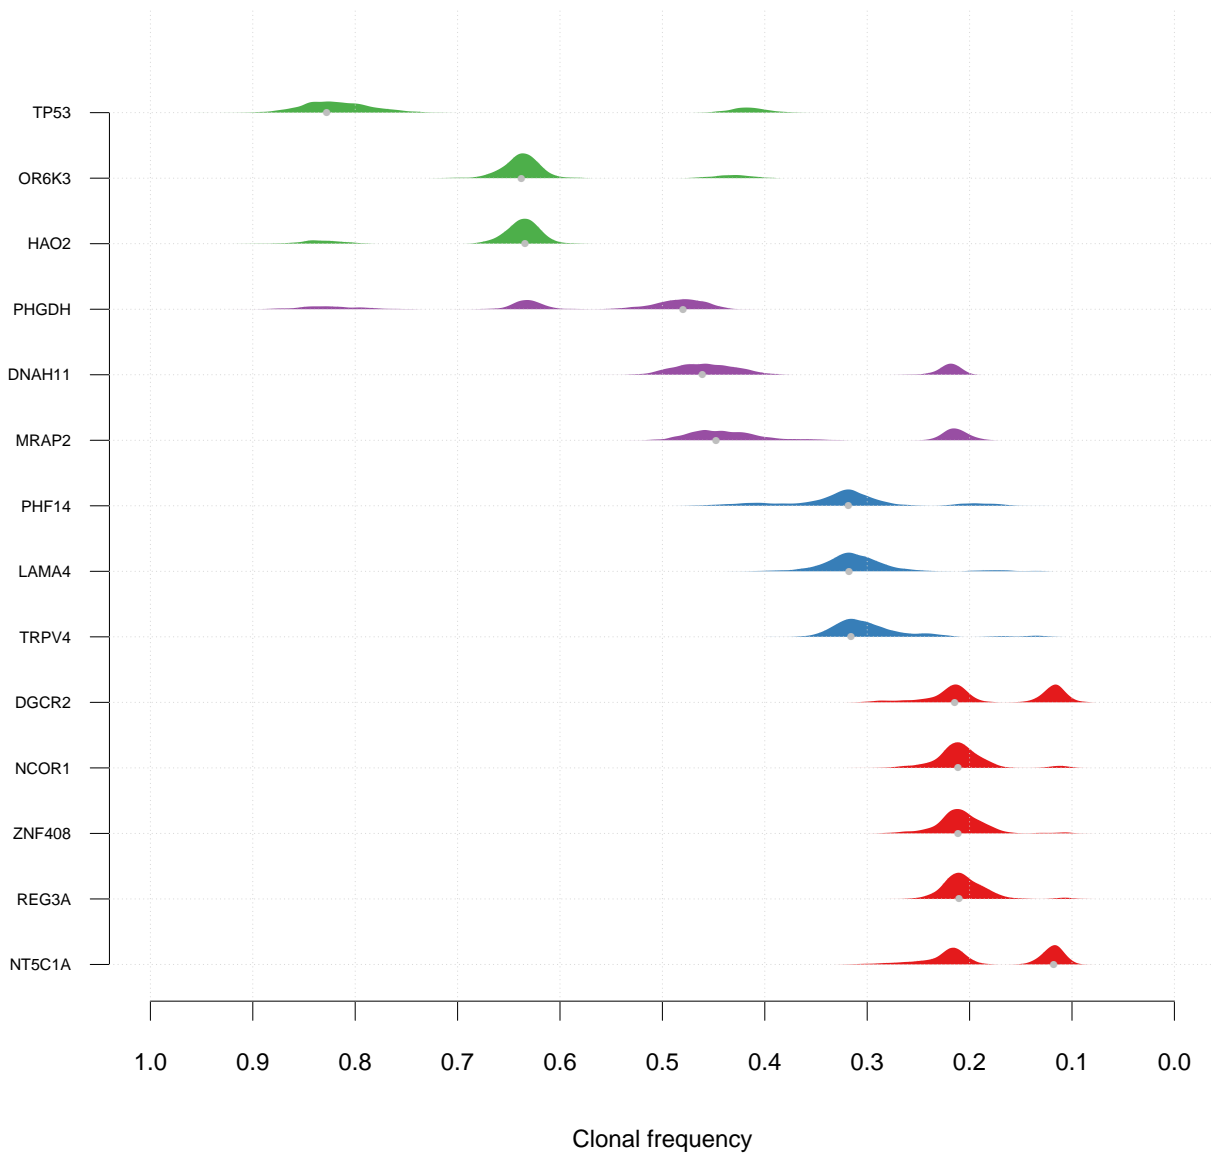

SA074 n= 24

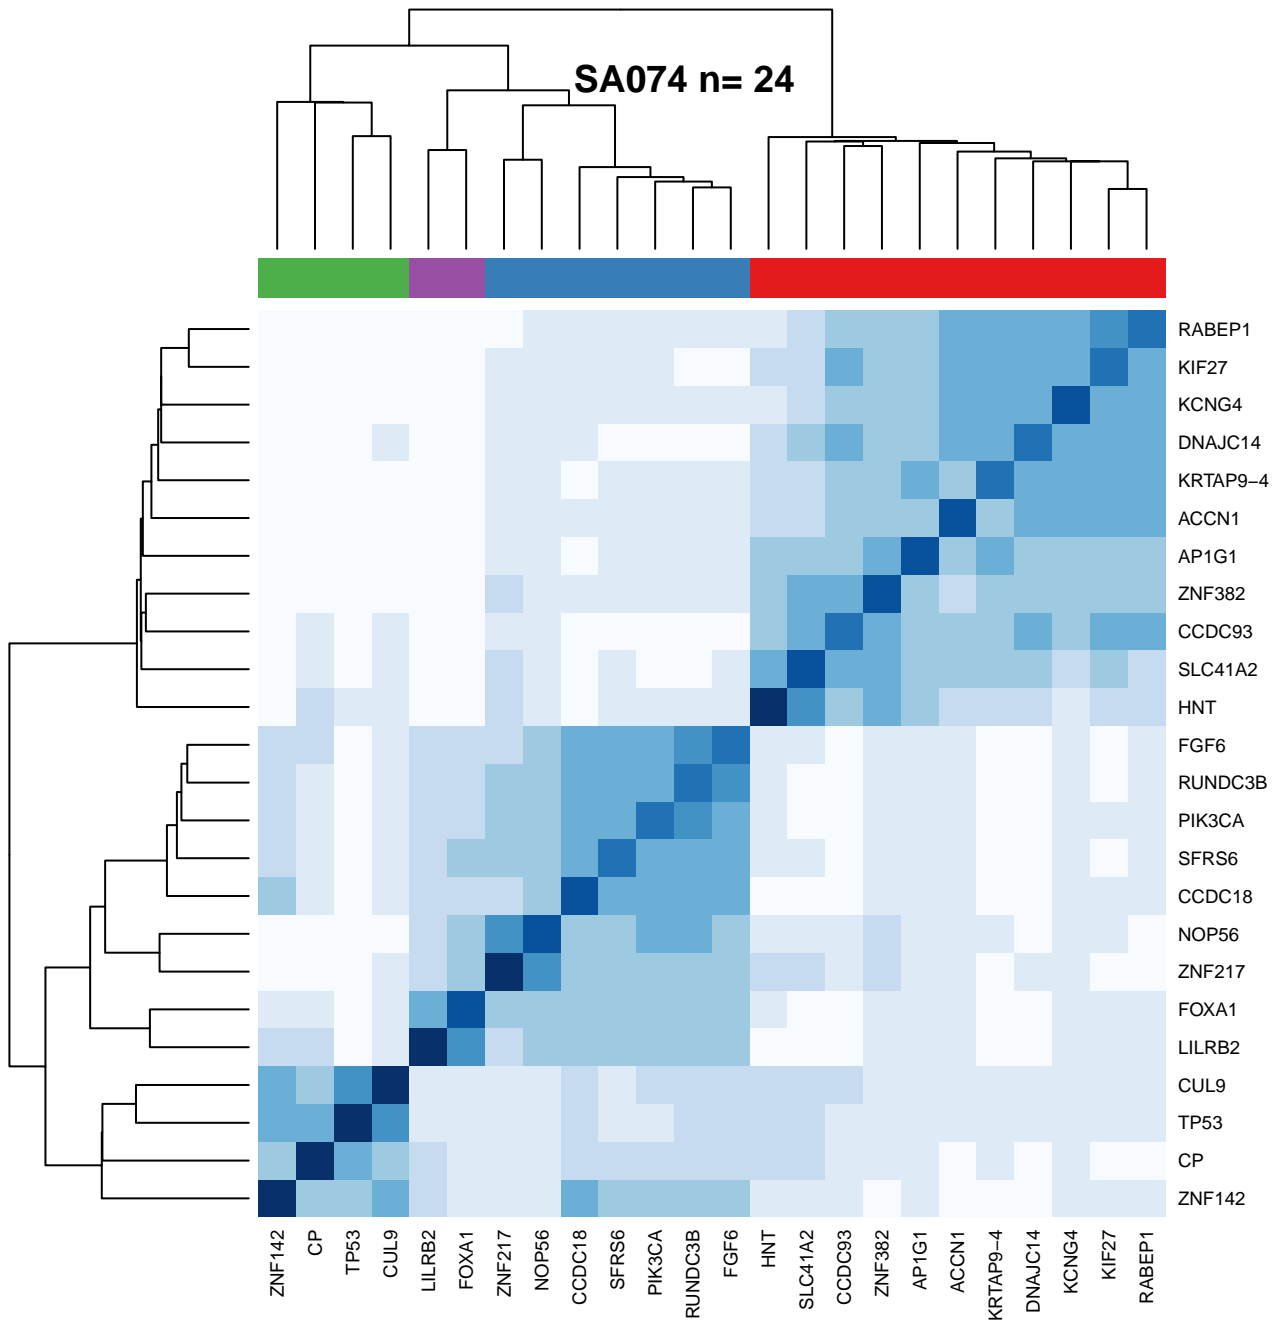

# SA074 n= 24

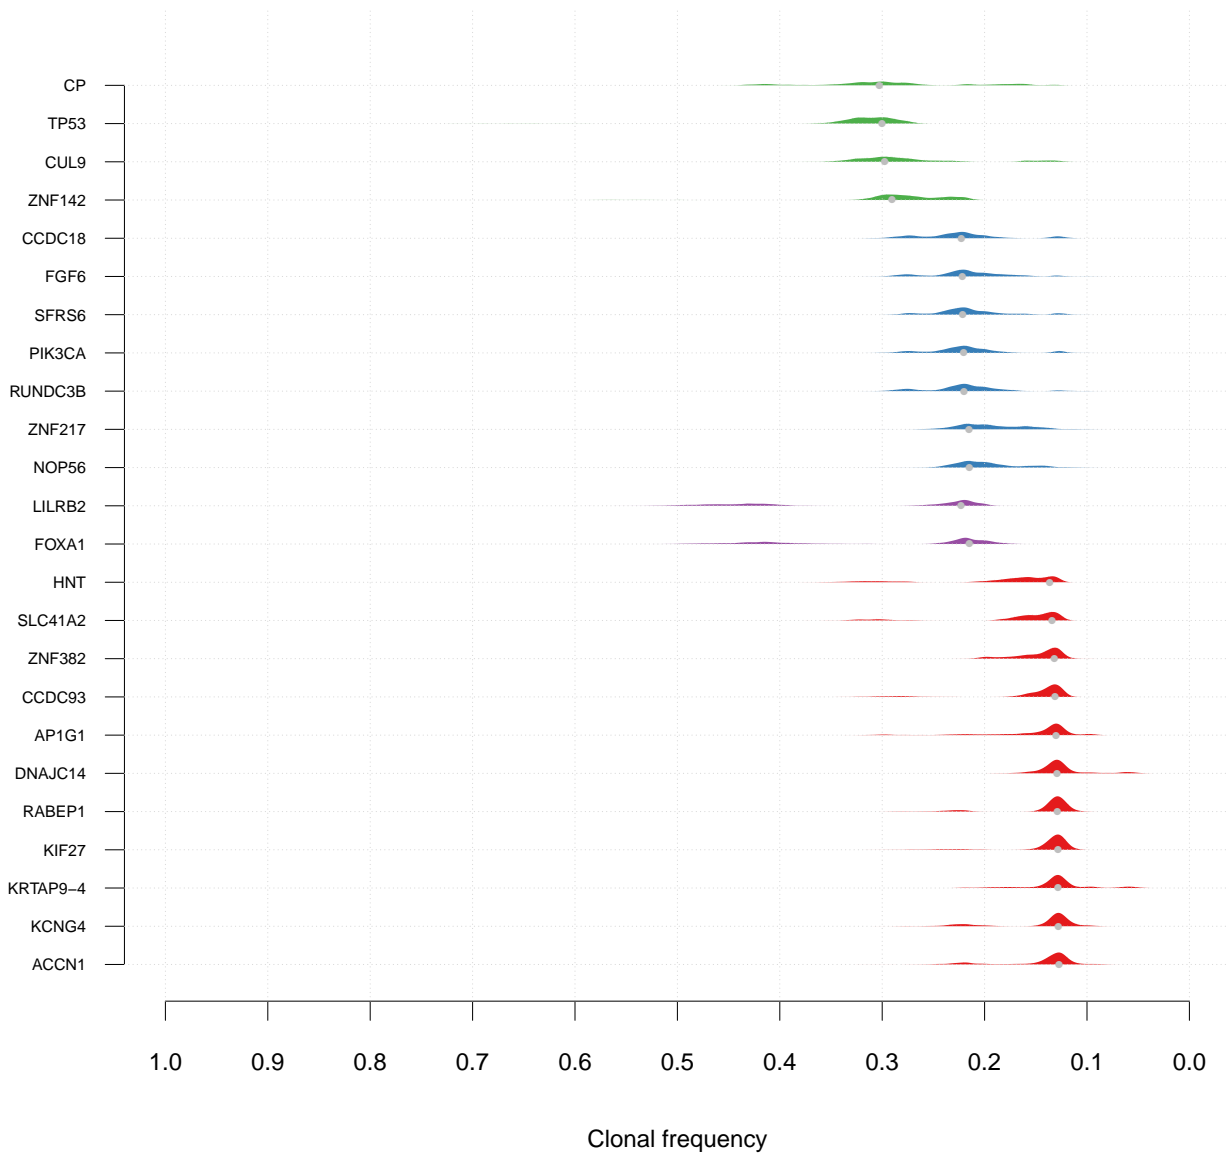

SA075 n= 34

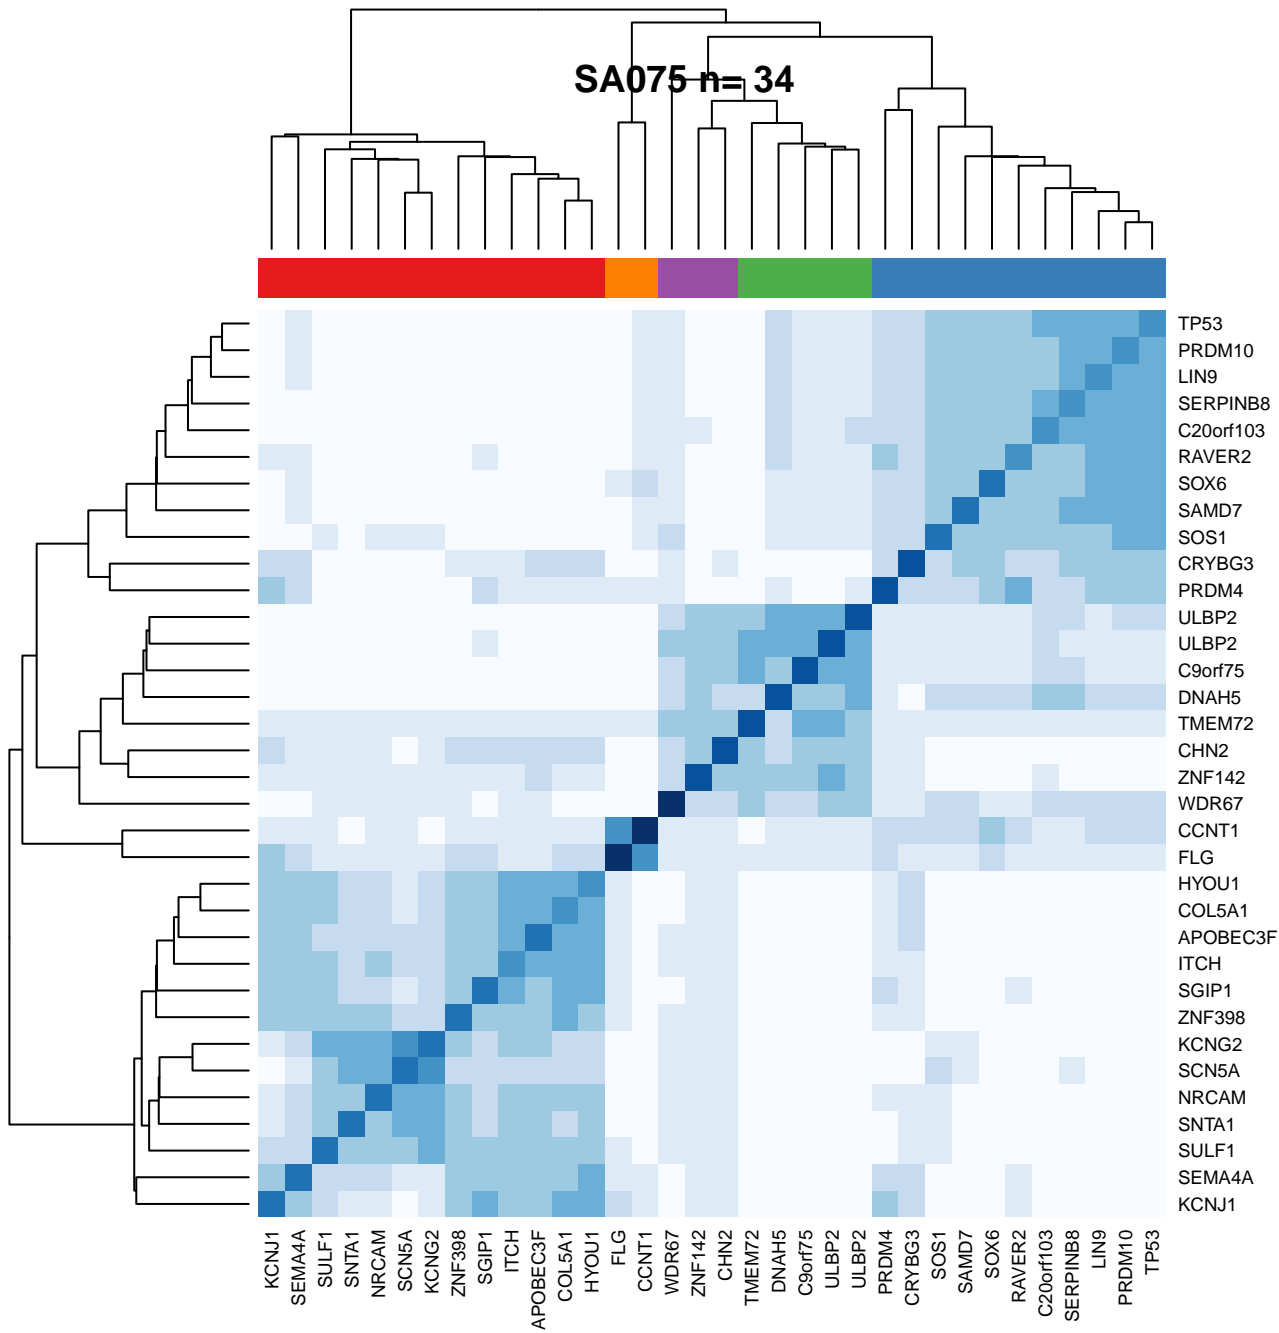

# SA075 n= 34

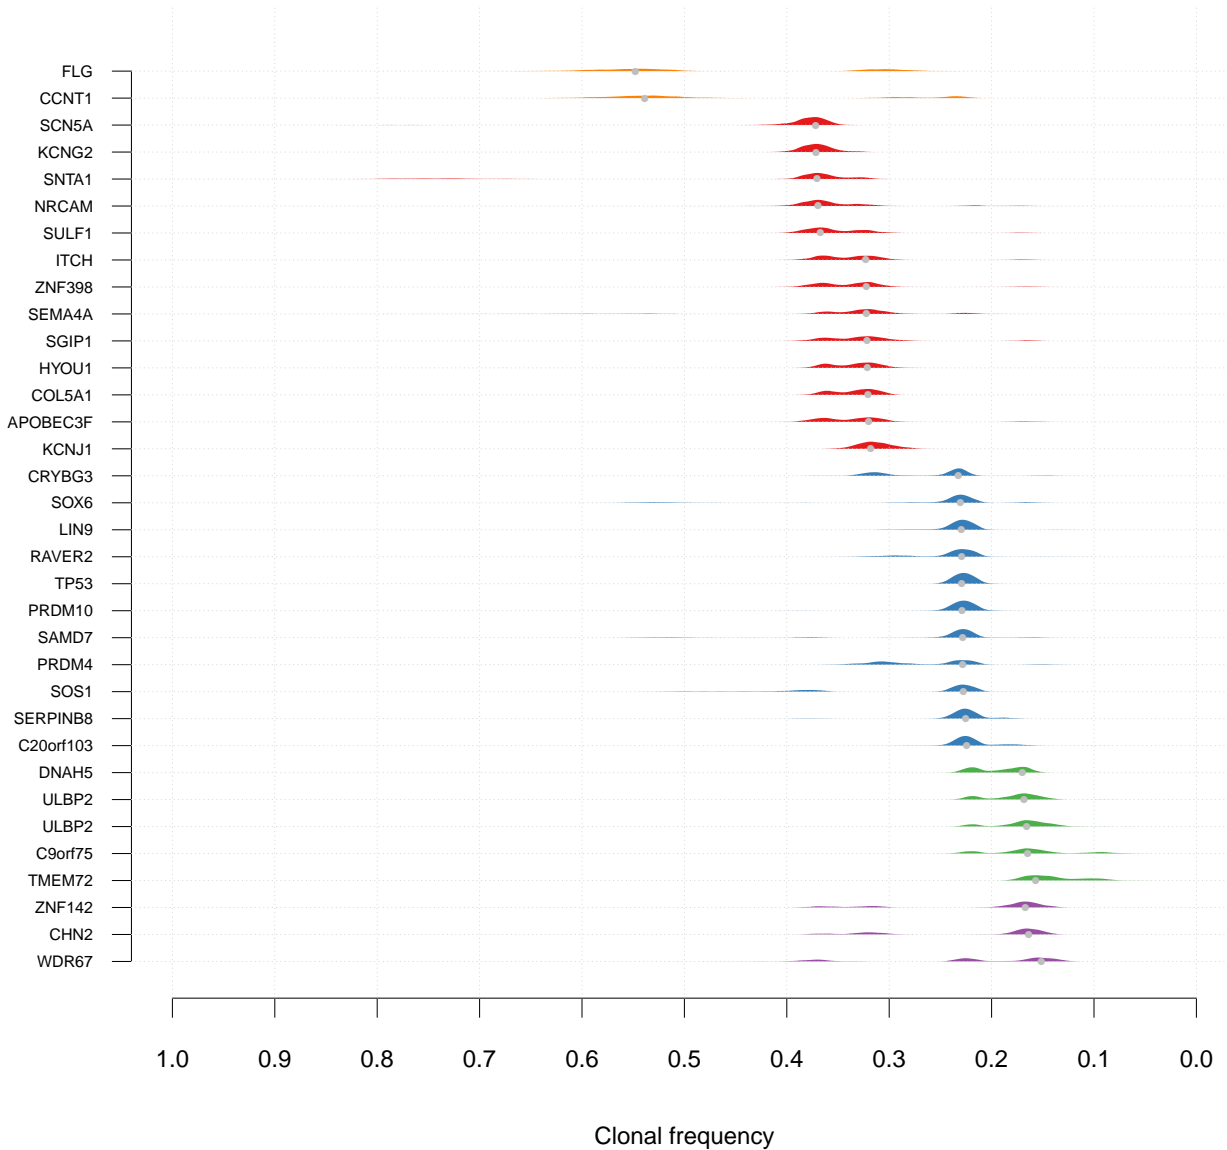





# SA076 n= 14

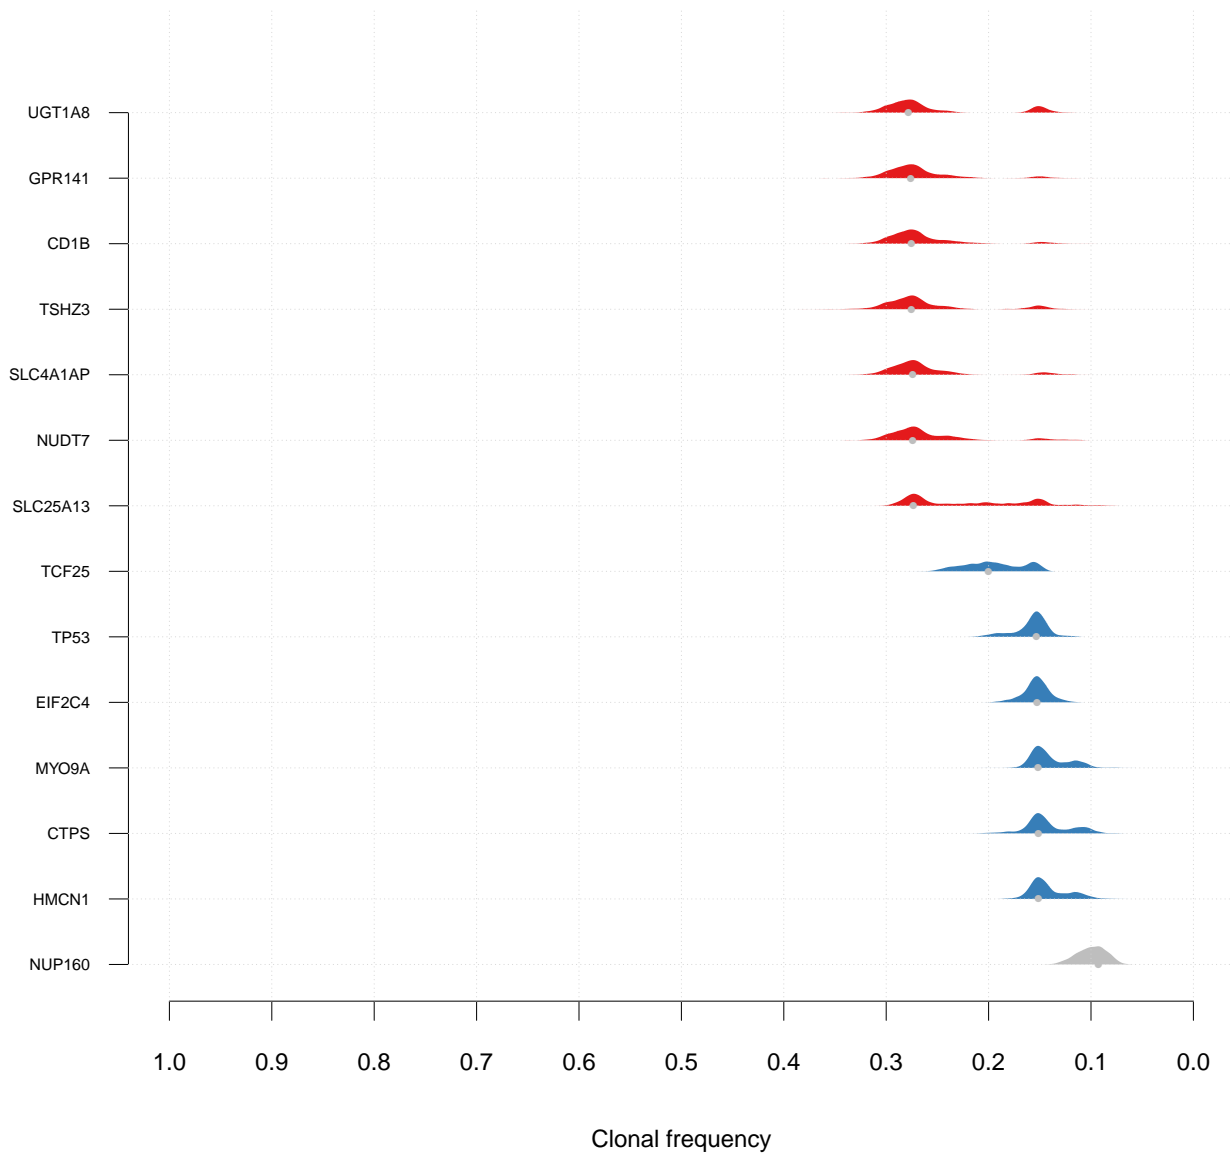

SA077 n= 77

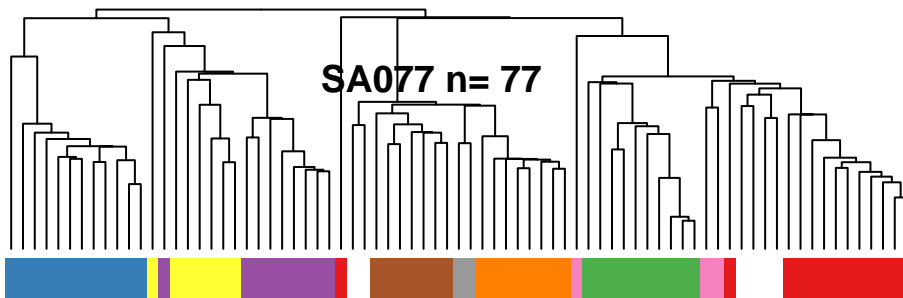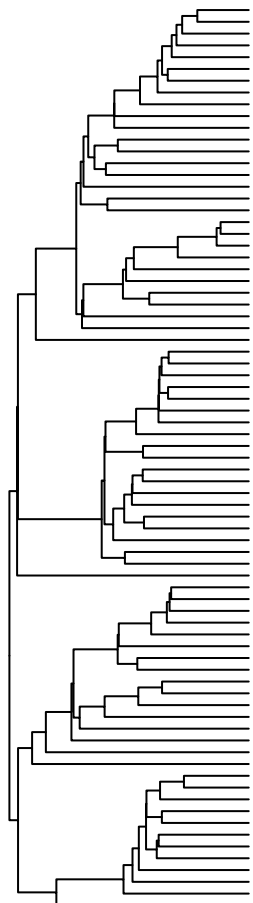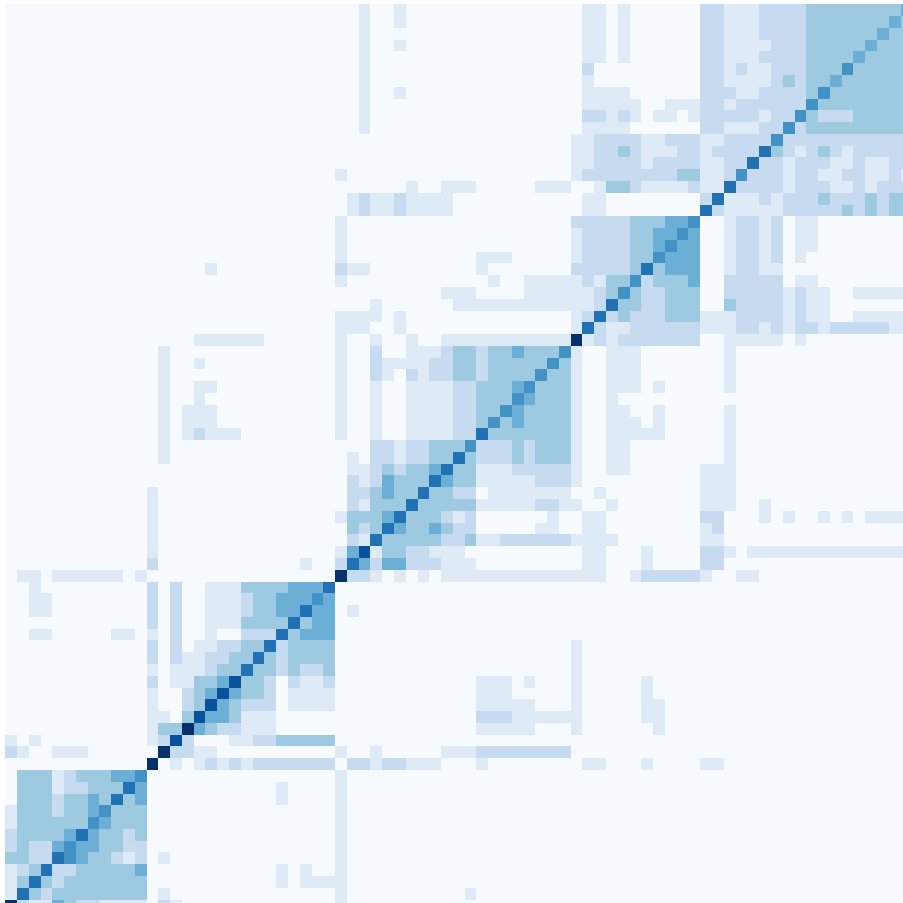

ZNF381  
ANKK38B  
AC093512  
ZNF547P  
ZNF621  
SEIP1  
DAB2IP  
ZNF533  
ZNF533A  
C12orf48  
VPS33C  
OSY1L2  
UNC5C  
LOC100277  
TNFSF15  
ZNF598  
REMIT2  
PRICK4B  
ANKK3  
MAP3K7  
TRIM35  
GIM3  
MARVEL5  
GCCR  
CCND4  
PKD1L1  
XPO5  
POU3F3  
SHROOM3  
PLCG1  
TM6SF1  
FLJ11931  
LUT1  
PPIA  
TMEM164  
C6orf121  
JNL1  
ZNF708  
ZNF533B  
PPIA  
ZNF533A  
ZNF533B  
ZNF533C  
ZNF533D  
ZNF533E  
ZNF533F  
ZNF533G  
ZNF533H  
ZNF533I  
ZNF533J  
ZNF533K  
ZNF533L  
ZNF533M  
ZNF533N  
ZNF533O  
ZNF533P  
ZNF533Q  
ZNF533R  
ZNF533S  
ZNF533T  
ZNF533U  
ZNF533V  
ZNF533W  
ZNF533X  
ZNF533Y  
ZNF533Z  
ZNF533AA  
ZNF533AB  
ZNF533AC  
ZNF533AD  
ZNF533AE  
ZNF533AF  
ZNF533AG  
ZNF533AH  
ZNF533AI  
ZNF533AJ  
ZNF533AK  
ZNF533AL  
ZNF533AM  
ZNF533AN  
ZNF533AO  
ZNF533AP  
ZNF533AQ  
ZNF533AR  
ZNF533AS  
ZNF533AT  
ZNF533AU  
ZNF533AV  
ZNF533AW  
ZNF533AX  
ZNF533AY  
ZNF533AZ  
ZNF533BA  
ZNF533BB  
ZNF533BC  
ZNF533BD  
ZNF533BE  
ZNF533BF  
ZNF533BG  
ZNF533BH  
ZNF533BI  
ZNF533BJ  
ZNF533BK  
ZNF533BL  
ZNF533BM  
ZNF533BN  
ZNF533BO  
ZNF533BP  
ZNF533BQ  
ZNF533BR  
ZNF533BS  
ZNF533BT  
ZNF533BU  
ZNF533BV  
ZNF533BW  
ZNF533BX  
ZNF533BY  
ZNF533BZ  
ZNF533CA  
ZNF533CB  
ZNF533CC  
ZNF533CD  
ZNF533CE  
ZNF533CF  
ZNF533CG  
ZNF533CH  
ZNF533CI  
ZNF533CJ  
ZNF533CK  
ZNF533CL  
ZNF533CM  
ZNF533CN  
ZNF533CO  
ZNF533CP  
ZNF533CQ  
ZNF533CR  
ZNF533CS  
ZNF533CT  
ZNF533CU  
ZNF533CV  
ZNF533CW  
ZNF533CX  
ZNF533CY  
ZNF533CZ  
ZNF533DA  
ZNF533DB  
ZNF533DC  
ZNF533DD  
ZNF533DE  
ZNF533DF  
ZNF533DG  
ZNF533DH  
ZNF533DI  
ZNF533DJ  
ZNF533DK  
ZNF533DL  
ZNF533DM  
ZNF533DN  
ZNF533DO  
ZNF533DP  
ZNF533DQ  
ZNF533DR  
ZNF533DS  
ZNF533DT  
ZNF533DU  
ZNF533DV  
ZNF533DW  
ZNF533DX  
ZNF533DY  
ZNF533DZ  
ZNF533EA  
ZNF533EB  
ZNF533EC  
ZNF533ED  
ZNF533EE  
ZNF533EF  
ZNF533EG  
ZNF533EH  
ZNF533EI  
ZNF533EJ  
ZNF533EK  
ZNF533EL  
ZNF533EM  
ZNF533EN  
ZNF533EO  
ZNF533EP  
ZNF533EQ  
ZNF533ER  
ZNF533ES  
ZNF533ET  
ZNF533EU  
ZNF533EV  
ZNF533EW  
ZNF533EX  
ZNF533EY  
ZNF533EZ  
ZNF533FA  
ZNF533FB  
ZNF533FC  
ZNF533FD  
ZNF533FE  
ZNF533FF  
ZNF533FG  
ZNF533FH  
ZNF533FI  
ZNF533FJ  
ZNF533FK  
ZNF533FL  
ZNF533FM  
ZNF533FN  
ZNF533FO  
ZNF533FP  
ZNF533FQ  
ZNF533FR  
ZNF533FS  
ZNF533FT  
ZNF533FU  
ZNF533FV  
ZNF533FW  
ZNF533FX  
ZNF533FY  
ZNF533FZ  
ZNF533GA  
ZNF533GB  
ZNF533GC  
ZNF533GD  
ZNF533GE  
ZNF533GF  
ZNF533GG  
ZNF533GH  
ZNF533GI  
ZNF533GJ  
ZNF533GK  
ZNF533GL  
ZNF533GM  
ZNF533GN  
ZNF533GO  
ZNF533GP  
ZNF533GQ  
ZNF533GR  
ZNF533GS  
ZNF533GT  
ZNF533GU  
ZNF533GV  
ZNF533GW  
ZNF533GX  
ZNF533GY  
ZNF533GZ  
ZNF533HA  
ZNF533HB  
ZNF533HC  
ZNF533HD  
ZNF533HE  
ZNF533HF  
ZNF533HG  
ZNF533HH  
ZNF533HI  
ZNF533HJ  
ZNF533HK  
ZNF533HL  
ZNF533HM  
ZNF533HN  
ZNF533HO  
ZNF533HP  
ZNF533HQ  
ZNF533HR  
ZNF533HS  
ZNF533HT  
ZNF533HU  
ZNF533HV  
ZNF533HW  
ZNF533HX  
ZNF533HY  
ZNF533HZ  
ZNF533IA  
ZNF533IB  
ZNF533IC  
ZNF533ID  
ZNF533IE  
ZNF533IF  
ZNF533IG  
ZNF533IH  
ZNF533II  
ZNF533IJ  
ZNF533IK  
ZNF533IL  
ZNF533IM  
ZNF533IN  
ZNF533IO  
ZNF533IP  
ZNF533IQ  
ZNF533IR  
ZNF533IS  
ZNF533IT  
ZNF533IU  
ZNF533IV  
ZNF533IW  
ZNF533IX  
ZNF533IY  
ZNF533IZ  
ZNF533JA  
ZNF533JB  
ZNF533JC  
ZNF533JD  
ZNF533JE  
ZNF533JF  
ZNF533JG  
ZNF533JH  
ZNF533JI  
ZNF533JJ  
ZNF533JK  
ZNF533JL  
ZNF533JM  
ZNF533JN  
ZNF533JO  
ZNF533JP  
ZNF533JQ  
ZNF533JR  
ZNF533JS  
ZNF533JT  
ZNF533JU  
ZNF533JV  
ZNF533JW  
ZNF533JX  
ZNF533JY  
ZNF533JZ  
ZNF533KA  
ZNF533KB  
ZNF533KC  
ZNF533KD  
ZNF533KE  
ZNF533KF  
ZNF533KG  
ZNF533KH  
ZNF533KI  
ZNF533KJ  
ZNF533KL  
ZNF533KM  
ZNF533KN  
ZNF533KO  
ZNF533KP  
ZNF533KQ  
ZNF533KR  
ZNF533KS  
ZNF533KT  
ZNF533KU  
ZNF533KV  
ZNF533KW  
ZNF533KX  
ZNF533KY  
ZNF533KZ  
ZNF533LA  
ZNF533LB  
ZNF533LC  
ZNF533LD  
ZNF533LE  
ZNF533LF  
ZNF533LG  
ZNF533LH  
ZNF533LI  
ZNF533LJ  
ZNF533LK  
ZNF533LL  
ZNF533LM  
ZNF533LN  
ZNF533LO  
ZNF533LP  
ZNF533LQ  
ZNF533LR  
ZNF533LS  
ZNF533LT  
ZNF533LU  
ZNF533LV  
ZNF533LW  
ZNF533LX  
ZNF533LY  
ZNF533LZ  
ZNF533MA  
ZNF533MB  
ZNF533MC  
ZNF533MD  
ZNF533ME  
ZNF533MF  
ZNF533MG  
ZNF533MH  
ZNF533MI  
ZNF533MJ  
ZNF533MK  
ZNF533ML  
ZNF533MN  
ZNF533MO  
ZNF533MP  
ZNF533MQ  
ZNF533MR  
ZNF533MS  
ZNF533MT  
ZNF533MU  
ZNF533MV  
ZNF533MW  
ZNF533MX  
ZNF533MY  
ZNF533MZ  
ZNF533NA  
ZNF533NB  
ZNF533NC  
ZNF533ND  
ZNF533NE  
ZNF533NF  
ZNF533NG  
ZNF533NH  
ZNF533NI  
ZNF533NJ  
ZNF533NK  
ZNF533NL  
ZNF533NM  
ZNF533NO  
ZNF533NP  
ZNF533NQ  
ZNF533NR  
ZNF533NS  
ZNF533NT  
ZNF533NU  
ZNF533NV  
ZNF533NW  
ZNF533NX  
ZNF533NY  
ZNF533NZ  
ZNF533OA  
ZNF533OB  
ZNF533OC  
ZNF533OD  
ZNF533OE  
ZNF533OF  
ZNF533OG  
ZNF533OH  
ZNF533OI  
ZNF533OJ  
ZNF533OK  
ZNF533OL  
ZNF533OM  
ZNF533ON  
ZNF533OO  
ZNF533OP  
ZNF533OQ  
ZNF533OR  
ZNF533OS  
ZNF533OT  
ZNF533OU  
ZNF533OV  
ZNF533OW  
ZNF533OX  
ZNF533OY  
ZNF533OZ  
ZNF533PA  
ZNF533PB  
ZNF533PC  
ZNF533PD  
ZNF533PE  
ZNF533PF  
ZNF533PG  
ZNF533PH  
ZNF533PI  
ZNF533PJ  
ZNF533PK  
ZNF533PL  
ZNF533PM  
ZNF533PN  
ZNF533PO  
ZNF533PP  
ZNF533PQ  
ZNF533PR  
ZNF533PS  
ZNF533PT  
ZNF533PU  
ZNF533PV  
ZNF533PW  
ZNF533PX  
ZNF533PY  
ZNF533PZ  
ZNF533QA  
ZNF533QB  
ZNF533QC  
ZNF533QD  
ZNF533QE  
ZNF533QF  
ZNF533QG  
ZNF533QH  
ZNF533QI  
ZNF533QJ  
ZNF533QK  
ZNF533QL  
ZNF533QM  
ZNF533QN  
ZNF533QO  
ZNF533QP  
ZNF533QQ  
ZNF533QR  
ZNF533QS  
ZNF533QT  
ZNF533QU  
ZNF533QV  
ZNF533QW  
ZNF533QX  
ZNF533QY  
ZNF533QZ  
ZNF533RA  
ZNF533RB  
ZNF533RC  
ZNF533RD  
ZNF533RE  
ZNF533RF  
ZNF533RG  
ZNF533RH  
ZNF533RI  
ZNF533RJ  
ZNF533RK  
ZNF533RL  
ZNF533RM  
ZNF533RN  
ZNF533RO  
ZNF533RP  
ZNF533RQ  
ZNF533RR  
ZNF533RS  
ZNF533RT  
ZNF533RU  
ZNF533RV  
ZNF533RW  
ZNF533RX  
ZNF533RY  
ZNF533RZ  
ZNF533SA  
ZNF533SB  
ZNF533SC  
ZNF533SD  
ZNF533SE  
ZNF533SF  
ZNF533SG  
ZNF533SH  
ZNF533SI  
ZNF533SJ  
ZNF533SK  
ZNF533SL  
ZNF533SM  
ZNF533SN  
ZNF533SO  
ZNF533SP  
ZNF533SQ  
ZNF533SR  
ZNF533SS  
ZNF533ST  
ZNF533SU  
ZNF533SV  
ZNF533SW  
ZNF533SX  
ZNF533SY  
ZNF533SZ  
ZNF533TA  
ZNF533TB  
ZNF533TC  
ZNF533TD  
ZNF533TE  
ZNF533TF  
ZNF533TG  
ZNF533TH  
ZNF533TI  
ZNF533TJ  
ZNF533TK  
ZNF533TL  
ZNF533TM  
ZNF533TN  
ZNF533TO  
ZNF533TP  
ZNF533TQ  
ZNF533TR  
ZNF533TS  
ZNF533TT  
ZNF533TU  
ZNF533TV  
ZNF533TW  
ZNF533TX  
ZNF533TY  
ZNF533TZ  
ZNF533UA  
ZNF533UB  
ZNF533UC  
ZNF533UD  
ZNF533UE  
ZNF533UF  
ZNF533UG  
ZNF533UH  
ZNF533UI  
ZNF533UJ  
ZNF533UK  
ZNF533UL  
ZNF533UM  
ZNF533UN  
ZNF533UO  
ZNF533UP  
ZNF533UQ  
ZNF533UR  
ZNF533US  
ZNF533UT  
ZNF533UU  
ZNF533UV  
ZNF533UW  
ZNF533UX  
ZNF533UY  
ZNF533UZ  
ZNF533VA  
ZNF533VB  
ZNF533VC  
ZNF533VD  
ZNF533VE  
ZNF533VF  
ZNF533VG  
ZNF533VH  
ZNF533VI  
ZNF533VJ  
ZNF533VK  
ZNF533VL  
ZNF533VM  
ZNF533VN  
ZNF533VO  
ZNF533VP  
ZNF533VQ  
ZNF533VR  
ZNF533VS  
ZNF533VT  
ZNF533VU  
ZNF533VV  
ZNF533VW  
ZNF533VX  
ZNF533VY  
ZNF533VZ  
ZNF533WA  
ZNF533WB  
ZNF533WC  
ZNF533WD  
ZNF533WE  
ZNF533WF  
ZNF533WG  
ZNF533WH  
ZNF533WI  
ZNF533WJ  
ZNF533WK  
ZNF533WL  
ZNF533WM  
ZNF533WN  
ZNF533WO  
ZNF533WP  
ZNF533WQ  
ZNF533WR  
ZNF533WS  
ZNF533WT  
ZNF533WU  
ZNF533WV  
ZNF533WW  
ZNF533WX  
ZNF533WY  
ZNF533WZ  
ZNF533XA  
ZNF533XB  
ZNF533XC  
ZNF533XD  
ZNF533XE  
ZNF533XF  
ZNF533XG  
ZNF533XH  
ZNF533XI  
ZNF533XJ  
ZNF533XK  
ZNF533XL  
ZNF533XM  
ZNF533XN  
ZNF533XO  
ZNF533XP  
ZNF533XQ  
ZNF533XR  
ZNF533XS  
ZNF533XT  
ZNF533XU  
ZNF533XV  
ZNF533XW  
ZNF533XX  
ZNF533XY  
ZNF533XZ  
ZNF533YA  
ZNF533YB  
ZNF533YC  
ZNF533YD  
ZNF533YE  
ZNF533YF  
ZNF533YG  
ZNF533YH  
ZNF533YI  
ZNF533YJ  
ZNF533YK  
ZNF533YL  
ZNF533YM  
ZNF533YN  
ZNF533YO  
ZNF533YP  
ZNF533YQ  
ZNF533YR  
ZNF533YS  
ZNF533YT  
ZNF533YU  
ZNF533YV  
ZNF533YW  
ZNF533YX  
ZNF533YY  
ZNF533YZ  
ZNF533ZA  
ZNF533ZB  
ZNF533ZC  
ZNF533ZD  
ZNF533ZE  
ZNF533ZF  
ZNF533ZG  
ZNF533ZH  
ZNF533ZI  
ZNF533ZJ  
ZNF533ZK  
ZNF533ZL  
ZNF533ZM  
ZNF533ZN  
ZNF533ZO  
ZNF533ZP  
ZNF533ZQ  
ZNF533ZR  
ZNF533ZS  
ZNF533ZT  
ZNF533ZU  
ZNF533ZV  
ZNF533ZW  
ZNF533ZX  
ZNF533ZY  
ZNF533ZZ

CTR9  
NELL2  
DNAJC13  
MYH3  
SEMA5A  
DNAH5  
CDR1  
ZNF586  
ZNF532  
INTS3  
SLC7A4  
BPR1BP2  
TMEM46  
ZNF708  
NUP12  
C8orf221  
PEKFB4  
EPHA3  
TMEM180  
PBP1R8  
LCP1  
EUF2  
GARS  
MTMR15  
PLCG1  
SHROOM3  
BDG1B  
CDK8  
XPO6  
PKD1L1  
CCDC88A  
GCCR  
MARVELD2  
GIM5A  
TRIM35  
PCDH2  
MAP3K7IP2  
FGI2  
ANKK3  
PHLDB1  
RAB19  
DBM1B  
INHBB  
TNFSF15  
C6orf27  
GOL3  
SYCE2  
OSTC1  
VPS33C  
C12orf48  
ZNF99  
WIPF2  
TP53  
CARP  
CARP6  
EPE1  
SEZ1  
ZNF225  
AC093512  
ANKK3B  
ZNF331

# SA077 n= 77

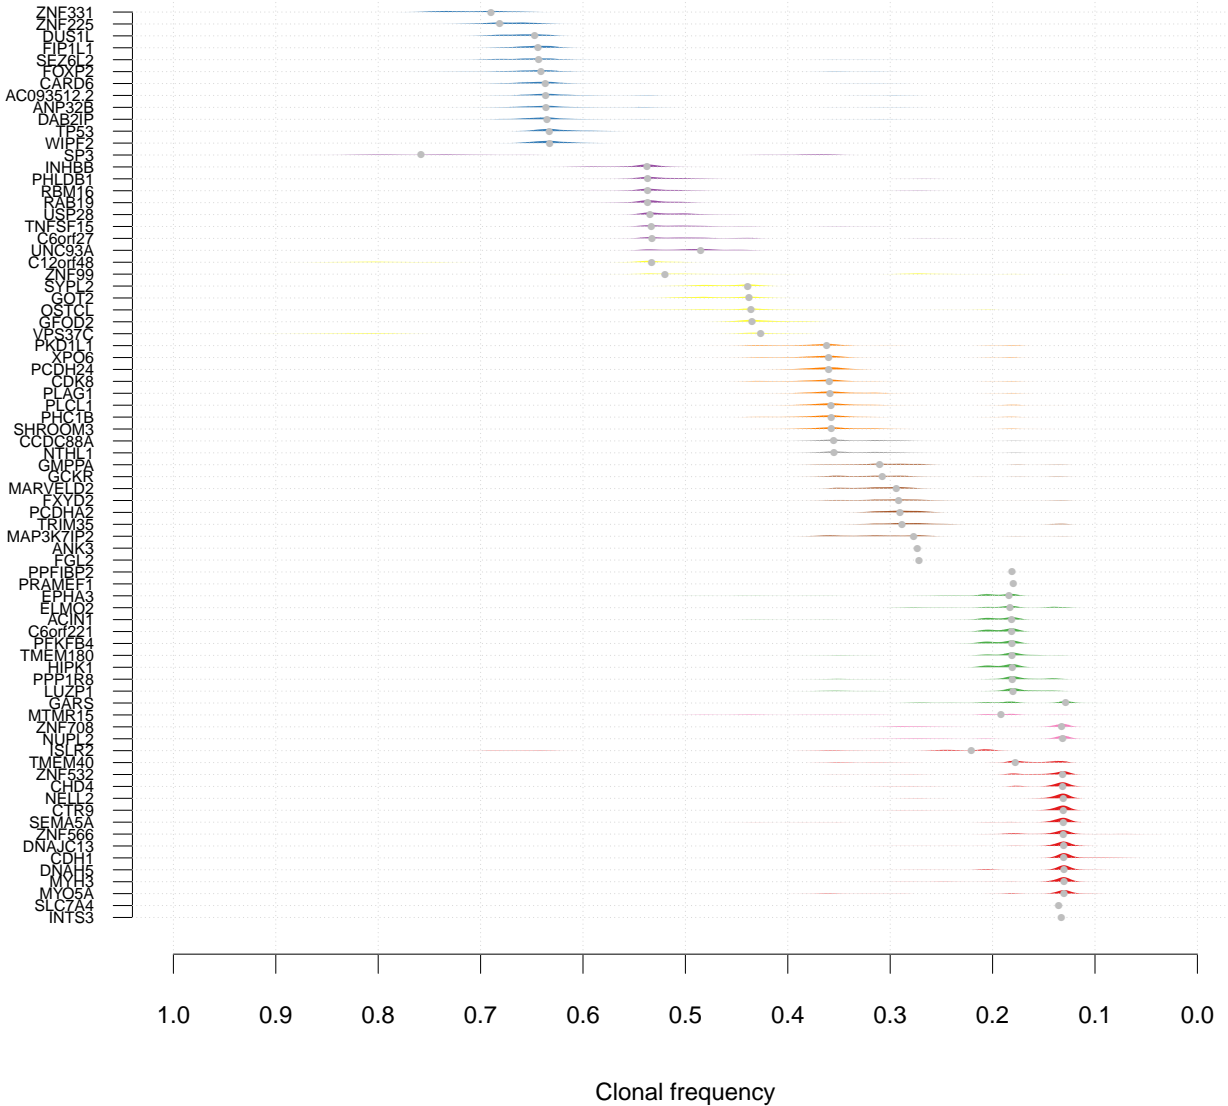

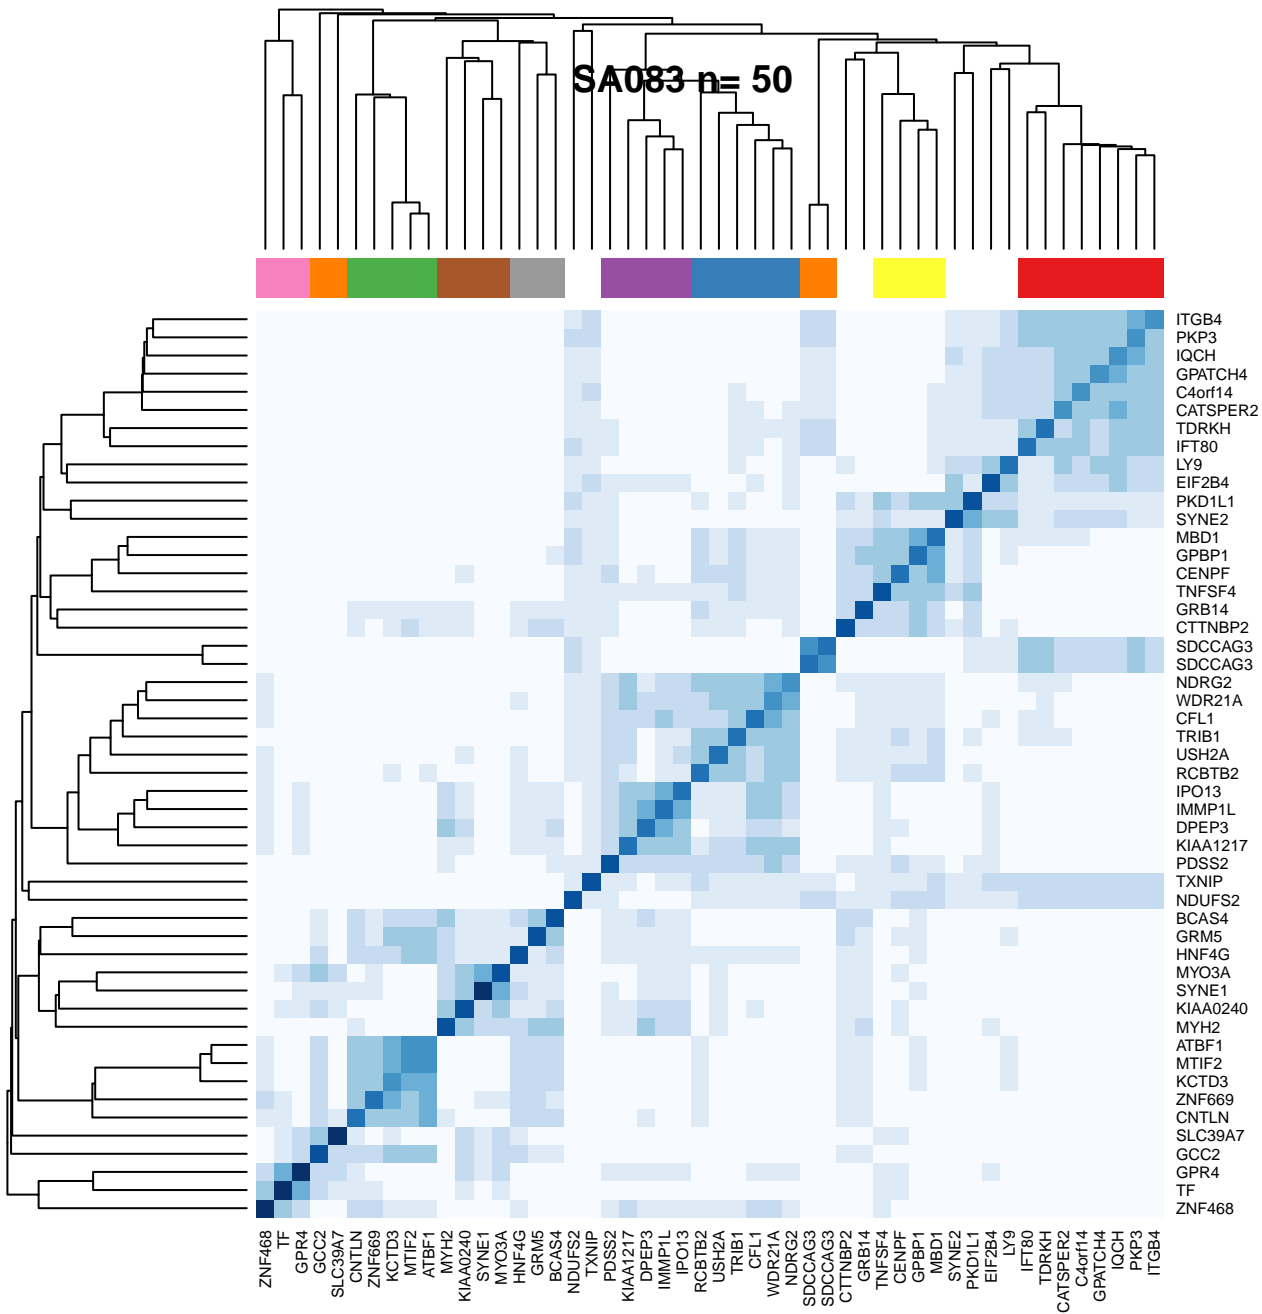

# SA083 n= 50

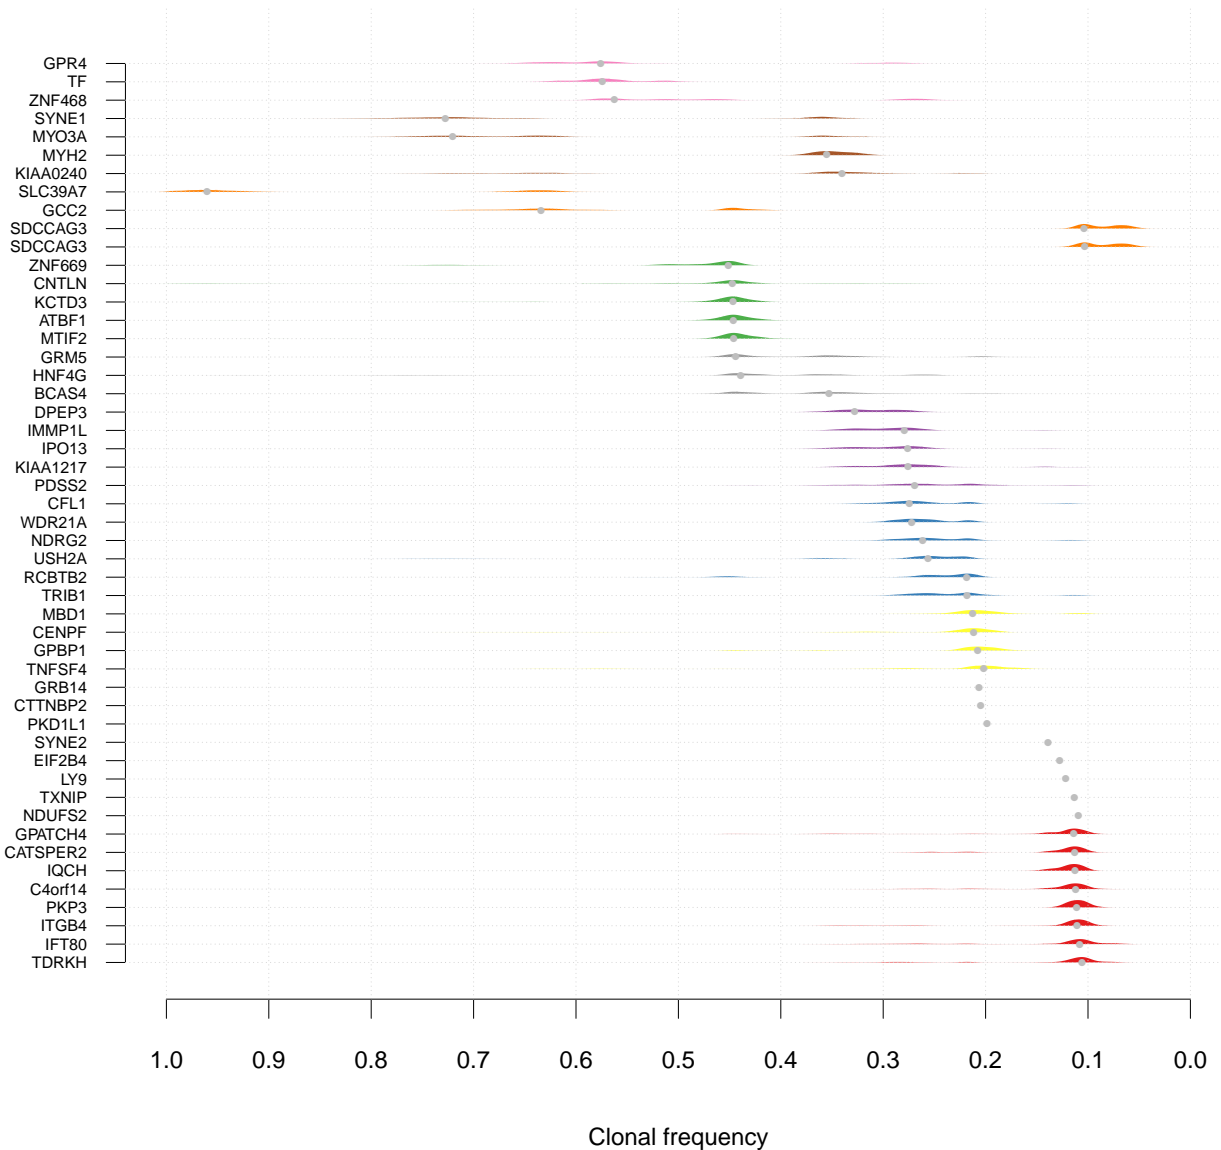

SA084 n= 65

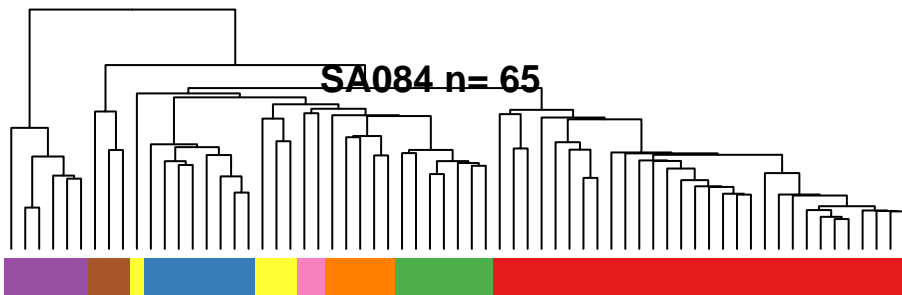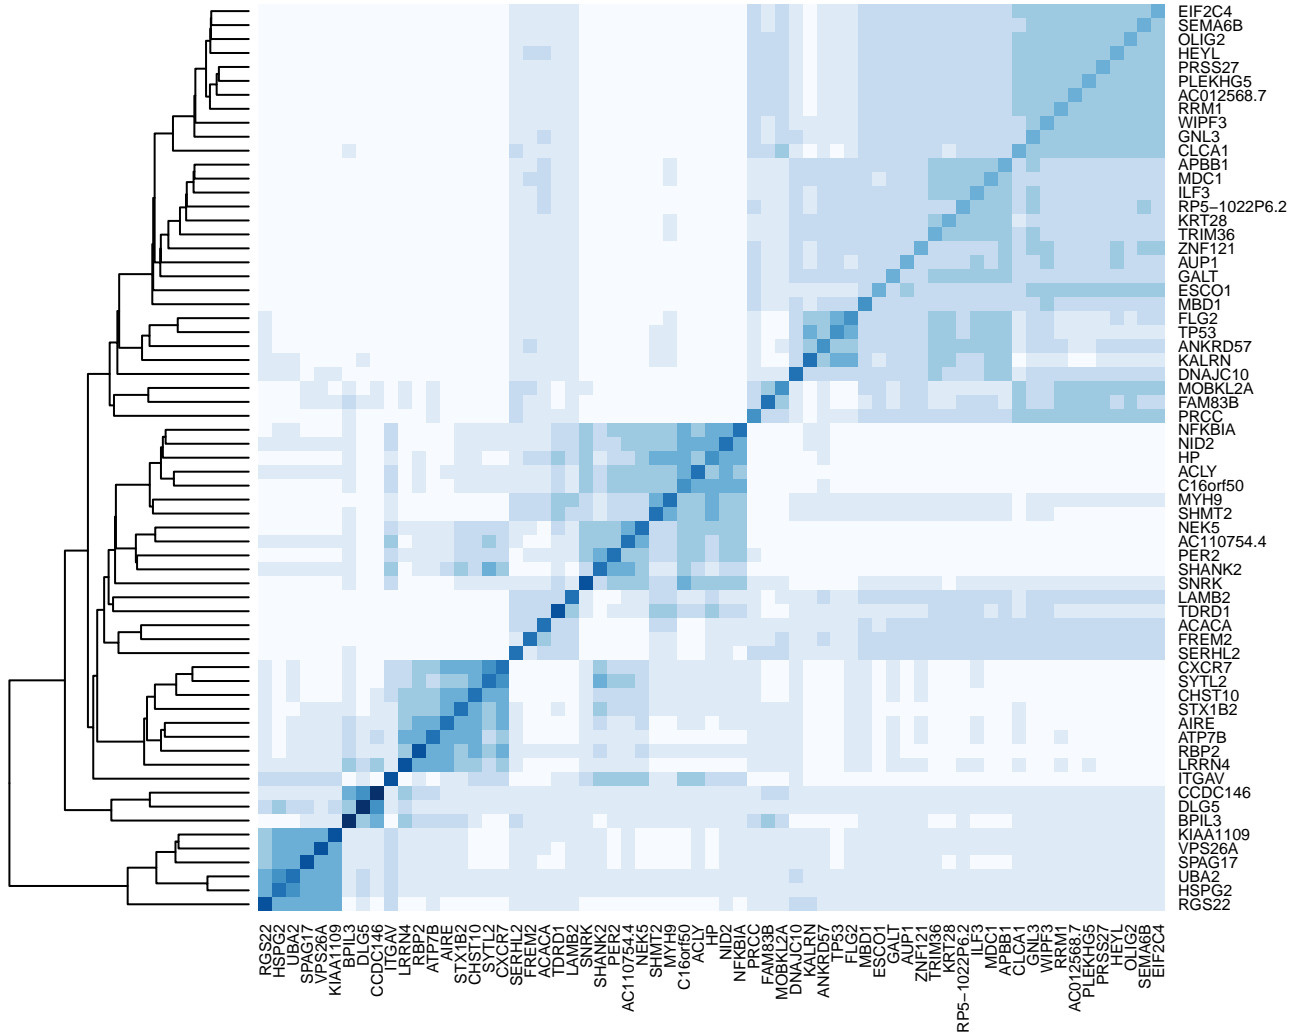

# SA084 n= 65

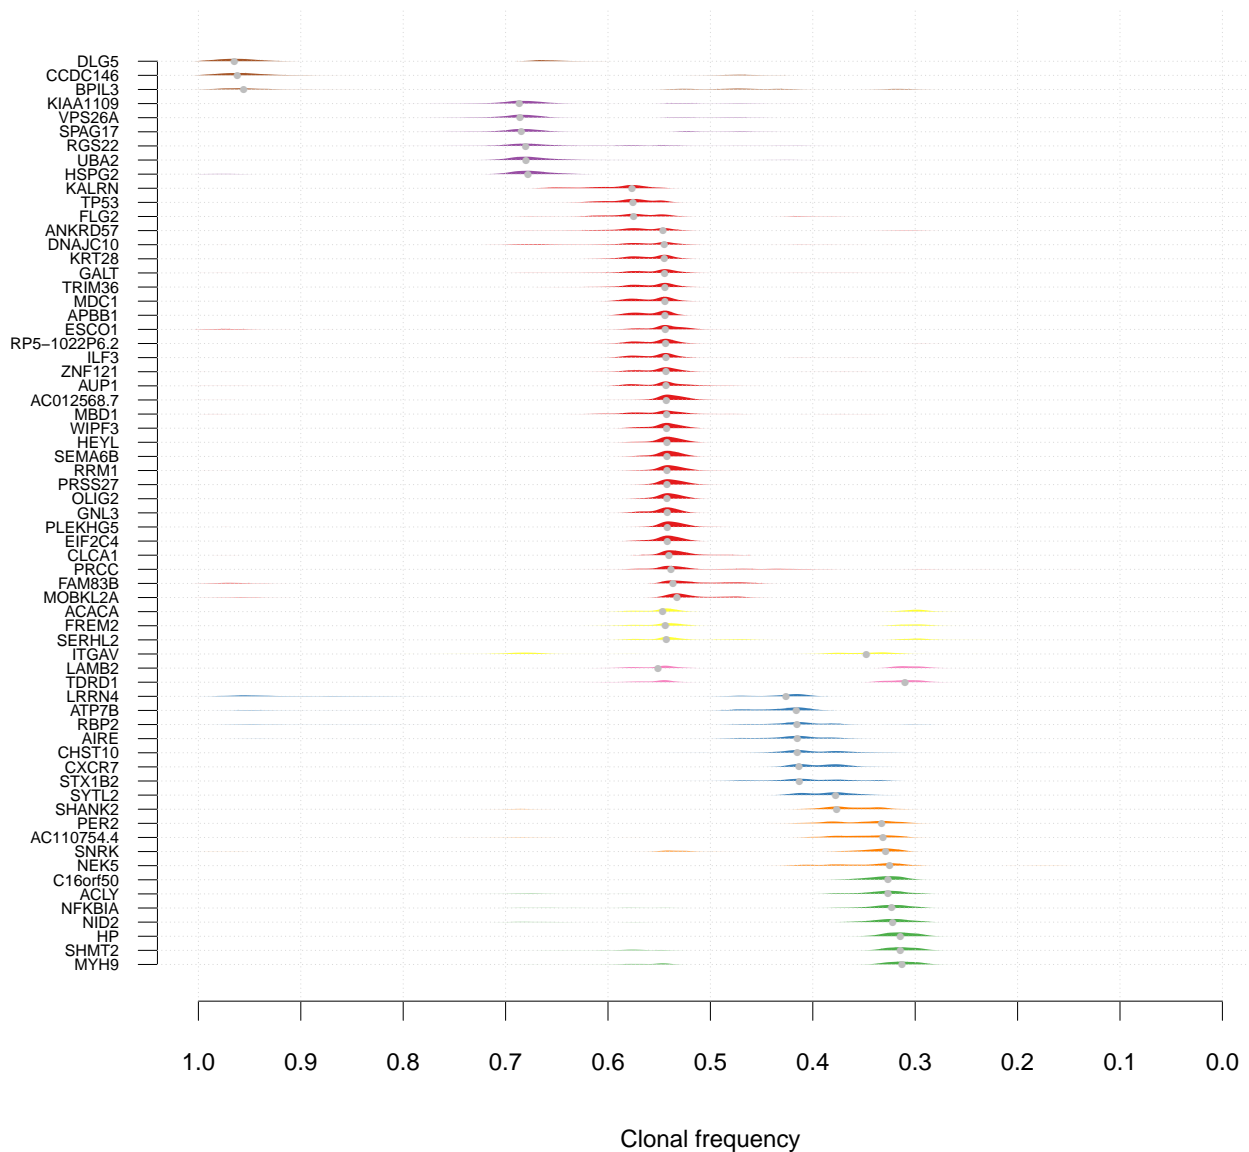



SA089 n= 49

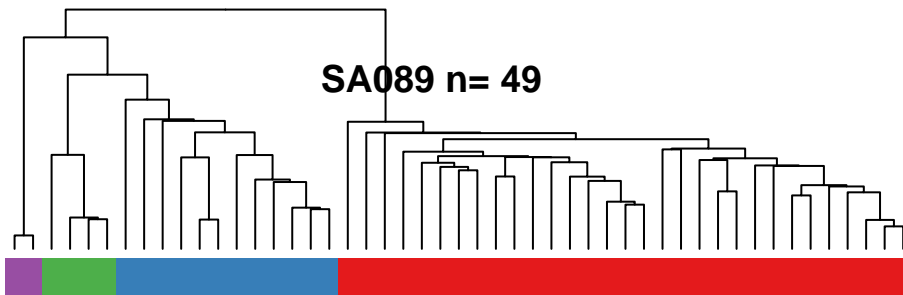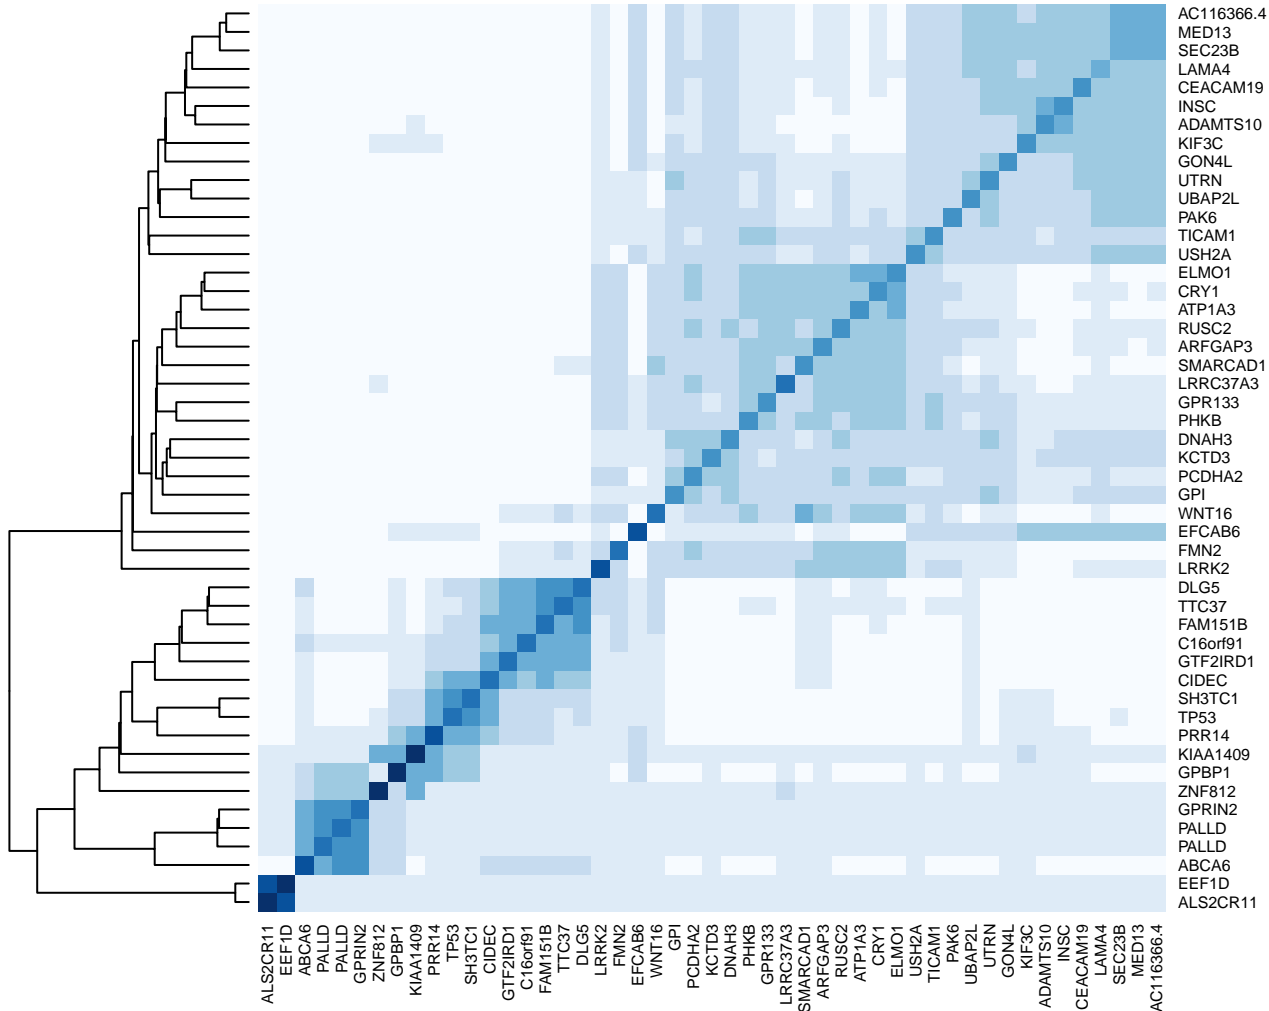

# SA089 n= 49

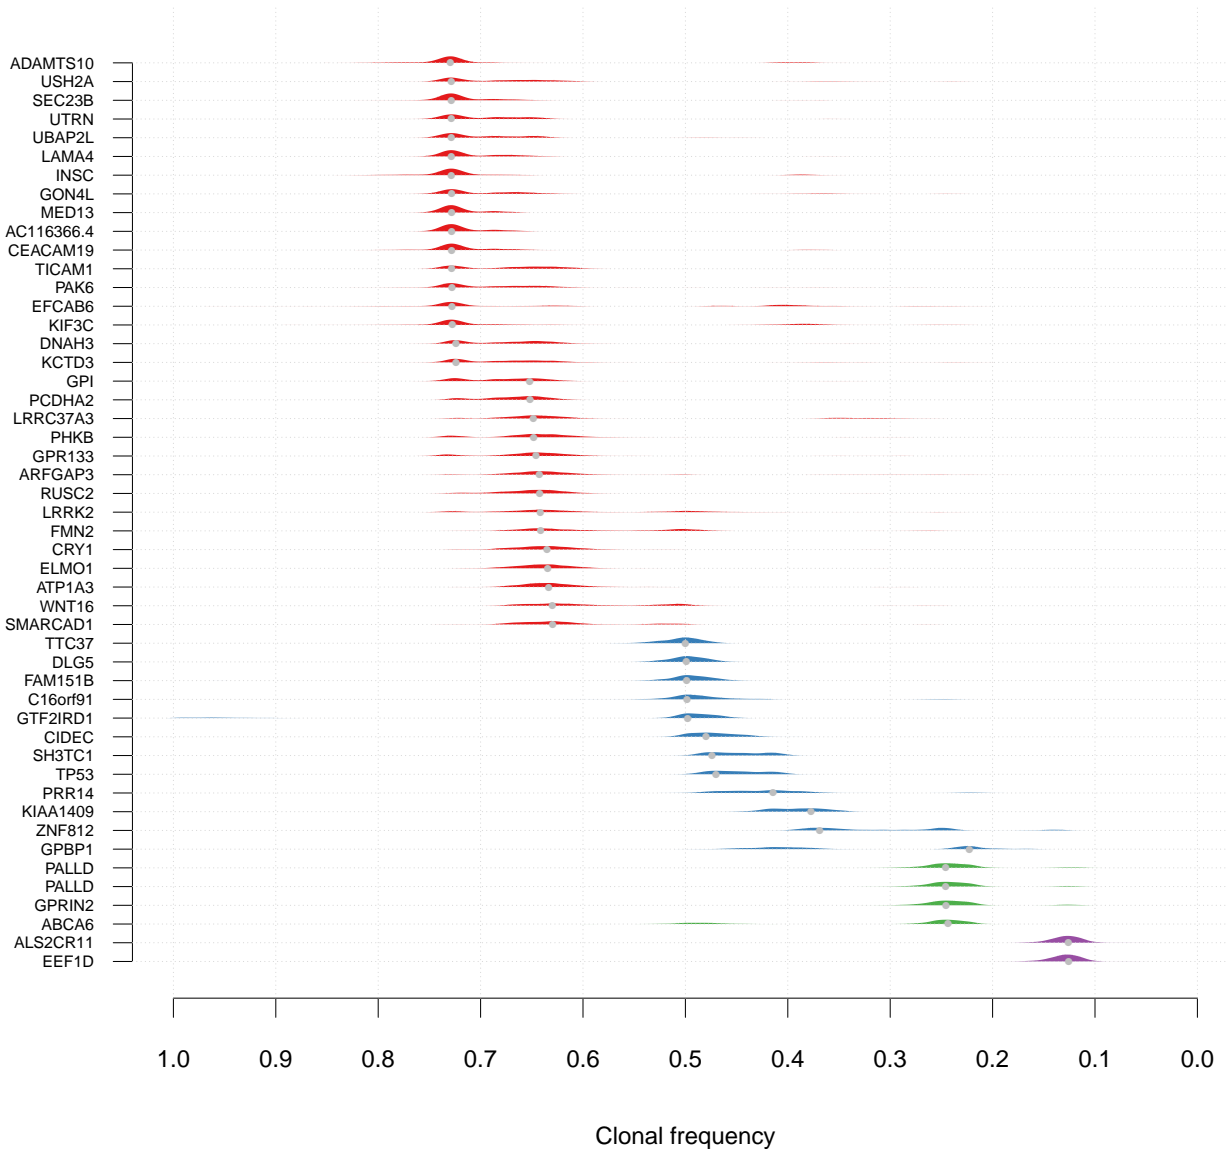

SA090 n= 36

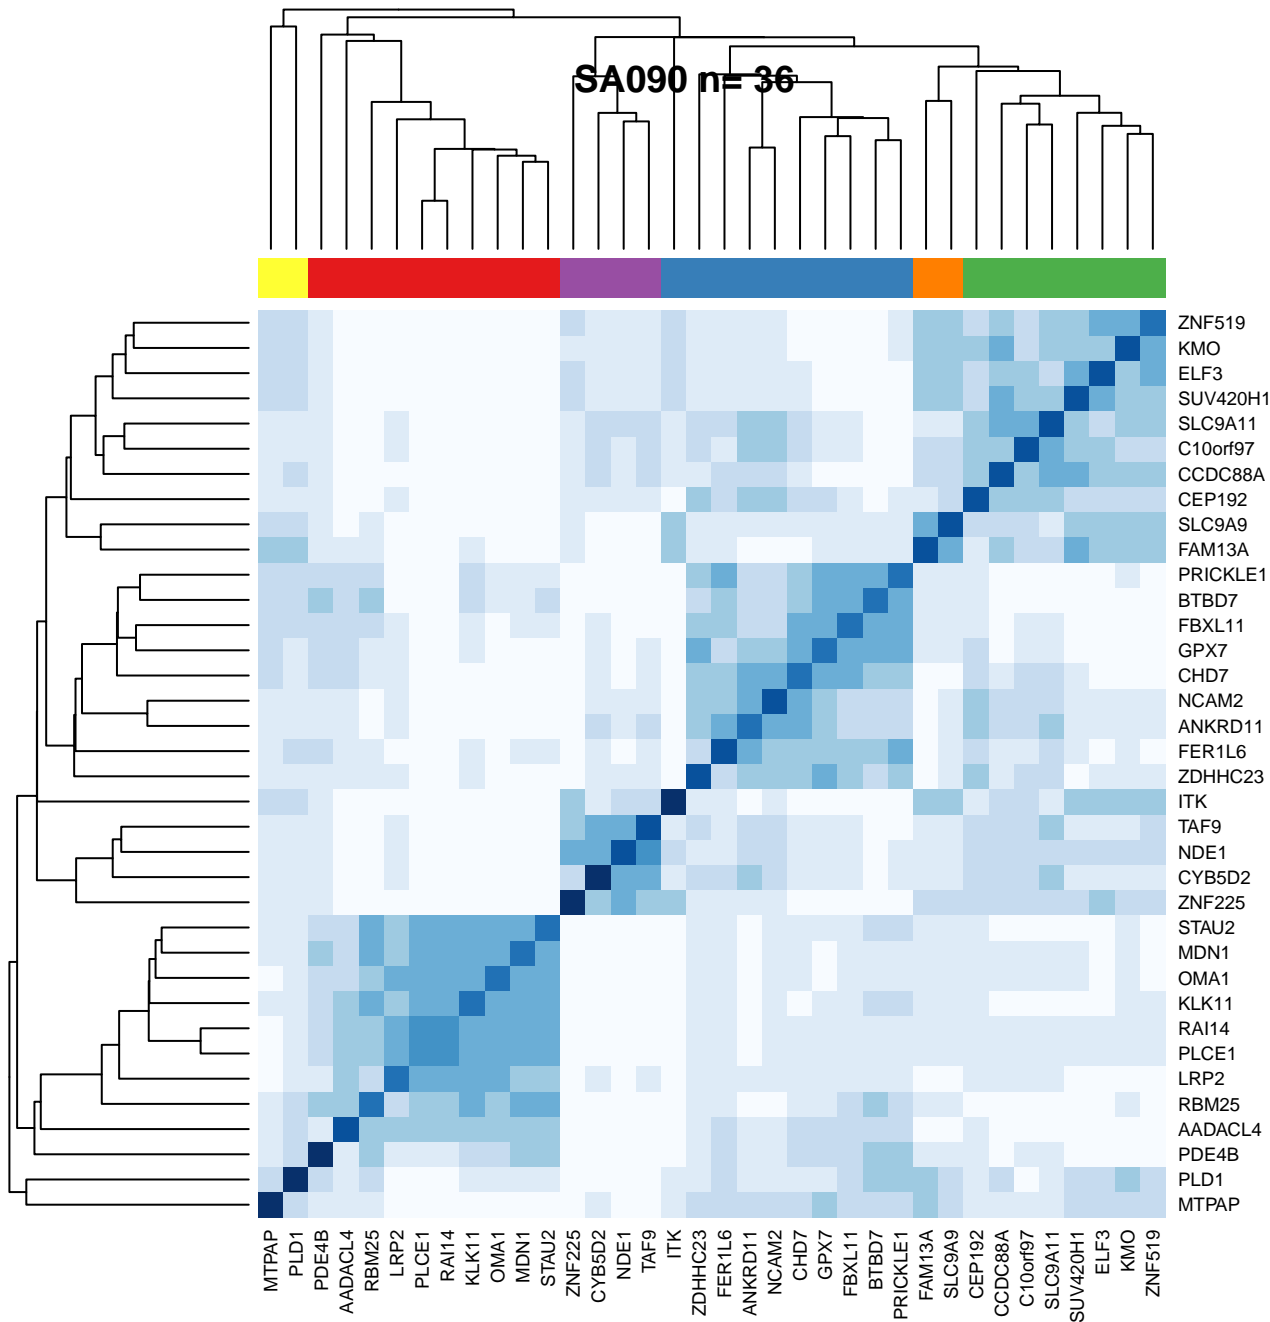

# SA090 n= 36

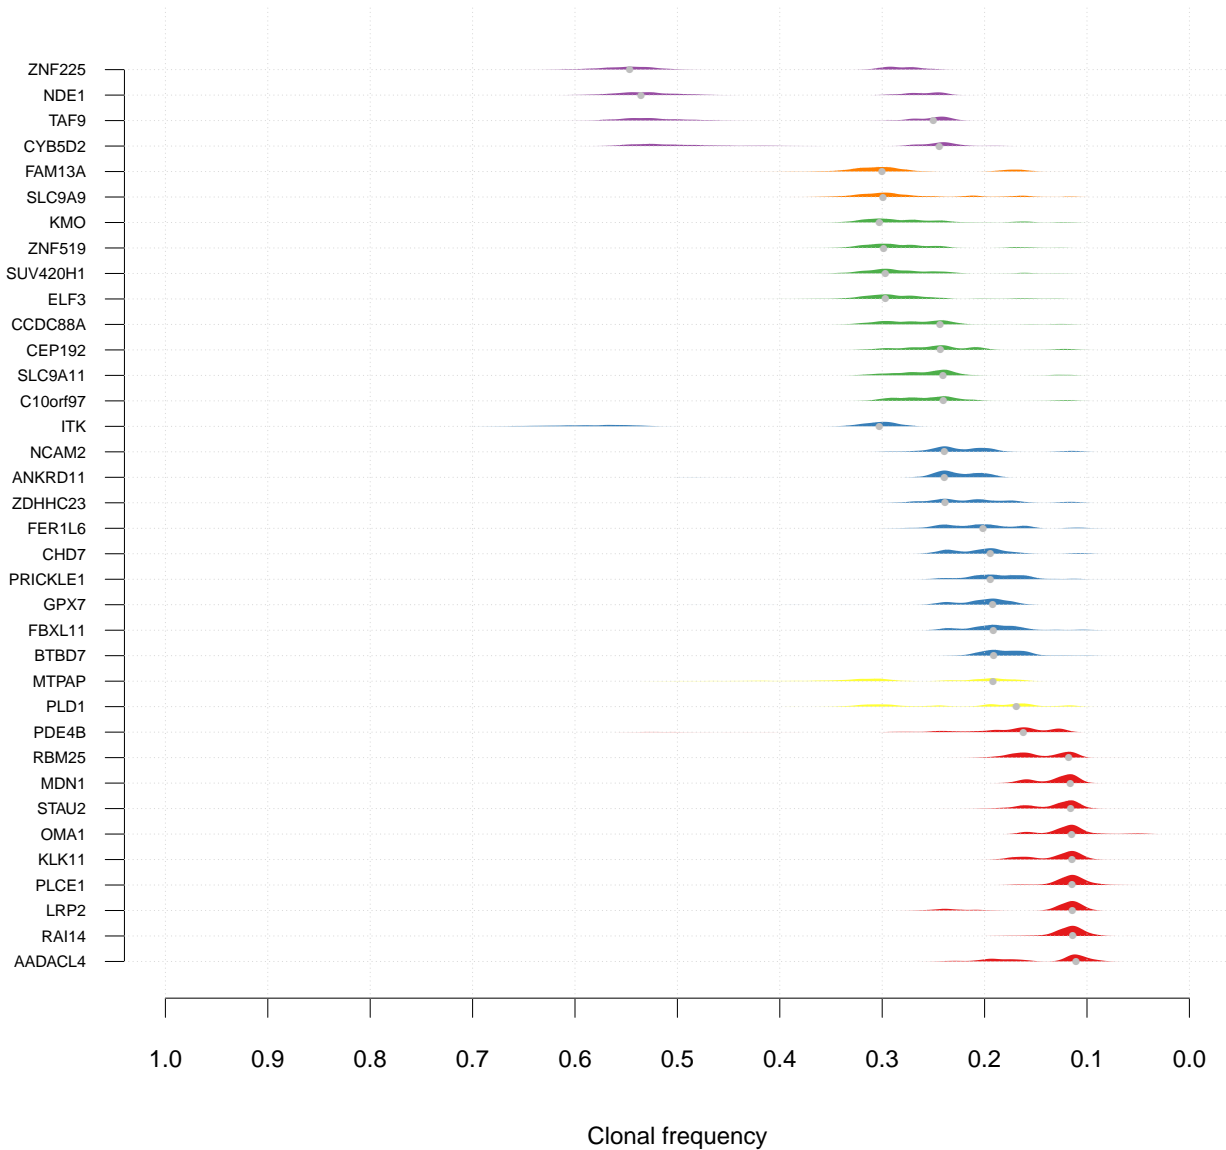

SA092 n= 66

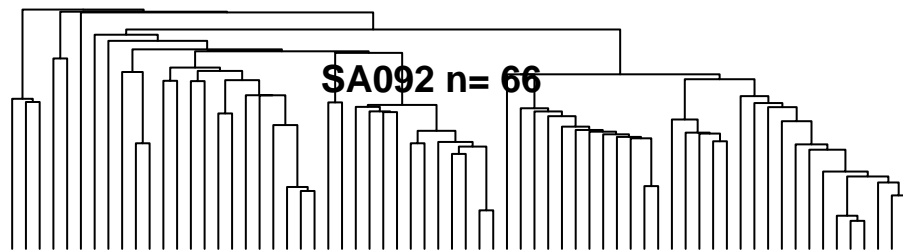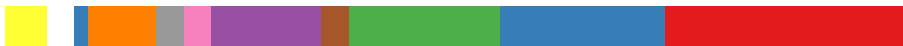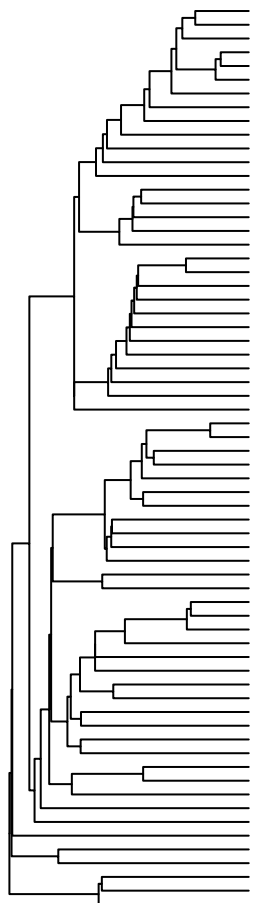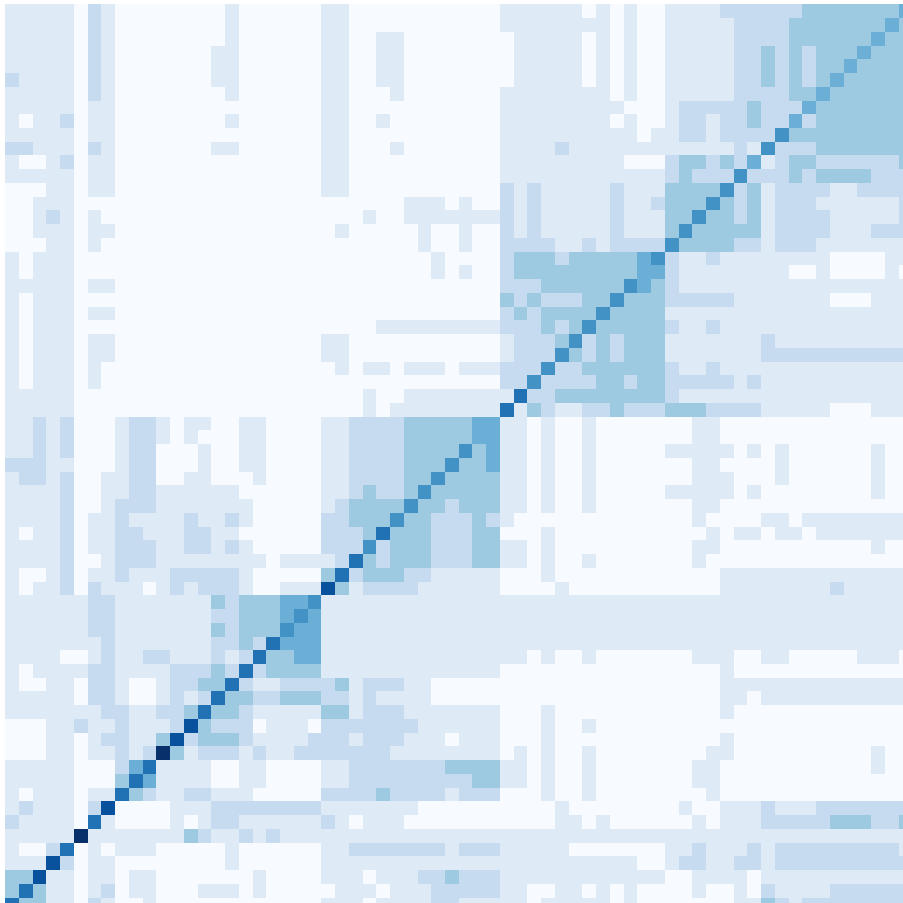

- AKAP11
- SMYD1
- DAGLB
- AP3D1
- TRPM1
- RANBP6
- SLC32A1
- PLA2G4D
- COO7
- RAPGEF2
- NET1
- AC025016.8
- CR2
- DPY5
- GADL1
- FDXACB1
- CCDC144A
- DPYSL3
- DOCK3
- FSD1
- DEFB132
- KIAA1522
- TG
- PRRT3
- CCT7
- ZNF862
- MUC4
- ZHX1
- TIAM1
- ZNF430
- TP53
- C6orf97
- ITGA2B
- ALDH1A1
- C20orf185
- HECW1
- COPEB
- FRAS1
- ASPM
- SCN2A2
- CECR2
- KATC1
- RFC5
- CLCA1
- DPPA2
- ZFP11
- GTF3C4
- ITGA6
- NCOA4
- ELOVL2
- MADD
- TTC28
- THSD7B
- EML4
- COB12
- SORCS3
- AC024935.34-1
- RAPGEF5
- ACE
- TMEM132A
- SAMD8
- EYA1
- TRPC3
- LRRC57
- TBC1D7

- TBC1D7
- LRRC57
- TRPM1
- EYA1
- SAMD8
- TMEM132A
- RAPGEF5
- ACE
- SORCS3
- CCOB12
- EML4
- THSD7B
- TTC28
- MADD
- ELOVL2
- ITGA6
- GTF3C4
- ZFP11
- DPPA2
- CLCA1
- KATC1
- CECR2
- SCN2A2
- ASPM
- FRAS1
- COPEB
- HECW1
- C20orf185
- ALDH1A1
- ITGA2B
- C6orf97
- TP53
- ZNF430
- ZHX1
- TIAM1
- MUC4
- ZNF862
- CCT7
- PRRT3
- TG
- KIAA1522
- DEFB132
- ALMS1
- FSD1
- DOCK3
- DPYSL3
- CCDC144A
- FDXACB1
- RANBP6
- DPY5
- CR2
- AC025016.8
- NET1
- RAPGEF2
- PLA2G4D
- SLC32A1
- RANBP6
- TRPM1
- AP3D1
- DAGLB
- SMYD1
- AKAP11

# SA092 n= 66

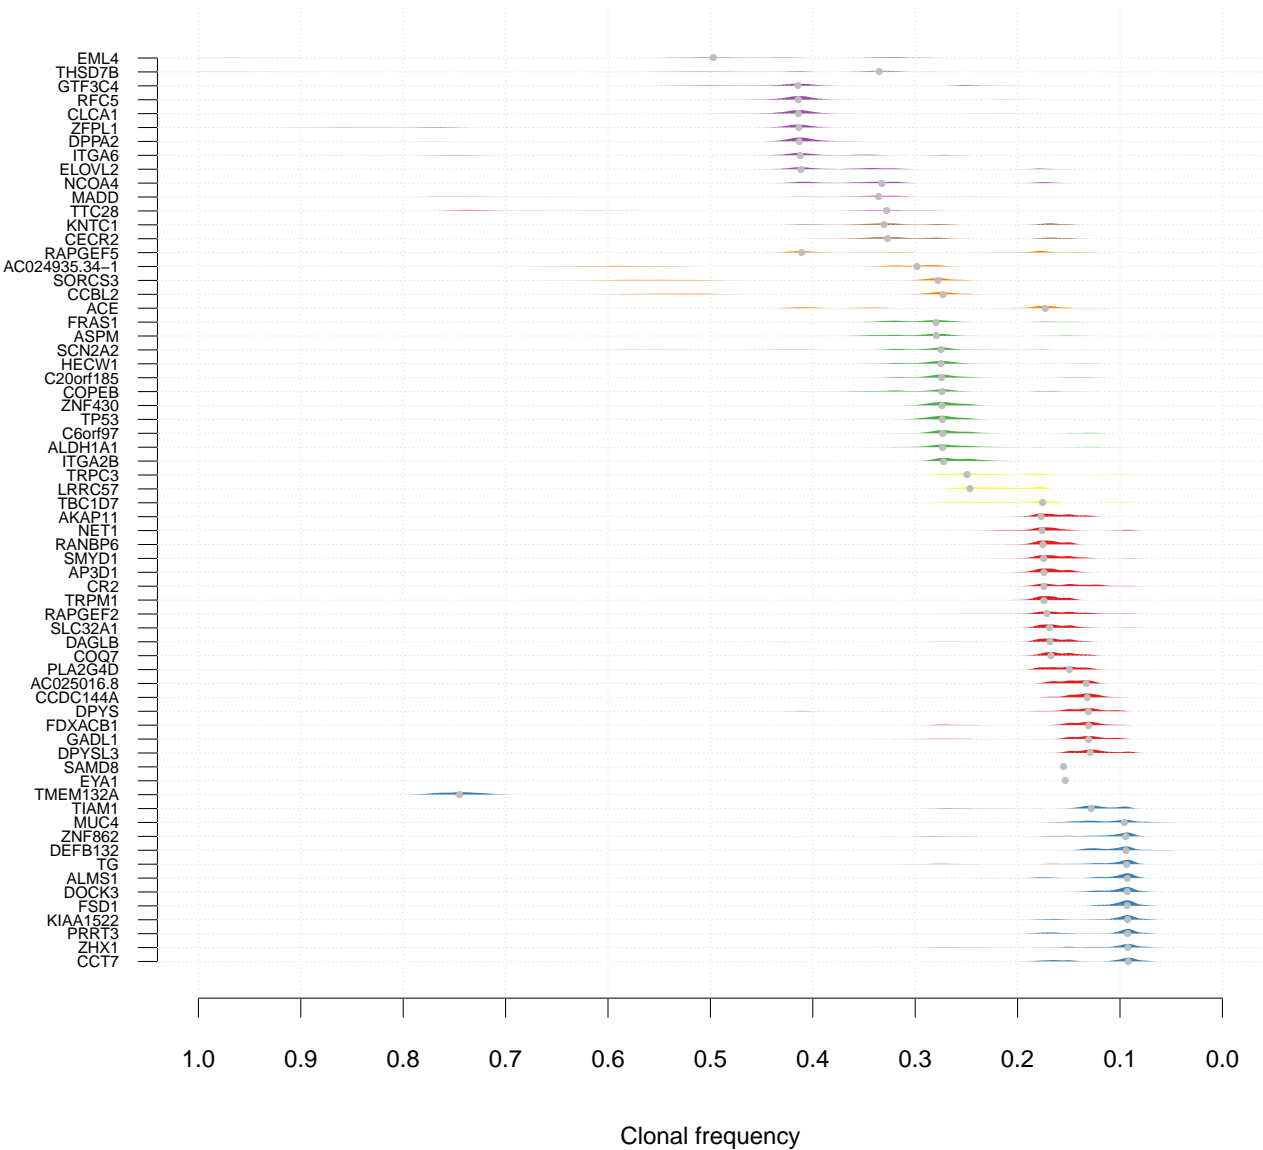



# SA093 n= 17

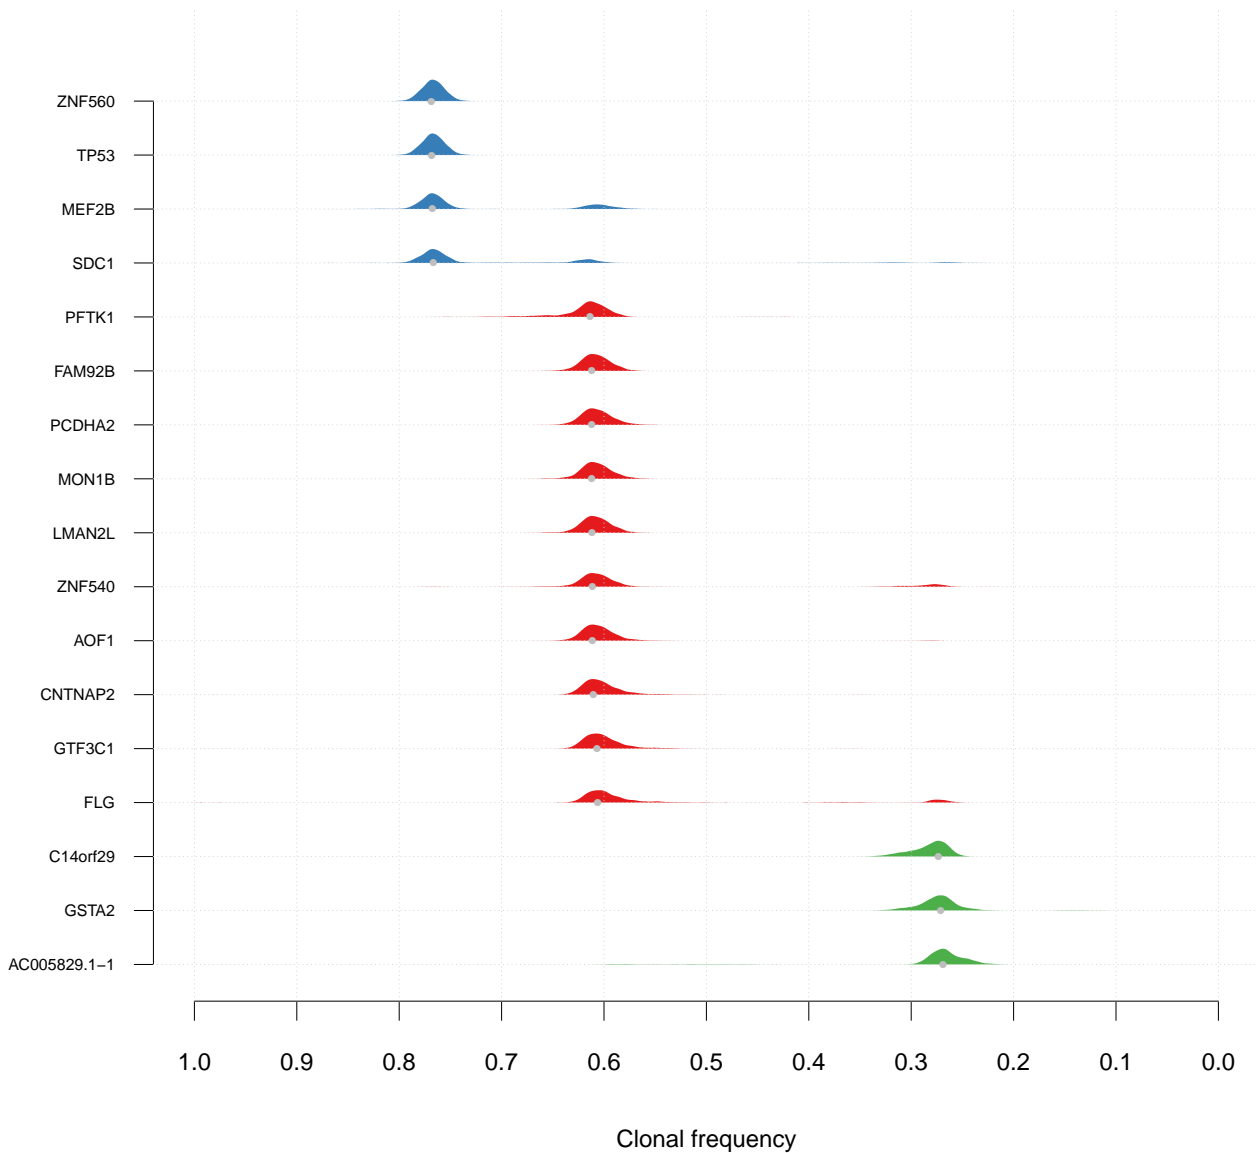



SA094 n= 26

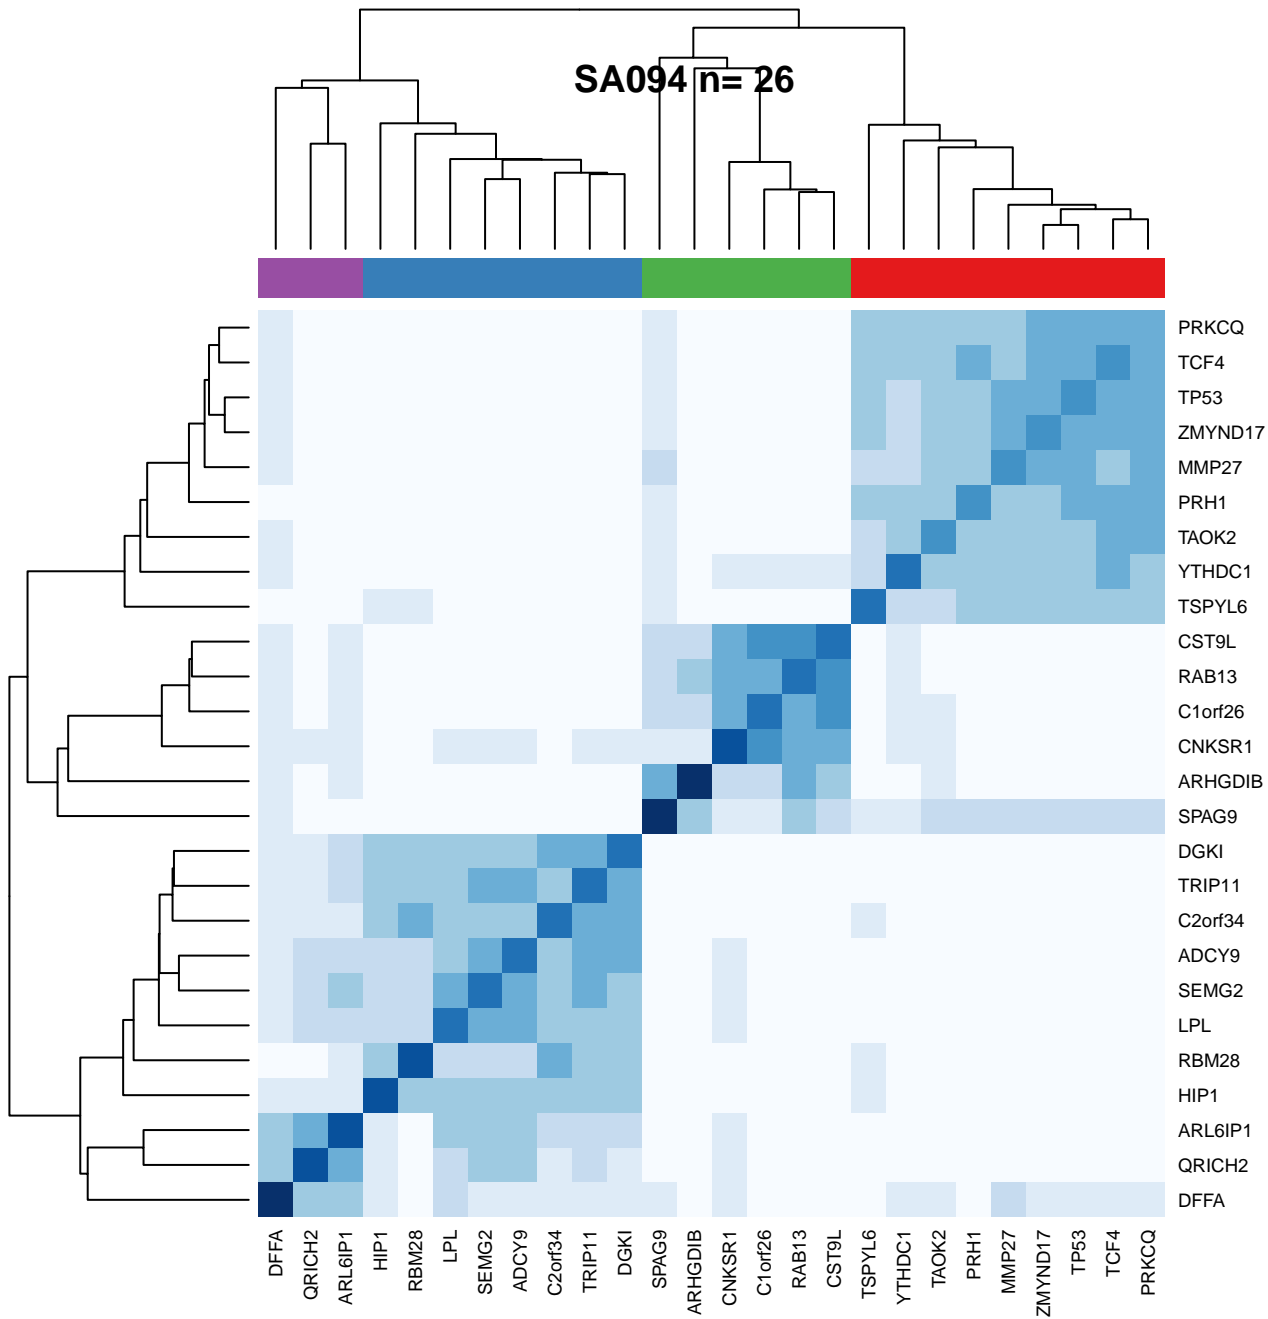

# SA094 n= 26

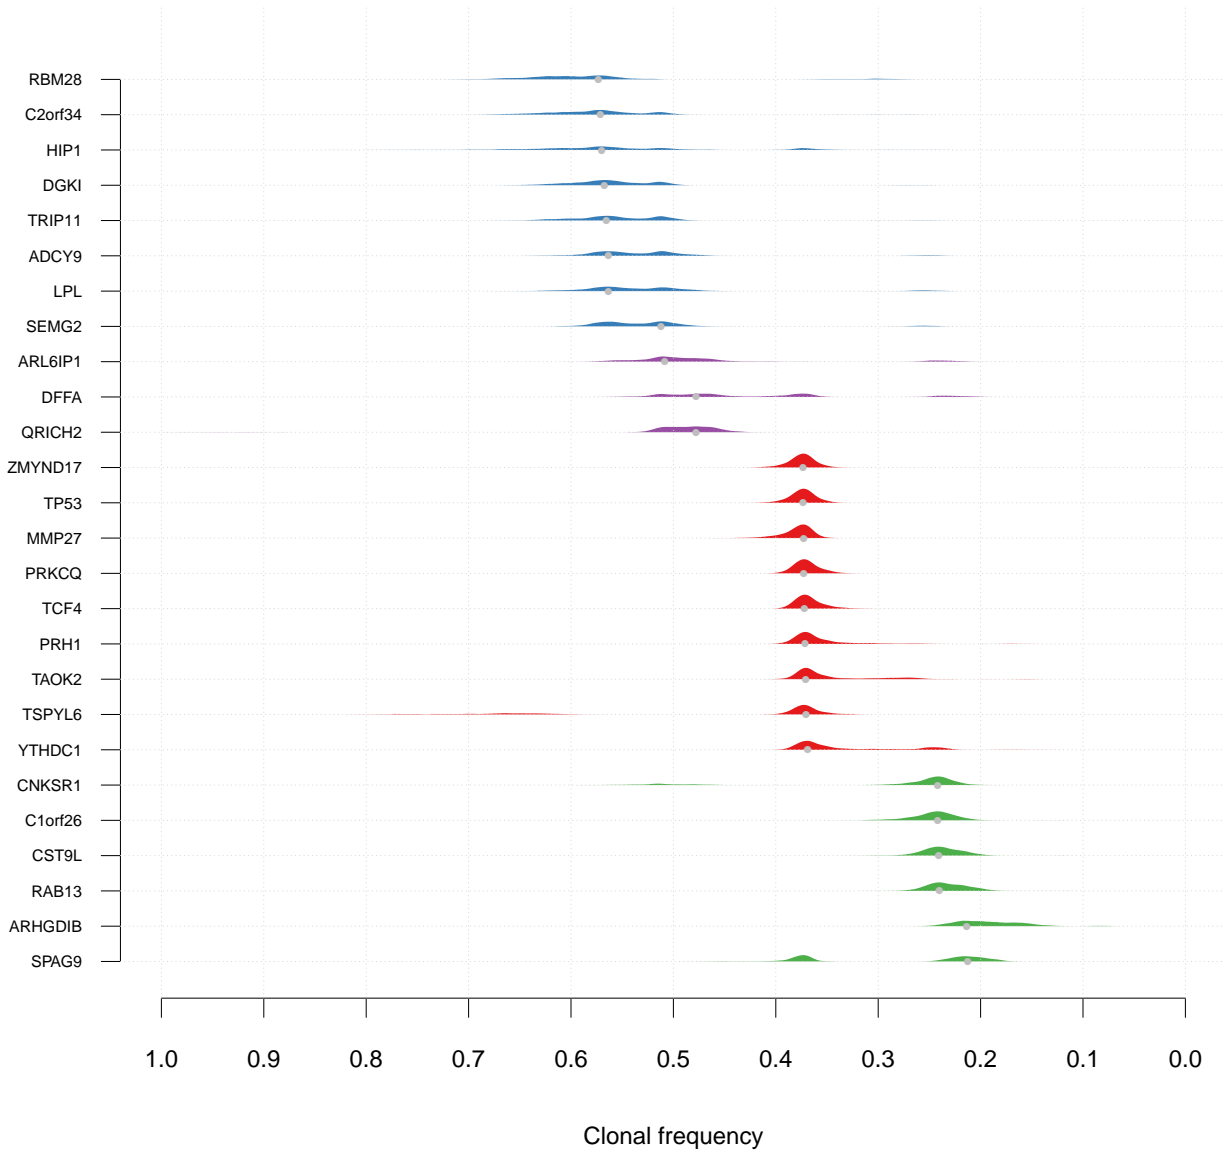



# SA096 n= 10

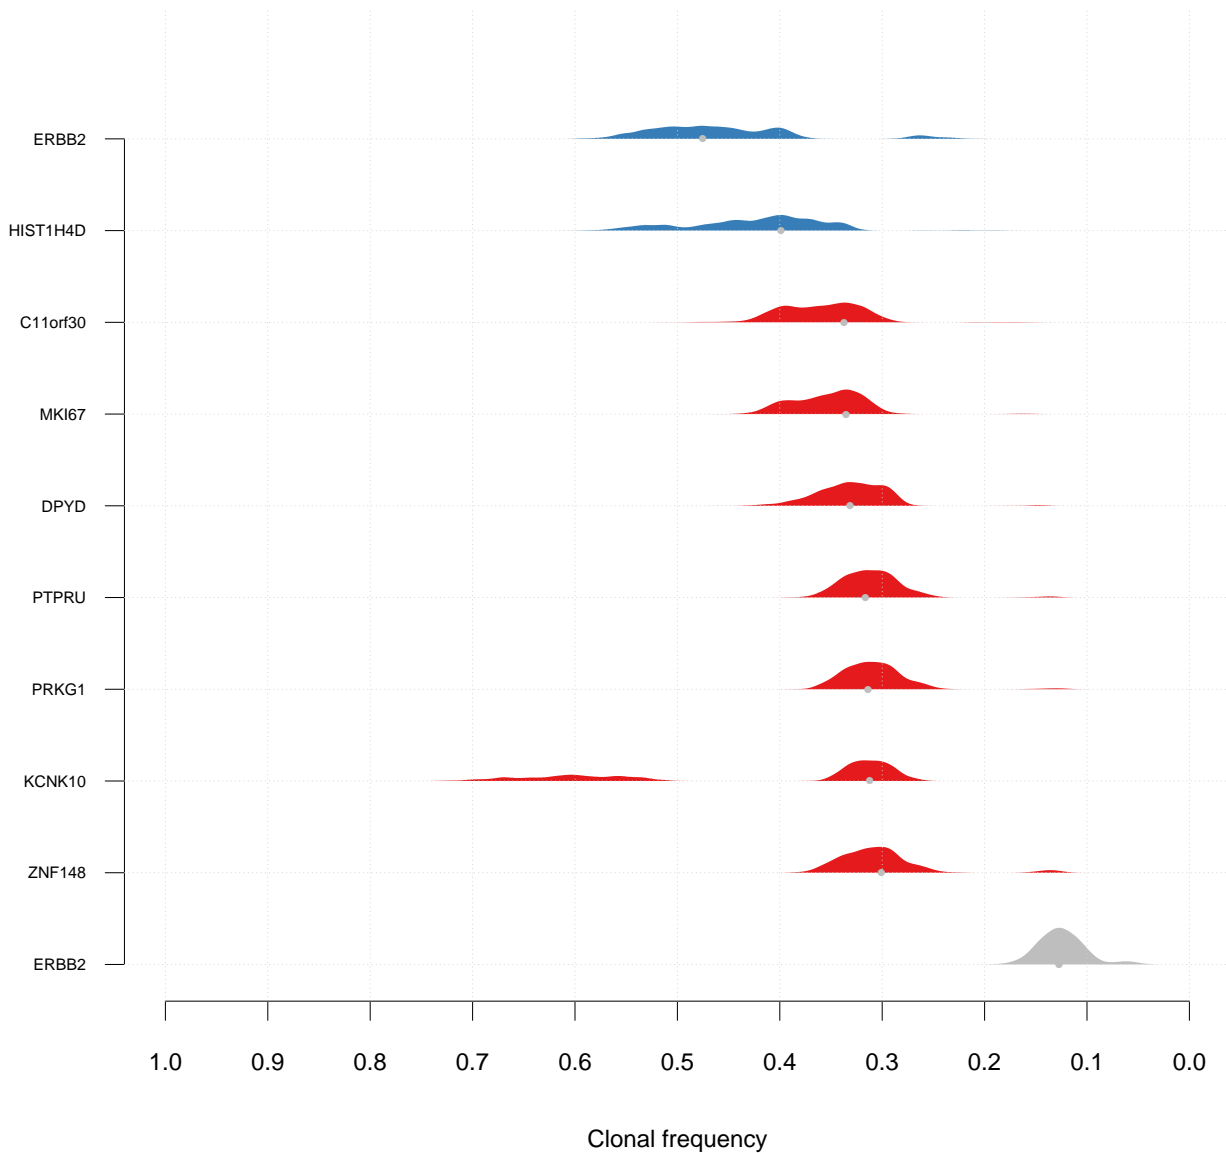

SA097 n= 46

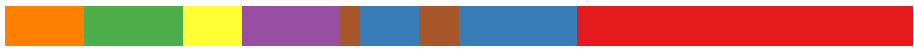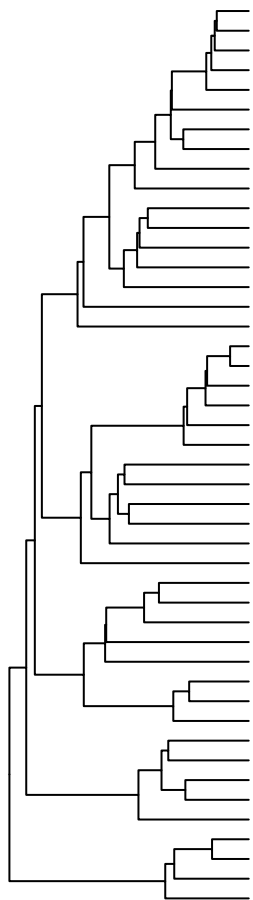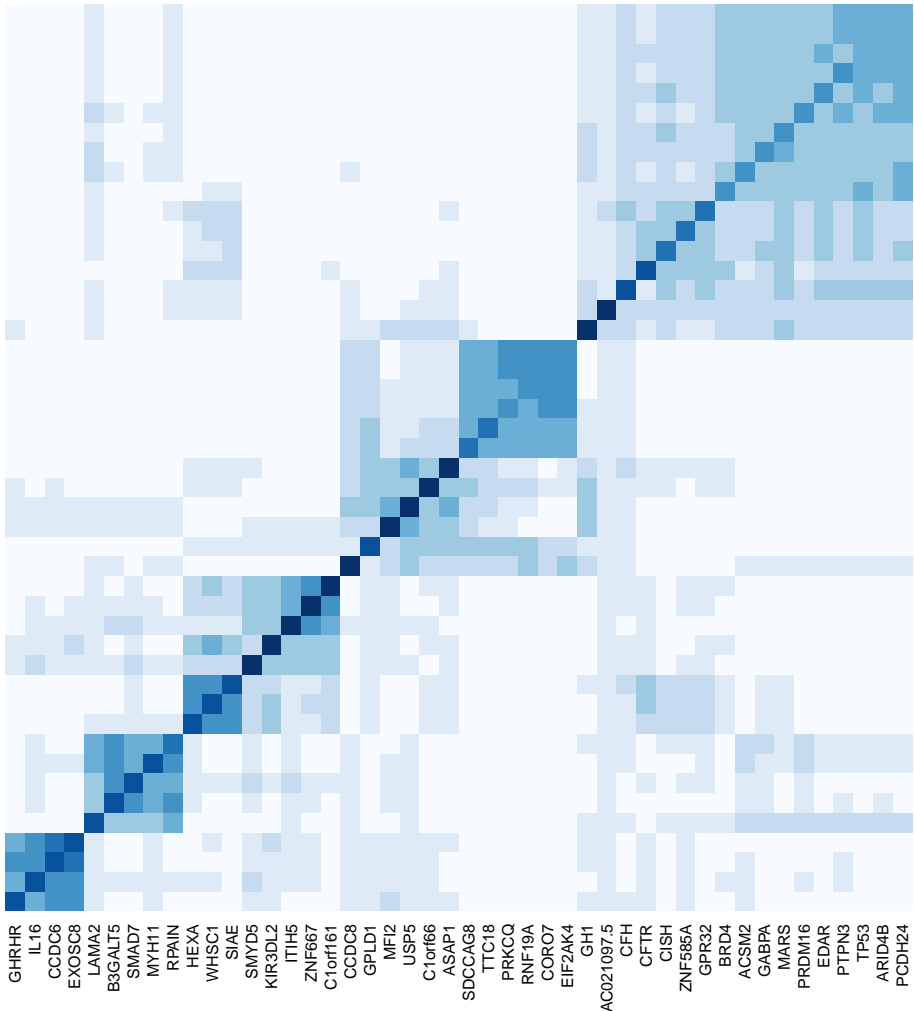

- PCDH24
- ARID4B
- TP53
- PTPN3
- EDAR
- PRDM16
- MARS
- GABPA
- ACSM2
- BRD4
- GPR32
- ZNF585A
- CISH
- CFTR
- CFH
- AC021097.5
- GH1
- EIF2AK4
- CORO7
- RNF19A
- PRKCC
- TTC18
- SDCCAG8
- ASAP1
- C1orf66
- USP5
- MF12
- GPLD1
- CCDC8
- C1orf161
- ZNF667
- ITIH5
- KIR3DL2
- SMYD5
- SIAE
- WHSC1
- HEXA
- RPAIN
- MYH11
- SMAD7
- B3GALT5
- LAMA2
- EXOSC8
- CCDC6
- IL16
- GHRHR

# SA097 n= 46

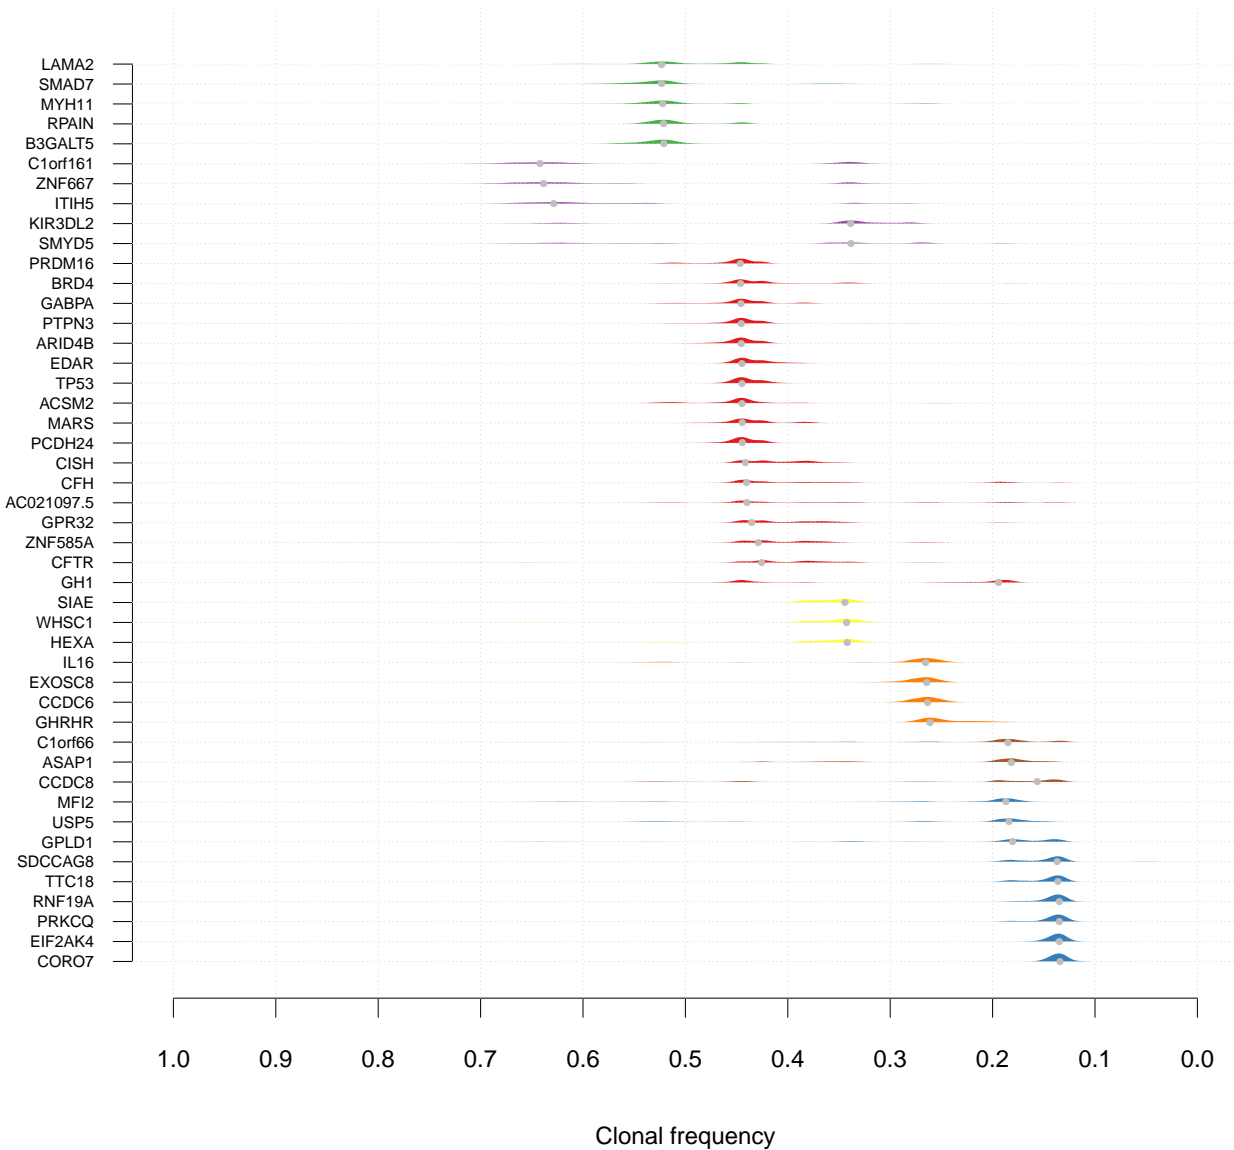



# SA098 n= 22

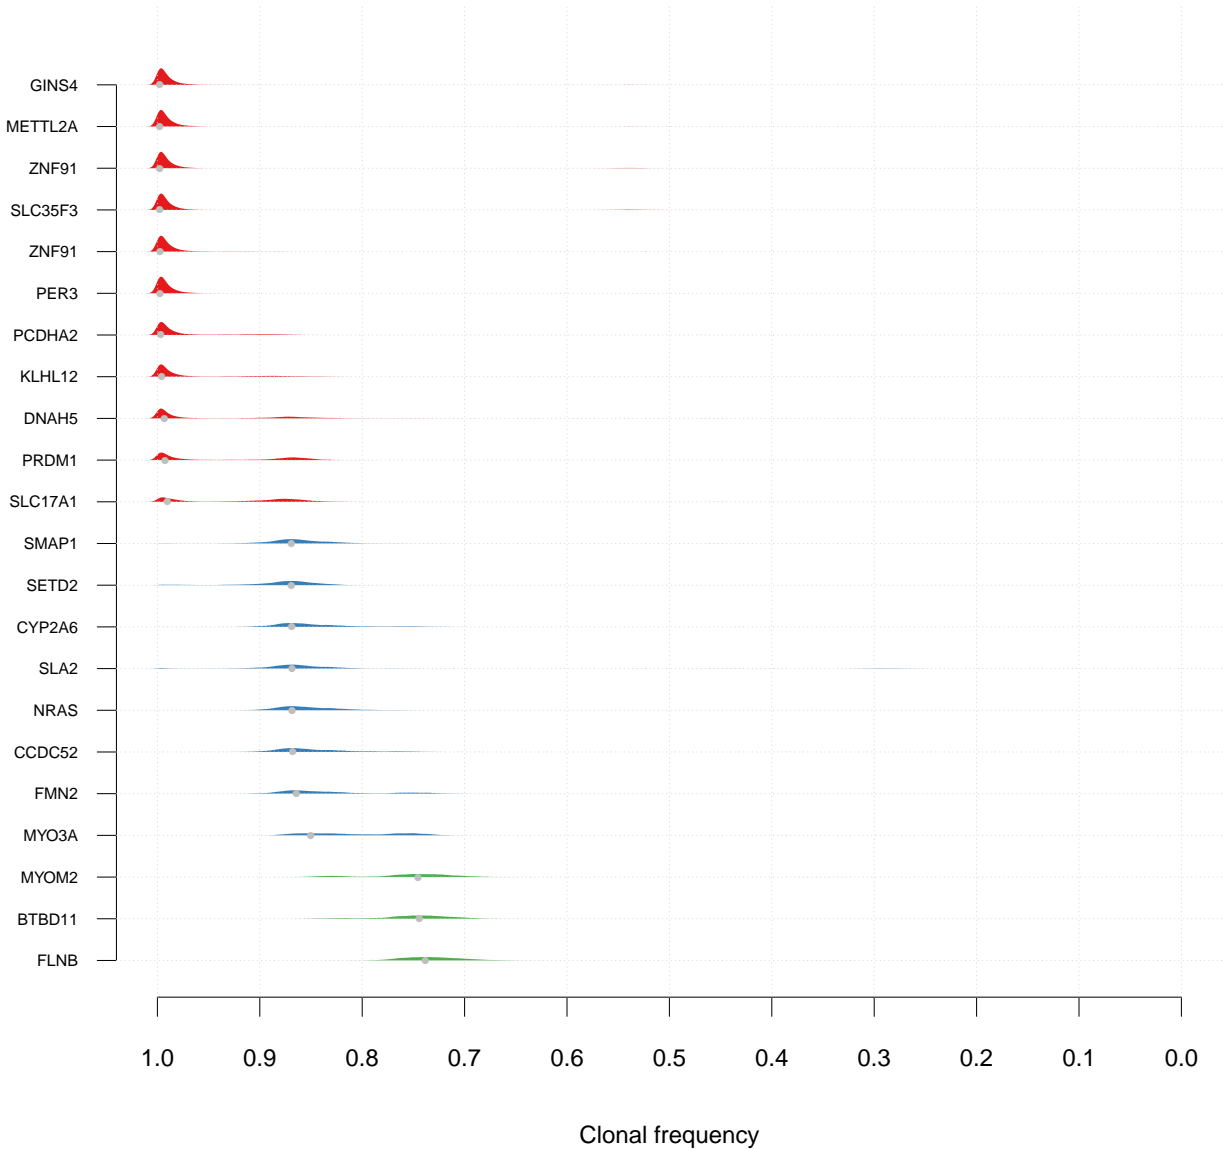





# SA101 n= 18

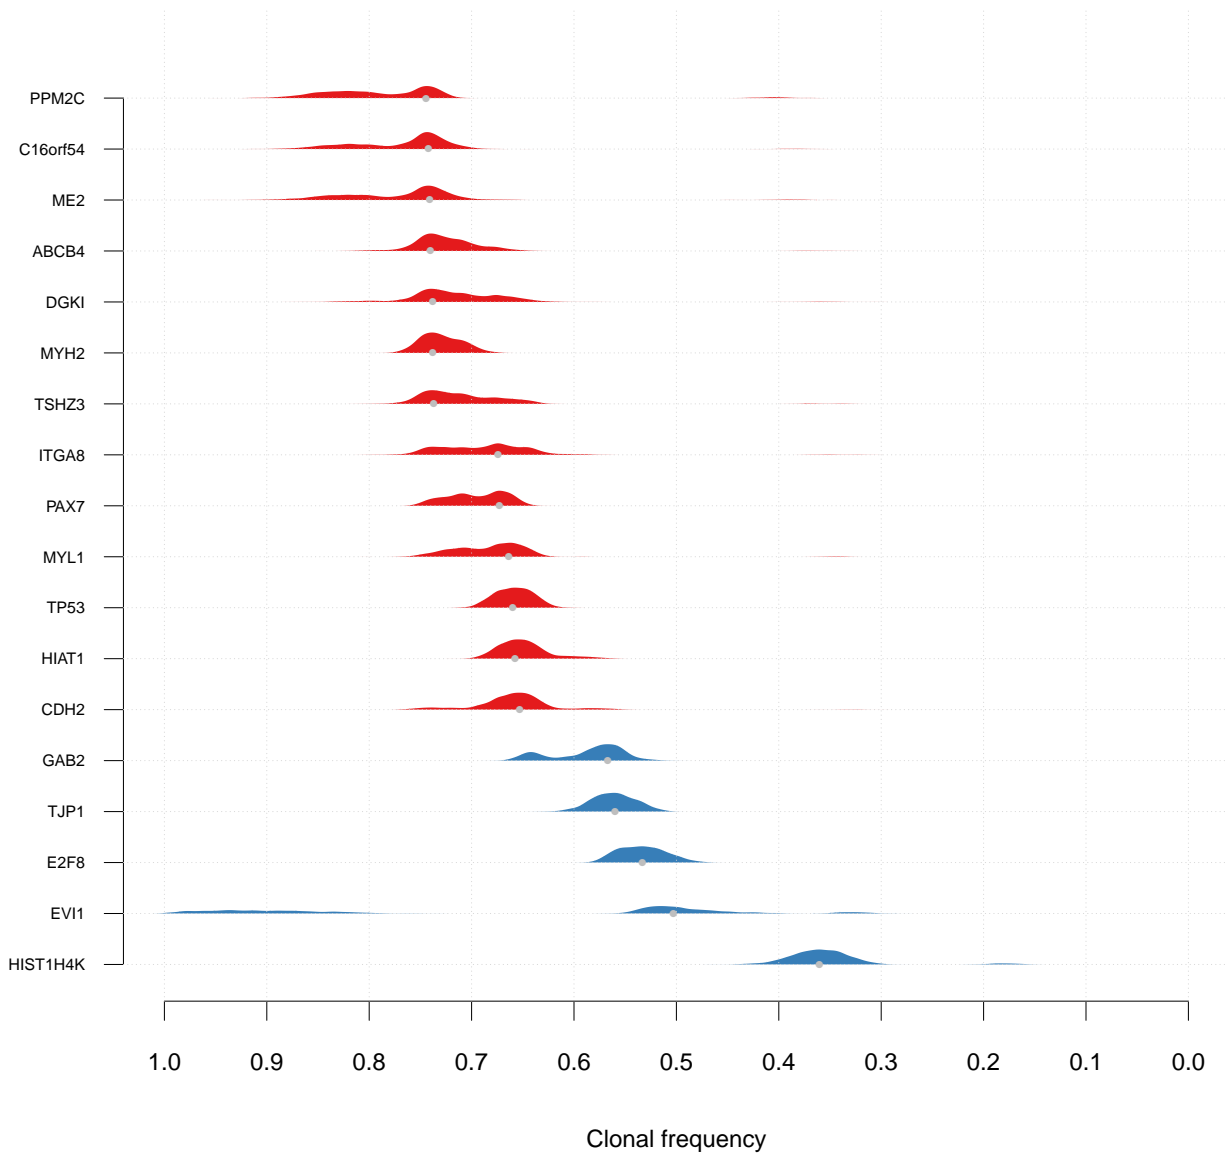

SA102 n= 24

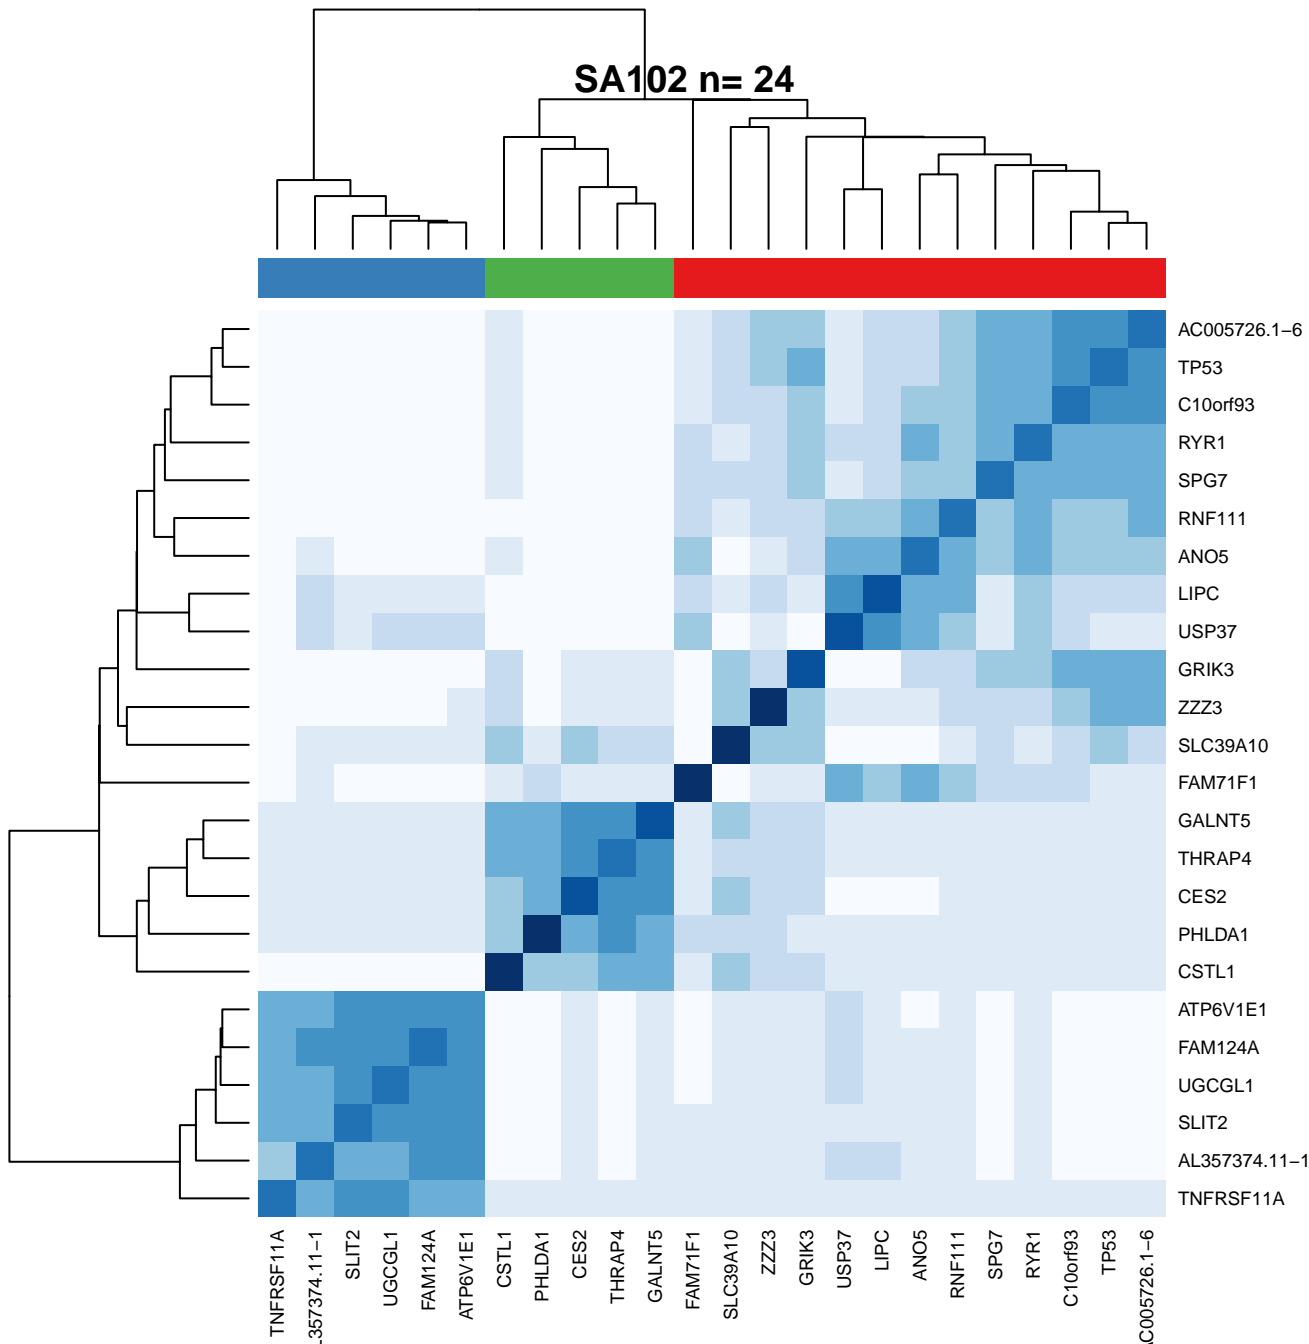

# SA102 n= 24

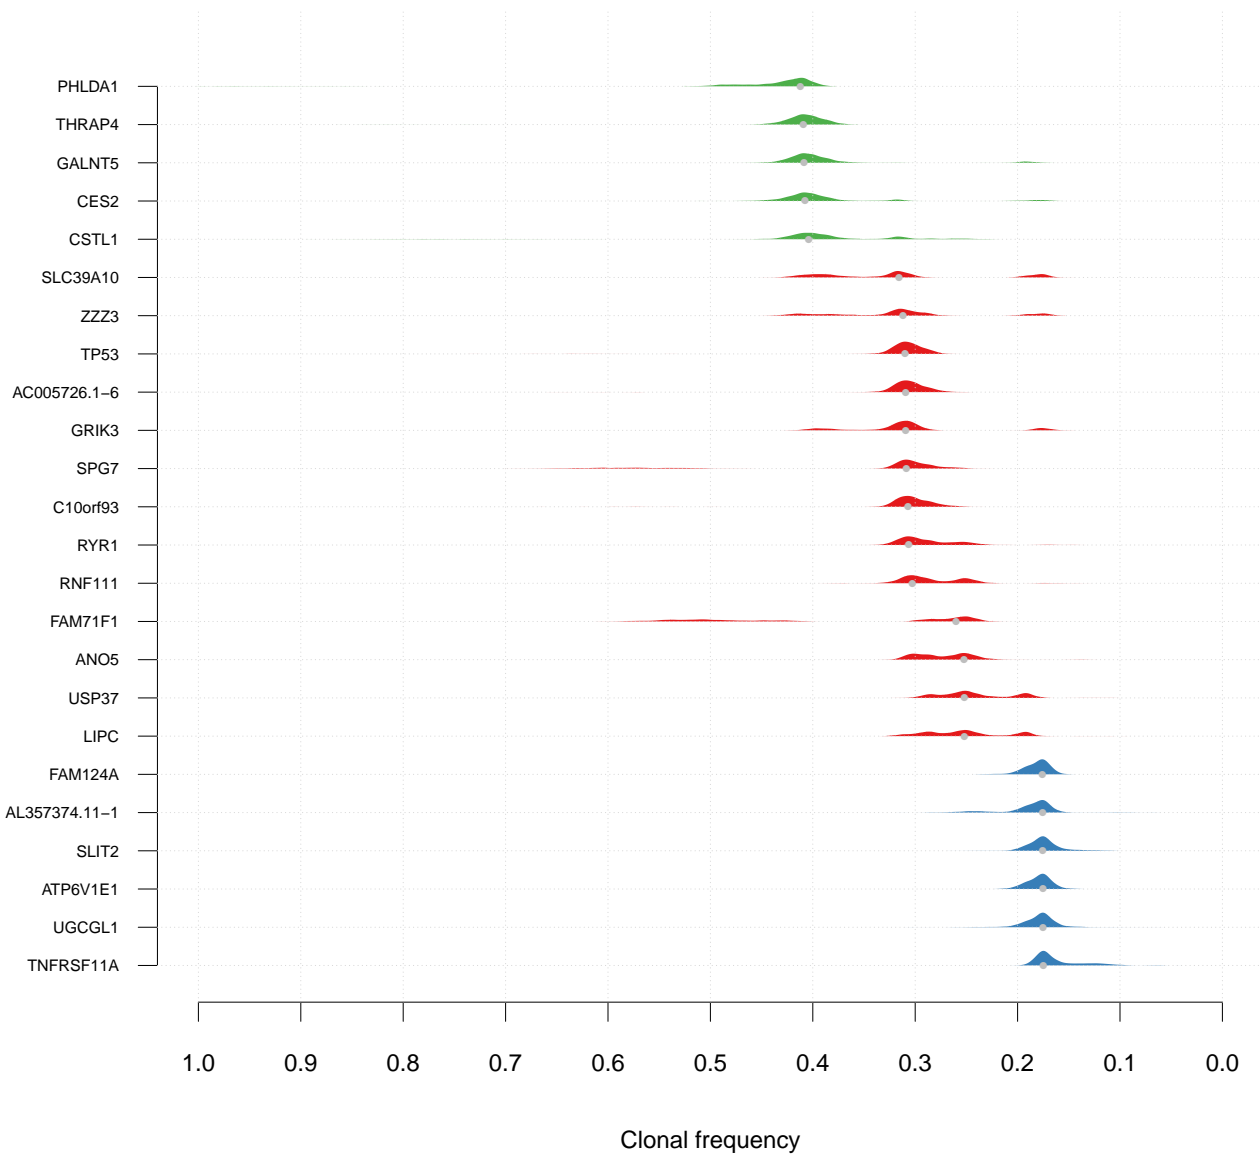

SA103 n= 15

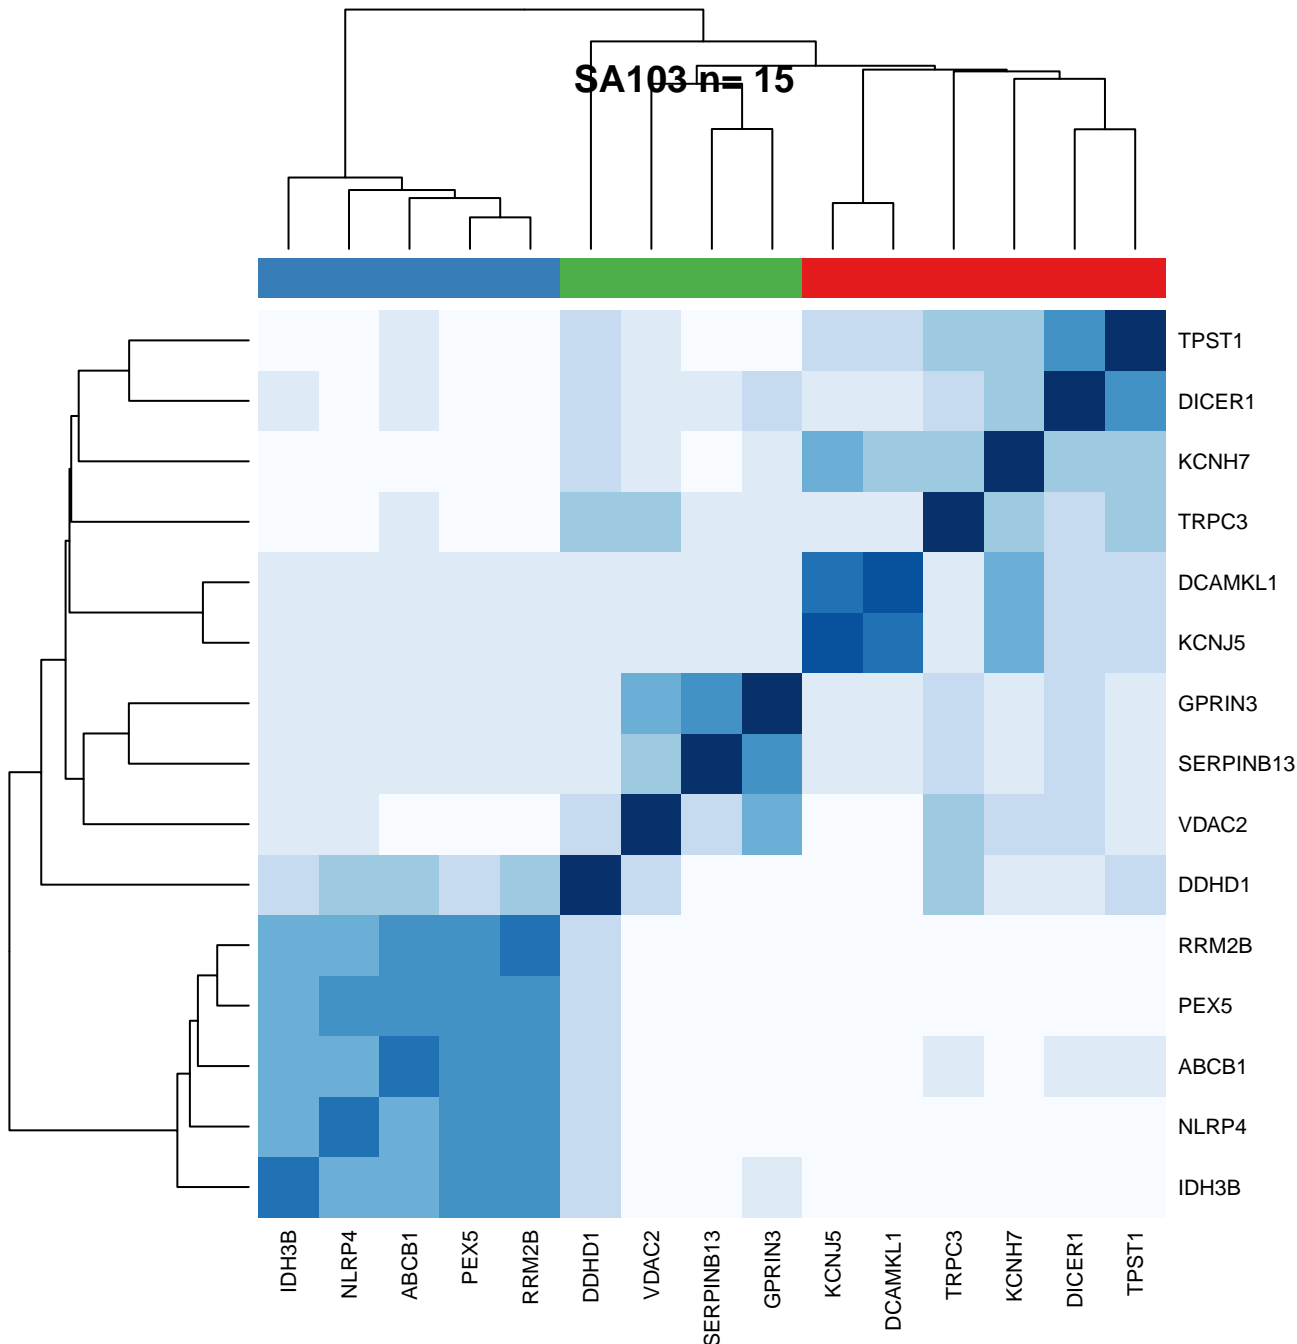

# SA103 n= 15

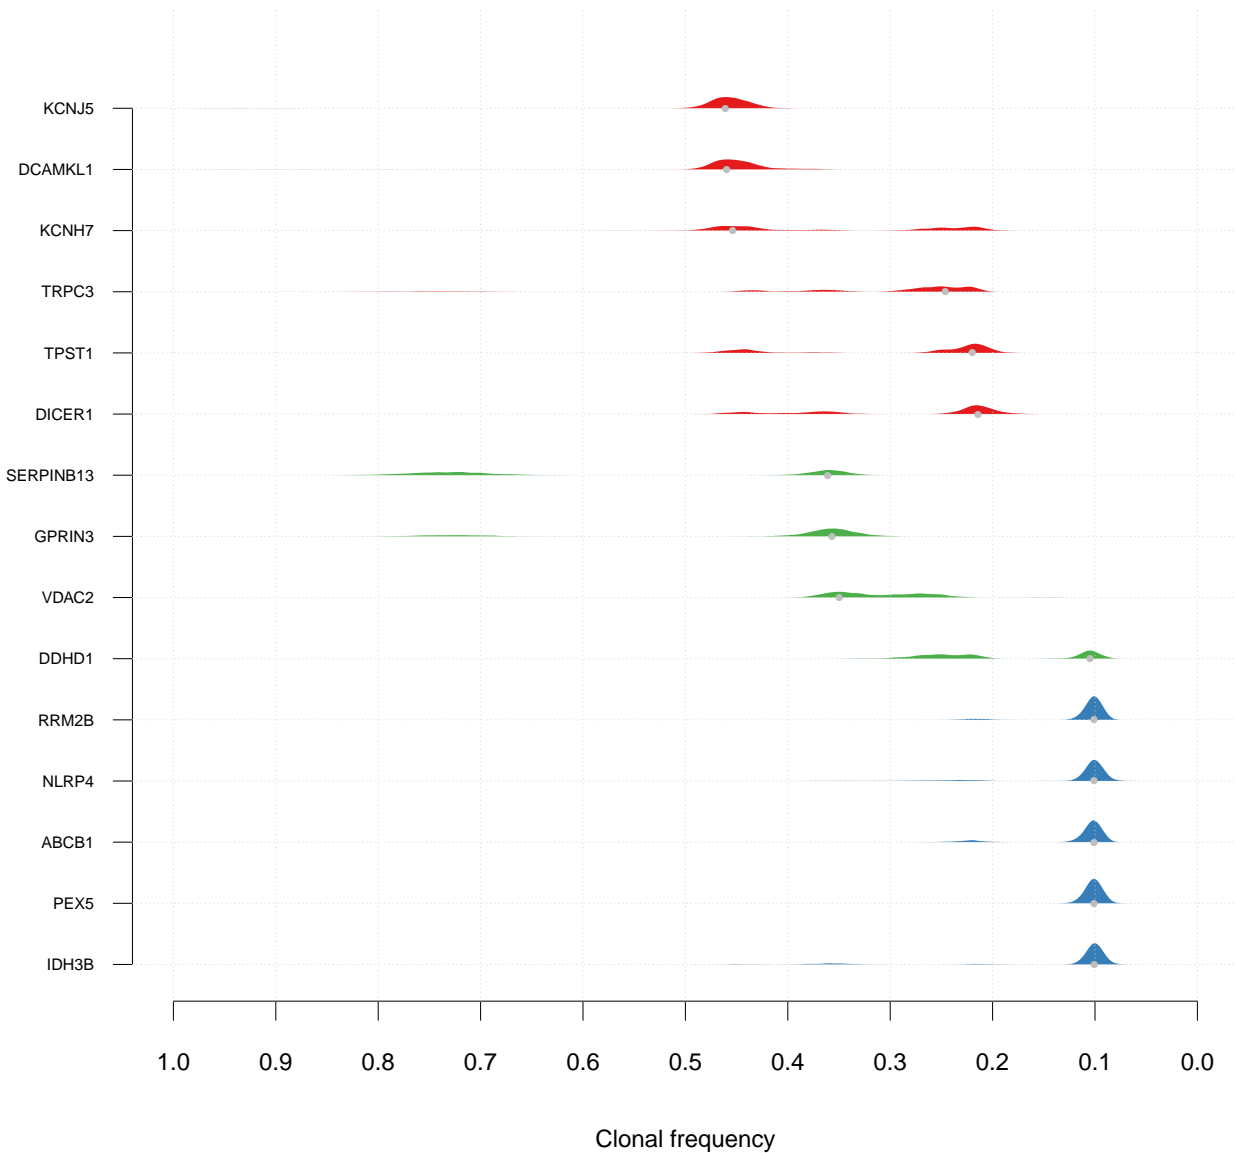

SA106 n= 132

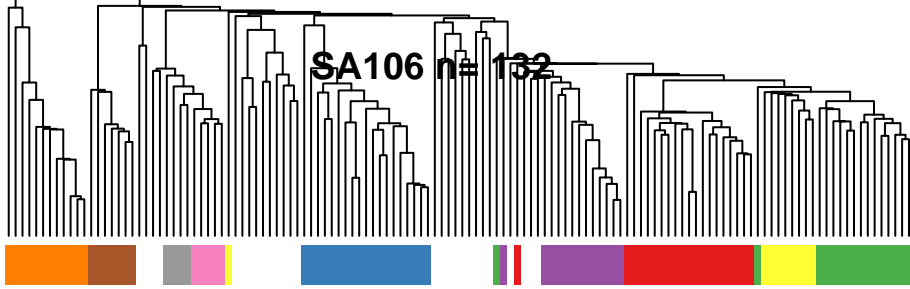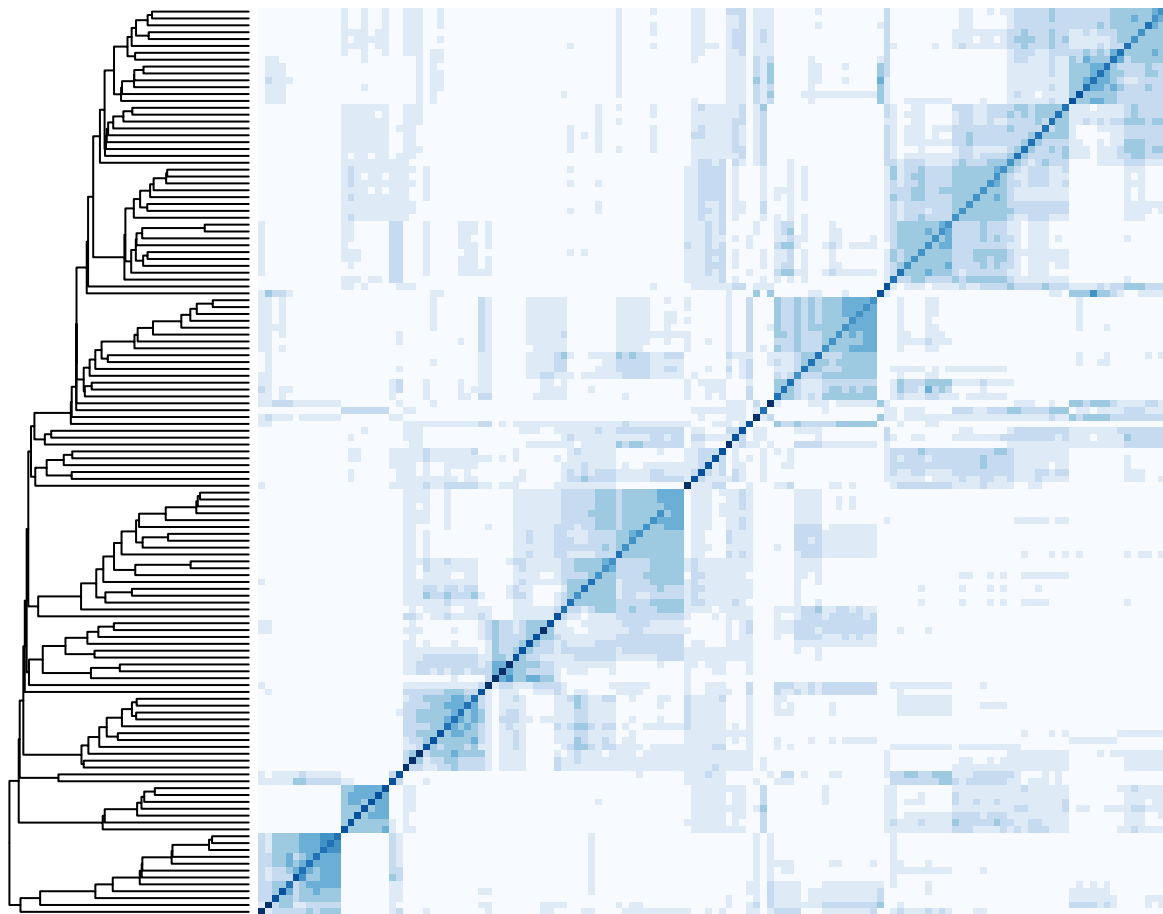

AOE2R1  
LBB5  
VAB2R1  
VAB2R4  
VAB2R4D1  
VAB2R4D2  
VAB2R4D3  
VAB2R4D4  
VAB2R4D5  
VAB2R4D6  
VAB2R4D7  
VAB2R4D8  
VAB2R4D9  
VAB2R4D10  
VAB2R4D11  
VAB2R4D12  
VAB2R4D13  
VAB2R4D14  
VAB2R4D15  
VAB2R4D16  
VAB2R4D17  
VAB2R4D18  
VAB2R4D19  
VAB2R4D20  
VAB2R4D21  
VAB2R4D22  
VAB2R4D23  
VAB2R4D24  
VAB2R4D25  
VAB2R4D26  
VAB2R4D27  
VAB2R4D28  
VAB2R4D29  
VAB2R4D30  
VAB2R4D31  
VAB2R4D32  
VAB2R4D33  
VAB2R4D34  
VAB2R4D35  
VAB2R4D36  
VAB2R4D37  
VAB2R4D38  
VAB2R4D39  
VAB2R4D40  
VAB2R4D41  
VAB2R4D42  
VAB2R4D43  
VAB2R4D44  
VAB2R4D45  
VAB2R4D46  
VAB2R4D47  
VAB2R4D48  
VAB2R4D49  
VAB2R4D50  
VAB2R4D51  
VAB2R4D52  
VAB2R4D53  
VAB2R4D54  
VAB2R4D55  
VAB2R4D56  
VAB2R4D57  
VAB2R4D58  
VAB2R4D59  
VAB2R4D60  
VAB2R4D61  
VAB2R4D62  
VAB2R4D63  
VAB2R4D64  
VAB2R4D65  
VAB2R4D66  
VAB2R4D67  
VAB2R4D68  
VAB2R4D69  
VAB2R4D70  
VAB2R4D71  
VAB2R4D72  
VAB2R4D73  
VAB2R4D74  
VAB2R4D75  
VAB2R4D76  
VAB2R4D77  
VAB2R4D78  
VAB2R4D79  
VAB2R4D80  
VAB2R4D81  
VAB2R4D82  
VAB2R4D83  
VAB2R4D84  
VAB2R4D85  
VAB2R4D86  
VAB2R4D87  
VAB2R4D88  
VAB2R4D89  
VAB2R4D90  
VAB2R4D91  
VAB2R4D92  
VAB2R4D93  
VAB2R4D94  
VAB2R4D95  
VAB2R4D96  
VAB2R4D97  
VAB2R4D98  
VAB2R4D99  
VAB2R4D100  
VAB2R4D101  
VAB2R4D102  
VAB2R4D103  
VAB2R4D104  
VAB2R4D105  
VAB2R4D106  
VAB2R4D107  
VAB2R4D108  
VAB2R4D109  
VAB2R4D110  
VAB2R4D111  
VAB2R4D112  
VAB2R4D113  
VAB2R4D114  
VAB2R4D115  
VAB2R4D116  
VAB2R4D117  
VAB2R4D118  
VAB2R4D119  
VAB2R4D120  
VAB2R4D121  
VAB2R4D122  
VAB2R4D123  
VAB2R4D124  
VAB2R4D125  
VAB2R4D126  
VAB2R4D127  
VAB2R4D128  
VAB2R4D129  
VAB2R4D130  
VAB2R4D131  
VAB2R4D132

CGCB  
RIB2  
ZNF103  
ZNF103-AS1  
CCND3  
TNN3  
ZNF103-AS2  
ZNF103-AS3  
ZNF103-AS4  
ZNF103-AS5  
ZNF103-AS6  
ZNF103-AS7  
ZNF103-AS8  
ZNF103-AS9  
ZNF103-AS10  
ZNF103-AS11  
ZNF103-AS12  
ZNF103-AS13  
ZNF103-AS14  
ZNF103-AS15  
ZNF103-AS16  
ZNF103-AS17  
ZNF103-AS18  
ZNF103-AS19  
ZNF103-AS20  
ZNF103-AS21  
ZNF103-AS22  
ZNF103-AS23  
ZNF103-AS24  
ZNF103-AS25  
ZNF103-AS26  
ZNF103-AS27  
ZNF103-AS28  
ZNF103-AS29  
ZNF103-AS30  
ZNF103-AS31  
ZNF103-AS32  
ZNF103-AS33  
ZNF103-AS34  
ZNF103-AS35  
ZNF103-AS36  
ZNF103-AS37  
ZNF103-AS38  
ZNF103-AS39  
ZNF103-AS40  
ZNF103-AS41  
ZNF103-AS42  
ZNF103-AS43  
ZNF103-AS44  
ZNF103-AS45  
ZNF103-AS46  
ZNF103-AS47  
ZNF103-AS48  
ZNF103-AS49  
ZNF103-AS50  
ZNF103-AS51  
ZNF103-AS52  
ZNF103-AS53  
ZNF103-AS54  
ZNF103-AS55  
ZNF103-AS56  
ZNF103-AS57  
ZNF103-AS58  
ZNF103-AS59  
ZNF103-AS60  
ZNF103-AS61  
ZNF103-AS62  
ZNF103-AS63  
ZNF103-AS64  
ZNF103-AS65  
ZNF103-AS66  
ZNF103-AS67  
ZNF103-AS68  
ZNF103-AS69  
ZNF103-AS70  
ZNF103-AS71  
ZNF103-AS72  
ZNF103-AS73  
ZNF103-AS74  
ZNF103-AS75  
ZNF103-AS76  
ZNF103-AS77  
ZNF103-AS78  
ZNF103-AS79  
ZNF103-AS80  
ZNF103-AS81  
ZNF103-AS82  
ZNF103-AS83  
ZNF103-AS84  
ZNF103-AS85  
ZNF103-AS86  
ZNF103-AS87  
ZNF103-AS88  
ZNF103-AS89  
ZNF103-AS90  
ZNF103-AS91  
ZNF103-AS92  
ZNF103-AS93  
ZNF103-AS94  
ZNF103-AS95  
ZNF103-AS96  
ZNF103-AS97  
ZNF103-AS98  
ZNF103-AS99  
ZNF103-AS100  
ZNF103-AS101  
ZNF103-AS102  
ZNF103-AS103  
ZNF103-AS104  
ZNF103-AS105  
ZNF103-AS106  
ZNF103-AS107  
ZNF103-AS108  
ZNF103-AS109  
ZNF103-AS110  
ZNF103-AS111  
ZNF103-AS112  
ZNF103-AS113  
ZNF103-AS114  
ZNF103-AS115  
ZNF103-AS116  
ZNF103-AS117  
ZNF103-AS118  
ZNF103-AS119  
ZNF103-AS120  
ZNF103-AS121  
ZNF103-AS122  
ZNF103-AS123  
ZNF103-AS124  
ZNF103-AS125  
ZNF103-AS126  
ZNF103-AS127  
ZNF103-AS128  
ZNF103-AS129  
ZNF103-AS130  
ZNF103-AS131  
ZNF103-AS132

# SA106 n= 132

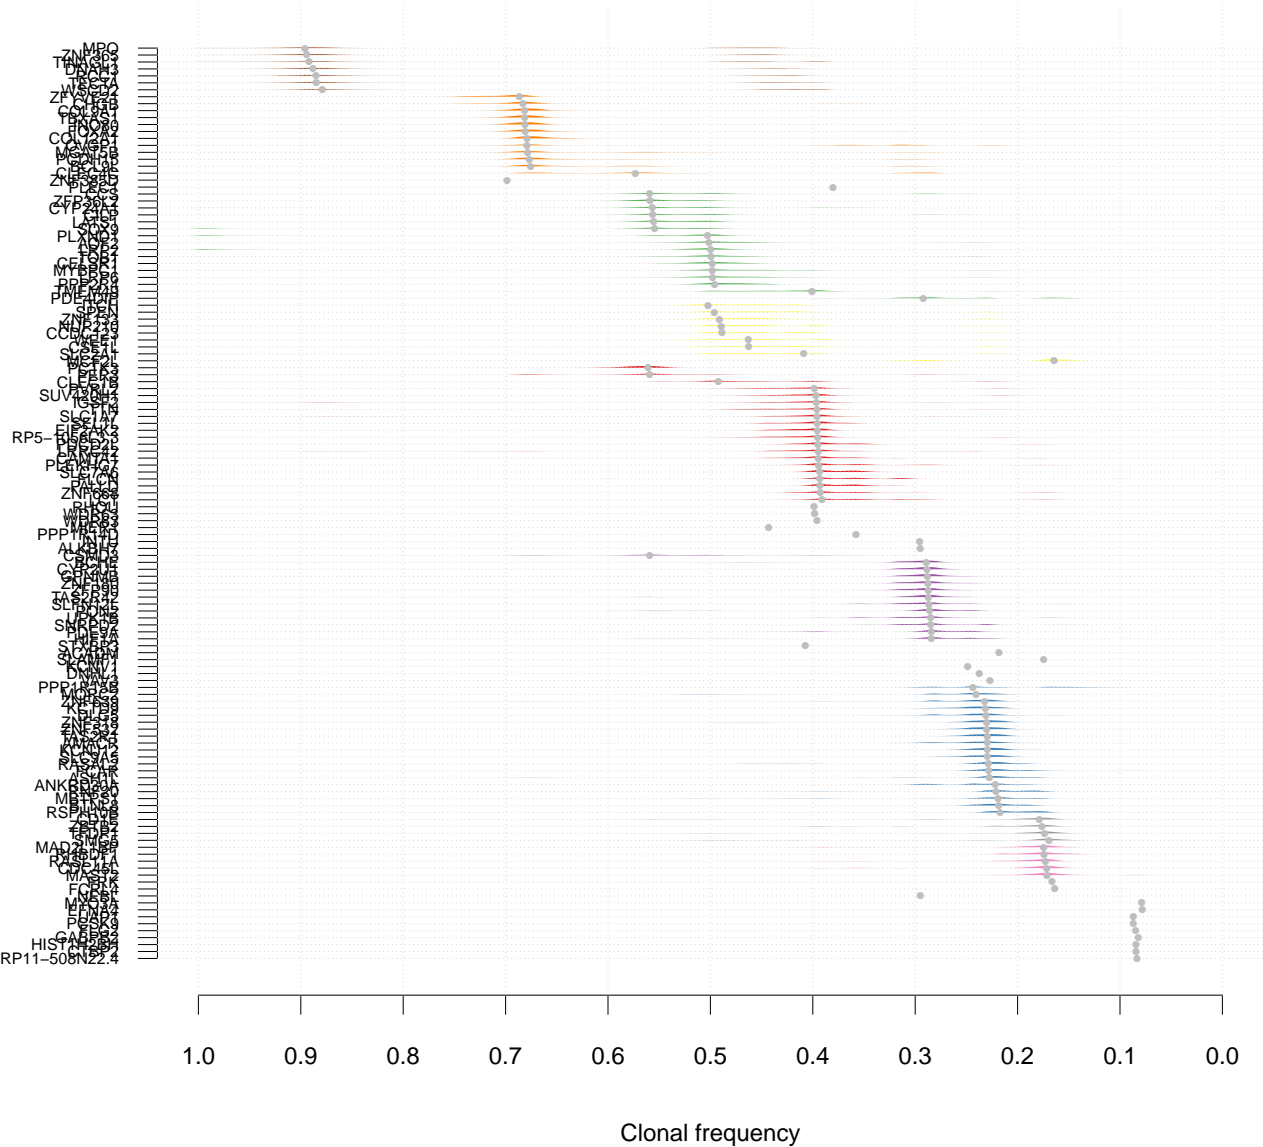



SA208 n= 27

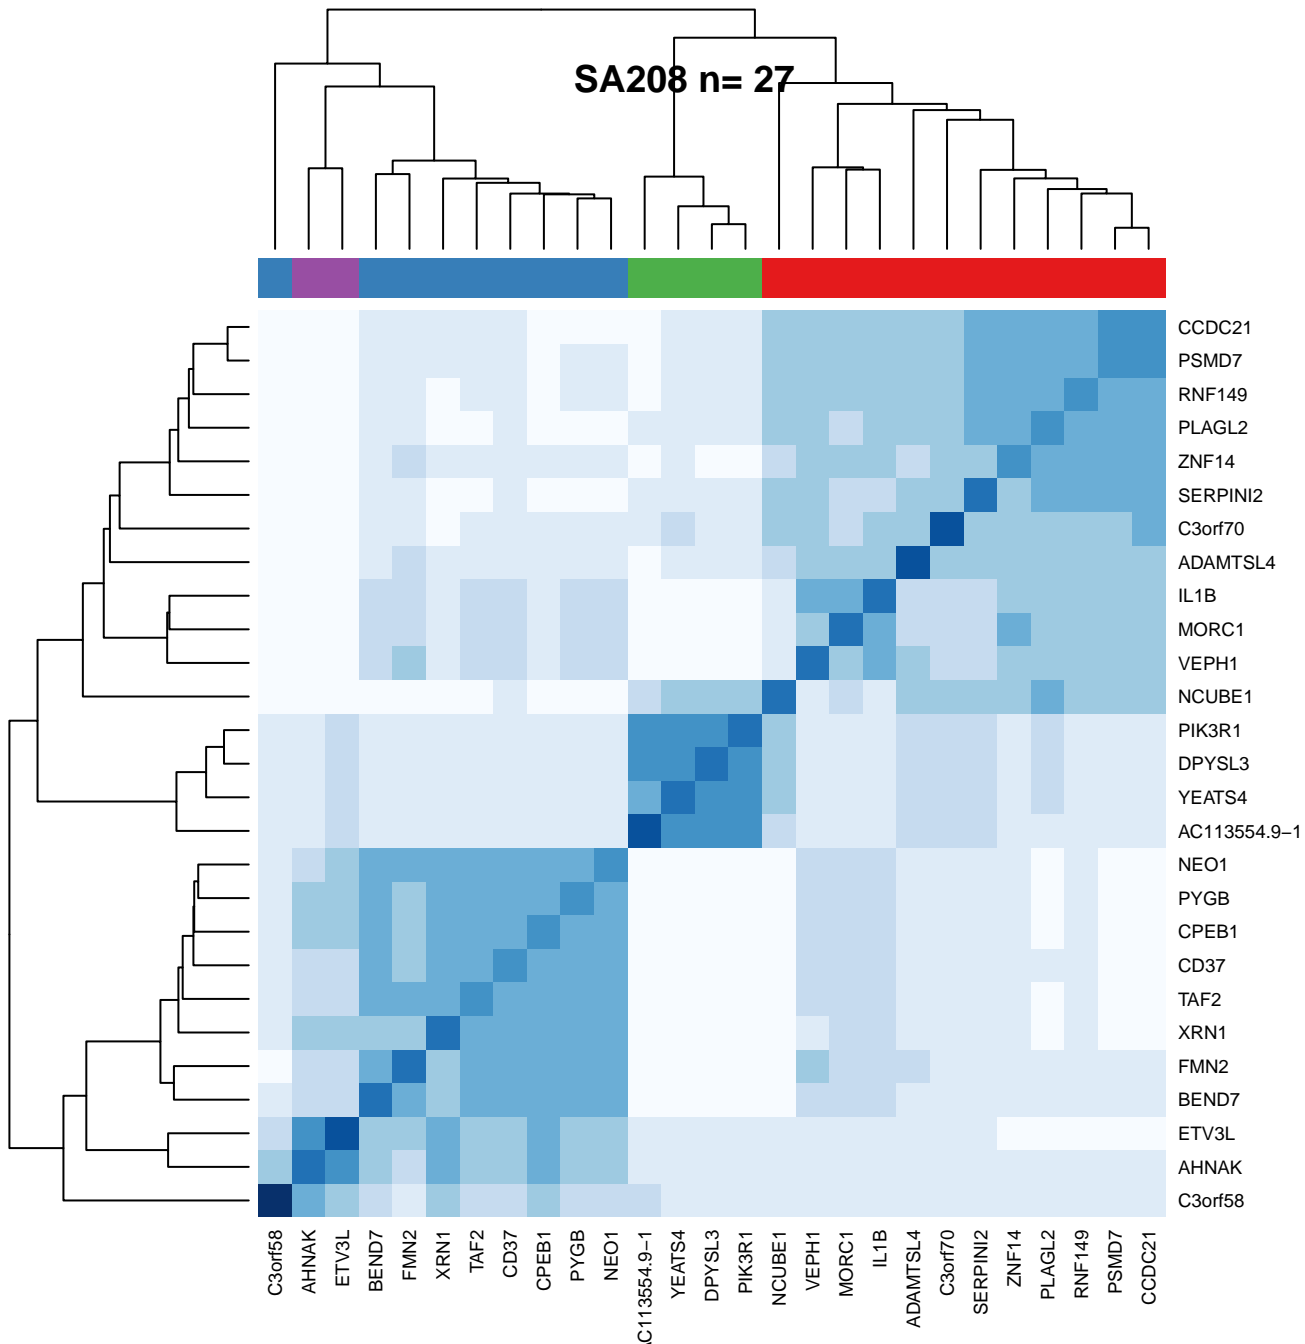

# SA208 n= 27

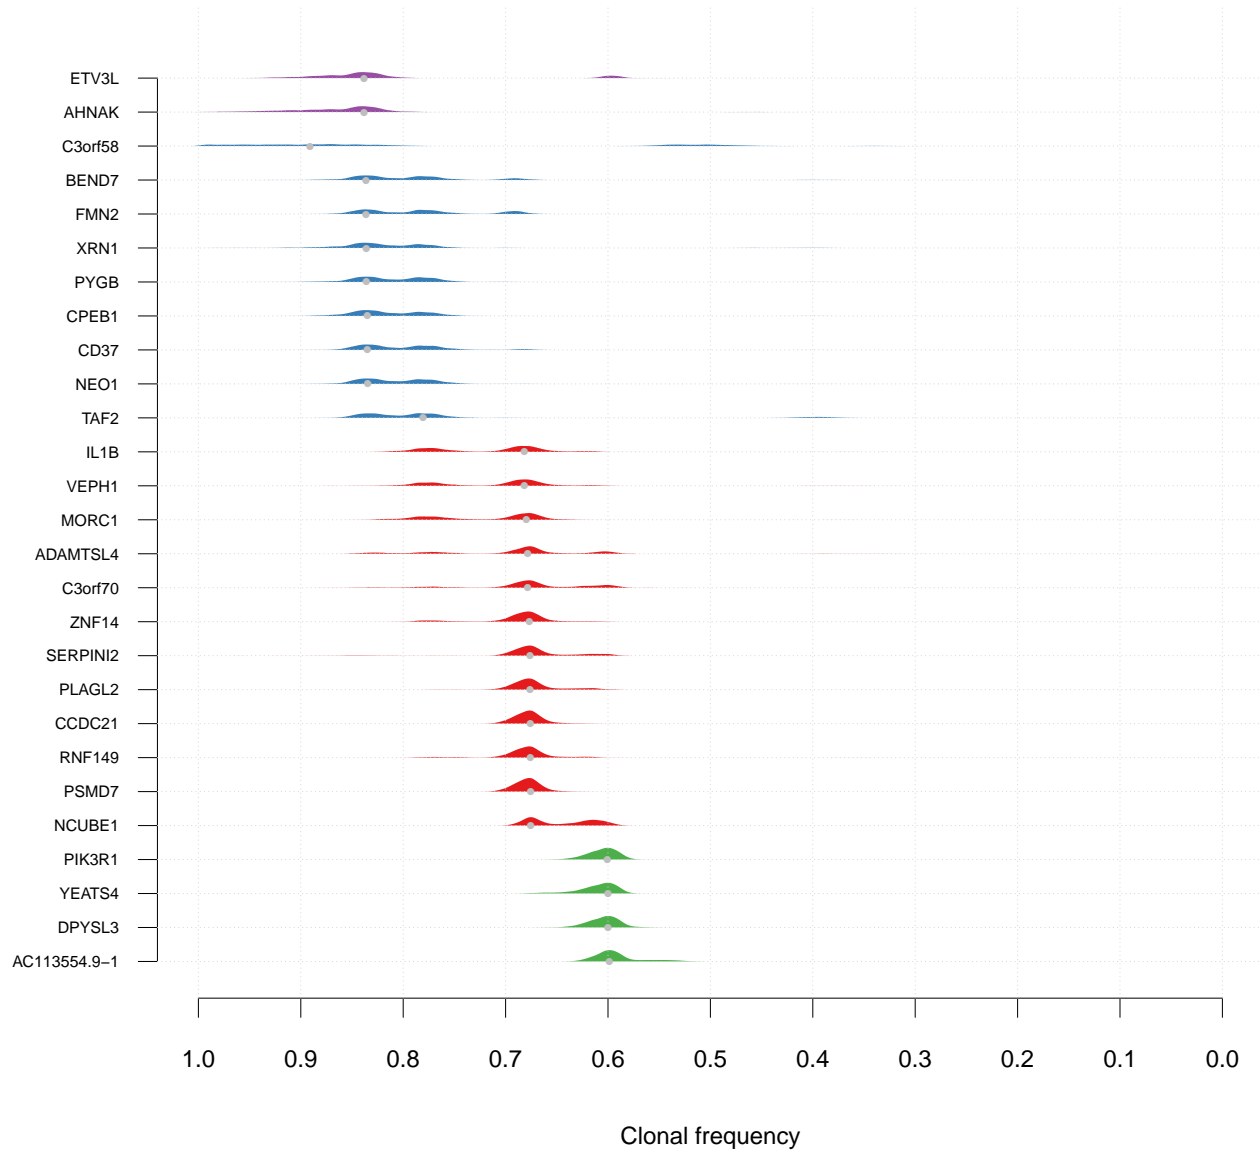

SA210 n= 56

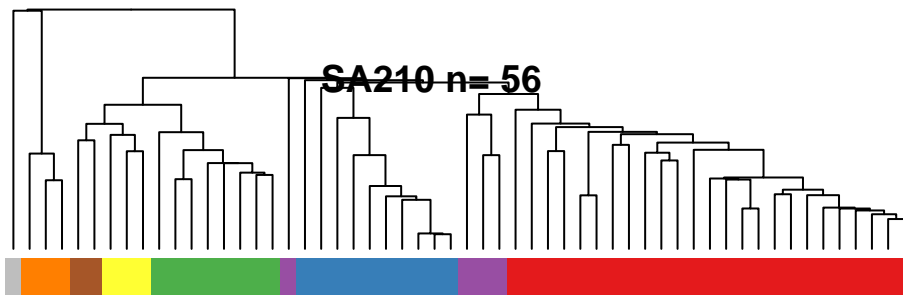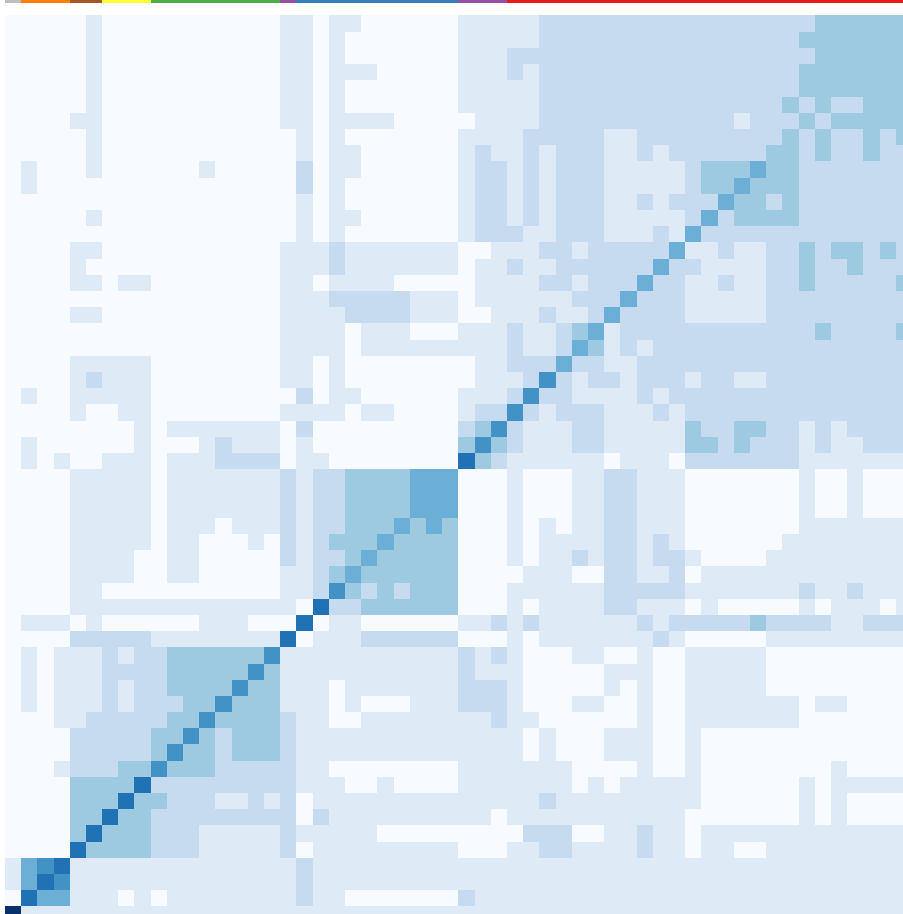

- CDH1
- HAT1
- SLC25A3
- ANKRD50
- ATR
- TSPAN16
- TRIP10
- MANSC1
- LIN7A
- KIAA1468
- CTDSPL2
- GRM1
- COL6A3
- PLAG1
- EIF4G2
- ZFP161
- AKAP9
- RASSF6
- NRN1L
- SF3B3
- POLR1B
- RP1
- CNTNAP3
- CHDH
- HLA-DRA
- SH3GL2
- RLBP1L2
- EIF3M
- LONP1
- IL1F9
- A26C1B
- VWF
- ADAMTS6
- YWHAH
- LRP1B
- THSD1
- C6orf170
- SORT1
- WWTR1
- MPZL1
- LAMB1
- WASF2
- TAF6
- TPCN2
- SATB1
- RABGAP1L
- NCDN
- USH2A
- AZIN1
- PPP2R5A
- TRAIP
- CPVL
- VLDLR
- NELL1
- JUN
- AQR

- AQR
- JUN
- NELL1
- VLDLR
- CPVL
- TRAIP
- PPP2R5A
- AZIN1
- USH2A
- NCDN
- RABGAP1L
- SATB1
- TPCN2
- TAF6
- WASF2
- LAMB1
- MPZL1
- WWTR1
- C6orf170
- THSD1
- LRP1B
- YWHAH
- ADAMTS6
- VWF
- A26C1B
- IL1F9
- LONP1
- EIF3M
- RLBP1L2
- SH3GL2
- HLA-DRA
- CHDH
- CNTNAP3
- RP1
- POLR1B
- SF3B3
- NRN1L
- RASSF6
- AKAP9
- ZFP161
- EIF4G2
- PLAG1
- COL6A3
- GRM1
- CTDSPL2
- KIAA1468
- LIN7A
- MANSC1
- TRIP10
- TSPAN16
- ATR
- ANKRD50
- SLC25A3
- HAT1
- CDH1

# SA210 n= 56

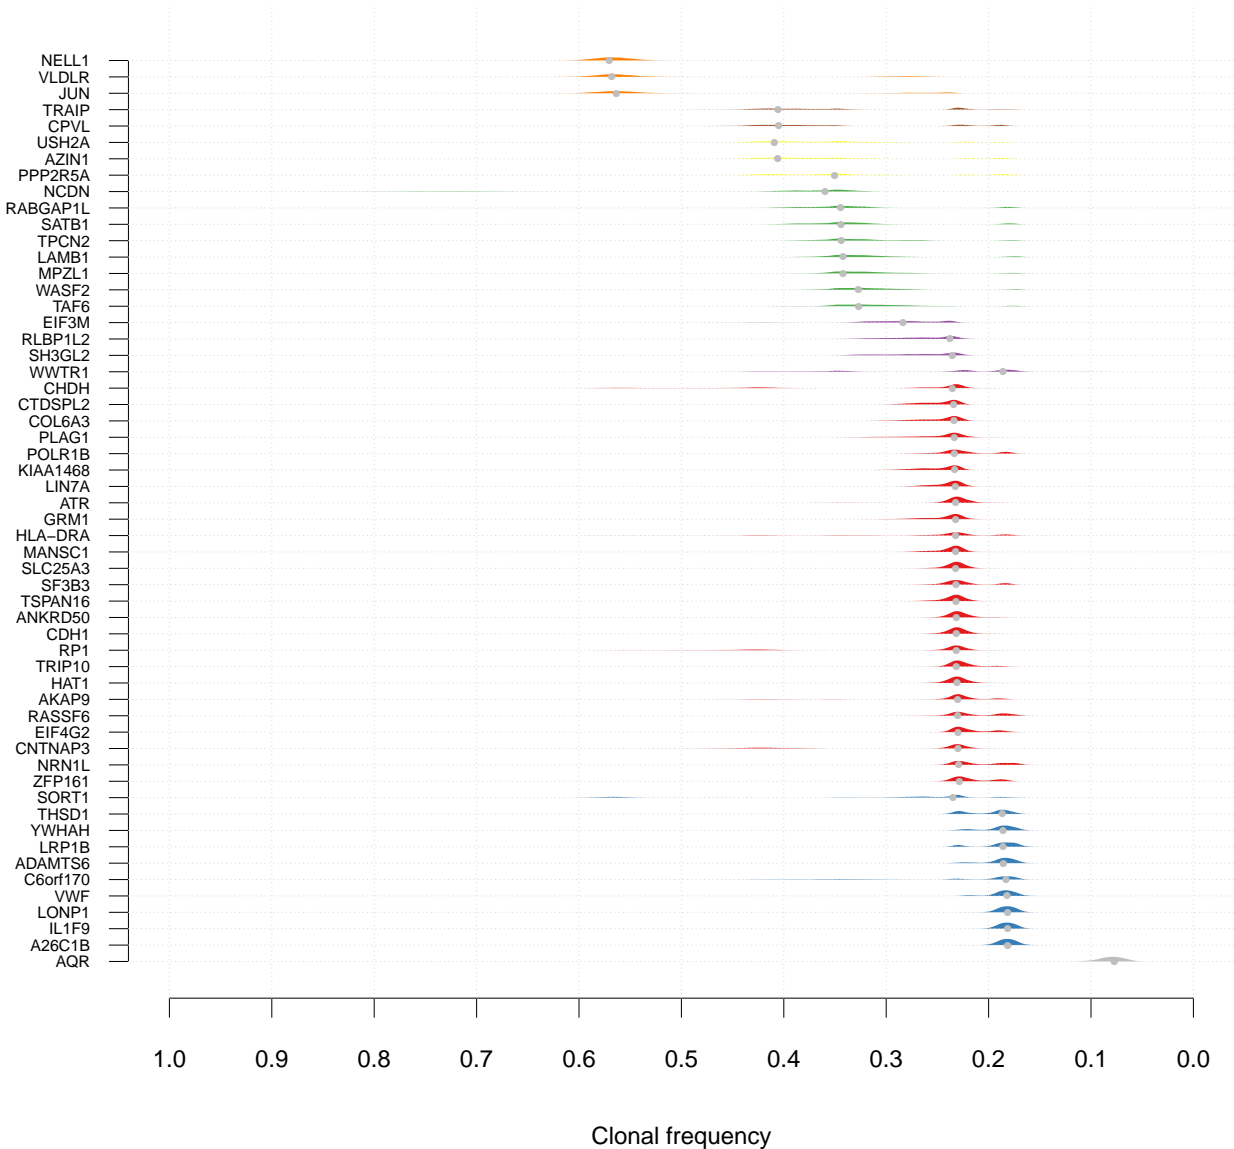

SA212 n= 48

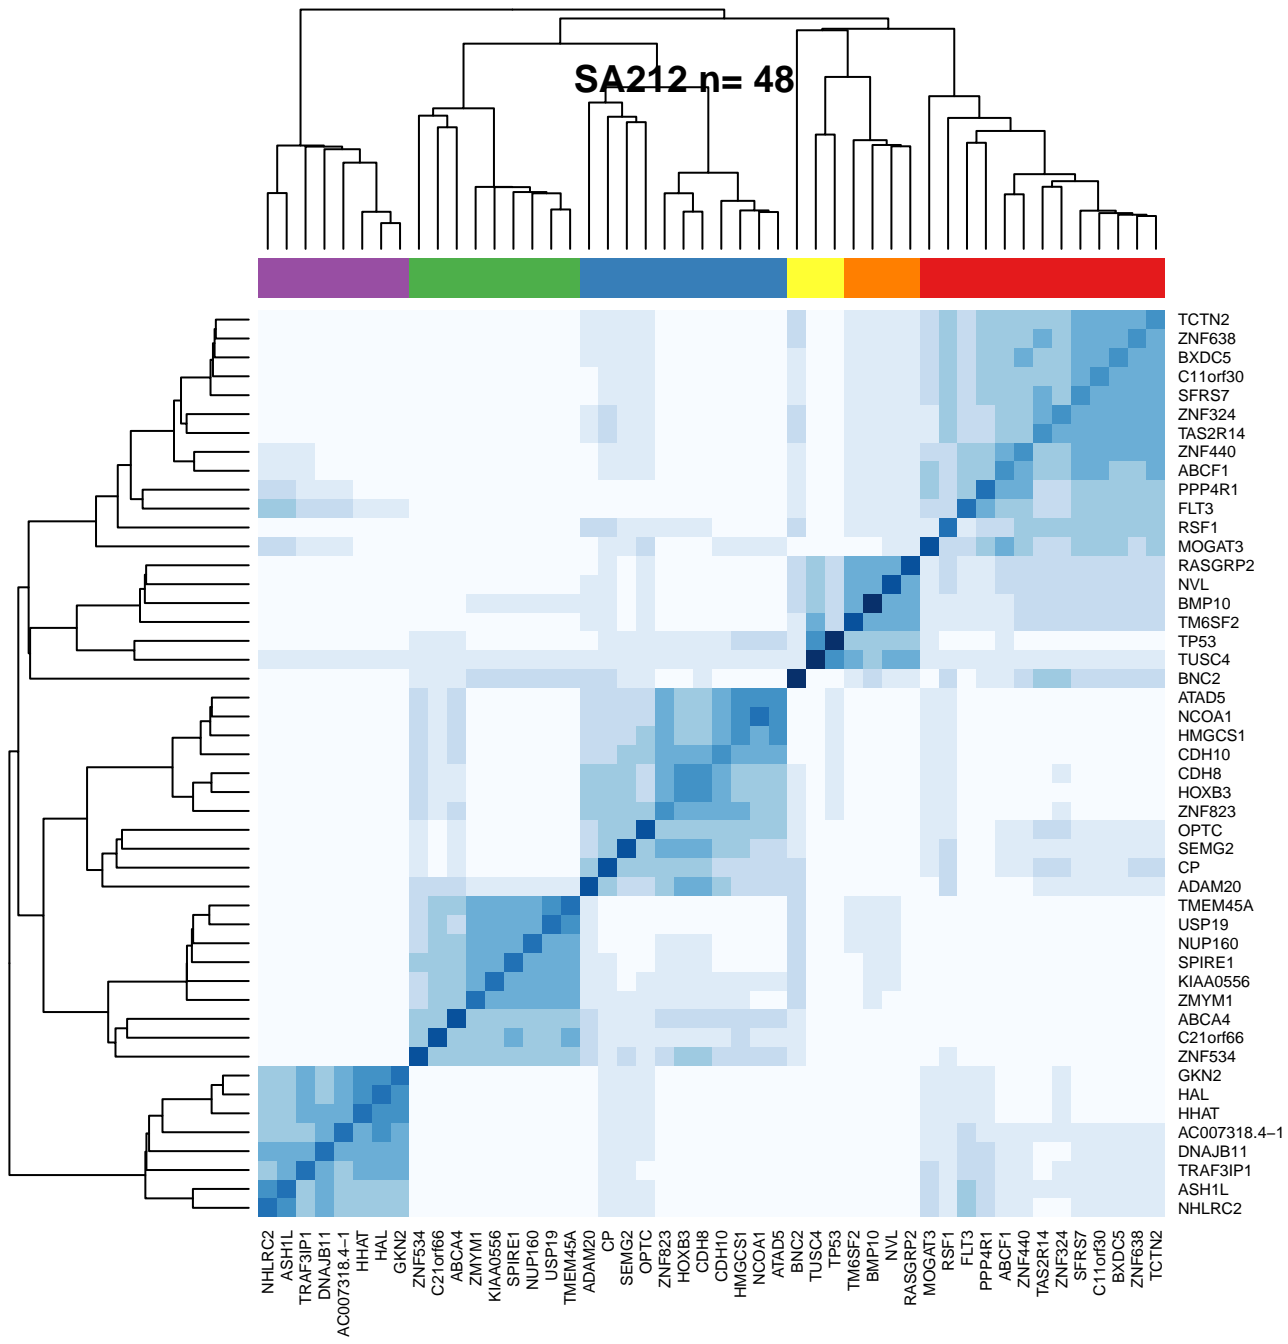

# SA212 n= 48

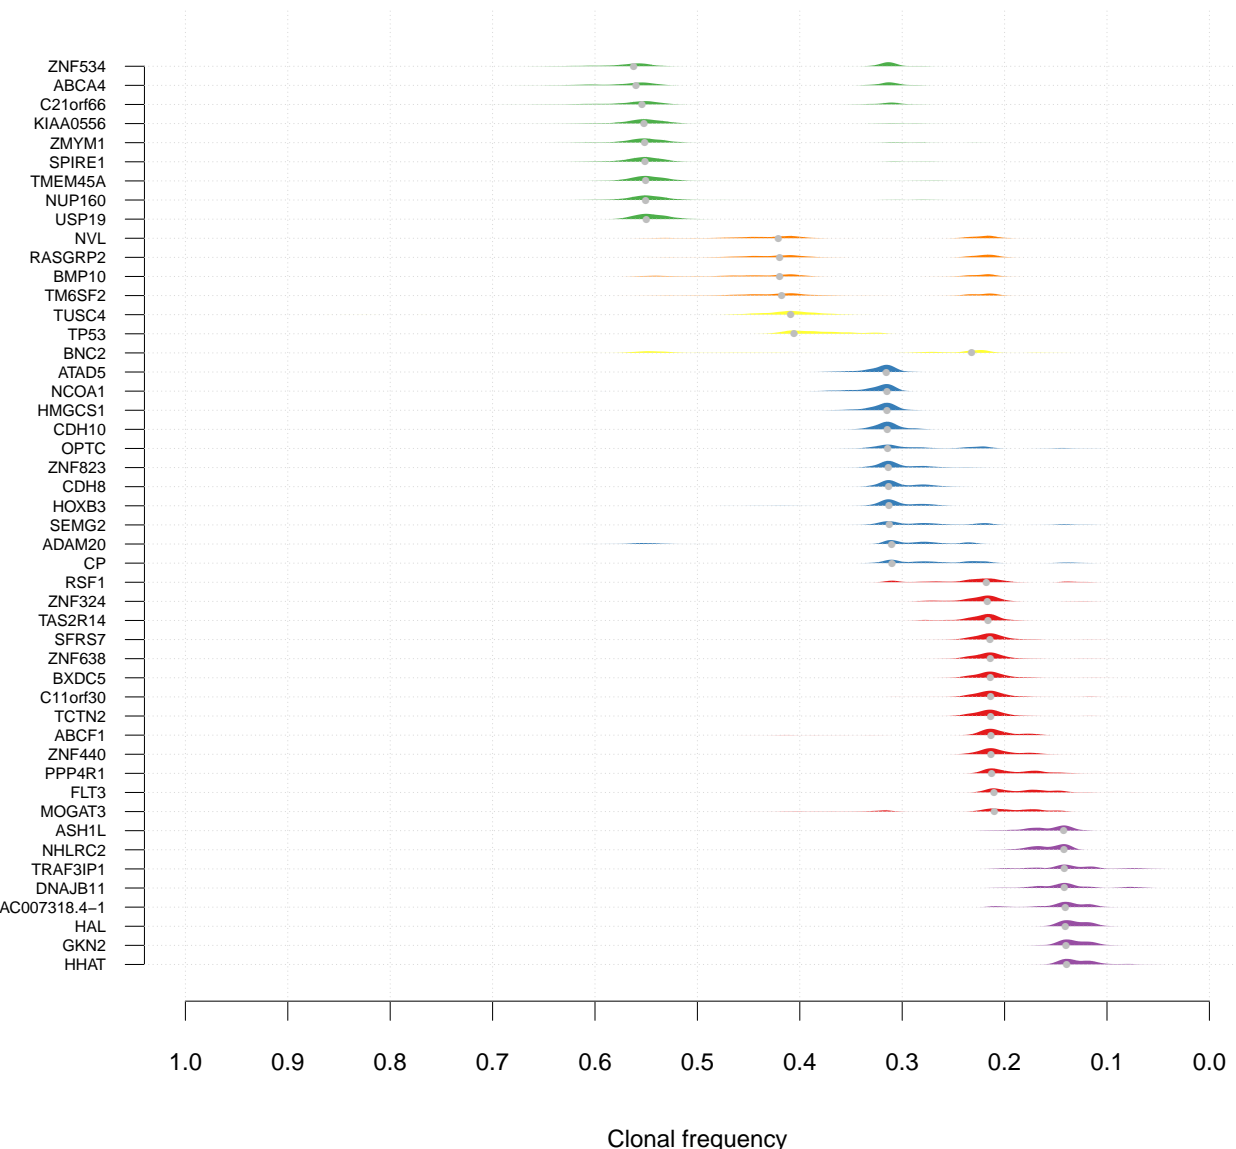

SA213 n= 44

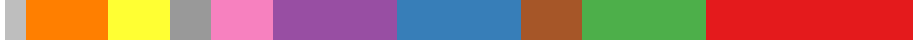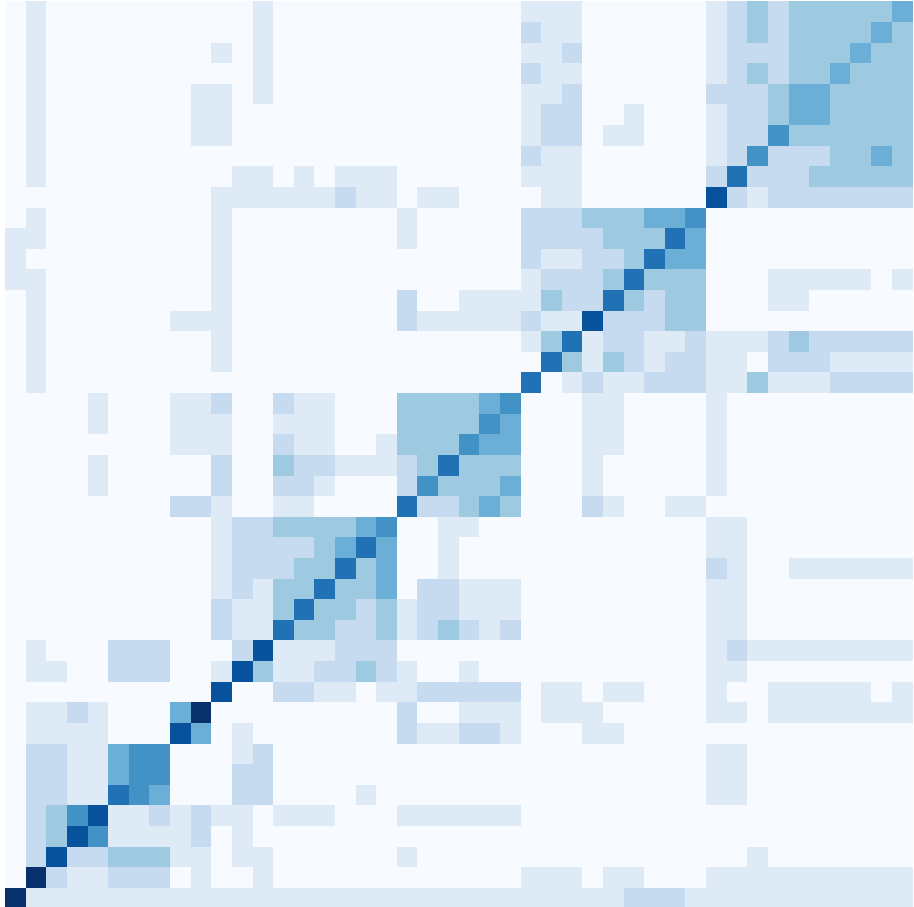

SLC22A25  
CCNC  
TM7SF4  
KRT36  
VEPH1  
MED22  
TP53  
AC136632.3-3  
EGFR  
STXBP5L  
TPP2  
AMPH  
CPNE7  
DST  
SLC41A3  
ZNF311  
WDR88  
MKL2  
ZNF521  
C16orf76  
FAM62C  
NCR2  
C5orf34  
WDR21B  
TERT  
PIWIL3  
PDE5A  
TCTN3  
PDE4DIP  
PARP4  
C6orf186  
P2RY12  
TLR5  
MMP8  
KIAA2018  
MYO5B  
PLCB3  
LCPI  
HIVEP3  
KCNT1  
SDCBP  
MAGEF1  
KRT31  
DGCR14

DGCR14  
KRT31  
MAGEF1  
SDCBP  
KCNT1  
HIVEP3  
LCP1  
PLCB3  
MYO5B  
KIAA2018  
MMP8  
TLR5  
P2RY12  
C6orf186  
PARP4  
PDE4DIP  
TCTN3  
PDE5A  
PIWIL3  
TERT  
WDR21B  
C5orf34  
NCR2  
FAM62C  
C16orf76  
ZNF521  
MKL2  
WDR88  
ZNF311  
SLC41A3  
DST  
CPNE7  
AMPH  
TPP2  
STXBP5L  
EGFR  
AC136632.3-3  
TP53  
MED22  
VEPH1  
KRT36  
TM7SF4  
CCNC  
SLC22A25

# SA213 n= 44

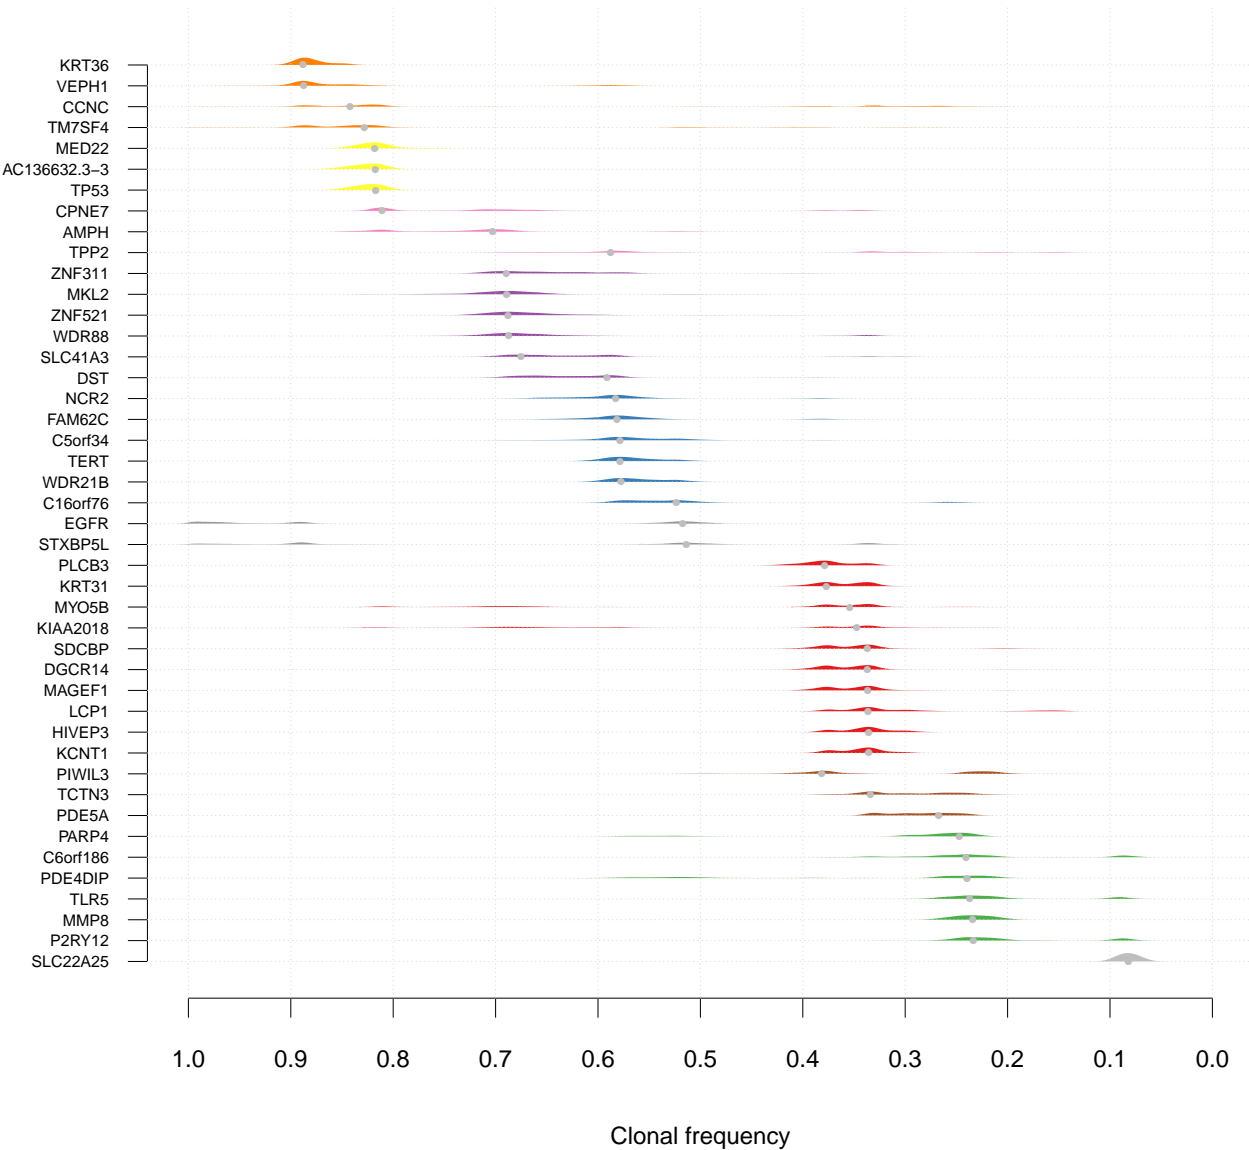





# SA214 n= 195

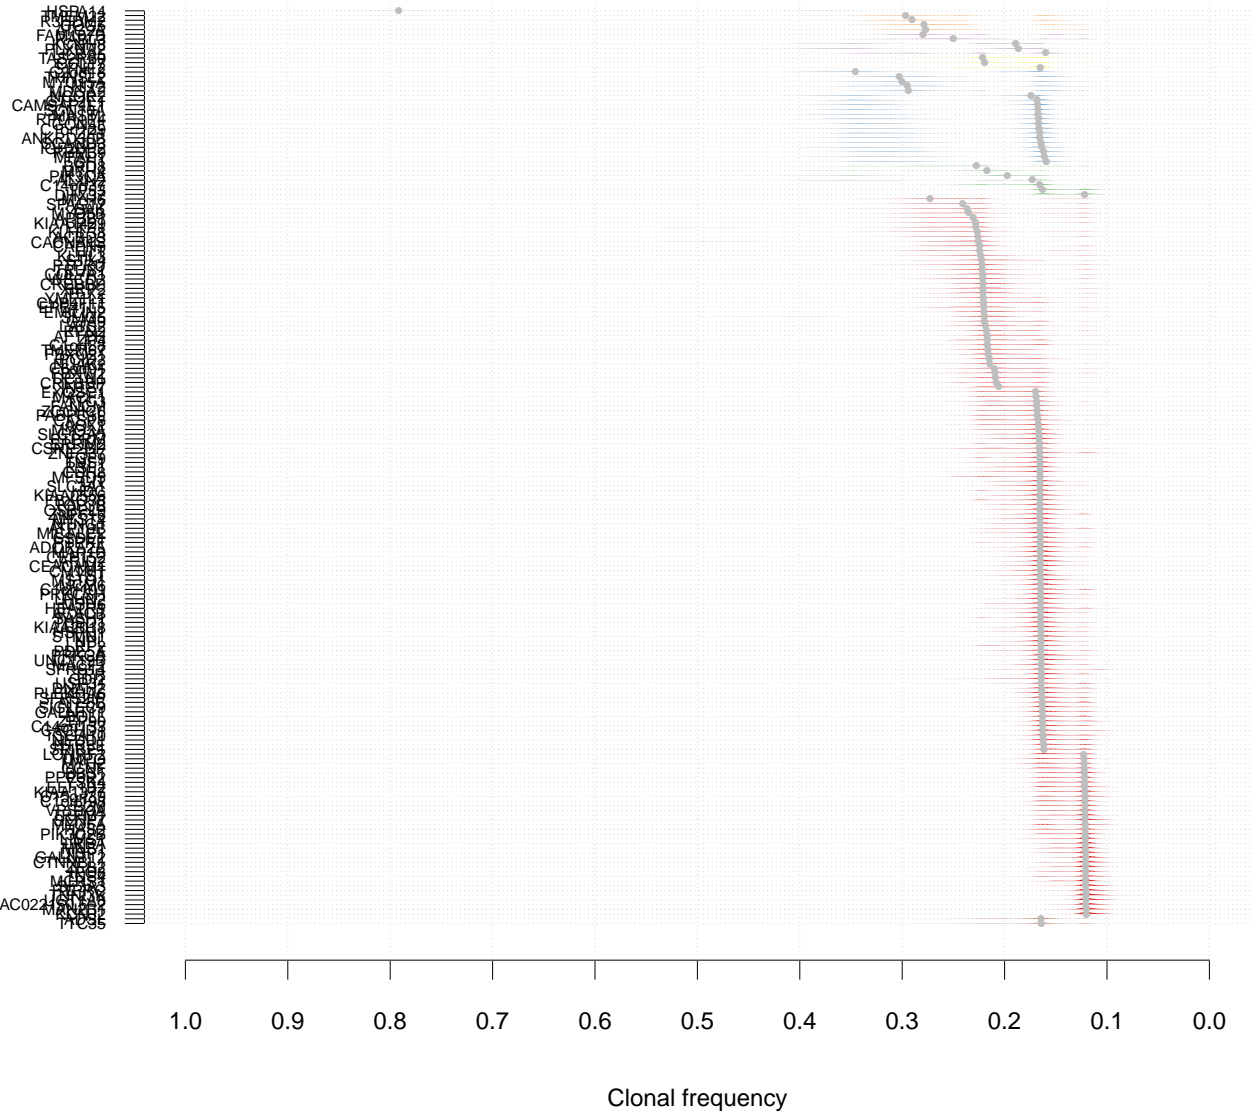



# SA215 n= 12

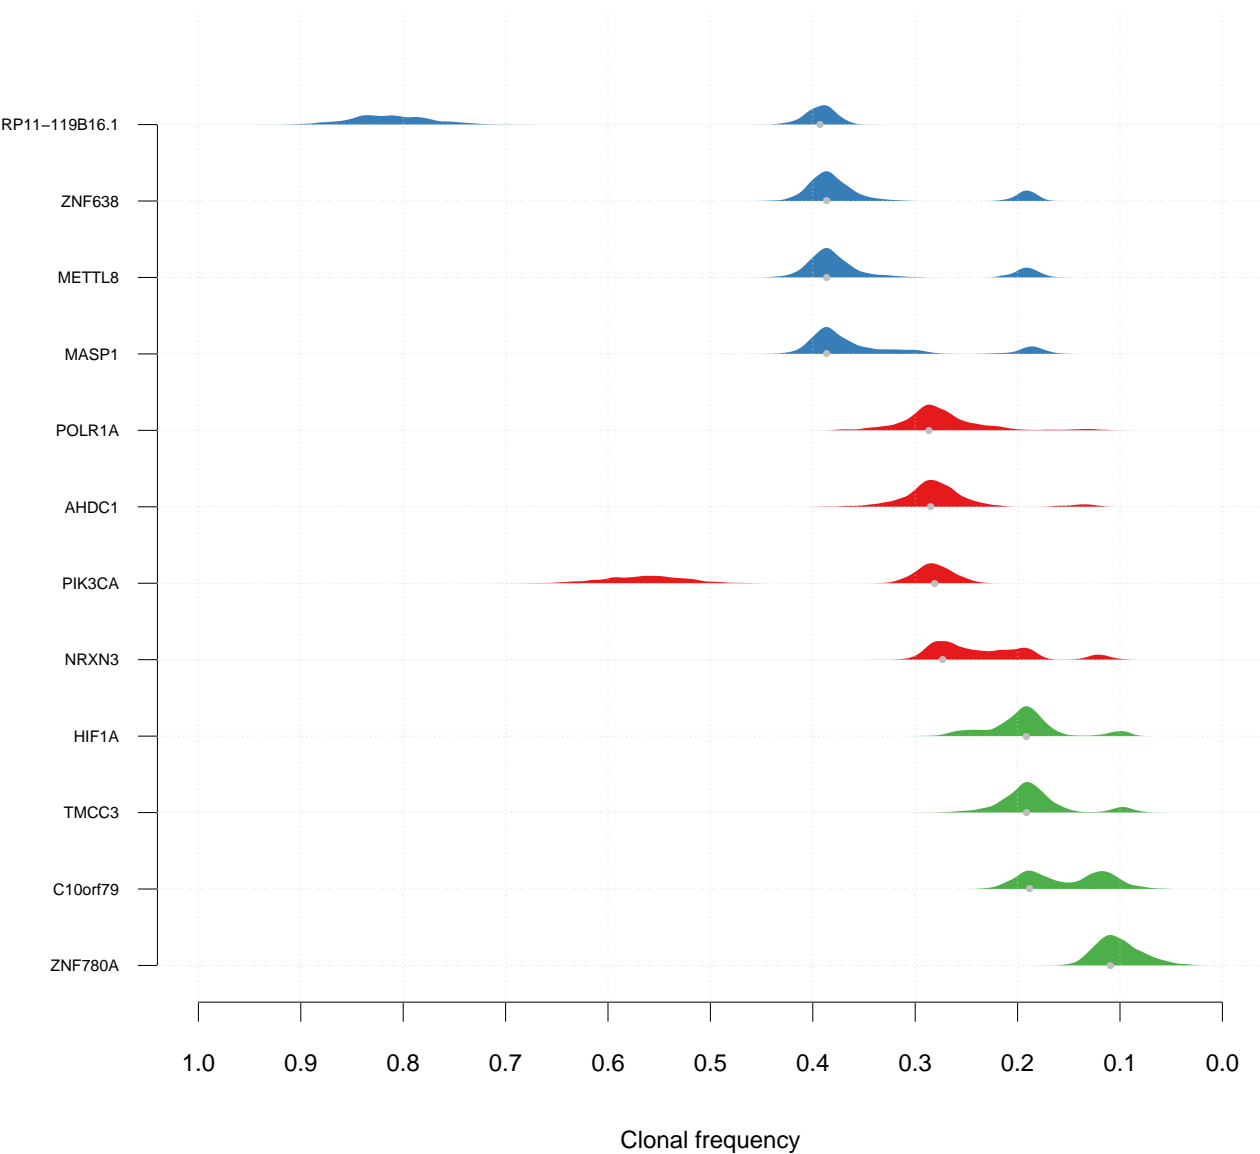



# SA216 n= 16

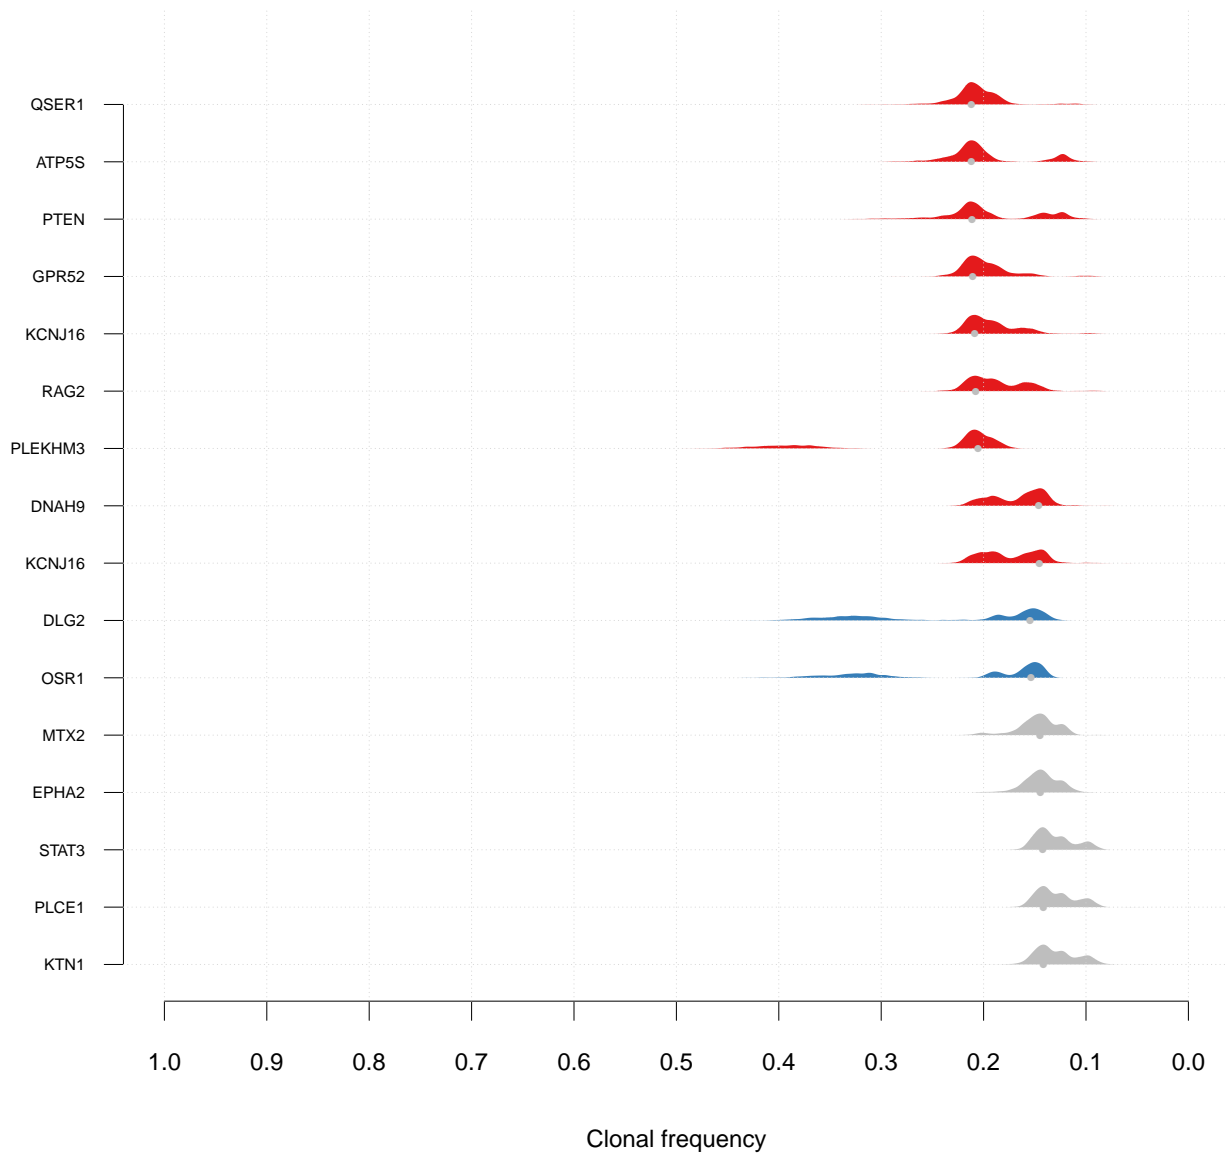



# SA217 n= 14

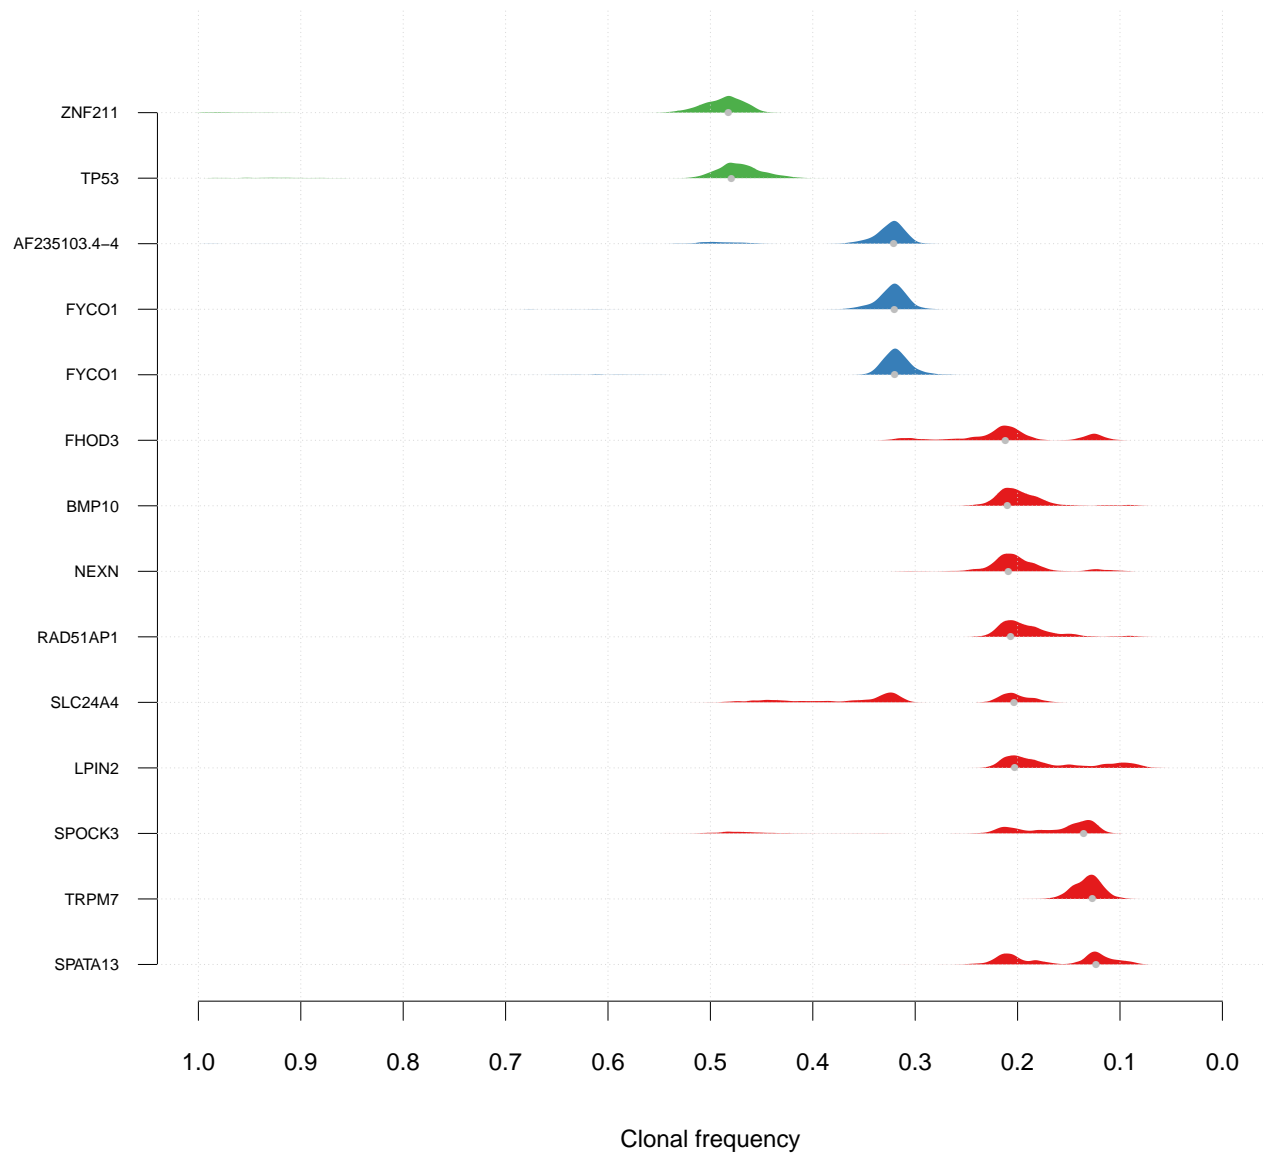







SA219 n= 36

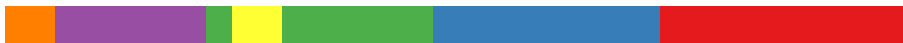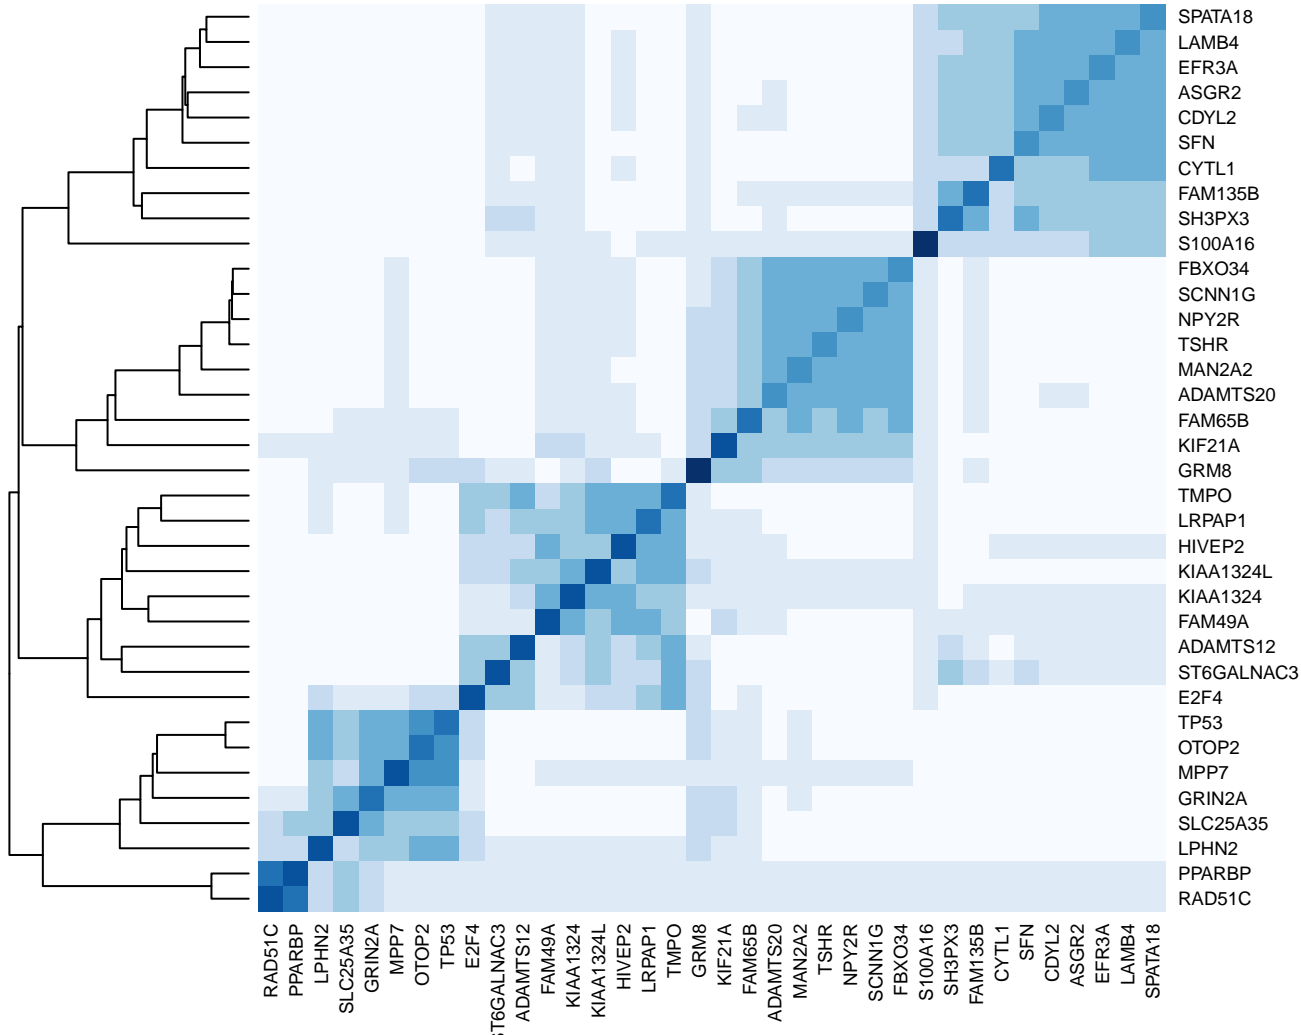

# SA219 n= 36

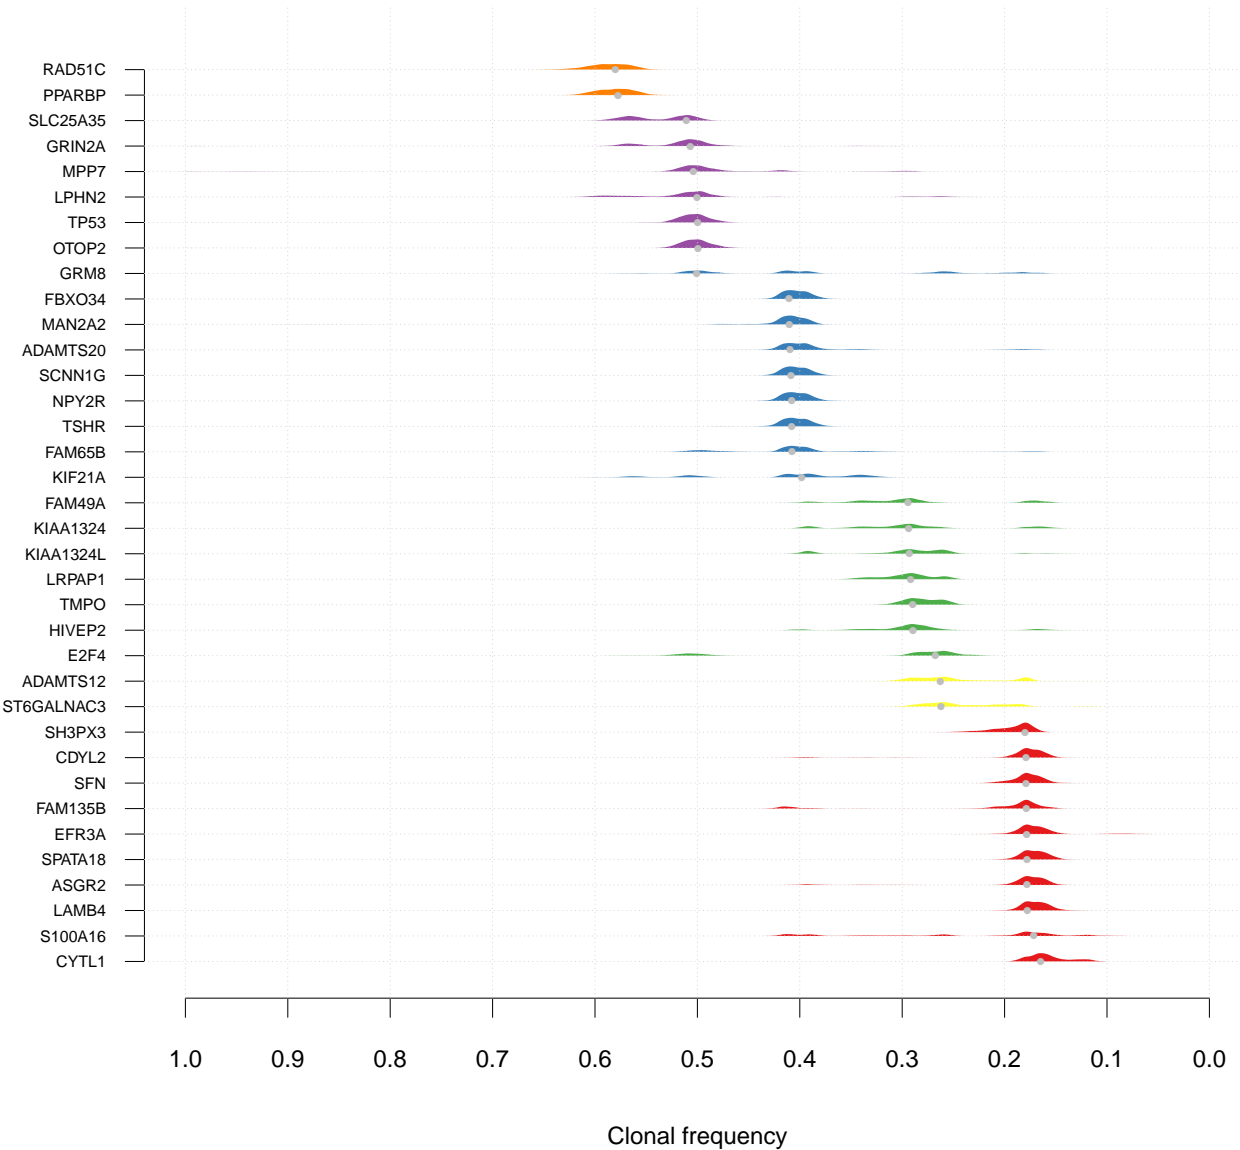



# SA222 n= 15

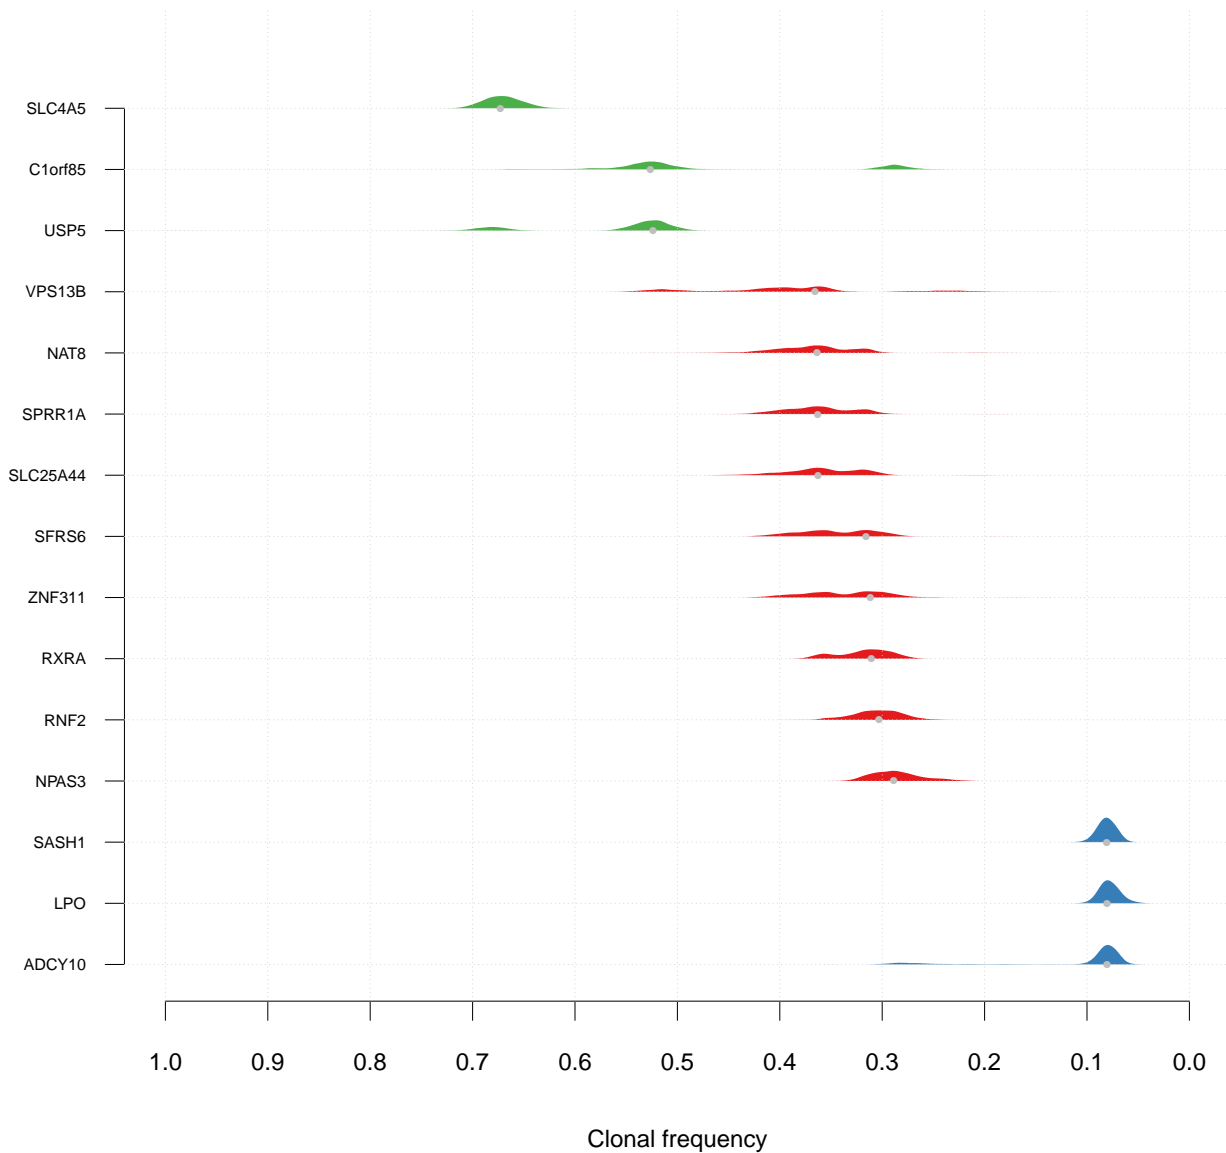



# SA223 n= 16

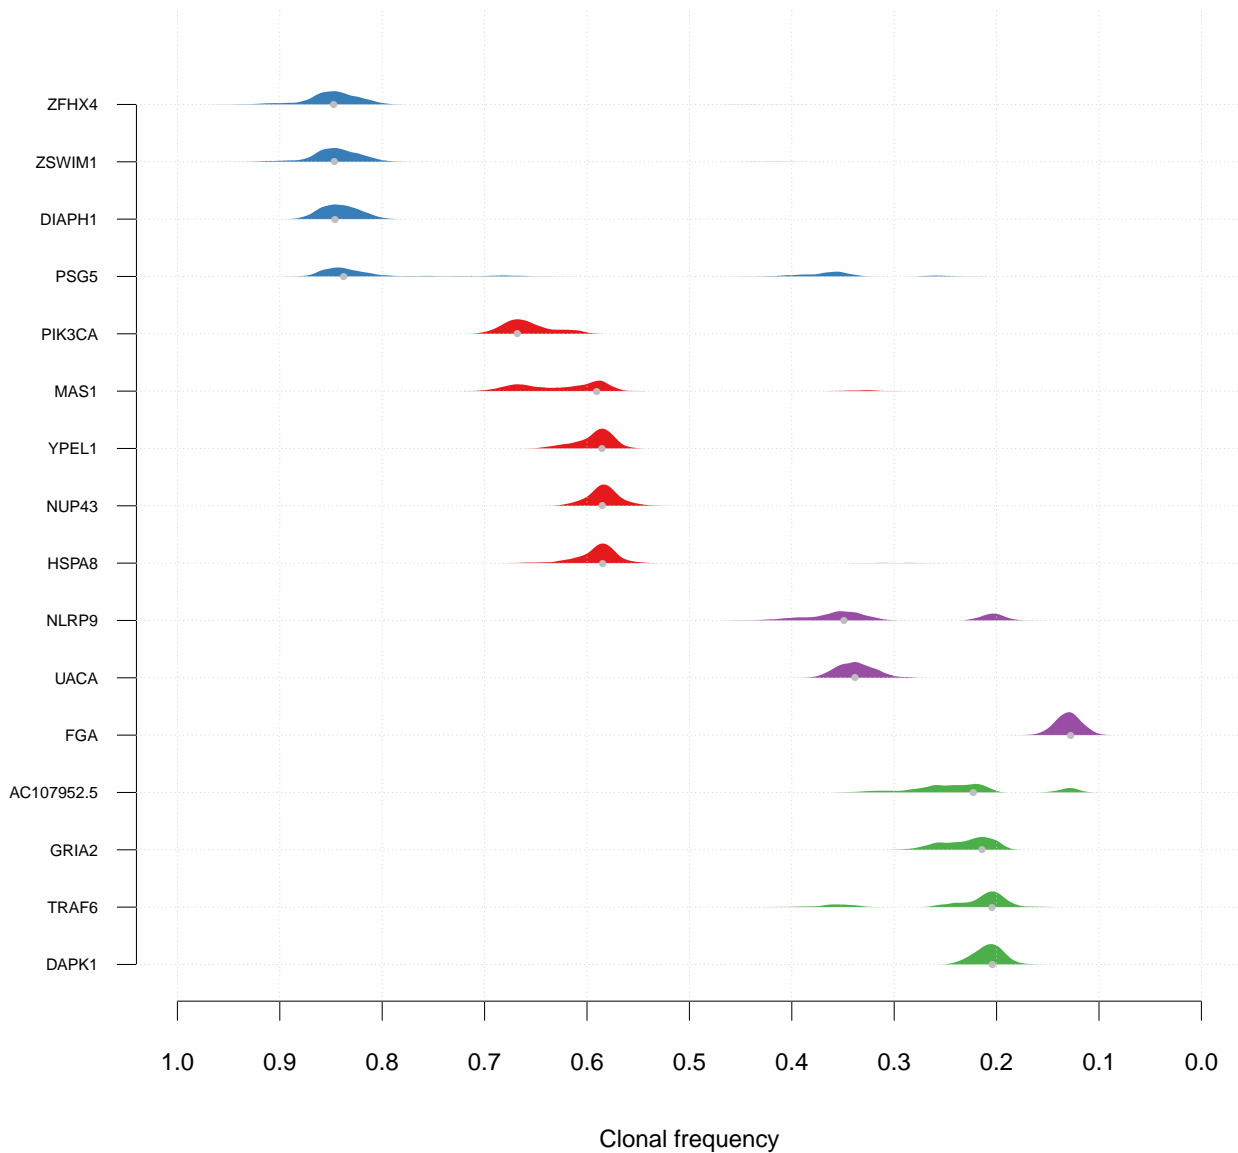



SA225 n= 60

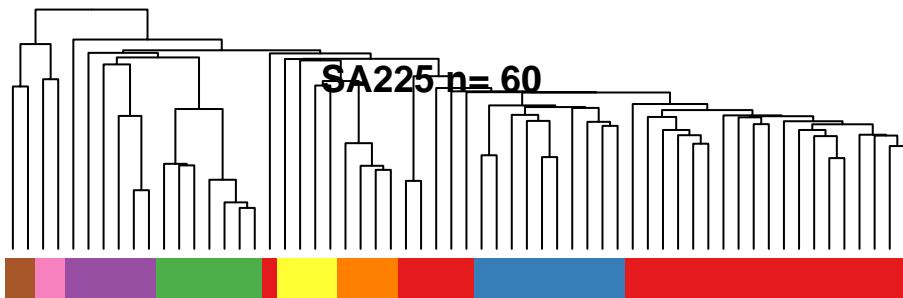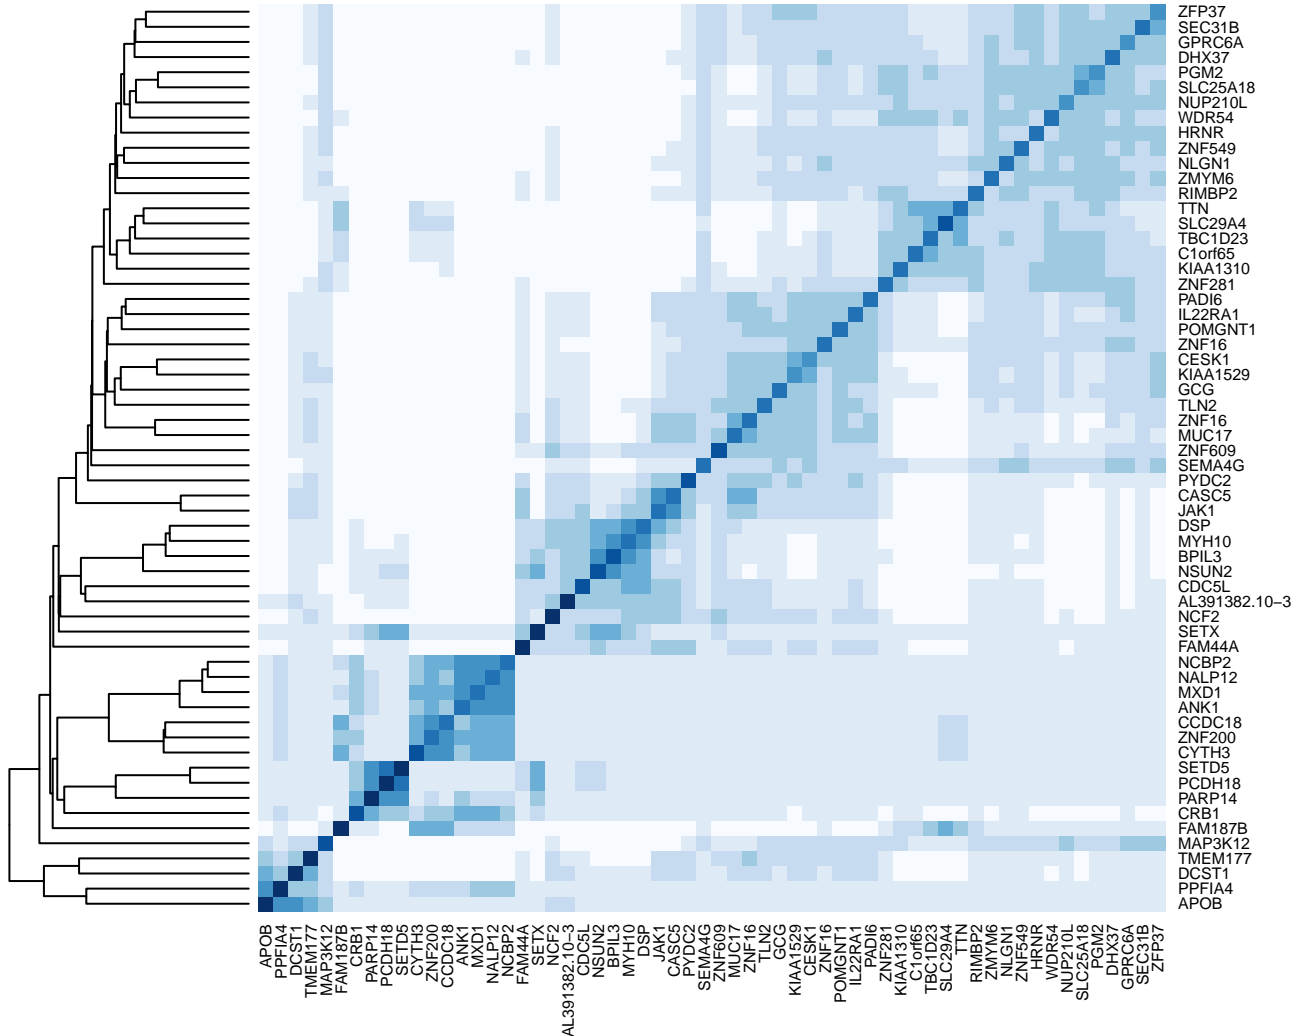

# SA225 n= 60

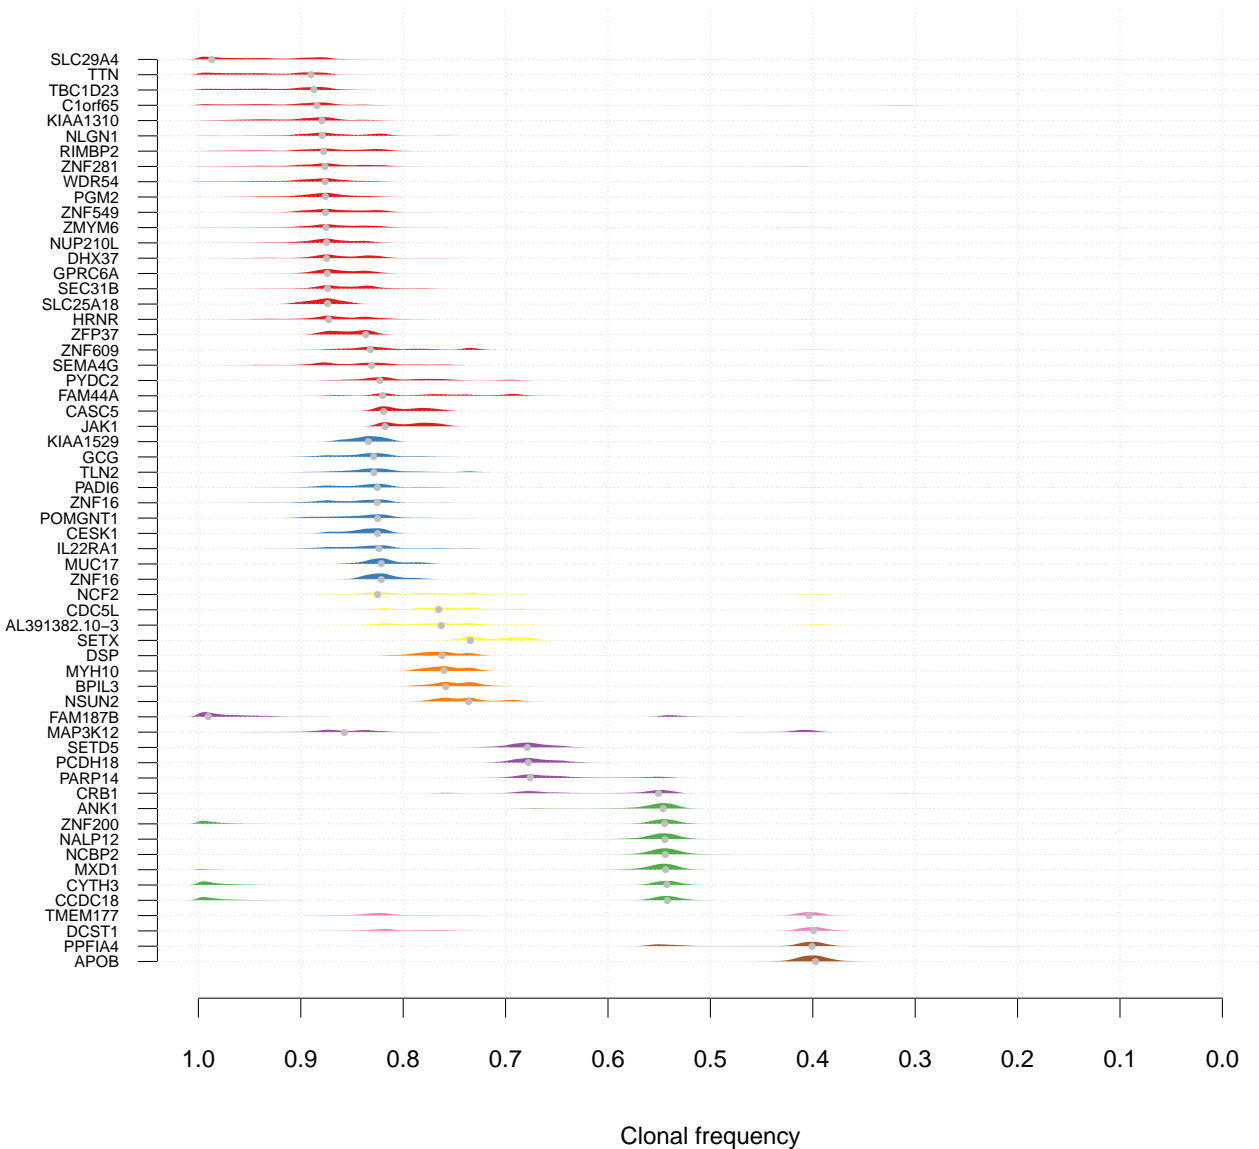

SA226 n= 20

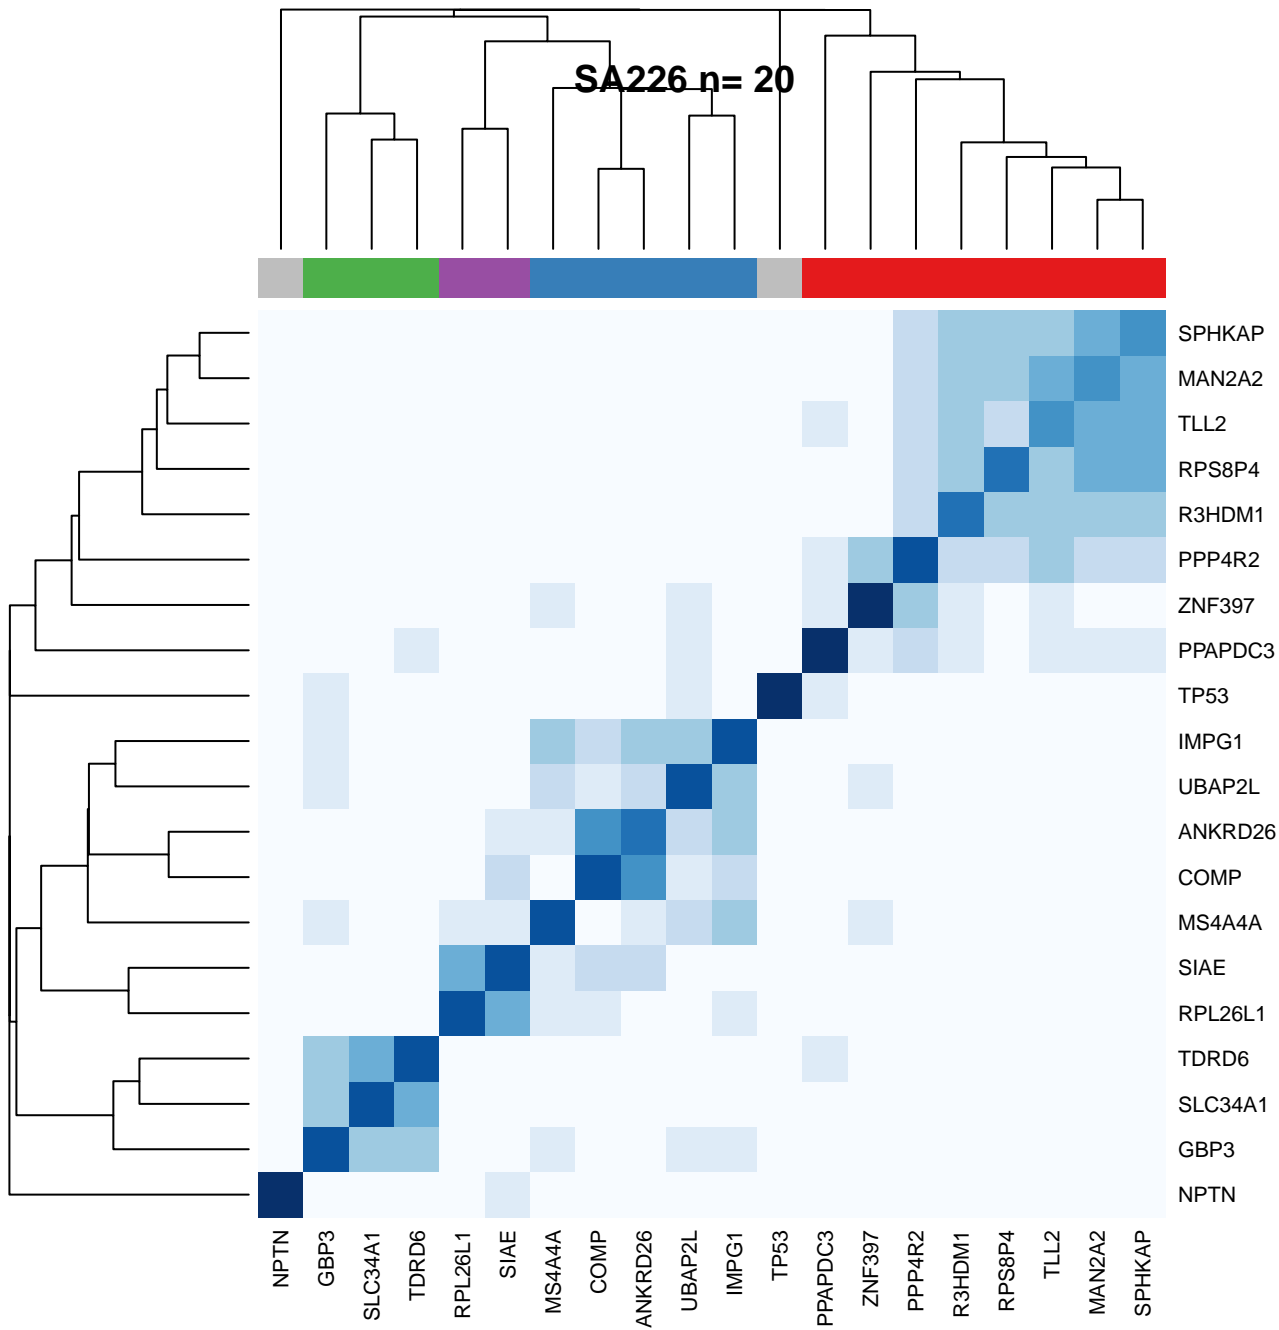

# SA226 n= 20

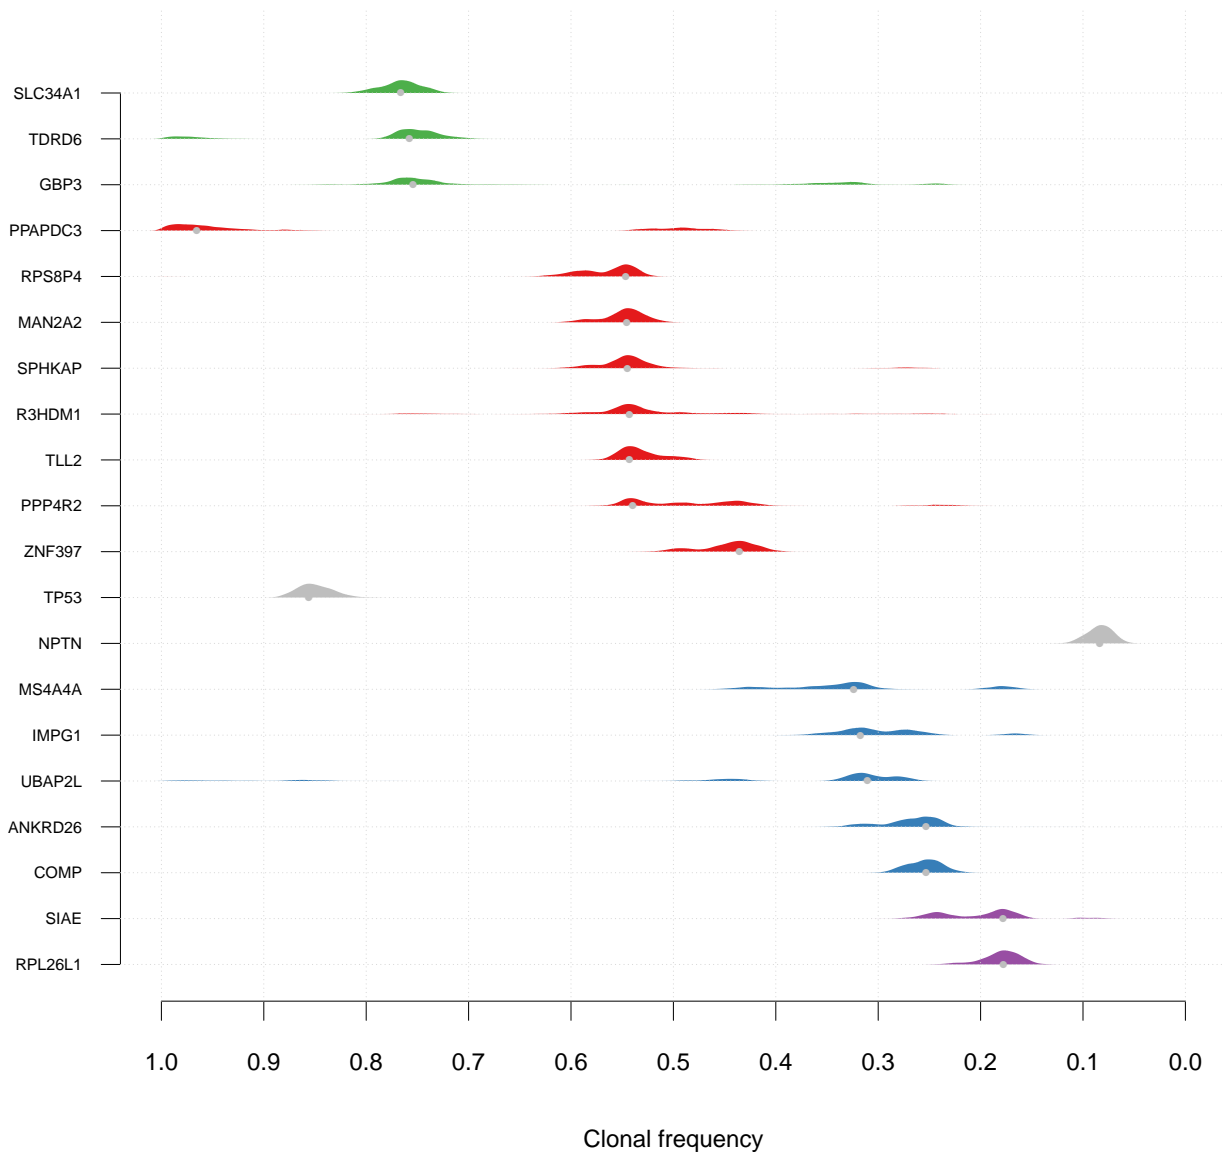



# SA227 n= 16

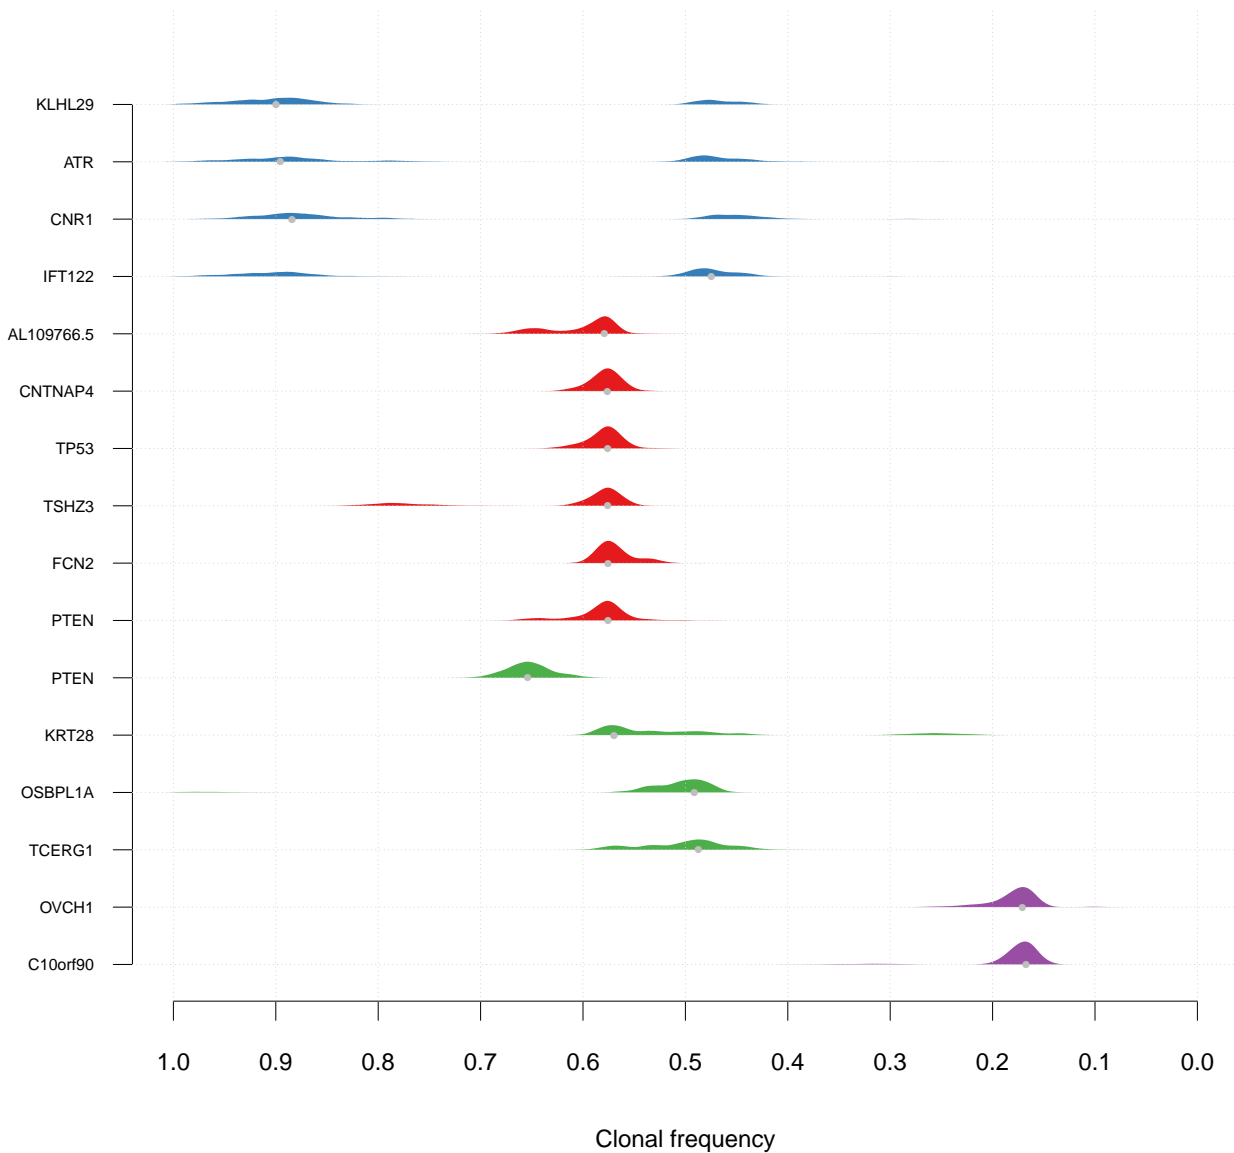



# SA228 n= 16

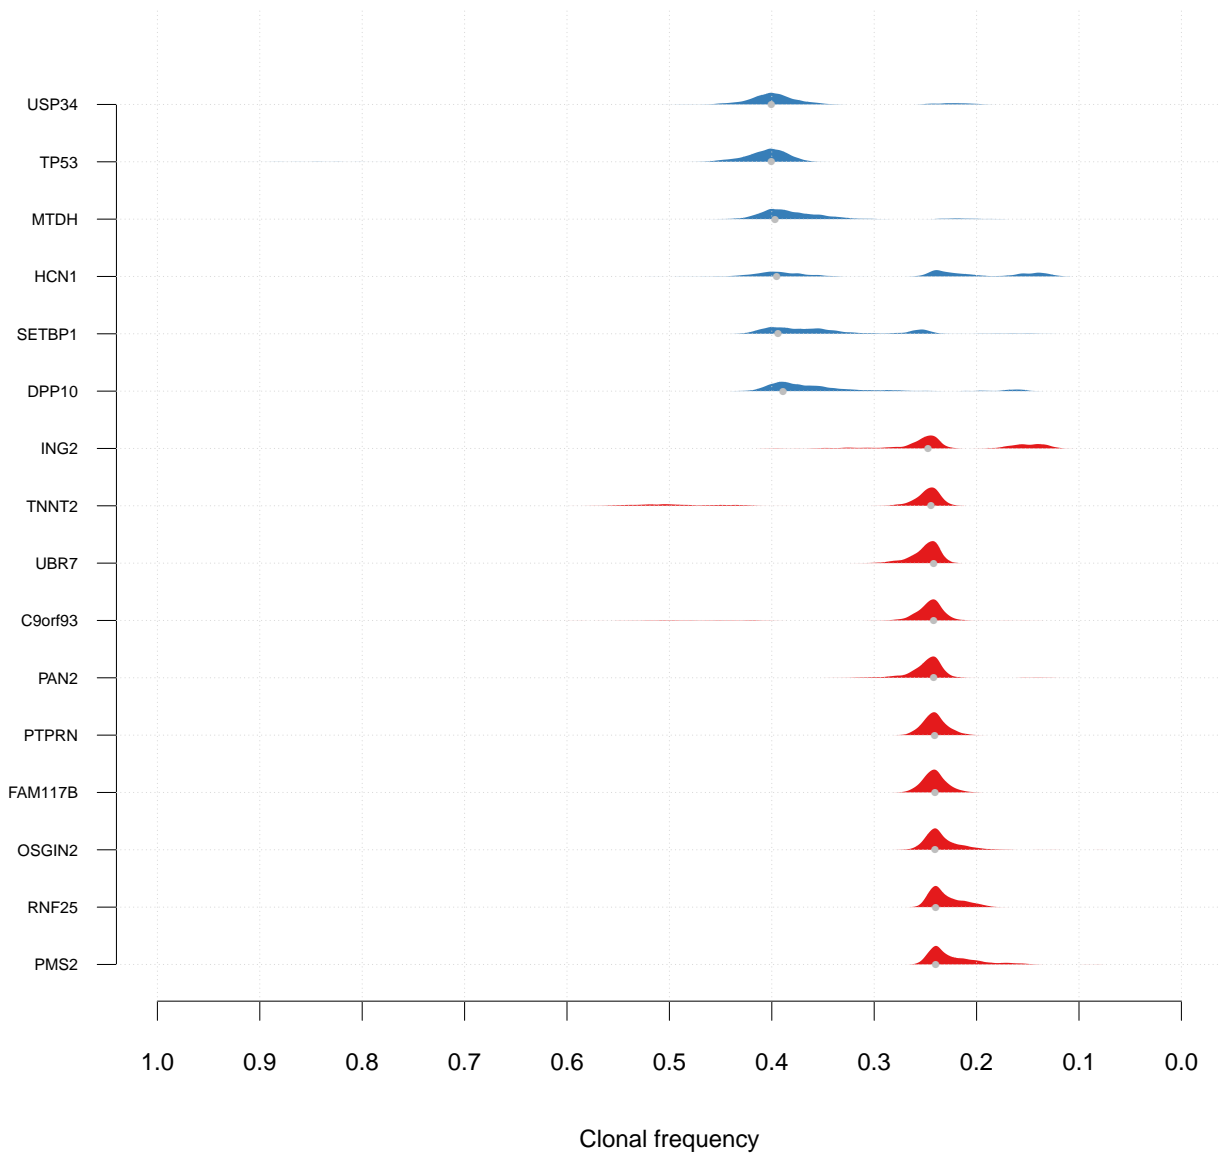



SA229 n= 33

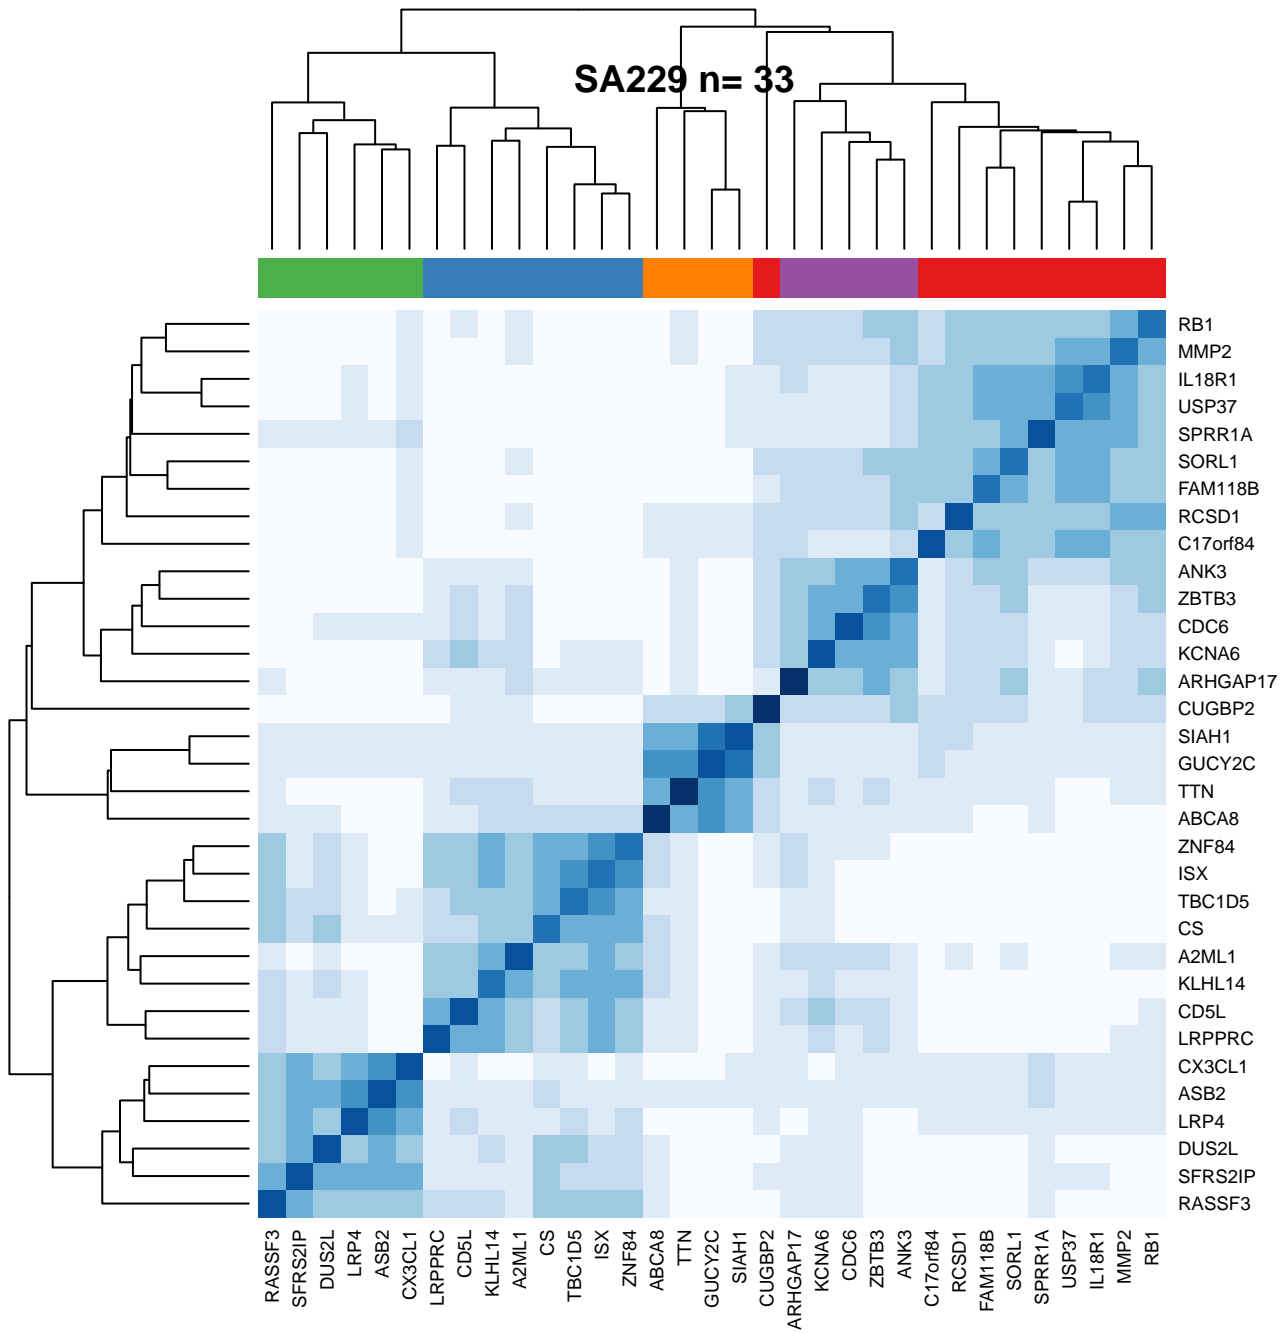

# SA229 n= 33

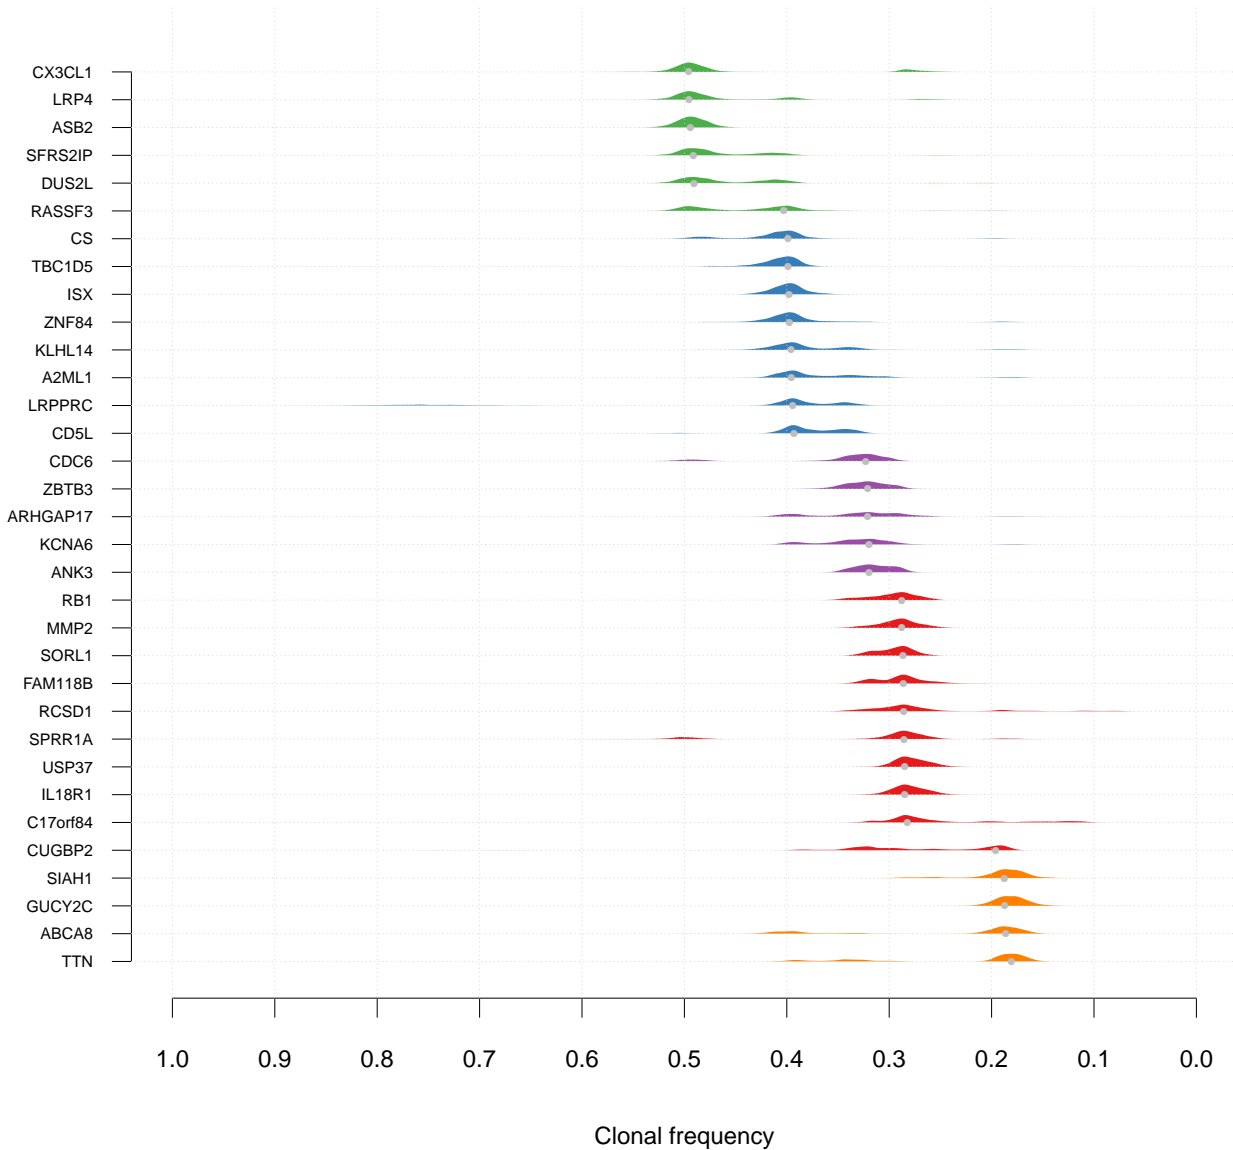

SA230 n= 10

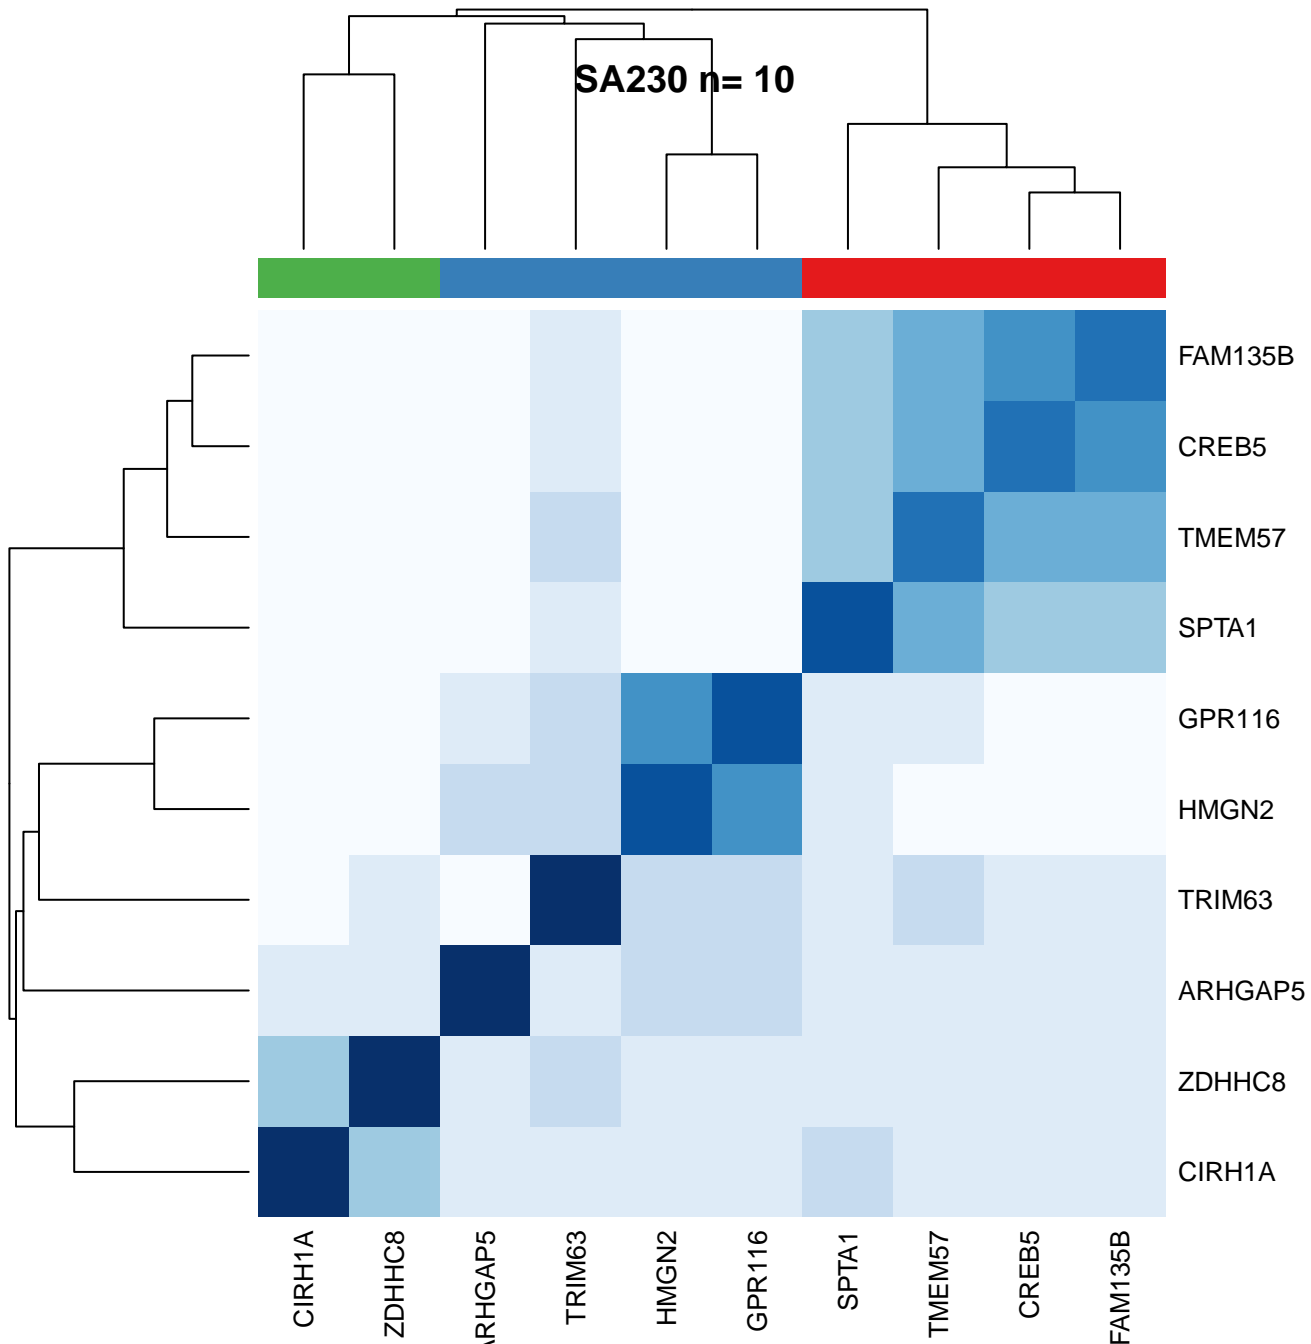

# SA230 n= 10

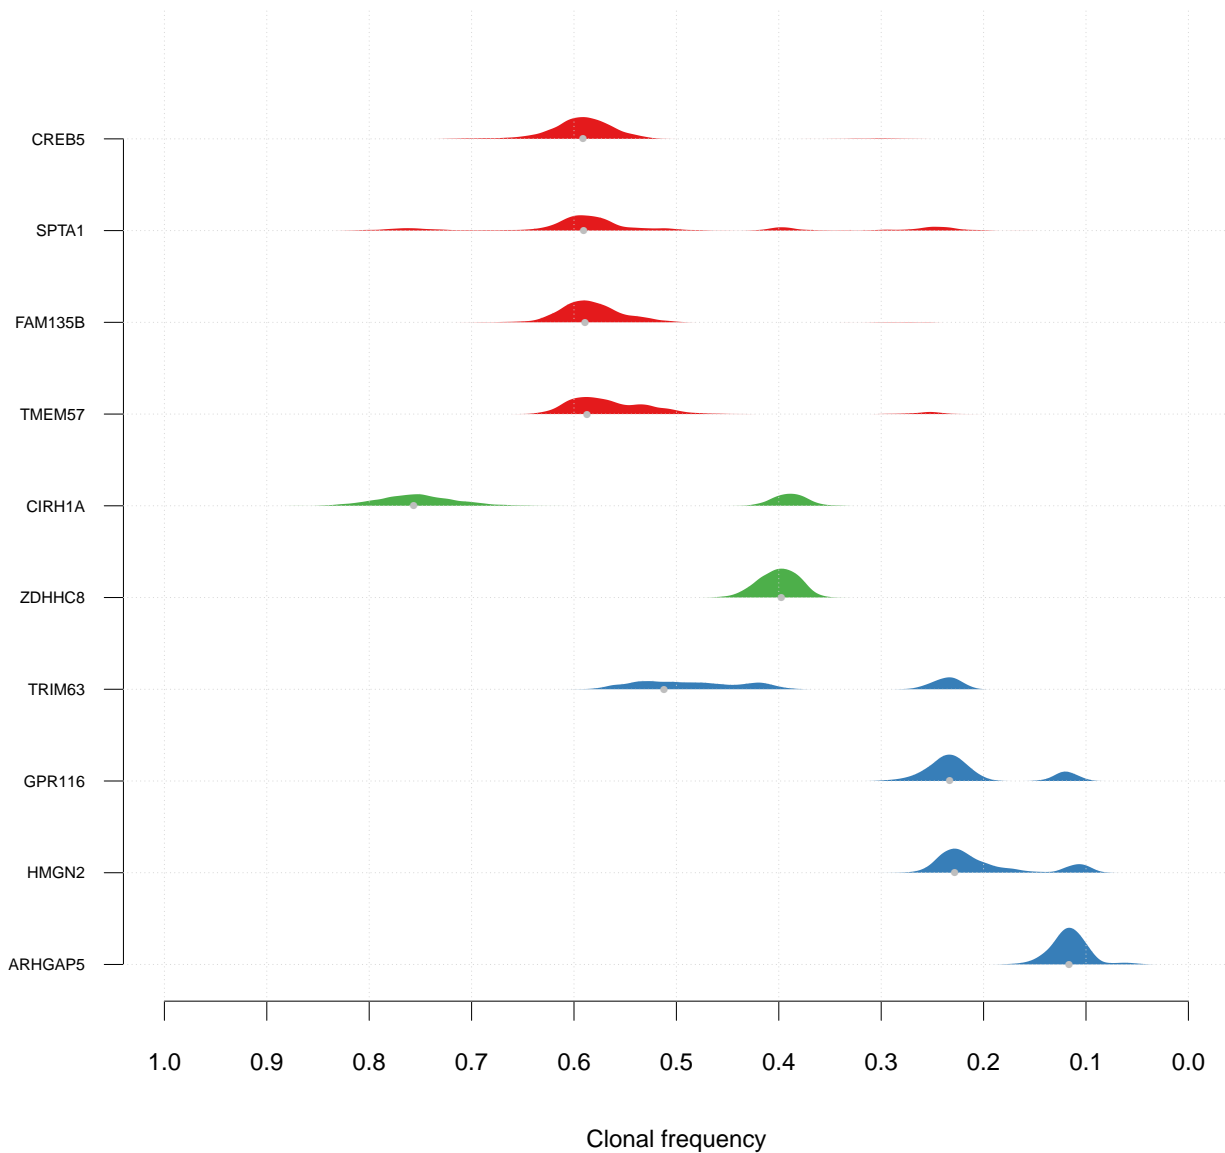

SA231 n= 26

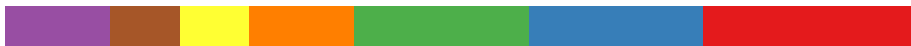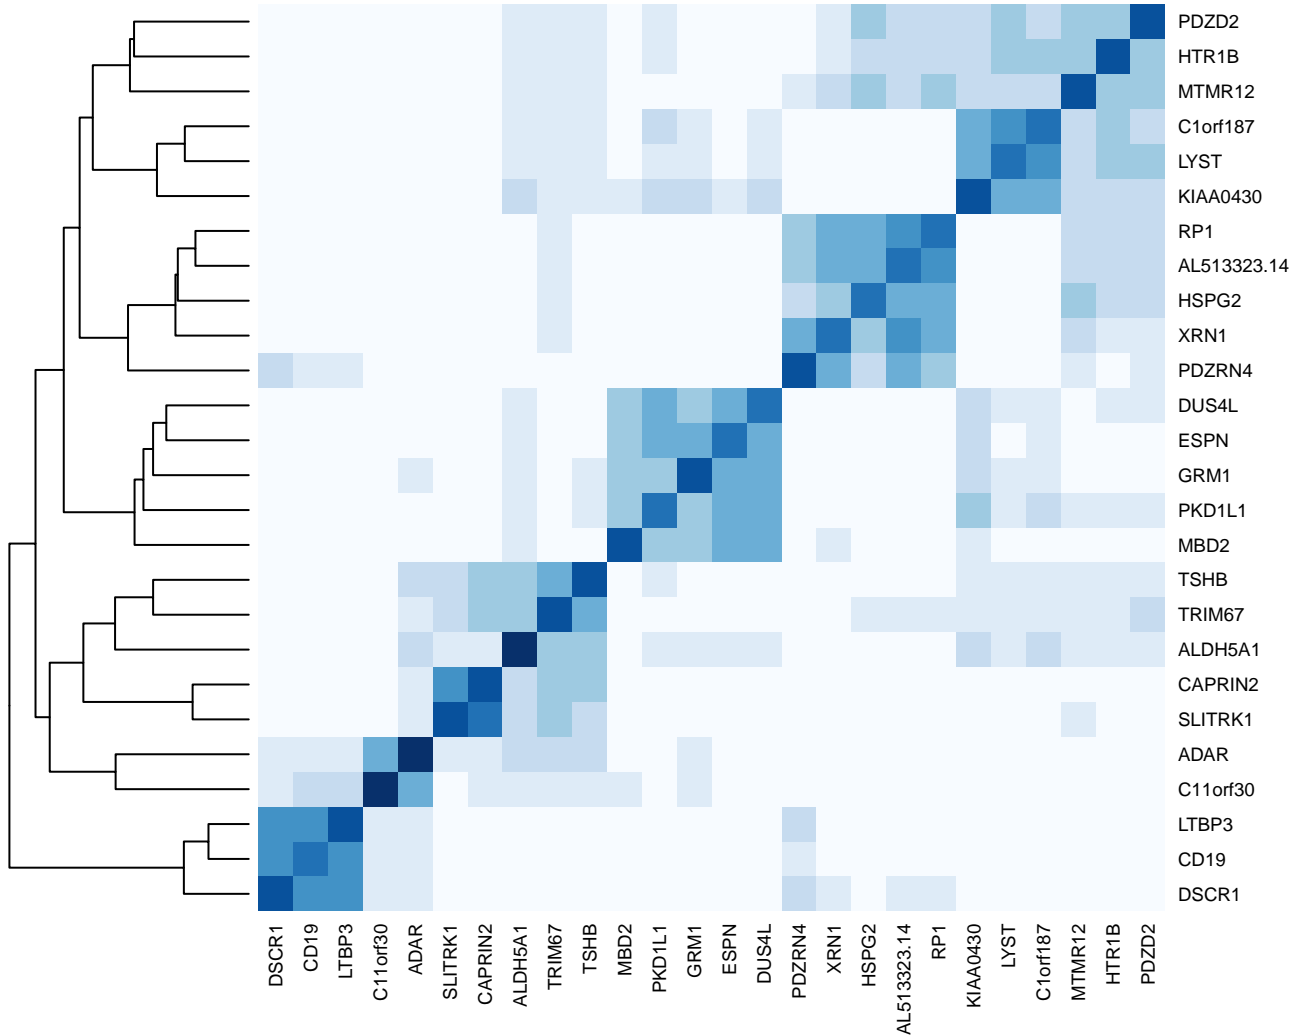

# SA231 n= 26

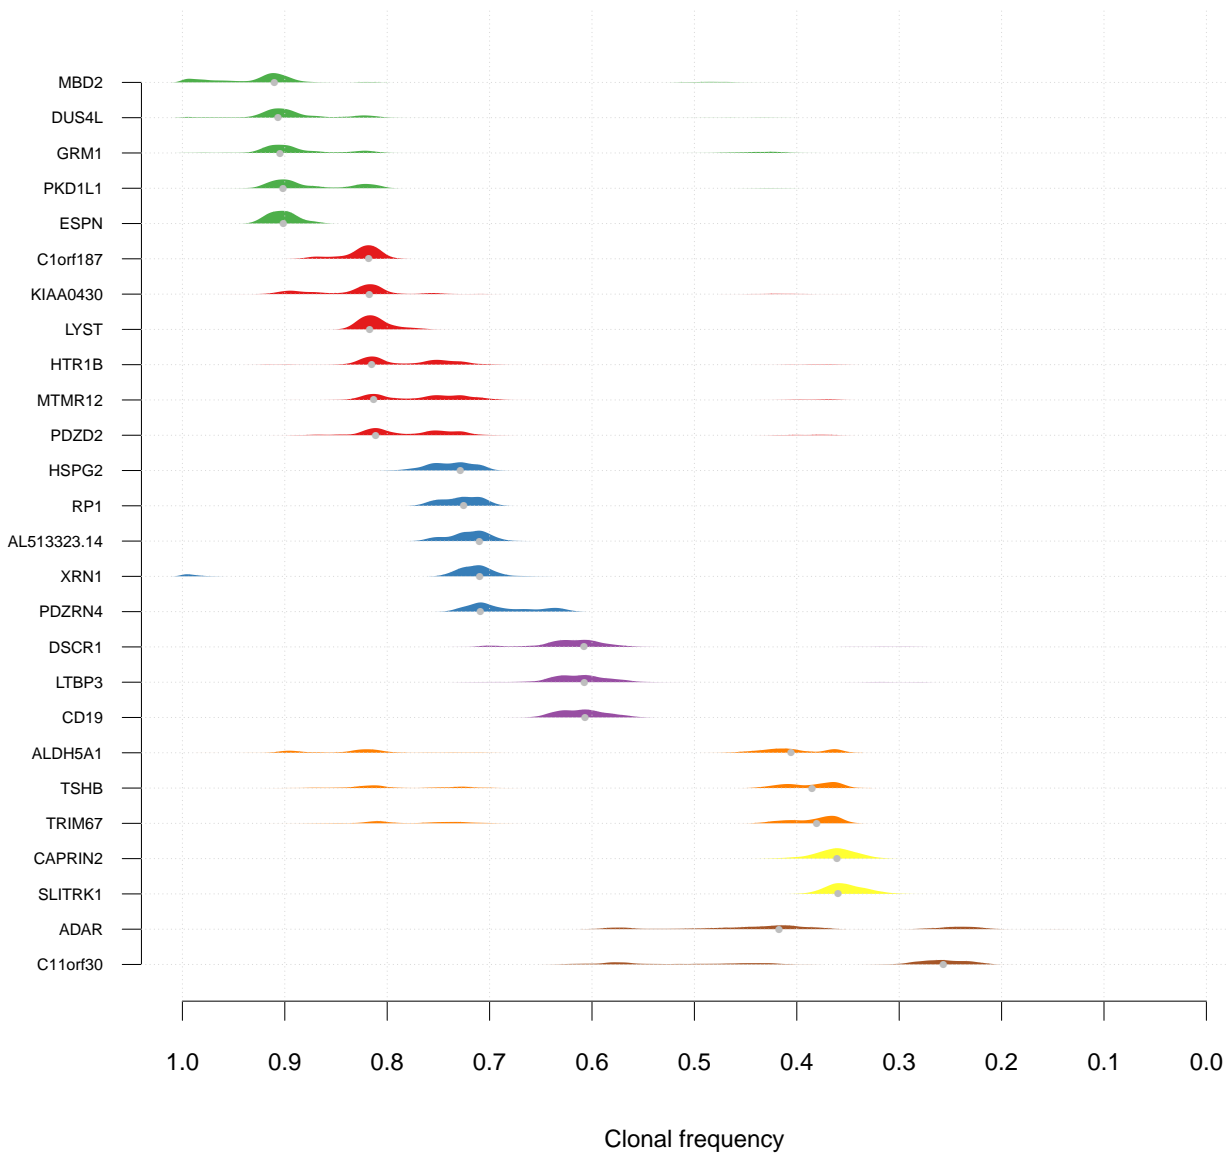

SA234 n= 21

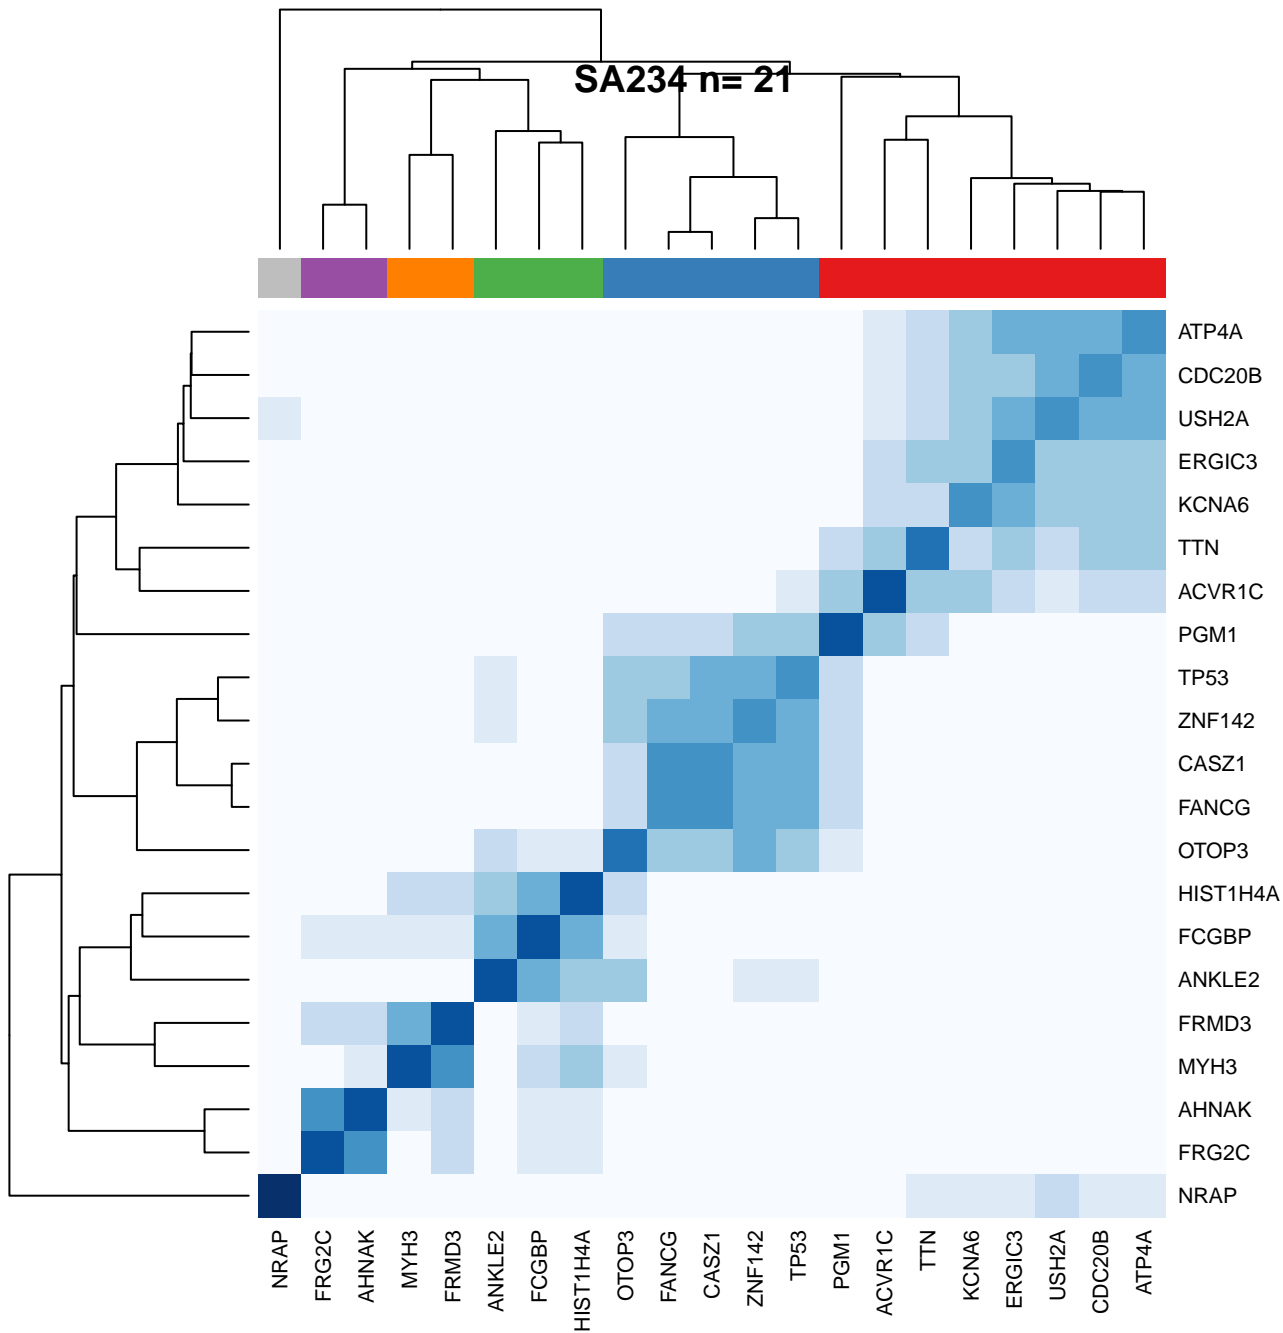

# SA234 n= 21

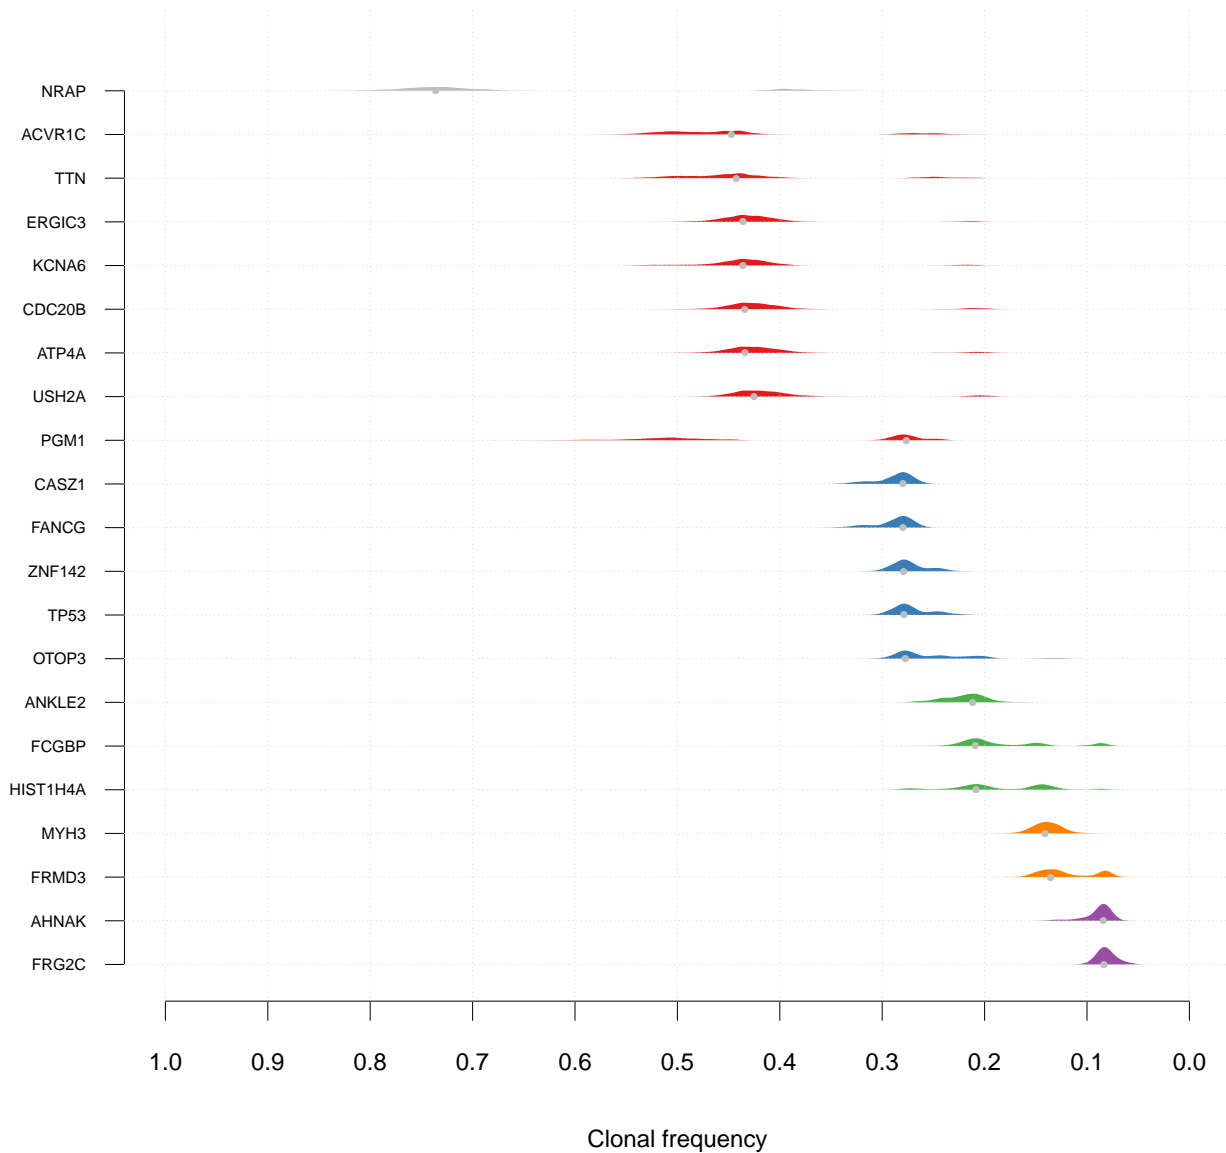





# SA235 n= 17

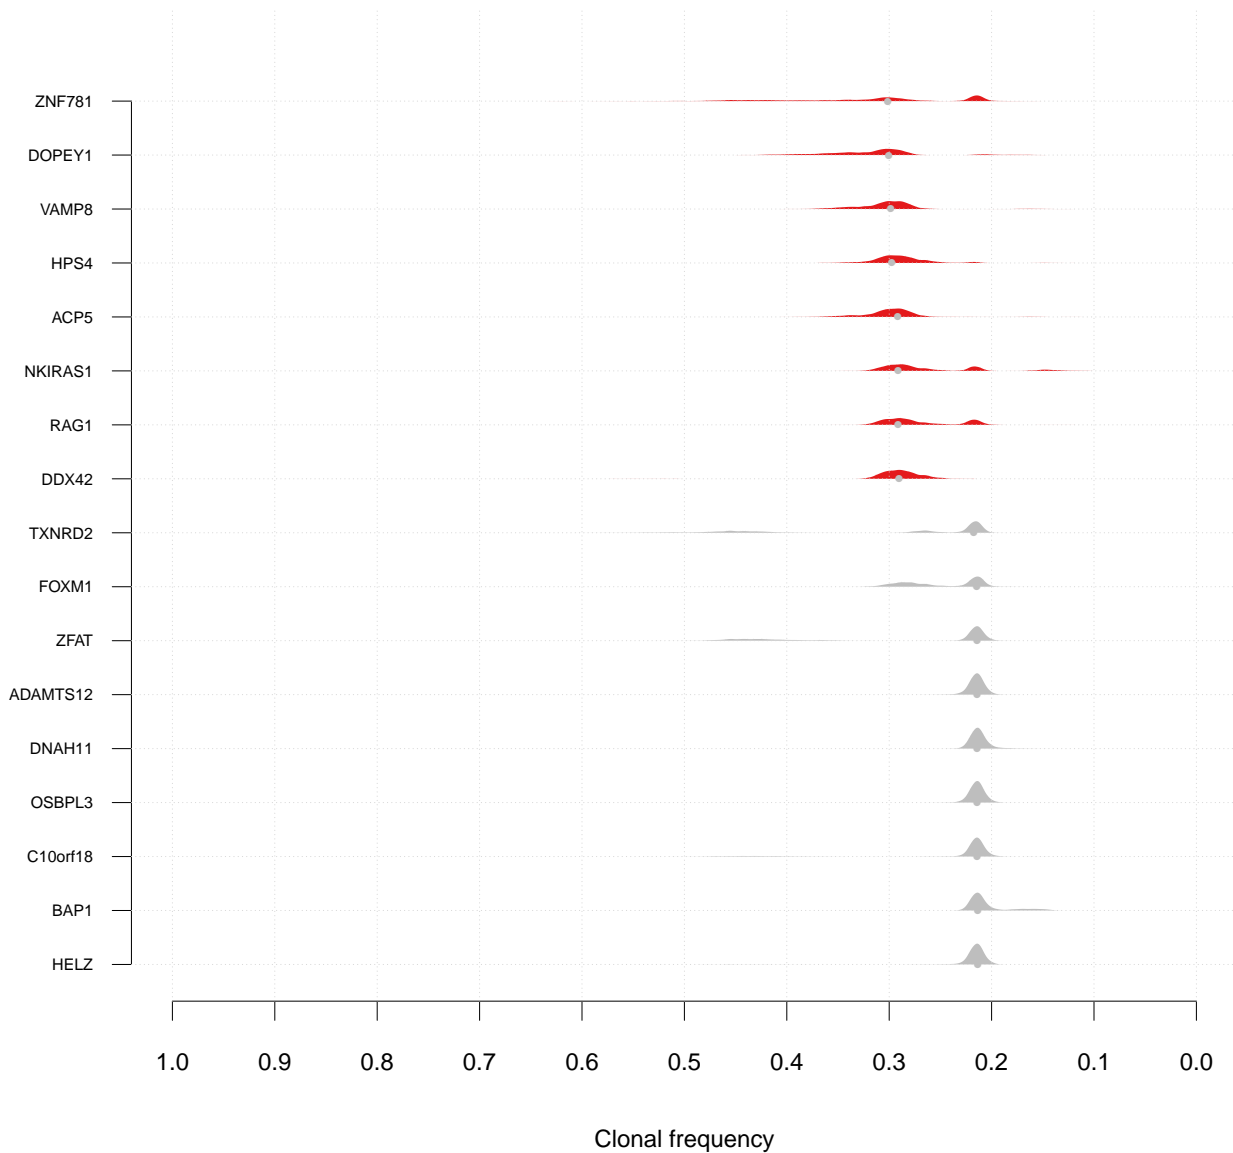

SA236 n= 45

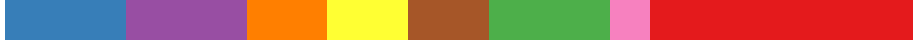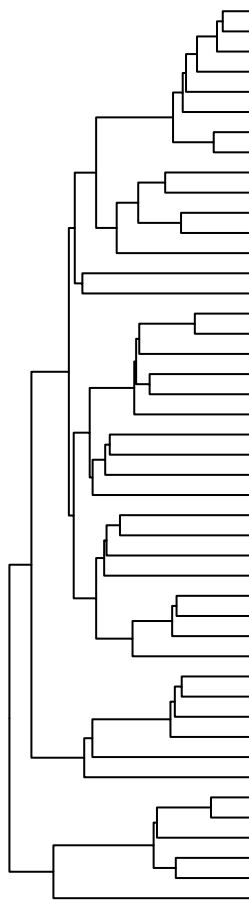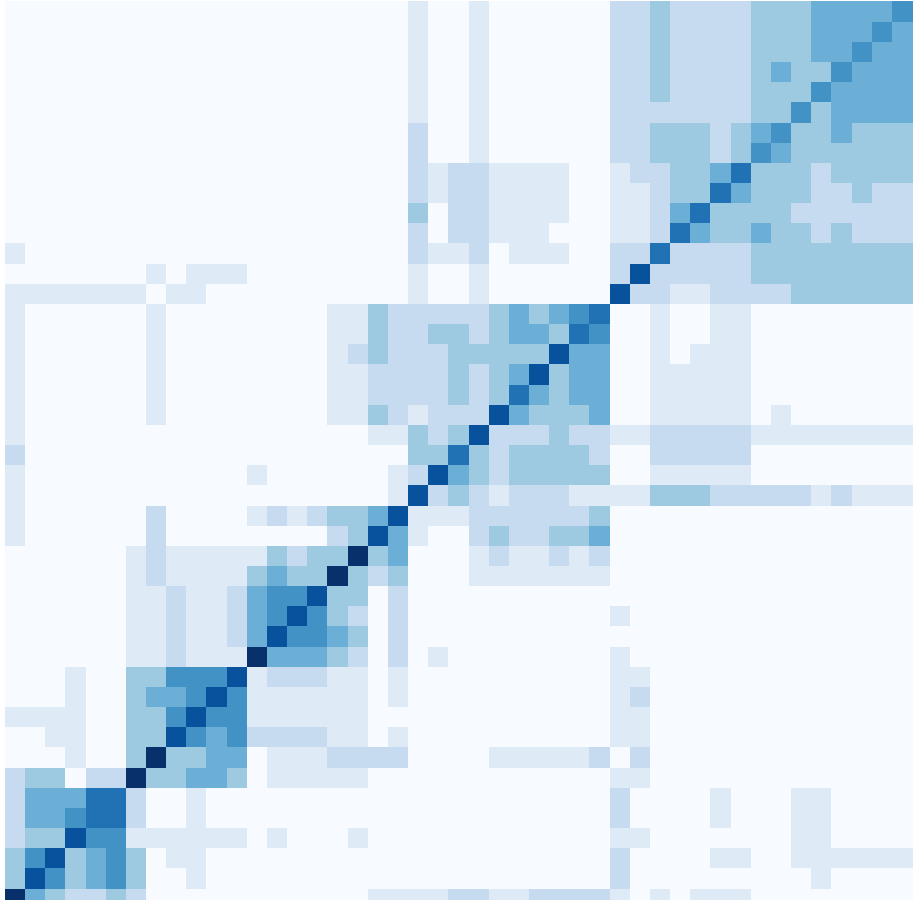

- YLPM1
- ARID2
- CATSPERB
- MORF4L1
- PTGFR
- MAP4K2
- TP53
- KIF5A
- HOXA2
- FLT3
- RBM17
- SH3BP2
- FLT3
- SPATA16
- ELSPBP1
- DDX31
- ZNF385D
- DENND2C
- WDFY3
- TUT1
- EXOSC2
- PTPRN2
- LAMA1
- HYDIN
- PCLO
- MCM3AP
- ACRBP
- PRDM8
- C6orf138
- MUC16
- FNBP1L
- KIAA0368
- XBP1
- TTN
- ALG10
- TPSD1
- IGF2BP2
- LRRC17
- BRD7
- MFF
- AC093283.3-1
- IRF3
- ICA1L
- GPR116
- RASA2

# SA236 n= 45

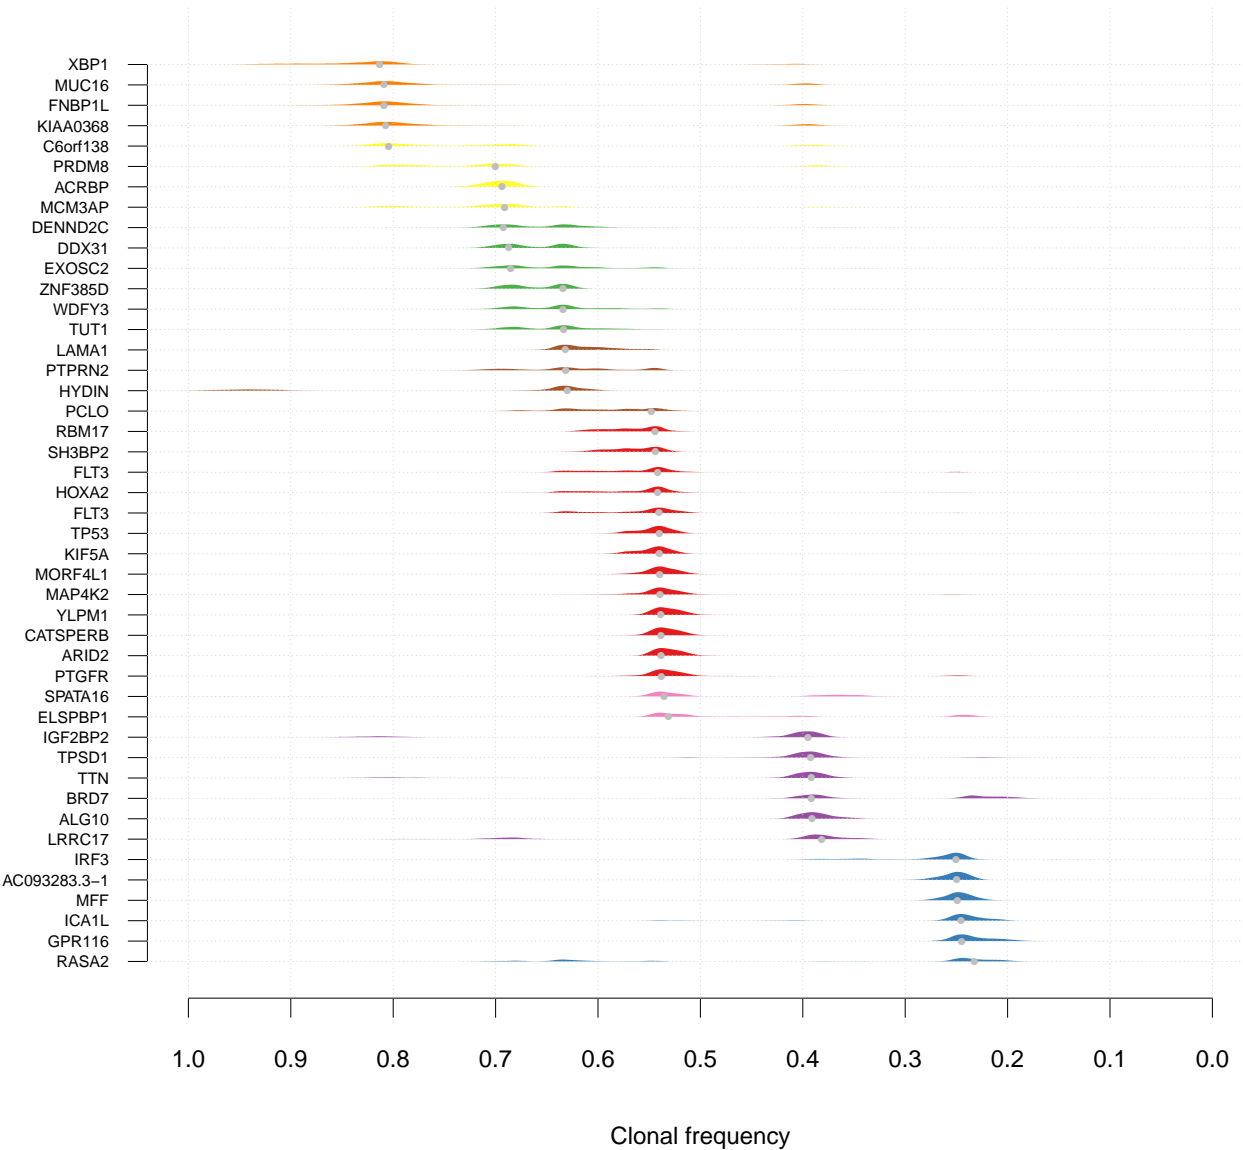

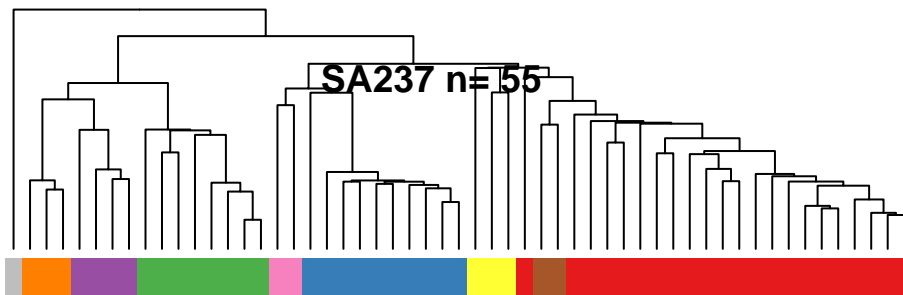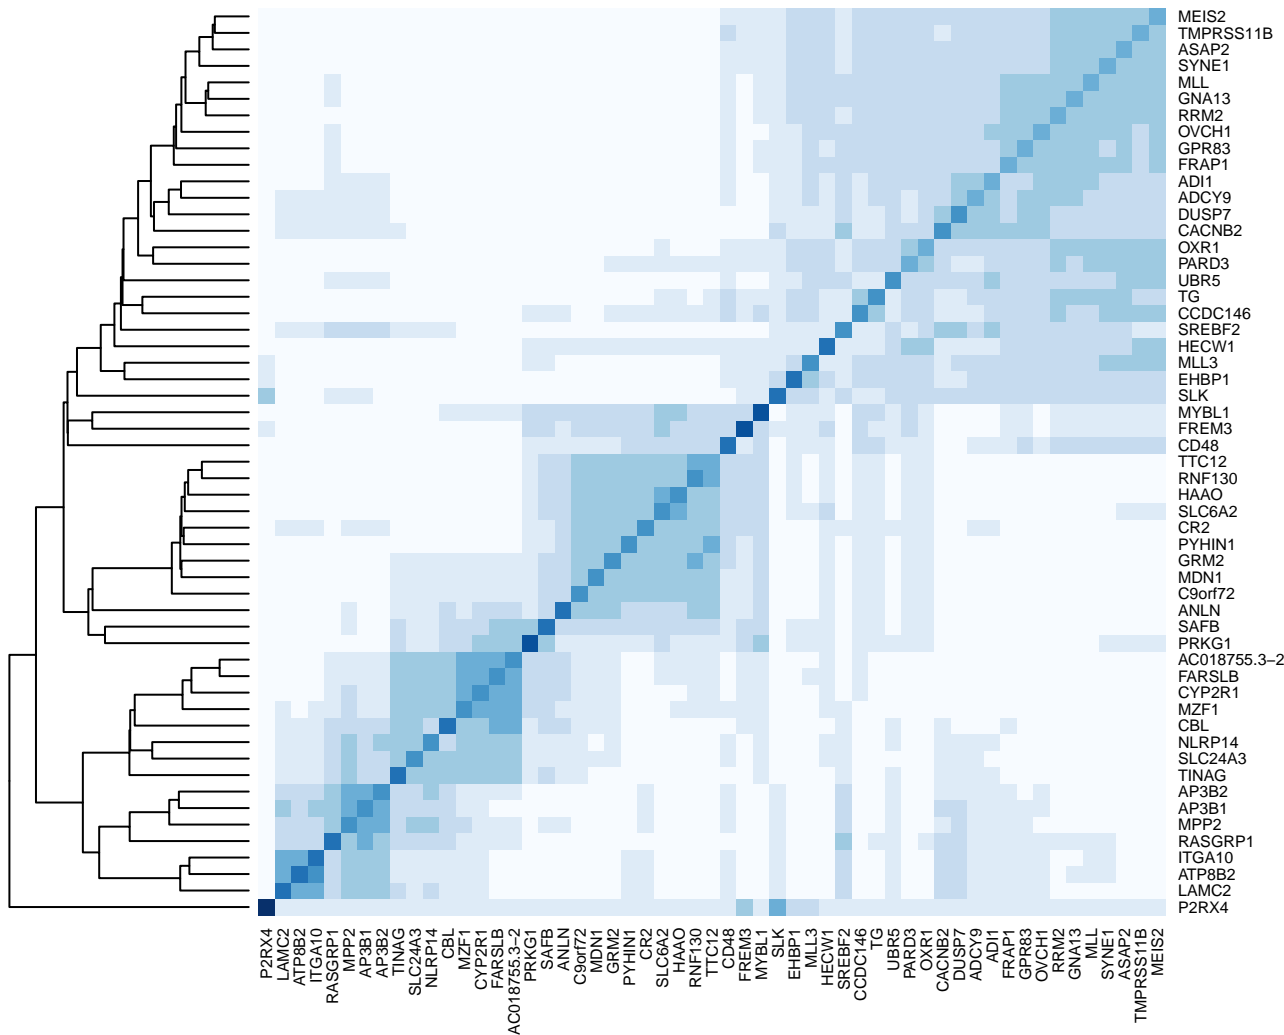

# SA237 n= 55

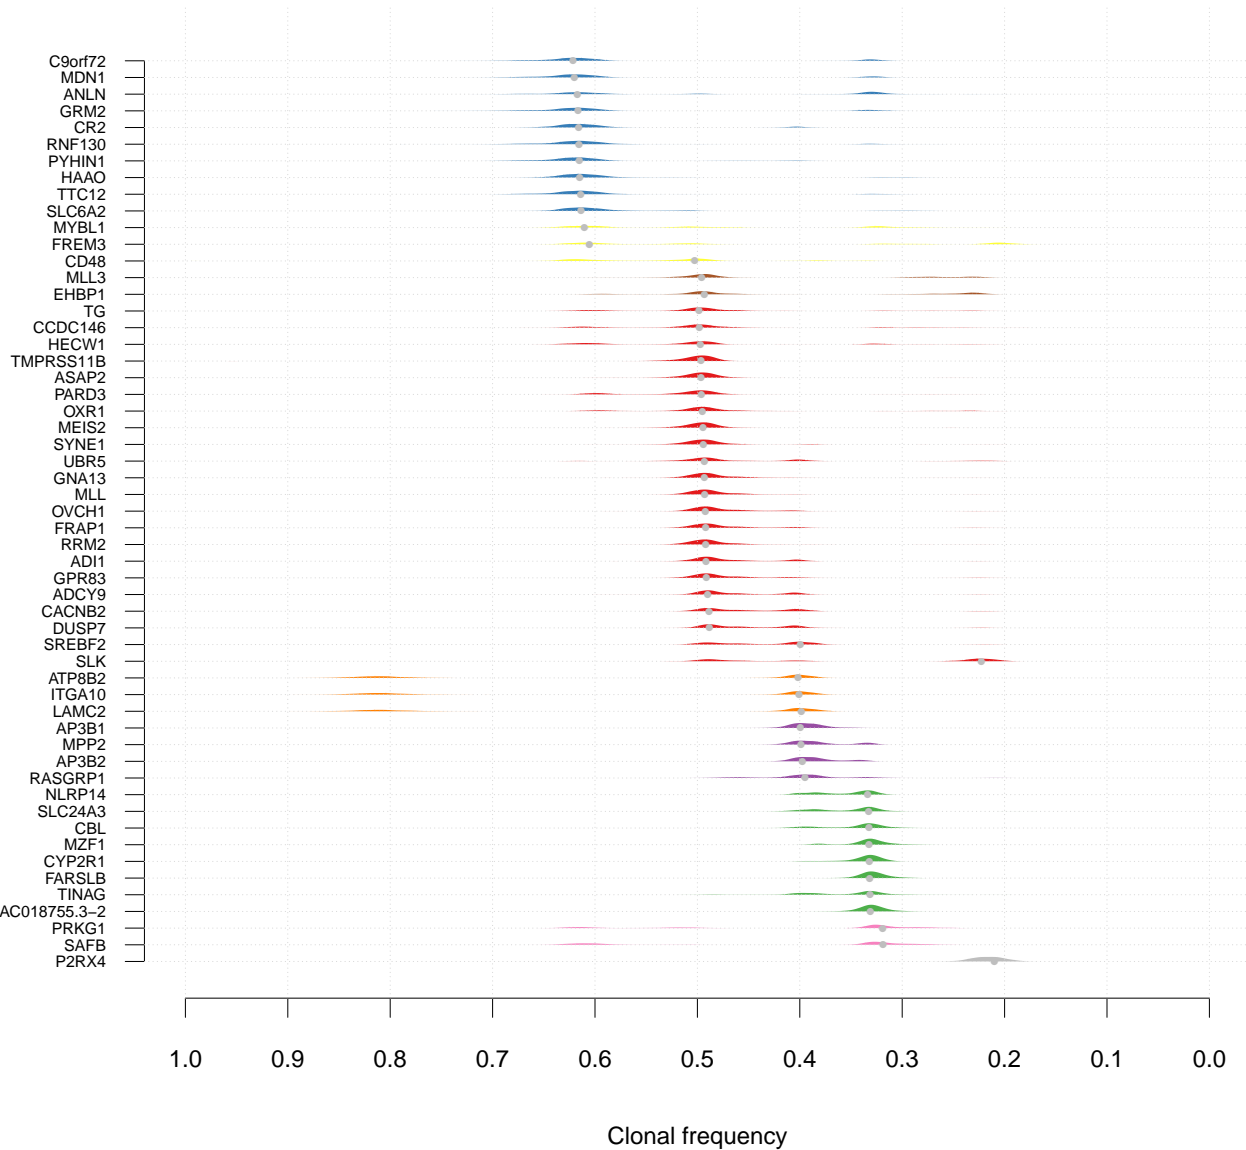

Figure S12

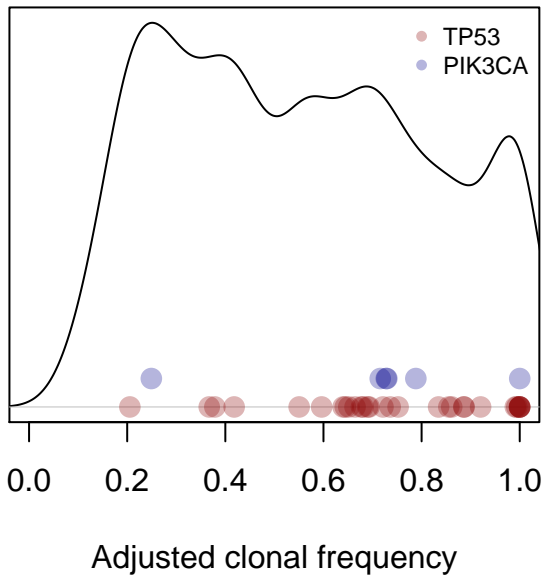

# Supplemental Methods for Shah et al: The clonal and mutational evolution spectrum of primary triple negative breast cancers

## 1 Biospecimen collection and ethical consent

We assembled a collection of 149 clinically annotated primary fresh frozen triple negative breast cancer specimens ( $n = 149$ ) each with a source of matched non malignant tissue for extraction of germline representative DNA. Tumour specimens were obtained from three tumour banks (BCCA Vancouver, breast tumour tissue repository; Alberta CBCF Breast Tumour Bank Edmonton, Cambridge UK, Addenbrooke's Hospital breast tumour bank) each with local REB/IRB approval for genomic studies of nucleic acids from breast cancer patients. This project was conducted under local BCCA REB/IRB projects H06-00289, H08-1230, H06-3199. The source of germline DNA was from peripheral blood lymphocytes in all but 4 cases. In these 4 cases histologically normal adjacent breast tissue was used. Initial case selection was based on clinical immunohistochemistry to define primary triple negative breast cancers obtained from surgical specimens, prior to the initiation of any chemotherapy or radiotherapy. Tumours typed as ER-, HER2- and PR- were initially selected for further review and re-validation of the IHC.

## 2 Histopathological review

Tissue sections were subject to expert histopathological review (GT) to assess the presence of invasive tumour, pre-malignant or benign changes, lymphocytic infiltration, necrosis and tumour cellularity. Tumour cellularity was scored visually in a semiquantitative fashion on sections taken from the cryosectioning runs used to isolate nucleic acids from each tumour. Cellularity values were binned such that 'low cellularity' corresponds to samples with <40% malignant cells, 'moderate cellularity' corresponds to 40% - 70% malignant cells, and samples with >70% malignant cells were considered to have 'high cellularity'. All but one sample classified as low cellularity were excluded from further analysis. The ER-, PR- HER2- immunophenotype was reconfirmed on sections or TMA cores from the cases included for analysis and additionally CK5/6 and EGFR were assessed by IHC. Subsequently SNP6.0 copy number analysis was also used to confirm the absence of HER2 amplification in each case.

## 3 Sequence data generation

Paired end RNASeq libraries were generated as described in Wiegand et al [1]. Exome capture was achieved through solution hybrid selection with the Human All Exon kit SureSelect Target Enrichment System (Agilent) version 1 for Illumina Genome Analyzer paired-end sequencing [2] and libraries were prepared as described in [3]. SOLiD whole genome shotgun libraries for 15 tumour/normal pairs were generated as previously described [4]. Details of per case coverage for each sequencing method are presented in Table S2. Targeted sequencing interrogating the exons and splice sites of 29 genes in 159 additional breast cancers (82 ER+ and 77 ER-ve, tumour and matched normal) was undertaken using exon-specific PCR and cDNA probe-based capture. The amplified/captured products were sequenced on the Illumina HiSeq 2000 platform.



## 4 Exome sequence data analysis and mutation validation

**Sequence alignment and mutation calling** Sequence reads were aligned to the human reference sequence (NCBI build 36, hg18) and a compacted reference composed of the targeted exons. Alignments were performed using Maq v0.7.1 [5] using default parameters. Uniquely aligned reads were kept for downstream analysis. Somatic SNVs were called using JointSNVMix (<http://compbio.bccrc.ca/software/jointsnvmix/>) [6] combined with mutationSeq [7], from the resulting tumour and normal pair of BAM files for each case. We used a marginal posterior probability threshold of 0.2 to nominate somatic SNVs, aiming to err on the side of sensitivity and minimize false negatives. All non-synonymous mutations as profiled by MutationAssessor [8] (<http://mutationassessor.org>) were carried forward for validation by deep amplicon sequencing. Indels were predicted using samtools v0.1.7 pileup command from BAM files. Indels present in at least 10% of reads covering the position of interest, predicted to affect a coding sequence, and for which there were 0 reads containing the same indel in the corresponding normal DNA library were carried forward for validation as candidate somatic indels.

### 4.1 Validation of mutations

{ secrevalidation }

**Revalidation sequencing** Somatic mutation predictions were subjected to rigorous validation by targeted deep amplicon sequencing in the tumour and normal DNA templates. Genomic DNA was prepared as previously described [9]. Automated primer design was performed using Primer3 (Rozen and Skaletsky, 1998) and custom scripting. Primer pairs were designed to place the variant position within 75bps of either end of the amplicon and to be between 50-300bp in length. Primer pairs were independently validated by in silico PCR followed by BLAT against the human genome to ensure that the correct target was generated and that the resulting amplicon was unique within the genome. DNA primers were synthesized in 96-well plates at a 25nmol scale with standard desalting (IDT Coralville, IA USA). Polymerase cycling reactions were set up in 96-well plates and comprised of 0.5  $\mu$ M forward primer, 0.5  $\mu$ M reverse primer, 1-2 ng of gDNA template, 5X Phusion HF Buffer, 0.2  $\mu$ M dNTPs, 3% DMSO, and 0.4 units of Phusion DNA polymerase (NEB, Ipswich, MA, USA). Reaction plates were cycled on a MJR Peltier Thermocycler (model PTC-225) with cycling conditions of a denaturation step at 98°C for 30 sec, followed by 35 cycles of [98°C for 10 sec, 69°C for 15 sec, 72°C for 15 sec] and a final extension step at 72°C for 10 min. PCR reactions were visualized on 3% agarose (NuSieve) gels for 2hrs at 170V to assess PCR success. Successful reactions were manually pooled (4ul per well) by template and subjected to Illumina library construction using a modified paired-end protocol (Illumina, Hayward, USA). This involved A-tailing of the amplicons and ligation to Illumina PE adapters. Adapter-ligated products were purified on Qiaquick spin columns (Qiagen, Valencia, CA, USA) and PCR-amplified using Phusion DNA polymerase (NEB, Ipswich, MA, USA) in 10 cycles using PE primer 1.0 (Illumina) and a custom multiplexing PCR Primer [5-CAAGCAGAAGACGGCATAACGAGATNNNNNNCGGTCTCGGCATTCTGC TGAACCGCTCTTCCGATCT-3] where NNNNNN was replaced with unique fault tolerant hexamer barcodes for each template. PCR products of the desired size range were purified away from adapter ligation artifacts using 8% PAGE gels, pooled and DNA quality was assessed and quantified using an Agilent DNA 1000 series II assay (Agilent, Santa Clara CA, USA) and Nanodrop 7500 spectrophotometer (Nanodrop, Wilmington, DE, USA) and subsequently diluted to 10nM. The final concentration was confirmed using a Quant-iT dsDNA HS assay kit and Qubit fluorometer (Invitrogen, Carlsbad, CA, USA). For sequencing, clusters were generated on the Illumina cluster station using v4 cluster reagents and paired-end 75bp reads generated using v4 sequencing reagents on the Illumina GA<sub>ii</sub> platform following the manufacturer's instructions. Between the paired 75bp reads a third 7 base pair read was performed using the following custom sequencing primer [5- GATCGGAAGAGCGGTTTCAGCAGGAATGCCGAGACCG] to sequence the hexamer barcode. Image analysis, base-calling and error calibration was performed using v1.60 of Illumina's Genome analysis pipeline.

**Revalidation data analysis** PCR primers were designed to revalidate candidate somatic mutations (SNVs and indels) on whole genome amplified material for both tumour and normal DNA. Resulting amplicons were indexed, pooled and sequenced deeply using 75bp paired end libraries as described above. Reads were separated out by 6bp index using a Hamming distance function with a maximum mismatch tolerance of 1,

and aligned (Maq v0.7.1) to a reference database containing only the targeted loci for each case. (Note, we compared results to BWA [10] and there were no observable differences in the validated list of mutations). For each targeted sequence, we inferred the presence/absence of the targeted variants using a Binomial exact test as previously described [9]. In addition, we imposed the following criteria in order to classify a 'validated' somatic mutation:

- both tumour and normal data had a minimum of 50 reads covering the targeted position
- the Binomial exact test result (Benjamini Hochberg adjusted p-value) for the tumour  $< 0.01$
- the Binomial exact test result (Benjamini Hochberg adjusted p-value) for the normal  $\geq 0.01$
- the proportion of reads indicating the variant in the tumour  $\geq 5\%$

For indels, we required:

- a minimum of 10% of all reads aligned to the position containing the indel
- at least 3 reads containing the indel
- a minimum local realignment score of 300

One validation library was single end. For this library, we aligned the reads using GSNAP [11] - a gapped aligner capable of detecting indels in single end reads.

## 5 RNASeq data analysis and validation

**Sequence alignment and SNV/indel calling for RNASeq** SNVs for RNASeq were analysed as previously described [9] using SNVMix [12]. Paired end libraries were aligned using a modified version of BWA to a reference consisting of the human genome reference (NCBI build 36, hg18) and a database of known exon-exon junctions obtained from different annotation databases (Ensembl [13], RefSeq [14], Ace-View [15]). Sequences representing exon-exon junctions were designed to require at least a 4 base pair overlap for split-reads. Considering a read length of 50 base pairs, 46 base pairs on either side of the exon-exon junction were concatenated to represent each exon-exon junction. These alignments were used as the information source for differential expression analysis as well as measurement of exon abundance and intron usage. Additionally, de novo splice sites were predicted using HMMSplicer [16]; these predictions served to determine the effects of splice-site mutations in the transcriptome.

Alignment of RNA-Seq short reads was done using a modified version of BWA (base version 0.5.5 [17], patch unpublished). In order to apply the Burrows-Wheeler transform [18], upon which BWA is built, the reference sequence has to be concatenated into one string. When including exon-exon junction sequences to the alignment reference, these are appended to this string in order for the aligner to consider them as part of the target space. This procedure can cause mapping problems when working with paired end tags. In the last stages of alignment, BWA takes advantage of paired information to increase alignment specificity. When reads map to multiple places, whether with zero or more mismatches, pairing information can be used to determine the best alignment position for the pair. In order to optimize this process, BWA measures the distance between the reads of each pair at each mapping position using the concatenated reference as a base and comparing this distance to the estimated fragment size. Alignment positions in which the distance between the reads (too short or too long) or their alignment orientation do not match are discouraged. Given that the exon-exon junction sequences are appended to the genome reference, any pair where one or both reads map to a junction are broken due to the concatenated distance between them. Our modifications make BWA aware of the true position of each exon-exon junction in the reference sequence, thus eliminating some of the mapping issues described above.

Non synonymous SNVs and indels predicted from RNASeq screened against dbSNP and 1000genomes data that were recurrent by gene in at least 3 cases were submitted for validation using resequencing methods described as above for exome capture libraries.

**Gene expression analysis** Gene expression of Ensembl54 gene models was estimated by the number of fragments that covered them. A fragment was assigned to a gene when at least one read in the read-pair overlapped an exon in the gene, reads with BWA-assigned mapping quality lower than 10 were discarded. In order to make expression values comparable across libraries, we applied quantile normalization [19] of fragment counts in log<sub>2</sub> space. Akin to microarray analysis, quantile normalization has been proposed as a viable method for RNA-Seq data that effectively protects against biased estimates due to over-representation of highly expressed genes [20].

**PAM50 classification** Normalized expression values (as described above) were used to classify the triple negative breast cancer samples into two groups (*Basal* and *Other*) using the 50-gene classifier described by Parker et al. [21]. Of the 80 triple negative tumours 48 were classified as *basal*: and 32 as *other*; the latter group included any sample labeled by PAM50 as LuminalA, LuminalB, Her2 or Normal-like. Unsupervised hierarchical clustering (method: Ward, distance: spearman correlation) was performed to assess the reproducibility of PAM50 groupings. At  $k = 3$  clusters there is a strong group of 16 samples labeled *Other*, a group formed by 6 libraries obtained from normal tissue and a group of 64 samples with mixed labels; at  $k = 4$  this last group is split into a strong *Basal* cluster ( $n = 28$ ) and a mixed one ( $n = 36$ ). Unsupervised hierarchical clustering thus independently supported the primary classification by PAM50 into a relatively homogenous "basal" expression group and a more heterogeneous "other" TNBC group.

**Gene fusion analysis and PCR validation** Gene fusions from paired end RNASeq data were predicted using *deFuse* v0.3.6 [22]. The deFuse predictions were filtered by thresholding on the deFuse probability at a value of 0.5, corresponding to a false positive rate of 0.93 and a false negative rate of 0.15. We identified, from the filtered deFuse predictions, those fusions that were corroborated by a genomic breakpoint in the Affymetrix SNP 6.0 copy number analysis. A fusion was considered corroborated by a genomic breakpoint if that breakpoint was predicted to occur within the boundaries of one of the genes involved in the gene fusion. From the list of genomic breakpoint corroborated fusions, we selected 64 events for validation.

Where available, we sought to identify evidence of genomic rearrangement to corroborate fusion predictions. We performed a targeted search for supporting Whole Genome Shotgun Sequencing (WGSS) read pairs in SOLiD data for 15 tumour genomes. For each fusion, a paired end alignment was considered supporting if it aligned less than 200,000 nucleotides downstream of the predicted fusion boundary in each gene. Supporting paired end alignments for each fusion were clustered, and the largest cluster for each was identified. Sequences for each breakpoint were assembled from paired end alignments as described previously [23]. In total, we identified 29 genomic breakpoints supporting gene fusions. In addition, 5 tumour genomes were sequenced using paired end whole genome shotgun sequencing at low coverage (~8x) using Illumina GA<sub>ii</sub>. For these genomes, we used comrad v0.0.1 [23] (<http://compbio.cs.sfu.ca>) to identify fusions with supporting genomic breakpoints.

The expression of the fusion transcripts were validated by RT-PCR followed by Sanger sequencing. In brief, reverse transcription was performed using SuperScript III (Invitrogen Canada Inc., Burlington, ON) and 200 ng of RNA from the source tumour. PCR was carried out using Finnzymes Phusion<sup>TM</sup> High Fidelity DNA polymerase (New England BioLabs Inc., Pickering, Ontario) as well as forward T7 tagged and M13 reverse tagged PCR primers specifically designed to each predicted rearrangement. Products were visualized on 1.5% agarose gel prior to submission for Sanger sequencing at MacroGen (Rockville, MD, USA).

## 6 Network and pathway analysis using Reactome and EnrichmentMap

For network and pathway enrichment analysis for mutations, differential expression and copy number analysis, we used the Reactome FI [24] Cytoscape [25] plugin in Cytoscape v2.8.1. Significantly enriched pathway gene sets were exported and analysed using EnrichmentMap [26] to determine relationships between pathways. For this analysis, gene sets in GMT format were provided by the Reactome FI authors (Wu, personal communication). Patient-pathway clustering was performed by projecting a patient-gene matrix containing occurrences of mutations in a given gene in a given patient to a patient-pathway matrix

{ sec:cytoscape }

containing occurrences of mutations in a given gene belonging to a pathway (or geneset) in a given patient. This patient-pathway matrix was then clustered using hierarchical agglomerative clustering with Euclidean distance and Ward linkage. We acknowledge the redundancy induced by the many-to-many relationship structure of genes in pathway gene sets, however to preserve biological interpretability and to maintain identifiable gene sets in Reactome, genesets were kept unaltered.

## 7 Affymetrix SNP6 analyses

### 7.1 Normalization of intensities

The Affymetrix SNP6.0 arrays for both tumour and normal samples were all independently normalized using the single array method CRMAv2 [27]. We applied the default settings using the following tags: ACC,ra,-XY,BPN,-XY,AVG,A+B,FLN,-XY. For each sample, allelic-crosstalk calibration, probe sequence effects normalization, probe-level summarization, and PCR fragment length normalization was performed. The following annotation files were used (Feb 14, 2008): Chip definition file (GenomeWideSNP\_6.Full.cdf), Unit fragment-length (GenomeWideSNP\_6,Full,na24,HB20080214.ufl), Unit genome position (GenomeWideSNP\_6,Full,na24,HB

### 7.2 Normalization using a reference

Log ratios were computed for both tumours and normals by normalizing each array independently against a reference. Due to the incomplete pairings of tumours and matched normals, we needed to generate a pooled reference from all the available normals.. However, because we are also attempting to identify CNVs in addition to CNAs in the tumours, using a simple pooled reference (median intensity across all normals for each probe) can “subtract” inherently frequent (> 50%) copy number events in the normals from the tumours. For example, using a reference which contains a region that is deleted in more than half the normal samples will result in an artificially amplified signal when computing the ratio for a true neutral signal in the tumour sample. Therefore, we generated a “masked” reference from the normal dataset that was free of inherent copy number polymorphisms, while accounting for systematic biases.

We started with CRMAv2 normalized intensities of the matched normal samples and computed log ratios using a randomly permuted reference. Next, probe-level discrete copy number calls were made using a 6-state hidden Markov model (described below). For each sample, we identify probes that are predicted as gains or losses. Next, we retrieved the original normalized intensities that we started with and masked out the probes we identified in the previous step. Finally, we computed the median (pooling) intensity value for each probe across all samples using only the remaining values after masking. The result is a single vector of median values, which makes up the masked reference. In this approach, the masked reference improves analysis of germline CNVs in the tumours by serving as a true base-line vector of intensities for log ratio calculations and allowing all true alteration signals in the data to be detected.

### 7.3 Segmentation and copy number analysis of 28 Affymetrix SNP6 normal samples using a 6-state HMM

We applied the 6-state HMM to 28 normal samples to detect germline CNVs by returning segment and probe-level copy number. The 6-state HMM is a modified version of CNA-HMMer [28] that has been adapted to analyzing high-density genotyping arrays such as the Affymetrix SNP6.0 platform and whole genome shotgun data. Another significant extension is the inclusion of additional copy number states, which offers a more intuitive interpretation of DNA dosage in cancer. The new discrete copy number state space included neutral (NEUT), homozygous (HOMD) and hemizygous (HETD) deletions, gain (GAIN), amplification, (AMP) and high-level amplification (HLAMP).

$$K_{CNA} = \{HOMD, HETD, NEUT, GAIN, AMP, HLAMP\} \quad (1) \quad \{eq:Kcna\}$$

## 7.4 Segmentation and copy number analysis of 104 Affymetrix SNP6 tumour samples using HMM-Dosage

We performed copy number analysis on the 104 tumour samples using HMM-Dosage (Ha et al, manuscript in preparation). The algorithm is designed to detect and distinguish the complete set of somatic and germline copy number events in cancer genomes interrogated by SNP array data. This model extends the 6-state HMM (above) by using 5 additional CNV states to represent the analogous copy number status

$$K_{CNV} = \{CNVHOMD, CNVHETD, CNVGAIN, CNVAMP, CNVHLAMP\}. \quad (2) \quad \{eq:Kcnv\}$$

The model performs segmentation on log ratios of intensity data and assigns a discrete copy number status  $k_t \in \{K_{CNA}, K_{CNV}\}$  to the each latent variable,  $Z_t$ , for all probes  $t \in \{1 \dots T\}$ . Log ratios,  $Y = \{y_1, \dots, y_T\}$ , are observed values modeled using Student's-t densities in the emission component of the HMM, conditional on  $Z_t = k_t$ . Spatial information is captured using a non-stationary transition matrix,  $A_t$ , that encodes position-specific probabilities of CNVs and CNAs at each probe  $t$ . In order to distinguish between somatic copy number alterations (CNAs) and germline copy number variants (CNVs), HMM-Dosage probabilistically incorporates CNV information as a prior to the transition matrix.

The CNV prior was computed as probe-level CNV frequencies by combining (weighted averaging) 2 datasets: 482 normal samples from METABRIC [29] and an external dataset of 450 HapMap normal samples whose CNVs were predicted by [30]. Because the HapMap dataset contains males, we excluded chrX frequencies and simply used the chrX frequencies from the 482 normals.

The parameters of the Student's-t distributions are unobserved and estimated using the expectation maximization (EM) algorithm for each sample, independently. Initial parameters for the  $K_{CNA}$  states of the Student's-t mixture were empirically determined using 45 SNP6 breast cancer cell line samples in the COSMIC [31] dataset. First, independently for each cell-line sample, we fit the log ratios to a 6-state Gaussian mixture model using EM. Subsequently, the converged Gaussian mixture parameters are used as initial parameters for fitting a 6-state Student's-t mixtures in the 6-state HMM (again, using EM). Finally, we averaged the converged Student's-t parameters for each state across the 45 cell lines. These averaged parameters became the initial  $K_{CNA}$  parameters to Student's-t emission of HMM-Dosage. Initial parameters for  $K_{CNV}$  were set by hand to theoretical values  $\log_2([0.5, 1, 3, 5, 7]/2)$ .

The optimal state sequence,  $Z_{1:T}$ , which represents the copy number prediction for each probe, is computed using the Viterbi algorithm.

In general, HMM-Dosage was tuned to be conservative in calling CNVs as to avoid misclassifying the more important CNA calls. Therefore, the results were post-processed by comparing against the CNV map (derived from 482 normals and HapMap270) such that CNA segments that had at least 25% reciprocal genomic overlap with a segment of the same copy number state in the CNV map were converted to germline state.

## 7.5 Genomic instability

For each of the 80 genomes analyzed by Affymetrix SNP6 arrays that have RNA-seq data, genomic instability (GI) was computed as the proportion of genome altered by basepair. For this analysis, we calculated the total length of all CNA events (HOMD, HETD, GAIN, AMP, HLAMP) by using the segmentation boundaries predicted by HMM-Dosage. This value is then divided by the total length of all predicted segments, including NEUT. This calculation is also done for each CNA type to reveal the relative contribution of each alteration event type to GI.

We also compared GI between basal and non-basal PAM50 subtypes. The basal subtype shows higher GI for all CNA types.

## 7.6 Gene alterations

In order to identify the genes that are altered by copy number changes, we searched for overlap of segments with gene regions. The gene annotations and coordinates are given by Ensembl 54 (hg18). The genes selected for analysis are those annotated as protein-coding, totaling to 20878 genes.

We generate two types of patient-by-gene copy number matrices to capture two perspectives of gene alterations. The first type is the 'call' matrix,  $C \in \mathbb{Z}^{P \times G}$ , which is populated with values representing discrete copy number state calls. The second is the log ratio matrix, which contains segment median log ratios. For this latter matrix, genes overlapping multiple segments are summarized using two different approaches to produce  $L_a \in \mathbb{R}^{P \times G}$  and  $L_s \in \mathbb{R}^{P \times G}$ . For each patient  $p \in P$  and each gene  $g \in G$ , we identify segment  $s$  that overlaps  $g$  and assign  $C(p, g)$  with the copy number state of  $s$  and  $L_a(p, g)$  and  $L_s(p, g)$  with the median log ratio of the probes in  $s$ .

If gene  $g$  overlaps or is broken by a set of segments,  $S = s_1, \dots, s_k$ , where  $k \geq 2$ , we assign  $C(p, g)$  with the copy number state of the segment having max *severity* based on the binary relation (Equation 5 and 6). For  $L_a(p, g)$ , the weighted sum of the median logRs (Equation 3) is used while for  $L_s(p, g)$ , the logR corresponding to the most severe segment is used (Equation 4).

$$L_a(p, g) = \left( \sum_{s \in S} \text{length}(s) * \text{medianLogR}(s) \right) / \sum_{s \in S} \text{length}(s) \quad (3)$$

$$L_s(p, g) = \text{logRvalueOf} \left( \underset{s \in S}{\text{argmax}} \{ \text{severity}(\text{CNstateOf}(s)) \} \right) \quad (4)$$

$$C(p, g) = \text{CNstateOf} \left( \underset{s \in S}{\text{argmax}} \{ \text{severity}(\text{CNstateOf}(s)) \} \right) \quad (5)$$

$$\begin{aligned} \text{severity} = & \{ ('NEUT', 0), \\ & ('HOMD', 8), ('HETD', 6), \\ & ('GAIN', 5), ('AMP', 6), ('HLAMP', 8), \\ & ('CNVHOMD', 4), ('CNVHETD', 3), \\ & ('CNVGAIN', 2), ('CNVAMP', 3), ('CNVHLAMP', 4) \} \end{aligned} \quad (6)$$

## 7.7 Subtype-specific analysis of copy number

A  $\chi^2$  (Chi-Square) test of independence was used to determine subtype association with copy number. For each gene  $g$ , copy number of the patients were divided into 3 levels: deletion (HOMD & HETD), gain (GAIN, AMP, HLAMP) and neutral. For the omnibus test, patients were divided into 2 levels (subtypes), Basal and non-Basal. No significant genes were found after using Bonferroni adjusted p-value cutoff of 0.1.

## 7.8 Outlier analysis

To identify genes whose expression was driven in cis by extreme copy number events, we fit Gaussian distributions to the 80 expression values of a gene across the patients in the cohort (for which RNASeq data was available), using the maximum likelihood estimates of the mean and variance. For genes with multiple probes, we summarized the expression level using the median. This resulted in 20878 Gaussian distributions, each corresponding to the expression profile of a gene.

We then sought to capture gene-patient ( $g, p$ ) events where large amplitude copy number events (such as putative homozygous deletions and high level amplifications) drives expression into the extreme tails of the expression profile. We selected events in 5% left-tail or 5% right-tail of the expression distributions. Events in the right tail whose copy number state was either amplification or high-level amplification (HLAMP) by HMM-Dosage and those events in the left tail whose copy number state was homozygous deletion (HOMD) were reported.

## 8 WGSS analysis for copy number

The following analysis is implemented into an R package called HMMcopy available from <http://compbio.bccrc.ca/software/hmmcopy/>.

## 8.1 Segmentation and copy number analysis of 15 WGSS tumour samples using 6-state HMM

The WGSS-derived copy number results used as input in APOLLOH (see below) were generated using a modified version of a paired tumour-normal strategy described previously in [32] and [9]. The genome was divided into fixed windows of 1kb, and read depth is extract for each window in the tumour and normal. In this study, we applied two additional preprocessing steps prior to segmentation in order to achieve more accurate copy number estimates. First, we applied a filter to remove repetitive regions that are highly mappable. Second, we corrected GC content bias to remove wave-like patterns in the tumour and normal, separately, using a loess curve fit between GC content and read depth. A log ratio is computed for each window by computing proportion between the GC corrected tumour value and GC corrected normal value.

### Divide the genome into fixed genomic windows

First, the genome was divided into fixed genomic windows of 1kb, reducing the analysis to a set of approximately 2.5 to 3 million loci,  $\mathbf{R}$ .

### Extract read depth for normal and tumour

Next, separately for the normal and tumour genomes of each patient, we extracted the total read depth for each window in  $\mathbf{R}$  using BAMtools [33], resulting in a vector of read count data from the normal,  $\mathbf{N}_R = (n_1, \dots, n_{|R|})$  and tumour,  $\mathbf{T}_R = (t_1, \dots, t_{|R|})$ , respectively.

### Removing windows that are highly mappable

Using "ENCODE Duke Uniqueness of 35bp sequences" track from UCSC (<http://genome.ucsc.edu/cgi-bin/hgTrackUi?db=hg18&g=wgEncodeMapability>), we filtered windows that were within repetitive regions, resulting in being highly mappable by aligners. Windows that had mappability score of  $\geq 0.9$  were excluded. This removed extreme amplified positions which would have otherwise posed as confounding outliers in downstream segmentation analysis.

### GC content correction of normal and tumour read counts

We performed GC content bias correction to the tumour and normal of each patient separately. We applied a global loess fit between GC content and read depth for windows in  $\mathbf{R}$ . Due to computational restrictions of fitting 3 million data points, we further excluded outlier windows based on read depths being in the upper and lower 1% quantile, and randomly sampled 20,000 of the remaining windows for generating the loess curve. Finally, the read depth of all windows,  $\mathbf{N}_R$  and  $\mathbf{T}_R$ , are corrected by scaling the observed value by the loess fitted value (Equation 7).

$$\text{corrected read depth} = \frac{\text{observed read depth}}{\text{loess fitted value}} \quad (7) \quad \text{\small \{eq:loess correct\}}$$

### Normalizing copy number in tumours

The GC corrected normal  $\mathbf{N}_R$  and tumour  $\mathbf{T}_R$  counts are normalized independently to generate  $\bar{\mathbf{N}}_R = (\bar{n}_1, \dots, \bar{n}_{|R|})$  and  $\bar{\mathbf{T}}_R = (\bar{t}_1, \dots, \bar{t}_{|R|})$ , respectively, where  $\bar{n}_i = \frac{n_i}{\sum_j n_j}$  and  $\bar{t}_i = \frac{t_i}{\sum_j t_j}$ ,  $i \in \{1, \dots, |R|\}$ . To obtain the final tumour copy number observed at each loci  $r \in R$ , we applied another normalization step by taking the log2 ratio between tumour and normal copy number,  $\mathbf{T}_N(\mathbf{i}) = \log_2\left(\frac{\bar{t}_i}{\bar{n}_i}\right)$ ,  $i \in \{1, \dots, |R|\}$ .

## Segmentation and copy number prediction via HMM

The 6-state version of HMM-Dosage was used to segment the input data  $T_N$ . Initialization and hyperparameters for the prior means of the Student's-t distribution used for this analysis were  $\log_2([1, 1.4, 2, 2.7, 3, 4.5])/2$ . Because the normalized tumour counts with the match normal read count naturally excludes germline CNVs, using the 11-state HMM-Dosage to distinguish CNA from CNV was not required.

## 8.2 Segment-based correlation of WGSS and SNP6 predicted copy number

Copy number results from WGSS data was used to help validate HOMD and HLAMP predictions in the Affymetrix SNP6 data. In the 15 cases, for each HOMD and HLAMP predicted segment,  $s$ , boundaries  $s_{start}$  and  $s_{end}$  and segment median  $a_s$  are extracted from the SNP6 results. We compute the median log ratio copy number  $w_s$  across the set of regions  $i \in R$  that overlap these boundaries  $s_{start}$  and  $s_{end}$ .

$$w_s = \text{median}(T_N(r)), \{r | r \in R, r_{start} \geq s_{start}, r_{end} \leq s_{end}\}$$

Spearman correlation is computed on  $w_{1:S}$  and  $a_{1:S}$  where  $S$  is the total number HOMD/HLAMP segments in the SNP6 results.

## 9 Analysis of LOH

We determined loss of heterozygosity (LOH) in the 15 WGSS and 50 exome samples using a probabilistic model packaged in the software called APOLLOH (Ha, et al manuscript in preparation). Preprocessing of the data is performed in a paired tumour-normal approach by interrogating informative heterozygous loci identified in the normal genomes using UnifiedGenotyper from GATK [34]. Next, the tumour genome allelic counts in the same loci are input into APOLLOH which performs segmentation of the allelic ratios into regions of LOH, allele-specific copy number amplification (ASCNA) and heterozygosity (HET). Copy number was also input into APOLLOH to enhance predictions within regions that deviate from copy neutral. For the WGSS samples, we used copy number results predicted by the previously described depth-based WGSS approach. For the exome samples, we used copy number results from the SNP6 genotyping arrays. Software for APOLLOH is available from the authors' website at : <http://compbio.bccrc.ca/software/apolloh/>.

## 10 Human regulatory region analysis

Analysis of 323 high-confidence somatic mutations in non-coding space showed that 72 were found to fall within experimentally determined human regulatory regions as described in [35]. For each variation contained within a ChIP-seq-defined region, the matrix for the corresponding TF was used to predict putative TFBSs overlapping the variation (reviewed in [36]). Two TFBS scores were generated, one corresponding to the reference genome sequence and the other corresponding to the observed cancer variation. A relative matrix score threshold of 80% was applied to define putative TFBSs. As the variations were selected to overlap regions of known transcription factor binding, we generally expect the reference allele to score higher for functionally significant changes (i.e. to go from a functional TFBS to a non-functional one). We called regulatory variations exceeding the 80% threshold as putatively impactful to transcription factor binding. In the TN breast cancer set, 2 such somatic mutations were predicted to affect MITF binding and 6 somatic mutations were predicted to affect RB binding.

## 11 DriverNet: Integrated analysis of copy number, mutations and gene expression data

To nominate mutations predicted to have significant impact on expression networks, we used the 681 Reactome FI gene sets containing 7521 genes to construct an 'influence graph' where genesets were used



to form 'cliques' in the graph. We then constructed a bipartite graph such that each gene that was in the mutation list from sequencing or HOMB, HLAMP list from CNA analysis was placed in one partition of the graph and the outlying expression genes (as described above) was placed in the other partition. Edges between nodes in the two partitions were drawn according to the following criteria:

- a mutation and an outlying expression event co-occurred in the same tumour
- an edge between the two genes was present in the influence graph

With the influence graph constructed, we then sought to rank the genes in the 'mutation' partition such that nodes explaining the highest number of outlying expression events (by greedy algorithm) were nominated as putative driver mutations. The greedy algorithm is an efficient approximation to the combinatorial optimization problem induced by the bipartite graph construction that we wish to solve in order to predict the fewest number of mutations that disrupt the maximum number of expression signatures.

The statistical significance of the candidate genes are assessed using a randomization framework. Given the original dataset  $S$ , the algorithm is run on randomly generated datasets  $N$  times ( $S_1, \dots, S_N$ ) and then the results on real data are assessed to see if they are significantly different from the randomized datasets. This in an indirect way of perturbing the bipartite graph corresponding to the original problem. To generate the random datasets, we keep the contents of patient-mutation,  $M$ , and patient-outlier,  $G'$ , matrices the same but replace the gene symbols with a randomly selected set of genes from the Ensembl 54 protein-coding gene list. Using the same influence graph, the algorithm is run on the new patient-mutation,  $M_1 \dots M_M$ , and patient-outlier,  $G'_1 \dots G'_M$ , matrices.

Suppose  $D$  is the result of driver mutation discovery algorithm on the input  $U$ .  $D$  contains a ranked list of driver genes with their corresponding node coverage in the bipartite graph,  $\mathcal{B}$ . The statistical significance of a gene  $g \in D$  with a corresponding node coverage,  $COV_g$ , is the fraction of times that we observe driver genes in our random data runs  $D_i$ , with node coverage more than  $COV_g$ :

$$pvalue(g) = \frac{\sum_{i=1}^N \sum_{j=1}^M \delta[COV_{gj} > COV_g]}{N * \sum_{i=1}^N M_i} \quad (8)$$

where  $M_i$  is the number of drivers identified in run  $n$  of the algorithm,  $N$  is the total number of times that the algorithm on random datasets were run.

Software for this analysis called *DriverNet* (Haffari et al., manuscript in preparation) is available from the authors' website: <http://compbio.bccrc.ca/software/drivernet>. Pathway analysis of the top 50 genes output by the greedy algorithm was performed using Reactome as described above.

## 12 Clonal frequency analysis

We used a hierarchical Bayesian model which accounts for uncertainty about genotype to estimate the frequency of cells with a given mutation. We imagine each mutation divides the population of cells into two classes; those without the mutation we call the reference population and those with we refer to as the variant population. We treat the reference population as though it has fixed genotype of AA. We model the genotype of the variant population at a given locus using one of 27 states allowing for copy numbers from 1-6 and differing zygosity status. We use information about copy number and LOH status derived from APOLLOH exome analysis to inform or prior beliefs on the genotype of the variant population. To allow multiple mutations to have the same frequency, we use a Dirichlet process prior on the class frequencies. Sites which are clustered by this model have cellular frequencies which are sufficiently similar that they are better explained as originating from a single class of cells. Inference for this model is performed using Markov chain Monte Carlo sampler. A full description of the hierarchical Bayesian model shown as a probabilistic graphical model is shown in Figure S10. Input to the model is a set of mutations and their allele abundance (reference, variant). In addition, the copy number and LOH status at the position of each mutation is given. The output of the model is a mutation co-occurrence matrix containing the proportion of MCMC samples in which each pair of mutations were grouped together, and the clonal frequency estimation for each of the MCMC samples, thus allowing inference of a posterior distribution of clonal frequency estimates.

{sec:clonal}

Software implementing this approach called *PyClone* (Roth et al., manuscript in preparation) is available upon request from the authors. Cases with 10 more more mutations were included in the clonal frequency analysis. This led to estimates for 2109 mutations distributed across 54 cases. We clustered the mutation co-occurrence matrix for each case using hierarchical clustering and deterministically assessed the groupings of mutations into 'clonal clusters' using the R library *dynamicTreeCut* [37]. Clonal frequency distributions for each mutation were then plotted as in Figure 4 according to these groupings.

Each pathway in Reactome was also assessed for skewing of clonal frequency by Wilcoxon test. Clonal frequency estimates for each case were first adjusted by normalizing by the maximum clonal frequency value to remove the effect of normal cell contamination. The adjusted clonal frequencies were then used to assess whether the distributions of the mutations falling into a given pathway were different than the background distribution of all clonal frequency estimates using the R implementation of the Wilcoxon test `wilcox.test`. Resultant p-values were then adjusted using `p.adjust` with `method="BH"`.

## References

- [1] Wiegand, K. C. *et al.* Arid1a mutations in endometriosis-associated ovarian carcinomas. *N Engl J Med* **363**, 1532–1543 (2010).
- [2] Gnirke, A. *et al.* Solution hybrid selection with ultra-long oligonucleotides for massively parallel targeted sequencing. *Nat Biotechnol* **27**, 182–189 (2009).
- [3] Morin, R. D. *et al.* Frequent mutation of histone-modifying genes in non-hodgkin lymphoma. *Nature* **476**, 298–303 (2011).
- [4] McKernan, K. J. *et al.* Sequence and structural variation in a human genome uncovered by short-read, massively parallel ligation sequencing using two-base encoding. *Genome Research* **19**, 1527–1541 (2009).
- [5] Li, H., Ruan, J. & Durbin, R. Mapping short dna sequencing reads and calling variants using mapping quality scores. *Genome Res* **18**, 1851–1858 (2008).
- [6] Roth, A. *et al.* Jointsnmix : A probabilistic model for accurate detection of somatic mutations in normal/tumour paired next generation sequencing data. *Bioinformatics* (2012).
- [7] Ding, J. *et al.* Feature-based classifiers for somatic mutation detection in tumour-normal paired sequencing data. *Bioinformatics* **28**, 167–175 (2012).
- [8] Reva, B., Antipin, Y. & Sander, C. Predicting the Functional Impact of Protein Mutations: Application to Cancer Genomics. *Nucleic Acids Research* (2011, in press).
- [9] Shah, S. P. *et al.* Mutational evolution in a lobular breast tumour profiled at single nucleotide resolution. *Nature* **461**, 809–13 (2009).
- [10] Li, H. *et al.* The Sequence Alignment/Map format and SAMtools. *Bioinformatics* **25**, 2078–2079 (2009).
- [11] Wu, T. D. & Nacu, S. Fast and snp-tolerant detection of complex variants and splicing in short reads. *Bioinformatics* **26**, 873–881 (2010).
- [12] Goya, R. *et al.* SNVMix: predicting single nucleotide variants from next-generation sequencing of tumors. *Bioinformatics* **26**, 730–736 (2010).
- [13] Flicek, P. *et al.* Ensembl's 10th year. *Nucl. Acids Res.* **38**, D557–562 (2010).
- [14] Pruitt, K. D., Tatusova, T. & Maglott, D. R. NCBI reference sequences (RefSeq): a curated non-redundant sequence database of genomes, transcripts and proteins. *Nucl. Acids Res.* **35**, D61–65 (2007).

- [15] Thierry-Mieg, D. & Thierry-Mieg, J. AceView: a comprehensive cDNA-supported gene and transcripts annotation. *Genome Biology* **7**, S12 (2006).
- [16] Dimon, M. T., Sorber, K. & DeRisi, J. L. HMMSplicer: a tool for efficient and sensitive discovery of known and novel splice junctions in RNA-Seq data. *PLoS ONE* **5**, e13875 (2010).
- [17] Li, H. & Durbin, R. Fast and accurate short read alignment with Burrows-Wheeler transform. *Bioinformatics* **25**, 1754–1760 (2009).
- [18] Burrows, M. & Wheeler, D. J. A block-sorting lossless data compression algorithm (1994).
- [19] Bolstad, B., Irizarry, R., Astrand, M. & Speed, T. A comparison of normalization methods for high density oligonucleotide array data based on variance and bias. *Bioinformatics* **19**, 185–193 (2003).
- [20] Bullard, J., Purdom, E., Hansen, K. & Dudoit, S. Evaluation of statistical methods for normalization and differential expression in mRNA-Seq experiments. *BMC Bioinformatics* **11**, 94 (2010).
- [21] Parker, J. S. *et al.* Supervised risk predictor of breast cancer based on intrinsic subtypes. *Journal of Clinical Oncology* **27**, 1160–1167 (2009).
- [22] McPherson, A. *et al.* deFuse: An Algorithm for Gene Fusion Discovery in Tumor RNA-Seq Data. *PLoS Comput Biol* **7** (2011).
- [23] McPherson, A. *et al.* Comrad: detection of expressed rearrangements by integrated analysis of rna-seq and low coverage genome sequence data. *Bioinformatics* **27**, 1481–1488 (2011).
- [24] Wu, G., Feng, X. & Stein, L. A human functional protein interaction network and its application to cancer data analysis. *Genome Biology* **11**, R53 (2010).
- [25] Smoot, M. E., Ono, K., Ruscheinski, J., Wang, P. L. & Ideker, T. Cytoscape 2.8: new features for data integration and network visualization. *Bioinformatics* **27**, 431–432 (2011).
- [26] Merico, D., Isserlin, R., Stueker, O., Emili, A. & Bader, G. D. Enrichment map: a network-based method for gene-set enrichment visualization and interpretation. *PLoS ONE* **5**, e13984 (2010).
- [27] Bengtsson, H., Wirapati, P. & Speed, T. P. A single-array preprocessing method for estimating full-resolution raw copy numbers from all affymetrix genotyping arrays including genomewidesnp 5 & 6. *Bioinformatics* **25**, 2149–56 (2009).
- [28] Shah, S. P. *et al.* Integrating copy number polymorphisms into array cgh analysis using a robust hmm. *Bioinformatics* **22**, e431–9 (2006).
- [29] Curtis, C. *et al.* The genomic and transcriptomic architecture of 2,000 breast tumours reveals novel subgroups. *Nature* (2012, accepted for publication).
- [30] Conrad, D. F. *et al.* Origins and functional impact of copy number variation in the human genome. *Nature* **464**, 704–12 (2010).
- [31] Bignell, G. R. *et al.* Signatures of mutation and selection in the cancer genome. *Nature* **463**, 893–898 (2010).
- [32] Chiang, D. Y. *et al.* High-resolution mapping of copy-number alterations with massively parallel sequencing. *Nat Methods* **6**, 99–103 (2009).
- [33] Barnett, D. W., Garrison, E. K., Quinlan, A. R., Strömberg, M. P. & Marth, G. T. Bamtools: a c++ api and toolkit for analyzing and managing bam files. *Bioinformatics* **27**, 1691–1692 (2011).
- [34] McKenna, A. *et al.* The genome analysis toolkit: a mapreduce framework for analyzing next-generation dna sequencing data. *Genome Res* **20**, 1297–1303 (2010).
- [35] Chicas, A. *et al.* Dissecting the unique role of the retinoblastoma tumor suppressor during cellular senescence. *Cancer Cell* **17**, 376–387 (2010).

- [36] Worsley-Hunt, R., Bernard, V. & Wasserman, W. W. Identification of cis-regulatory sequence variations in individual genome sequences. *Genome Med* **3**, 65–65 (2011).
- [37] Langfelder, P., Zhang, B. & Horvath, S. "defining clusters from a hierarchical cluster tree: the dynamic tree cut package for r. *Bioinformatics* **24**, 719–720 (2007).

# Supplemental Tables for Shah et al: The clonal and mutational evolution spectrum of primary triple negative breast cancers

This file contains the legends describing Tables S1-17. All tables are available as an archived zip file in the Supplemental Data from the Nature website.

Table 1: Summary of data generation for 54 tumour and normal DNA exome libraries and 80 RNASeq transcriptome libraries. RNASeq and exome libraries were 50bp paired end Illumina sequence data. For RNASeq data, the number of aligned reads in exons, introns and intergenic regions of the genome are listed with three mapping quality categories. Mean, median and standard deviation of targeted exon coverage is listed for each exome library. Total acquired data for 15 SOLiD whole genome shotgun tumour/normal pairs are also listed.

{stab:data'summary'all}

Table 2: Summary of clinical characteristics of the patients. A full data dictionary describing all clinical variables is presented (Sheet 2)

{stab:clin'data'table}

Table 3: Omnibus table of validated somatic SNVs. All mutations were revalidated with deep amplicon resequencing. There were 2414 somatic point mutations that revalidated. Mutations were annotated with MutationAssessor (<http://mutationassessor.org/>, [1]). Column descriptions are as follows: **id**: unique patient/genome coordinate (NCBI build36, hg18); **Patient.ID**: case id; **Chr**: chromosome; **Coord**: chromosomal position; **Mutation**: nucleotide substitution; **RG.var.type**: missense, nonsense or silent mutation; **Func..Impact**: mutationassessor Functional impact class; **FI.score**: mutationassessor Functional impact score; **AA.variant**: amino acid substitution; **Gene**: gene name (HGNC); **Location**: chromosomal band; **Uniprot**: uniprot id; **Refseq**: ref-seq id; **mutations.in.COSMIC.position**: previously reported mutations at the same genomic coordinate in the COSMIC database; **types.of.cancer.in.COSMIC.position**: description of previously reported COSMIC mutations; **gene.s.known.role.in.cancer**: cancer gene census; **regions.position**: affected protein/domain localisation; **Ref.count.Tumour.**: resequencing reads from the tumour DNA matching the reference; **Alt.count.Tumour.**: resequencing reads from the tumour DNA matching the variant; **Total.count.Tumour.**: total resequencing reads from the tumour DNA; **Alt.frequency..Tumour.**: proportion of resequencing reads that are variant; **Binomial.test.p.value..Tumour.**: Binomial exact test p-value; **Binomial.test.corrected.p.value..Tumour.**: Binomial exact test corrected p-value; **Binomial.test.status..Tumour.**: Binomial exact test corrected p-value < 0.01?; **Ref.count..Normal.**: resequencing reads from the matched normal DNA matching the reference; **Alt.count..Normal.Total.count..Normal.**: resequencing reads from the normal DNA matching the variant; **Alt.frequency..Normal.**: proportion of resequencing reads matching the variant; **Binomial.test.p.value..Normal.**: Binomial exact test p-value; **Binomial.test.corrected.p.value.Normal.**: Binomial exact test corrected p-value; **Binomial.test.status.Normal.**: Binomial exact test corrected p-value < 0.01?; **SVNMix2.Call.RNASeq**: most probable genotype from SNVMix2 [2] (0 - not expressed, 1 - wildtype expressed, 2 - heterozygously expressed, 3 - homozygously expressed); **Ref.RNASeq.**: number of reference reads at position from the matching RNASeq data; **Nonref.RNASeq.**: number of variant reads at position from the matching RNASeq data; **Ens54Gene**: Ensembl v54 gene name; **Strand**: gene strand; **CNCall**: copy number state; **CNLogR**: SNP6.0 median log ratio for the overlapping segment at this position; **PAM50**: PAM50 class (Basal/Other) for this case; **Splice.site**: position is a dinucleotide donor/acceptor splice site (TRUE/FALSE); **HMMDosage.Call**: copy number state; **HMMDosage\_LogR**: raw continuous copy number value; **OncoSNP\_Call**: predicted OncoSNP [3] state; **OncoSNP\_CN**: predicted OncoSNP copy number; **apolloh.loh.ratio**: raw LOH value from APOLLOH analysis (see supplemental methods); **apolloh.call**: LOH call from APOLLOH from exomes; **APOLLOH.WGSS.Call**: LOH call from APOLLOH from genomes; **APOLLOH.WGSS.CN**: copy number used for APOLLOH analysis; **HMMcopy.WGSS.Call**: copy number inferred from genome data; **HMMcopy.WGSS\_CN**: normalized logR input for genome-based copy number analysis; **mut.freq.GBM**: frequency of mutation in gene in TCGA GBM data; **mut.freq.HGS**: frequency of mutation in gene in TCGA HGS data; **clonality**: estimation of clonal frequency.

{stab.validated'somatic'SN}

Table 4: Validated SNVs at dinucleotide donor/acceptor splice sites (based on Ensembl v54 annotations) inducing alternative splicing or intron retention in the RNASeq data: legends as per Table S3.

{stab.validated'somatic'spli}

Table 5: Validated somatic insertions and deletions. Scores are as predicted by samtools pileup [4].

{stab.validated'somatic'ind}

Table 6: Table of CNA segments for 104 Affymetrix SNP6.0 arrays, predicted as described in Supplemental methods. Columns are CaseID; Chromosome; segment start coordinate (NCBI build 36); segment end coordinate; number of probes in segment; median logratio of segment; HMMDosage state (somatic states are HMD: homozygous deletion, HETD: hemizygous deletion: GAIN: single copy gain, AMP: amplification, HLAMP: high-level amplification (see Supplemental methods); HGNC gene names of genes contained in the segment. The first six columns can be extracted and viewed in the Integrated Genomics Viewer Software (<http://www.broadinstitute.org/igv/>).

{stab:CNA'frequency'table}

Table 7: Summary of 517 CNA breakpoint-corroborated gene fusions predicted by deFuse [5]. In addition to the columns described at <http://compbio.bccrc.ca>, 2 columns (gene\_1\_broken, gene\_2\_broken) identify which genes are interrupted by a CNV breakpoint, and 2 columns (transition\_type\_1, transition\_type\_2) identify the type of the transition.

{stab:defuse'predictions}

Table 8: Summary of genomic breakpoints from a targeted search for supporting paired end reads in 15 SOLiD paired end tumour genomes. Shown are the case identifier, genes involved in the fusion, breakpoint sequence, and number of supporting paired end reads.

{stab:solid'genome'breaks}

Table 9: Integrated genome/transcriptome analysis for expressed gene fusions with corroborated genome rearrangements from 5 tumours (SA029, SA030, SA031, SA051, SA054) for which both RNASeq and low-pass whole genome shotgun data generated with Illumina paired end sequencing was obtained. Analysis was performed using Comrad (<http://fusioncomrad.sf.net>). A description of the table format can be found at <http://fusioncomrad.sf.net>

{stab:comrad'results}

Table 10: A subset of 35/63 selected gene fusion candidates from Table S7 that were validated with PCR.

{stab:validated'fusions}

Table 11: 72 non-coding mutations falling in regulatory regions showing 23 mutations in Rb transcription factor binding sites and relative scores of predicted Rb binding in wildtype vs mutant tfbs sequences

{stab:regions}

Table 12: Mutation frequency by gene for somatic SNV, indel and splice site mutations

{stab:snv'indel'gene'frequ}

Table 13: Mutation significance analysis showing genes predicted to be under selection through analysis of background synonymous mutations and non-synonymous mutations. All genes were analysed using methodology outlined in Youn and Simon [6].

{stab:mutsig}

Table 14: Enriched pathways from the network computed from recurrent somatically mutated genes in the Reactome functional interaction map. Enriched pathways with  $FDR \leq 0.001$  are included.

{stab:mutations'pathways }

Table 15: Analysis of the top somatically aberrated genes (by node degree) connected (by Reactome gene sets) to genes that exhibited outlying expression from their population level distributions as computed by driverNet. Columns: Rank: by driverNet algorithm (Supplemental methods); Gene: somatically aberrated gene; gband: chromosomal band containing gene; SNV/Indel: number of cases harbouring an SNV or indel in the gene; HLAMP: number of cases harbouring a predicted high level amplification; HOMD: number of cases harbouring a predicted homozygous deletion; events: number of gene expression outliers (see Supplemental methods) coincident with a genomic aberration and where the outlying gene is connected to the aberrated gene; p-value: statistical significance based on a randomly generated background distribution (Supplemental methods).

{stab:drivernetall }

Table 16: Comparison of significantly enriched pathways ( $FDR < 0.005$ ) by Reactome analysis from the top 50 genes predicted by driverNet (Supplemental methods) for TNBC and ovarian high grade serous (HGS) data from the TCGA [7]. The pathway, the initial p-value, the adjusted p-value the driverNet genes and the overlap status are shown, where status=1 indicates TNBC specific pathway, status=2 indicates HGS and TNBC enriched pathways and status=3 indicates HGS specific pathways.

{stab:tnbc'ohgs }

Table 17: Analysis of the distributions of clonal frequency estimates of genes in Reactome pathways. For each set of genes belonging to a pathway, a Wilcoxon test was performed to assess whether the distribution of the clonal frequencies of genes in a pathway was different than the overall background distribution. For each pathway, the name of the Reactome pathway, the geneset of the pathway, the mutated genes that fall into the pathway, the number of such mutation events, the median clonal frequency estimate, the Wilcoxon p-value, and adjusted p-value (Benjamini-Hochberg) are shown.

{stab:pathway'clonal'freque }



## References

- [1] Reva, B., Antipin, Y. & Sander, C. Predicting the functional impact of protein mutations: application to cancer genomics. *Nucleic Acids Res* **39** (2011).
- [2] Goya, R. *et al.* SNVMix: predicting single nucleotide variants from next-generation sequencing of tumors. *Bioinformatics* **26**, 730–736 (2010).
- [3] Yau, C. *et al.* A statistical approach for detecting genomic aberrations in heterogeneous tumor samples from single nucleotide polymorphism genotyping data. *Genome Biol* **11** (2010).
- [4] Li, H. *et al.* The Sequence Alignment/Map format and SAMtools. *Bioinformatics* **25**, 2078–2079 (2009).
- [5] McPherson, A. *et al.* deFuse: An Algorithm for Gene Fusion Discovery in Tumor RNA-Seq Data. *PLoS Comput Biol* **7** (2011).
- [6] Youn, A. & Simon, R. Identifying cancer driver genes in tumor genome sequencing studies. *Bioinformatics* **27**, 175–181 (2011).
- [7] Cancer Genome Atlas Research Network. Integrated genomic analyses of ovarian carcinoma. *Nature* **474**, 609–615 (2011).
